# Supplementary material for: Genome Sequencing and Comparative Genomics Analysis Revealed Pathogenic Potential in Penicillium capsulatum as a Novel Fungal Pathogen Belonging to Eurotiales
Source: Front Microbiol. 2016 Oct 5;7:1541. doi: 10.3389/fmicb.2016.01541 (PMC5051111; doi:10.3389/fmicb.2016.01541)
Supplement: Supplementary file 2 [file Table_2.xlsx]

## Sheet: CBS 134186
Table S2. Function annotation for predicted genes in P. capsulatum strain (CBS 134186 )
Gene ID	Contig	start	end	strain	NR database	Molecular Function	Swiss-prot	KOG
g1	contig_17	537	1168	+	-	-	-	-
g2	contig_17	8481	9113	+	-	-	-	-
g3	contig_17	16426	17058	+	-	-	-	-
g4	contig_17	23374	24183	+	gi|425774322|gb|EKV12630.1|	-	-	-
g5	contig_17	24871	26538	-	gi|557724239|dbj|GAD97070.1|	GO:0016841	Phenylalanine/tyrosine ammonia-lyase	KOG0222
g6	contig_17	29391	30284	+	gi|425780653|gb|EKV18659.1|	GO:0004523	-	-
g7	contig_17	30450	30662	+	-	-	-	-
g8	contig_17	32055	32943	+	gi|255936629|ref|XP_002559341.1|	-	-	-
g9	contig_17	36448	38279	-	gi|121720064|ref|XP_001276730.1|	GO:0020037	Trichodiene oxygenase	KOG0158
g10	contig_17	39715	40584	+	gi|121720062|ref|XP_001276729.1|	GO:0008171	Probable caffeoyl-CoA O-methyltransferase 1	KOG1663
g11	contig_17	41225	42667	-	gi|121720058|ref|XP_001276727.1|	GO:0016747	Fumigaclavine B O-acetyltransferase
g12	contig_17	42935	44055	-	gi|121720056|ref|XP_001276726.1|	GO:0016491	Tyrosinase
g13	contig_17	46151	50134	-	gi|121720054|ref|XP_001276725.1|	GO:0004497	Phenol 2-monooxygenase	KOG3855
g14	contig_17	52101	55184	+	gi|119501761|ref|XP_001267637.1|	GO:0048037	Linear gramicidin synthase subunit D	KOG1178
g15	contig_17	56216	60136	+	gi|258571796|ref|XP_002544701.1|	GO:0048037	Nonribosomal peptide synthetase 6	KOG1178
g16	contig_17	61802	62719	-	gi|528206774|gb|AGS32042.1|	-	Uncharacterized protein Mb3657 sp|P67772.1|Y3633_MYCTU RecName: Full=Uncharacterized protein Rv3633/MT3735
g17	contig_17	65692	67141	+	gi|525580385|gb|EPS26635.1|	GO:0004553	Endochitinase 1	KOG2806
g18	contig_17	71036	71522	-	gi|342877264|gb|EGU78750.1|	-	Levanase	KOG0228
g19	contig_17	71620	72154	-	gi|517323836|emb|CCT73859.1|	-	Levanbiose-producing levanase	KOG0228
g20	contig_17	73966	74310	+	gi|134077855|emb|CAK40096.1|	-	-	-
g21	contig_17	75198	76964	-	gi|255956759|ref|XP_002569132.1|	GO:0022857	Probable glucose transporter rco-3	KOG0254
g22	contig_17	82871	83695	+	-	-	-	-
g23	contig_17	83748	84044	+	gi|425780653|gb|EKV18659.1|	-	-	-
g24	contig_17	84189	84668	+	gi|425774322|gb|EKV12630.1|	-	-	-
g25	contig_17	85169	87761	+	gi|238508578|ref|XP_002385478.1|	GO:0004523	RNA-directed DNA polymerase from mobile element jockey	KOG1075
g26	contig_17	88260	90329	-	gi|353245204|emb|CCA76258.1|	-	Retrovirus-related Pol polyprotein from transposon TNT 1-94	KOG0017
g27	contig_17	94406	96558	+	gi|425765490|gb|EKV04167.1|	GO:0046983	Putative AC transposase	KOG1121
g28	contig_17	98947	99701	-	gi|425778290|gb|EKV16427.1|	-	-	-
g29	contig_17	101404	105341	+	gi|255930485|ref|XP_002556802.1|	GO:0003676	-	-
g30	contig_17	108711	109967	-	gi|425774057|gb|EKV12377.1|	GO:0003677	-	-
g31	contig_17	111097	112860	-	gi|242789268|ref|XP_002481326.1|	GO:0005515	Plexin-A3
g32	contig_17	117894	119996	+	gi|242789268|ref|XP_002481326.1|	GO:0005515	Fibrocystin-L
g33	contig_17	129406	131876	+	gi|599154701|gb|EYE93937.1|	GO:0008270	Transcriptional activator protein acu-15
g34	contig_17	135088	136074	+	gi|238505762|ref|XP_002384088.1|	GO:0005515	Ankyrin repeat domain-containing protein 50	KOG4177
g35	contig_17	136821	140170	-	gi|584414244|emb|CDM33021.1|	GO:0005515	Protein argonaute 5	KOG1041
g36	contig_17	143165	146126	+	gi|584414076|emb|CDM32852.1|	GO:0003677	Copia protein	KOG0017
g37	contig_17	146309	148050	+	gi|255951765|ref|XP_002566649.1|	-	Retrovirus-related Pol polyprotein from transposon TNT 1-94	KOG0017
g38	contig_17	148600	150397	-	gi|255946718|ref|XP_002564126.1|	-	Uncharacterized protein YDR124W
g39	contig_17	161690	163066	+	gi|317147772|ref|XP_001822274.2|	-	Nucleic-acid-binding protein from transposon X-element
g40	contig_17	165479	168045	-	gi|425765381|gb|EKV04078.1|	-	Retrovirus-related Pol polyprotein from transposon TNT 1-94	KOG0017
g41	contig_17	168125	170428	-	gi|425769660|gb|EKV08147.1|	-	-	-
g42	contig_17	171889	173935	+	gi|255930485|ref|XP_002556802.1|	GO:0003676	Pogo transposable element with ZNF domain
g43	contig_17	178914	179338	-	-	-	-	-
g44	contig_17	179731	180896	-	-	-	-	-
g45	contig_17	180975	182666	+	gi|83775366|dbj|BAE65488.1|	GO:0003964	RNA-directed DNA polymerase from mobile element jockey	KOG1075
g46	contig_17	182722	183384	+	gi|425780653|gb|EKV18659.1|	-	-	-
g47	contig_17	183735	190635	-	gi|584412151|emb|CDM30917.1|	GO:0016491	Lovastatin nonaketide synthase	KOG1202
g48	contig_17	191517	192492	+	gi|584412150|emb|CDM30916.1|	-	-	-
g49	contig_17	195238	196792	-	gi|255930485|ref|XP_002556802.1|	GO:0003676	Jerky protein homolog-like
g50	contig_17	198096	202103	+	gi|255943827|ref|XP_002562681.1|	GO:0042626	Leptomycin B resistance protein pmd1	KOG0055
g51	contig_17	205612	207749	-	gi|525582506|gb|EPS28756.1|	-	Beta-lactamase-like protein 2
g52	contig_17	215654	217587	+	gi|584414076|emb|CDM32852.1|	-	-	-
g53	contig_17	217690	221353	+	gi|425767334|gb|EKV05908.1|	GO:0003677	Retrovirus-related Pol polyprotein from transposon TNT 1-94	KOG0017
g54	contig_17	221800	222333	-	gi|255938766|ref|XP_002560153.1|	-	-	-
g55	contig_17	223080	223652	+	gi|607896254|gb|EZF34794.1|	-	Uncharacterized protein YkkB
g56	contig_17	224212	225195	-	gi|452989150|gb|EME88905.1|	GO:0016491	Succinate-semialdehyde dehydrogenase [NADP(+)] GabD	KOG2451
g57	contig_17	226485	227198	-	gi|358372440|dbj|GAA89043.1|	-	-	-
g58	contig_17	227689	228597	-	gi|494832550|gb|EON68774.1|	GO:0004026	-	-
g59	contig_17	229974	230734	+	-	-	-	-
g60	contig_17	231825	232907	+	gi|67541302|ref|XP_664425.1|	-	-	-
g61	contig_17	234316	240537	-	gi|255955899|ref|XP_002568702.1|	-	Vegetative incompatibility protein HET-E-1
g62	contig_17	244169	246882	-	gi|255943925|ref|XP_002562730.1|	GO:0008484	Choline-sulfatase
g63	contig_17	247160	248356	+	gi|255943927|ref|XP_002562731.1|	-	-	-
g64	contig_17	250444	252532	-	gi|525580979|gb|EPS27229.1|	GO:0051287	UDP-glucose 6-dehydrogenase	KOG2666
g65	contig_17	254052	255310	-	gi|525580981|gb|EPS27231.1|	-	UDP-galactose transporter 1	KOG1441
g66	contig_17	256501	257676	+	gi|512187022|gb|EPE02805.1|	-	-	-
g67	contig_17	257987	259809	-	gi|584416522|emb|CDM28227.1|	-	Putative HC-toxin efflux carrier TOXA	KOG0254
g68	contig_17	263609	264682	-	gi|119501741|ref|XP_001267627.1|	-	Extracellular metalloprotease
g69	contig_17	266925	268928	+	gi|350632311|gb|EHA20679.1|	-	-	-
g70	contig_17	269368	270756	-	gi|115399656|ref|XP_001215439.1|	-	-	-
g71	contig_17	272701	278448	-	gi|615413147|ref|XP_007584164.1|	GO:0008061	Killer toxin subunits alpha/beta	KOG2806
g72	contig_17	279115	281301	+	gi|573054877|gb|ETS74812.1|	-	-	-
g73	contig_17	284519	286155	-	gi|596659384|ref|XP_007274794.1|	-	-	-
g74	contig_17	288530	295476	+	gi|317148732|ref|XP_001822829.2|	GO:0022857	Uncharacterized WD repeat-containing protein alr3466	KOG0254
g75	contig_17	296903	298249	-	gi|599156189|gb|EYE95350.1|	-	-	-
g76	contig_17	300845	301798	-	gi|517296234|ref|WP_018485052.1|	GO:0030170	Cysteine synthase	KOG1252
g77	contig_17	303933	304865	+	gi|425767181|gb|EKV05757.1|	GO:0016491	Uncharacterized oxidoreductase SERP2049_x0001_sp|Q8CN40.1|Y2036_STAES RecName: Full=Uncharacterized oxidoreductase SE_2036	KOG1014
g78	contig_17	305713	306312	-	gi|557725525|dbj|GAD95797.1|	-	Fatty acid synthase subunit beta
g79	contig_17	306843	307140	-	gi|255942146|ref|XP_002561842.1|	GO:0005515	-	-
g80	contig_17	308188	314653	-	gi|391865756|gb|EIT75035.1|	GO:0050662	Putative uncharacterized oxidoreductase C513.07	KOG1502
g81	contig_17	315644	316675	-	gi|525579292|gb|EPS25542.1|	GO:0016491	Zinc-type alcohol dehydrogenase-like protein PB24D3.08c	KOG1196
g82	contig_17	317896	319068	+	gi|512194012|gb|EPE09769.1|	-	-	-
g83	contig_17	319538	321127	-	gi|255956329|ref|XP_002568917.1|	-	Uncharacterized transporter C36.03c	KOG0255
g84	contig_17	324346	326261	-	gi|255930485|ref|XP_002556802.1|	GO:0003677	Tigger transposable element-derived protein 2
g85	contig_17	327432	328677	-	gi|477587501|gb|ENI04582.1|	-	-	-
g86	contig_17	330246	332312	+	gi|440637728|gb|ELR07647.1|	-	-	-
g87	contig_17	334035	335726	+	gi|358374878|dbj|GAA91467.1|	GO:0022857	Arabinose-proton symporter	KOG0254
g88	contig_17	337621	338661	+	gi|121717127|ref|XP_001276016.1|	-	-	-
g89	contig_17	340345	343039	-	gi|391870376|gb|EIT79561.1|	GO:0020037	Probable pectin lyase F-1	KOG0159
g90	contig_17	344135	345732	+	gi|317150935|ref|XP_001824159.2|	-	-	-
g91	contig_17	349498	351285	-	gi|255943941|ref|XP_002562738.1|	GO:0022857	High-affinity glucose transporter	KOG0254
g92	contig_17	353234	358319	-	gi|255940952|ref|XP_002561245.1|	GO:0004523	Putative 115 kDa protein in type-1 retrotransposable element R1DM	KOG1075
g93	contig_17	359024	361305	-	gi|67903036|ref|XP_681774.1|	-	Vegetative incompatibility protein HET-E-1	KOG0266
g94	contig_17	361527	367298	+	gi|225559733|gb|EEH08015.1|	GO:0003824	Vegetative incompatibility protein HET-E-1	KOG0271
g95	contig_17	370529	373619	-	gi|242761252|ref|XP_002340144.1|	GO:0042802	Kinesin light chain 1	KOG1840
g96	contig_17	375421	376501	+	gi|255934901|ref|XP_002558477.1|	-	-	-
g97	contig_17	376853	381151	-	gi|525582807|gb|EPS29057.1|	-	Vegetative incompatibility protein HET-E-1	KOG0266
g98	contig_17	381971	383059	-	gi|238508362|ref|XP_002385376.1|	GO:0003824	-	-
g99	contig_17	384399	388328	+	gi|242805545|ref|XP_002484554.1|	-	Vegetative incompatibility protein HET-E-1	KOG0266
g100	contig_17	389222	390628	-	gi|255934901|ref|XP_002558477.1|	-	-	-
g101	contig_17	397511	397908	-	gi|255934865|ref|XP_002558459.1|	-	-	-
g102	contig_17	413744	414586	-	gi|255934925|ref|XP_002558489.1|	-	-	-
g103	contig_17	419782	423592	+	gi|525582803|gb|EPS29053.1|	-	Vegetative incompatibility protein HET-E-1	KOG0295
g104	contig_17	434564	435579	-	gi|525582782|gb|EPS29032.1|	GO:0008168	Arsenite methyltransferase	KOG1269
g105	contig_17	436331	437685	-	gi|255934959|ref|XP_002558506.1|	GO:0008508	Arsenite resistance protein ArsB
g106	contig_17	438599	439015	+	gi|584407437|emb|CDM36261.1|	-	Protein ArsC
g107	contig_17	439450	440545	-	gi|119471304|ref|XP_001258149.1|	-	-	-
g108	contig_17	443718	444830	+	gi|425767334|gb|EKV05908.1|	-	Retrovirus-related Pol polyprotein from transposon TNT 1-94	KOG0017
g109	contig_17	447674	454983	+	gi|599156938|gb|EYE96052.1|	GO:0043169	Cell wall alpha-1,3-glucan synthase mok13
g110	contig_17	455809	462468	-	gi|115384802|ref|XP_001208948.1|	GO:0016787	Nudix hydrolase 1
g111	contig_17	464122	466735	+	gi|119494233|ref|XP_001264012.1|	GO:0004553	Probable beta-glucosidase M
g112	contig_17	466876	468333	-	gi|238499151|ref|XP_002380810.1|	-	Monocarboxylate transporter 10	KOG2504
g113	contig_17	470062	472310	-	gi|255943943|ref|XP_002562739.1|	GO:0003997	Peroxisomal acyl-coenzyme A oxidase 1	KOG0136
g114	contig_17	472747	474278	-	gi|255943945|ref|XP_002562740.1|	-	Bypass of stop codon protein 6
g115	contig_17	474805	476510	+	gi|255943947|ref|XP_002562741.1|	GO:0004553	Beta-xylosidase
g116	contig_17	478681	479128	+	gi|358376039|dbj|GAA92610.1|	-	-	-
g117	contig_17	481734	482125	-	gi|119483934|ref|XP_001261870.1|	GO:0016491	Aldehyde dehydrogenase [NAD(P)+] 2	KOG2450
g118	contig_17	482450	484138	-	gi|242767329|ref|XP_002341348.1|	GO:0005515	Putative ankyrin repeat protein FPV162	KOG4177
g119	contig_17	486815	487485	-	gi|525588434|gb|EPS34684.1|	GO:0016491	C-factor	KOG1611
g120	contig_17	488827	489196	+	-	-	-	-
g121	contig_17	491036	497326	-	gi|584406974|emb|CDM37282.1|	GO:0005515	Ankyrin repeat domain-containing protein 50	KOG0504
g122	contig_17	498001	498786	+	gi|576993860|gb|EUC66526.1|	-	Translationally-controlled tumor protein homolog	KOG1727
g123	contig_17	499642	501029	-	gi|225559733|gb|EEH08015.1|	-	Vegetative incompatibility protein HET-E-1	KOG0271
g124	contig_17	504116	504458	+	gi|317157575|ref|XP_003190857.1|	-	-	-
g125	contig_17	507738	509518	-	gi|255938213|ref|XP_002559877.1|	GO:0020037	Pisatin demethylase	KOG0157
g126	contig_17	510204	511808	+	gi|425769315|gb|EKV07811.1|	-	-	-
g127	contig_17	514025	515046	-	gi|494826781|gb|EON63808.1|	GO:0016491	Gluconate 5-dehydrogenase	KOG1207
g128	contig_17	516021	517117	+	gi|584410200|emb|CDM34225.1|	GO:0016491	Protein TOXD	KOG1198
g129	contig_17	518110	518988	+	gi|255931773|ref|XP_002557443.1|	-	-	-
g130	contig_17	519670	520561	+	gi|255943949|ref|XP_002562742.1|	-	-	-
g131	contig_17	520760	524310	-	gi|317146460|ref|XP_003189809.1|	GO:0051287	Histidinol dehydrogenase 1	KOG2697
g132	contig_17	524686	526080	-	gi|584417219|emb|CDM28929.1|	-	-	-
g133	contig_17	526980	527451	+	gi|408389512|gb|EKJ68959.1|	-	-	-
g134	contig_17	528396	530171	-	gi|255939910|ref|XP_002560724.1|	GO:0022857	Myo-inositol transporter 1	KOG0254
g135	contig_17	531497	533050	+	gi|599160847|gb|EYE99797.1|	GO:0020037	Benzoate 4-monooxygenase	KOG0157
g136	contig_17	534115	538150	-	gi|525580970|gb|EPS27220.1|	GO:0008270	Early growth response protein 1	KOG1721
g137	contig_17	538722	539679	+	gi|525580969|gb|EPS27219.1|	GO:0016491	4,5-DOPA dioxygenase extradiol-like protein
g138	contig_17	540430	544066	-	gi|255954687|ref|XP_002568096.1|	GO:0046872	P-type cation-transporting ATPase	KOG0207
g139	contig_17	545657	548358	-	gi|255943921|ref|XP_002562728.1|	GO:0003677	Protein sak1	KOG3712
g140	contig_17	549545	552484	+	gi|255943919|ref|XP_002562727.1|	GO:0003824	Phospholipase D1	KOG1329
g141	contig_17	555734	557418	-	gi|425766380|gb|EKV04993.1|	-	Ribose-phosphate pyrophosphokinase 1	KOG1448
g142	contig_17	557562	558368	+	gi|255943913|ref|XP_002562724.1|	-	Siroheme biosynthesis protein met8	KOG1527
g143	contig_17	558518	564389	-	gi|255943911|ref|XP_002562723.1|	GO:0005086	Protein transport protein SEC7	KOG0929
g144	contig_17	564785	566406	+	gi|525580960|gb|EPS27210.1|	GO:0008415	Dihydrolipoyllysine-residue acetyltransferase component of pyruvate dehydrogenase complex, mitochondrial	KOG0557
g145	contig_17	566947	567627	+	gi|525580959|gb|EPS27209.1|	-	-	-
g146	contig_17	568136	569015	+	gi|584416507|emb|CDM28212.1|	-	Protein transport protein bos1	KOG3251
g147	contig_17	569664	570831	+	gi|425766374|gb|EKV04987.1|	GO:0016491	Malate dehydrogenase, mitochondrial	KOG1494
g148	contig_17	571095	573955	-	gi|425766373|gb|EKV04986.1|	GO:0005524	-	-
g149	contig_17	575146	576807	+	gi|425766371|gb|EKV04984.1|	-	-	-
g150	contig_17	577221	579746	-	gi|255943899|ref|XP_002562717.1|	-	Target of rapamycin complex 2 subunit bit61
g151	contig_17	580577	580852	+	gi|255943897|ref|XP_002562716.1|	-	-	-
g152	contig_17	581143	584147	-	gi|255943895|ref|XP_002562715.1|	GO:0005083	Vam6/Vps39-like protein	KOG2063
g153	contig_17	584508	585945	-	gi|255943893|ref|XP_002562714.1|	GO:0005524	Fructose-2,6-bisphosphatase	KOG0234
g154	contig_17	586670	587672	-	gi|255943891|ref|XP_002562713.1|	GO:0003676	29 kDa ribonucleoprotein B, chloroplastic	KOG0118
g155	contig_17	588972	592756	-	gi|119482507|ref|XP_001261282.1|	GO:0005524	Nephrocystin-3	KOG1840
g156	contig_17	595695	599759	-	gi|255938548|ref|XP_002560044.1|	GO:0016787	Hydantoin utilization protein A	KOG1939
g157	contig_17	600365	601920	+	gi|584411592|emb|CDM30355.1|	-	N amino acid transport system protein
g158	contig_17	602830	604255	+	gi|169777825|ref|XP_001823378.1|	-	-	-
g159	contig_17	608389	608837	-	gi|584414591|emb|CDM26279.1|	-	-	-
g160	contig_17	610151	611677	-	gi|539432932|gb|ERF69763.1|	-	-	-
g161	contig_17	611905	614609	+	gi|255934967|ref|XP_002558510.1|	GO:0005524	Kinesin light chain	KOG1840
g162	contig_17	616804	617655	+	gi|398393542|ref|XP_003850230.1|	-	-	-
g163	contig_17	617831	618644	-	gi|115399688|ref|XP_001215447.1|	-	-	-
g164	contig_17	620644	621501	-	gi|119499299|ref|XP_001266407.1|	GO:0004616	Glyoxylate/succinic semialdehyde reductase 1	KOG0409
g165	contig_17	624544	628806	+	gi|67526171|ref|XP_661147.1|	GO:0005515	Ankyrin repeat domain-containing protein 50	KOG4177
g166	contig_17	631445	631978	-	gi|358372817|dbj|GAA89418.1|	-	-	-
g167	contig_17	633067	634747	+	gi|115443476|ref|XP_001218545.1|	-	Vegetative incompatibility protein HET-E-1	KOG0271
g168	contig_17	635634	636516	-	gi|255932939|ref|XP_002557940.1|	-	-	-
g169	contig_17	636758	637884	+	gi|169782411|ref|XP_001825668.1|	-	-	-
g170	contig_17	639014	639856	-	gi|317141163|ref|XP_001817537.2|	GO:0005515	-	-
g171	contig_17	640370	641197	+	gi|317141163|ref|XP_001817537.2|	GO:0005515	Ankyrin repeat and SOCS box protein 5
g172	contig_17	642520	644501	+	gi|115401374|ref|XP_001216275.1|	GO:0020037	Probable sterigmatocystin biosynthesis P450 monooxygenase stcS	KOG0157
g173	contig_17	647191	648189	-	gi|255946594|ref|XP_002564064.1|	GO:0003824	Putative branched-chain-amino-acid aminotransferase	KOG0975
g174	contig_17	648595	649924	+	gi|317137618|ref|XP_001727840.2|	GO:0016491	D-amino-acid oxidase	KOG3923
g175	contig_17	651132	652292	+	gi|584409195|emb|CDM36113.1|	GO:0016787	Probable carboxylesterase 15
g176	contig_17	653009	654297	+	gi|599151936|gb|EYE91347.1|	-	Choline transport protein	KOG1289
g177	contig_17	657889	658698	-	gi|525587989|gb|EPS34239.1|	-	Putative acetyltransferase C18B11.09c	KOG4750
g178	contig_17	659104	660835	-	gi|573991847|ref|XP_006673844.1|	-	Monoamine oxidase N	KOG0029
g179	contig_17	661159	661614	+	gi|591485339|gb|EXM15235.1|	-	-	-
g180	contig_17	662620	664102	+	gi|557723642|dbj|GAD97659.1|	-	Uncharacterized protein Rv1367c/MT1414
g181	contig_17	665152	666110	+	gi|573057860|gb|ETS77697.1|	GO:0016491	Uncharacterized oxidoreductase MexAM1_META1p0182	KOG0725
g182	contig_17	667069	668173	+	gi|119488177|ref|XP_001262631.1|	GO:0050662	Tetraketide alpha-pyrone reductase 2	KOG1502
g183	contig_17	669228	670070	+	gi|189196682|ref|XP_001934679.1|	-	Poly(3-hydroxyalkanoate) depolymerase
g184	contig_17	671200	675713	-	gi|242816729|ref|XP_002486804.1|	-	Vegetative incompatibility protein HET-E-1	KOG0271
g185	contig_17	678491	679159	+	gi|115399784|ref|XP_001215481.1|	-	Uncharacterized protein AN7484
g186	contig_17	681339	683599	+	gi|255943887|ref|XP_002562711.1|	GO:0020037	Sterol 14-alpha demethylase	KOG0684
g187	contig_17	684693	685777	+	gi|255943883|ref|XP_002562709.1|	GO:0003824	2,3-dihydroxybenzoate decarboxylase	KOG4245
g188	contig_17	686057	687173	-	gi|425766474|gb|EKV05084.1|	-	-	-
g189	contig_17	687534	688332	-	gi|255943879|ref|XP_002562707.1|	-	E3 ubiquitin-protein ligase MARCH11
g190	contig_17	688557	689586	+	gi|584416481|emb|CDM28184.1|	GO:0004298	Probable proteasome subunit alpha type-2	KOG0181
g191	contig_17	689969	690943	+	gi|255943875|ref|XP_002562705.1|	-	-	-
g192	contig_17	691020	692455	-	gi|255943873|ref|XP_002562704.1|	-	DNA repair protein rhp55	KOG1433
g193	contig_17	692645	693919	+	gi|255943871|ref|XP_002562703.1|	GO:0030170	Uncharacterized protein YcbX	KOG2362
g194	contig_17	694305	699121	+	gi|584417628|emb|CDM29340.1|	GO:0005515	Ankyrin repeat domain-containing protein 50	KOG0502
g195	contig_17	699577	701490	-	gi|425766466|gb|EKV05076.1|	GO:0005215	Purine permease	KOG1292
g196	contig_17	703349	704771	+	gi|255943863|ref|XP_002562699.1|	GO:0020037	Acyl-CoA desaturase	KOG0537
g197	contig_17	706124	709536	-	gi|255941436|ref|XP_002561487.1|	GO:0030246	Acid trehalase	KOG4125
g198	contig_17	710853	714339	+	gi|576044290|ref|XP_006696018.1|	-	Probable NAD(P)H-dependent D-xylose reductase xyl1	KOG1577
g199	contig_17	714779	715693	-	gi|573054707|gb|ETS74642.1|	-	Low-density lipoprotein receptor-related protein 6	KOG1215
g200	contig_17	716393	717072	+	gi|407916103|gb|EKG09525.1|	-	-	-
g201	contig_17	718193	718741	-	gi|494824330|gb|EON61621.1|	-	-	-
g202	contig_17	719806	720985	-	gi|119490274|ref|XP_001263009.1|	GO:0016787	Arylacetamide deacetylase	KOG1515
g203	contig_17	721255	725003	+	gi|242795697|ref|XP_002482645.1|	GO:0005524	Kinesin light chain	KOG1840
g204	contig_17	725496	727715	+	gi|255943861|ref|XP_002562698.1|	GO:0004222	Saccharolysin	KOG2089
g205	contig_17	728151	728696	+	gi|255943859|ref|XP_002562697.1|	-	-	-
g206	contig_17	728899	729582	-	gi|255943857|ref|XP_002562696.1|	-	Myosin regulatory light chain cdc4	KOG0027
g207	contig_17	729970	732294	-	gi|255943855|ref|XP_002562695.1|	GO:0008270	Zinc finger protein klf1	KOG1721
g208	contig_17	734300	737478	+	gi|350639534|gb|EHA27888.1|	-	-	-
g209	contig_17	738177	741335	-	gi|255943853|ref|XP_002562694.1|	-	Uncharacterized protein C11G11.07	KOG2081
g210	contig_17	741526	741886	+	gi|584416469|emb|CDM28172.1|	-	Small nuclear ribonucleoprotein E	KOG1774
g211	contig_17	741920	742647	-	gi|425766458|gb|EKV05068.1|	GO:0030272	5-formyltetrahydrofolate cyclo-ligase	KOG3093
g212	contig_17	743108	743589	+	gi|584416467|emb|CDM28170.1|	-	Protein rot1
g213	contig_17	743708	744295	-	gi|255943845|ref|XP_002562690.1|	-	Altered inheritance of mitochondria protein 41, mitochondrial
g214	contig_17	744549	748771	+	gi|255943843|ref|XP_002562689.1|	-	Probable nucleoporin C890.06	KOG1900
g215	contig_17	749025	750193	-	gi|255943841|ref|XP_002562688.1|	GO:0016491	Alpha-ketoglutarate-dependent sulfonate dioxygenase
g216	contig_17	751060	752002	+	gi|584416463|emb|CDM28166.1|	-	Uncharacterized protein C56F8.07	KOG0012
g217	contig_17	752192	753591	-	gi|584416462|emb|CDM28165.1|	GO:0005515	DNA damage-inducible protein 1	KOG0012
g218	contig_17	754540	756783	-	gi|525583042|gb|EPS29292.1|	GO:0016831	3-hydroxybenzoate 6-hydroxylase 1
g219	contig_17	757011	758891	+	gi|525583041|gb|EPS29291.1|	GO:0008239	Cocaine esterase
g220	contig_17	759276	759857	+	gi|525583040|gb|EPS29290.1|	-	-	-
g221	contig_17	761103	762740	+	gi|525583039|gb|EPS29289.1|	GO:0016491	Aldehyde dehydrogenase family 3 member B1
g222	contig_17	767100	767891	+	gi|119481957|ref|XP_001261007.1|	-	-	-
g223	contig_17	769015	770781	-	gi|584416460|emb|CDM28163.1|	-	-	-
g224	contig_17	771797	773124	+	gi|255943833|ref|XP_002562684.1|	GO:0003824	DNA damage tolerance protein RHC31	KOG2014
g225	contig_17	773437	775101	-	gi|584416458|emb|CDM28161.1|	-	Protein YTP1
g226	contig_17	775411	775863	+	gi|121712664|ref|XP_001273943.1|	-	Mating-type switching protein swi5
g227	contig_17	776279	780366	-	gi|255943827|ref|XP_002562681.1|	GO:0042626	Leptomycin B resistance protein pmd1	KOG0055
g228	contig_17	782907	783637	-	gi|525581056|gb|EPS27306.1|	-	E3 ubiquitin ligase complex SCF subunit sconC	KOG1724
g229	contig_17	784498	786375	+	gi|584416448|emb|CDM28151.1|	GO:0016757	GPI mannosyltransferase 4	KOG4123
g230	contig_17	787487	788919	-	gi|425766442|gb|EKV05052.1|	GO:0005515	UV excision repair protein rhp23	KOG0011
g231	contig_17	790309	791469	+	gi|255943813|ref|XP_002562674.1|	-	-	-
g232	contig_17	793000	795542	+	gi|425766440|gb|EKV05050.1|	-	-	-
g233	contig_17	798898	800034	+	gi|525581061|gb|EPS27311.1|	GO:0043022	Eukaryotic translation initiation factor 6	KOG3185
g234	contig_17	800843	803681	-	gi|425766575|gb|EKV05181.1|	GO:0018024	Histone-lysine N-methyltransferase, H3 lysine-36 specific	KOG4442
g235	contig_17	805629	806507	+	gi|255943805|ref|XP_002562670.1|	-	-	-
g236	contig_17	807990	810751	-	gi|584416441|emb|CDM28143.1|	GO:0005524	Calcium/calmodulin-dependent protein kinase kinase 1	KOG0585
g237	contig_17	811036	811729	+	gi|255943801|ref|XP_002562668.1|	-	Transport protein particle subunit bet5	KOG3368
g238	contig_17	815077	816735	+	gi|584416438|emb|CDM28140.1|	GO:0005524	Serine/threonine-protein kinase hal4	KOG0590
g239	contig_17	818734	819405	-	gi|400602020|gb|EJP69645.1|	GO:0016638	Pyridoxine/pyridoxamine 5'-phosphate oxidase	KOG2586
g240	contig_17	820136	821242	+	gi|584416437|emb|CDM28139.1|	GO:0005515	Protein hob3	KOG3771
g241	contig_17	821495	822139	-	gi|425766568|gb|EKV05174.1|	GO:0004045	Probable peptidyl-tRNA hydrolase	KOG2255
g242	contig_17	823138	825173	+	gi|255943765|ref|XP_002562650.1|	-	Calcium influx-promoting protein ehs1
g243	contig_17	828116	829585	-	gi|255943769|ref|XP_002562652.1|	-	Protein DGCR14	KOG2627
g244	contig_17	830093	832329	-	gi|255943773|ref|XP_002562654.1|	-	-	-
g245	contig_17	835107	836105	-	-	-	-	-
g246	contig_17	840282	845567	-	gi|115438446|ref|XP_001218068.1|	GO:0008415	Tetratricopeptide repeat protein 1	KOG2002
g247	contig_17	846056	850517	+	gi|255943785|ref|XP_002562660.1|	GO:0005524	Serine/threonine-protein kinase CLA4	KOG0578
g248	contig_17	851499	853640	-	gi|255943789|ref|XP_002562662.1|	-	-	-
g249	contig_17	853857	855888	-	gi|584416433|emb|CDM28135.1|	GO:0005524	Glycine--tRNA ligase 1, mitochondrial	KOG2298
g250	contig_17	856259	857545	+	gi|255943791|ref|XP_002562663.1|	-	Ribosome production factor 1	KOG2780
g251	contig_17	857717	858777	-	gi|573063473|gb|ETS83124.1|	-	-	-
g252	contig_17	860199	861140	+	gi|584415085|emb|CDM26777.1|	GO:0008168	Putative methyltransferase DDB_G0268948	KOG3010
g253	contig_17	861532	863531	-	gi|255943763|ref|XP_002562649.1|	GO:0046873	Putative metal ion transporter C27B12.12c
g254	contig_17	864783	865974	+	gi|425766612|gb|EKV05216.1|	GO:0016301	Homoserine kinase	KOG1537
g255	contig_17	866559	866993	+	gi|584416417|emb|CDM28119.1|	GO:0008233	Probable signal peptidase complex subunit 1	KOG4112
g256	contig_17	867285	867791	-	gi|584416416|emb|CDM28118.1|	-	RING-box protein 1A	KOG2930
g257	contig_17	868396	869775	+	gi|584416415|emb|CDM28117.1|	-	-	-
g258	contig_17	871264	872906	+	gi|255943751|ref|XP_002562643.1|	-	Glucan synthesis regulatory protein
g259	contig_17	873320	874015	-	gi|425766606|gb|EKV05210.1|	-	Thioredoxin domain-containing protein plp1	KOG1672
g260	contig_17	874746	876060	+	gi|584416410|emb|CDM28112.1|	-	GDP-mannose transporter	KOG1444
g261	contig_17	876745	878146	+	gi|255943743|ref|XP_002562639.1|	-	UPF0617 protein C1919.13c	KOG4174
g262	contig_17	878309	879700	-	gi|255943741|ref|XP_002562638.1|	-	Protein fyv10	KOG0396
g263	contig_17	880067	881604	-	gi|255943739|ref|XP_002562637.1|	GO:0003723	Centromere/microtubule-binding protein cbf5	KOG2529
g264	contig_17	881933	883201	-	gi|255943737|ref|XP_002562636.1|	-	Derlin-1	KOG0858
g265	contig_17	883492	884616	-	gi|584416405|emb|CDM28107.1|	-	Hydroxyacyl-thioester dehydratase type 2, mitochondrial
g266	contig_17	884802	885821	+	gi|255943733|ref|XP_002562634.1|	GO:0004664	P-protein	KOG2797
g267	contig_17	886129	888006	-	gi|584416403|emb|CDM28105.1|	-	Eukaryotic peptide chain release factor subunit 1	KOG0688
g268	contig_17	888869	890992	+	gi|255943729|ref|XP_002562632.1|	-	Vacuolar amino acid transporter 1	KOG1303
g269	contig_17	891105	891956	-	gi|255943727|ref|XP_002562631.1|	-	UPF0657 nucleolar protein C630.10
g270	contig_17	892298	893204	+	gi|358373324|dbj|GAA89923.1|	GO:0003735	60S ribosomal protein L25	KOG1751
g271	contig_17	893956	894370	-	gi|255943723|ref|XP_002562629.1|	-	Mitochondrial import inner membrane translocase subunit TIM8	KOG3489
g272	contig_17	894642	895242	+	gi|255943721|ref|XP_002562628.1|	-	Pre-mRNA-splicing factor cwf14	KOG3404
g273	contig_17	895865	897958	-	gi|255943719|ref|XP_002562627.1|	GO:0043565	Forkhead protein sep1	KOG2294
g274	contig_17	899431	901169	-	gi|255943717|ref|XP_002562626.1|	GO:0016597	Aspartokinase	KOG0456
g275	contig_17	901820	903391	+	gi|425766589|gb|EKV05193.1|	-	Zinc finger with UFM1-specific peptidase domain protein	KOG4696
g276	contig_17	903853	904563	+	gi|255943709|ref|XP_002562622.1|	-	Putative adenylate kinase FAP7	KOG3347
g277	contig_17	904643	905466	-	gi|255943707|ref|XP_002562621.1|	GO:0016787	Inosine triphosphate pyrophosphatase	KOG3222
g278	contig_17	905815	910816	-	gi|255943703|ref|XP_002562619.1|	GO:0005524	Myosin-2	KOG0160
g279	contig_17	911434	912908	-	gi|255943701|ref|XP_002562618.1|	-	Putative nucleosome assembly protein C364.06	KOG1507
g280	contig_17	914597	919551	+	gi|425766585|gb|EKV05189.1|	GO:0046872	Probable cation-transporting ATPase C1672.11c	KOG0208
g281	contig_17	920700	922527	+	gi|255943697|ref|XP_002562616.1|	GO:0005524	Serine/threonine-protein kinase bur1	KOG0600
g282	contig_17	922907	924622	-	gi|255943695|ref|XP_002562615.1|	GO:0051287	D-3-phosphoglycerate dehydrogenase 1	KOG0068
g283	contig_17	925032	926770	-	gi|584416386|emb|CDM28087.1|	GO:0005524	Serine--tRNA ligase, cytoplasmic	KOG2509
g284	contig_17	927295	928038	-	gi|255943687|ref|XP_002562611.1|	-	GTP-binding protein rhb1	KOG0395
g285	contig_17	928553	931067	-	gi|255943685|ref|XP_002562610.1|	-	-	-
g286	contig_17	931605	932513	+	gi|425766703|gb|EKV05304.1|	-	Uracil phosphoribosyltransferase	KOG4203
g287	contig_17	932818	933360	-	gi|425766702|gb|EKV05303.1|	-	Transcription elongation factor 1 homolog	KOG3214
g288	contig_17	933973	935037	+	gi|425766701|gb|EKV05302.1|	GO:0003735	40S ribosomal protein S1	KOG1628
g289	contig_17	971467	971972	+	gi|525587880|gb|EPS34130.1|	-	ATPase-stabilizing factor 15 kDa protein
g290	contig_17	972317	976497	-	gi|584416379|emb|CDM28080.1|	-	Nucleoporin nup132	KOG4121
g291	contig_17	977261	978517	+	gi|255943673|ref|XP_002562604.1|	-	Malonyl CoA-acyl carrier protein transacylase	KOG2926
g292	contig_17	979955	980809	+	gi|584416376|emb|CDM28077.1|	GO:0051539	NADH-ubiquinone oxidoreductase 19.3 kDa subunit, mitochondrial	KOG1687
g293	contig_17	981242	982329	-	gi|255943655|ref|XP_002562595.1|	GO:0016491	Uncharacterized oxidoreductase C4H3.08	KOG0725
g294	contig_17	983145	985244	+	gi|584416369|emb|CDM28070.1|	-	U3 small nucleolar RNA-associated protein MPP10	KOG2600
g295	contig_17	985333	986096	-	gi|584416370|emb|CDM28071.1|	-	Uncharacterized protein YNL024C	KOG2793
g296	contig_17	986859	987423	-	gi|557725871|dbj|GAD95460.1|	-	UPF0591 membrane protein C15E1.02c
g297	contig_17	988407	991960	-	gi|255943663|ref|XP_002562599.1|	GO:0016491	NADH-ubiquinone oxidoreductase 21.3 kDa subunit
g298	contig_17	992367	992997	+	gi|255943651|ref|XP_002562593.1|	-	Protein UPS2, mitochondrial	KOG3336
g299	contig_17	993402	994413	-	gi|255943649|ref|XP_002562592.1|	-	-	-
g300	contig_17	994744	996258	+	gi|425766686|gb|EKV05287.1|	GO:0016779	Ethanolamine-phosphate cytidylyltransferase	KOG2803
g301	contig_17	996570	997158	-	gi|255943645|ref|XP_002562590.1|	GO:0015035	Monothiol glutaredoxin-5, mitochondrial	KOG0911
g302	contig_17	997502	998746	-	gi|255943641|ref|XP_002562588.1|	GO:0004659	4-hydroxybenzoate polyprenyltransferase, mitochondrial	KOG1381
g303	contig_17	999438	1001844	+	gi|425766682|gb|EKV05283.1|	-	-	-
g304	contig_17	1002084	1002737	-	gi|255943637|ref|XP_002562586.1|	-	-	-
g305	contig_17	1002885	1003526	+	gi|255943635|ref|XP_002562585.1|	-	Cytochrome c oxidase assembly protein 1
g306	contig_17	1003775	1004735	-	gi|255943633|ref|XP_002562584.1|	GO:0003735	54S ribosomal protein L9, mitochondrial	KOG3141
g307	contig_17	1005103	1005907	+	gi|255943631|ref|XP_002562583.1|	-	Uncharacterized protein C106.07c	KOG4526
g308	contig_17	1006303	1010884	-	gi|255943629|ref|XP_002562582.1|	GO:0008889	Ankyrin repeat protein nuc-2	KOG1161
g309	contig_17	1010934	1012160	-	gi|425766676|gb|EKV05277.1|	-	Uncharacterized serine-rich protein C11G7.01
g310	contig_17	1013233	1015221	-	gi|255943625|ref|XP_002562580.1|	-	-	-
g311	contig_17	1018523	1021654	-	gi|255943623|ref|XP_002562579.1|	-	-	-
g312	contig_17	1025032	1027738	+	gi|425766673|gb|EKV05274.1|	GO:0016887	Protein GCN20	KOG0062
g313	contig_17	1028233	1031952	+	gi|255943619|ref|XP_002562577.1|	GO:0022857	Myo-inositol transporter 1	KOG0254
g314	contig_17	1032230	1033497	-	gi|255943615|ref|XP_002562575.1|	-	Protein transport protein sec13	KOG1332
g315	contig_17	1033794	1034788	+	gi|584416346|emb|CDM28047.1|	-	-	-
g316	contig_17	1035519	1038112	+	gi|594715913|gb|EXU98820.1|	GO:0016491	UPF0676 protein C1494.01	KOG0143
g317	contig_17	1038411	1041029	+	gi|399166668|emb|CCE32499.1|	GO:0016810	Glutamine-dependent NAD(+) synthetase
g318	contig_17	1042829	1044325	-	gi|599157257|gb|EYE96366.1|	-	Uncharacterized protein YEL023C
g319	contig_17	1045139	1049905	+	gi|599157256|gb|EYE96365.1|	GO:0020037	Psi-producing oxygenase A	KOG2408
g320	contig_17	1051397	1052947	-	gi|67901964|ref|XP_681238.1|	GO:0020037	Pisatin demethylase	KOG0158
g321	contig_17	1054185	1054611	+	gi|255945533|ref|XP_002563534.1|	-	-	-
g322	contig_17	1056331	1058763	+	gi|255952755|ref|XP_002567130.1|	GO:0016832	Probable phosphoketolase 1
g323	contig_17	1059907	1061902	-	gi|255949640|ref|XP_002565587.1|	-	Chromatin structure-remodeling complex subunit sfh1	KOG1649
g324	contig_17	1062618	1070141	-	gi|599154290|gb|EYE93548.1|	GO:0008239	Probable dipeptidyl peptidase 3	KOG3675
g325	contig_17	1070759	1072167	+	gi|255949648|ref|XP_002565591.1|	GO:0003824	Branched-chain-amino-acid aminotransferase, mitochondrial	KOG0975
g326	contig_17	1072624	1073995	-	gi|527293778|gb|EPS94654.1|	GO:0022857	Sugar transporter STL1	KOG0254
g327	contig_17	1079192	1080207	+	gi|584416332|emb|CDM28033.1|	-	-	-
g328	contig_17	1084874	1085989	-	gi|255949654|ref|XP_002565594.1|	GO:0019887	Casein kinase II subunit beta-1	KOG3092
g329	contig_17	1086922	1091770	-	gi|425766709|gb|EKV05309.1|	GO:0050661	Uncharacterized monooxygenase y4iD
g330	contig_17	1092210	1093232	+	gi|584416328|emb|CDM28029.1|	-	Lysine-specific demethylase 8	KOG2132
g331	contig_17	1094241	1095089	+	gi|255949662|ref|XP_002565598.1|	-	-	-
g332	contig_17	1095537	1098049	-	gi|255949664|ref|XP_002565599.1|	-	General amino acid permease AGP2	KOG1286
g333	contig_17	1099554	1100109	+	gi|425781539|gb|EKV19499.1|	GO:0020037	Probable steroid-binding protein 3	KOG1110
g334	contig_17	1100343	1102499	-	gi|425781538|gb|EKV19498.1|	GO:0003676	Uncharacterized RNA-binding protein C4F6.14	KOG0127
g335	contig_17	1102671	1103642	+	gi|255949672|ref|XP_002565603.1|	GO:0004519	Mating-type switching protein swi10	KOG2841
g336	contig_17	1106014	1106464	+	gi|425768312|gb|EKV06839.1|	-	Terrelysin
g337	contig_17	1107437	1108127	-	-	-	-	-
g338	contig_17	1110812	1114360	+	gi|119482507|ref|XP_001261282.1|	GO:0005524	Nephrocystin-3	KOG1840
g339	contig_17	1116784	1117566	-	gi|119474427|ref|XP_001259089.1|	-	Putative acetyltransferase C18B11.09c	KOG4750
g340	contig_17	1119606	1120967	+	gi|584416317|emb|CDM28018.1|	-	Lipase B
g341	contig_17	1121471	1123064	-	gi|425781531|gb|EKV19491.1|	-	Sphingosine N-acyltransferase lag1	KOG1607
g342	contig_17	1123568	1124741	-	gi|584416315|emb|CDM28016.1|	-	-	-
g343	contig_17	1125153	1126040	-	gi|584416314|emb|CDM28015.1|	-	-	-
g344	contig_17	1127889	1128953	-	gi|255949690|ref|XP_002565612.1|	-	-	-
g345	contig_17	1129296	1130082	+	gi|255949692|ref|XP_002565613.1|	-	Protein get1	KOG4253
g346	contig_17	1131168	1132631	-	gi|425781525|gb|EKV19485.1|	GO:0003676	Uncharacterized RNA-binding protein C1827.05c	KOG4208
g347	contig_17	1132804	1133426	+	gi|584416309|emb|CDM28010.1|	GO:0003723	Survival motor neuron-like protein 1	KOG4327
g348	contig_17	1133769	1134238	-	gi|255949700|ref|XP_002565617.1|	-	-	-
g349	contig_17	1136985	1138130	+	gi|425781521|gb|EKV19481.1|	-	-	-
g350	contig_17	1138280	1139728	-	gi|255949706|ref|XP_002565620.1|	GO:0016747	Non-specific lipid-transfer protein	KOG1406
g351	contig_17	1141545	1142838	+	gi|425781519|gb|EKV19479.1|	-	Uncharacterized mitochondrial carrier C29A3.11c	KOG0758
g352	contig_17	1143207	1146097	+	gi|255949712|ref|XP_002565623.1|	-	pH-response regulator protein palA/RIM20	KOG2220
g353	contig_17	1146672	1148225	-	gi|255949714|ref|XP_002565624.1|	-	Sphingosine N-acyltransferase LAG1	KOG1607
g354	contig_17	1148574	1149224	-	gi|575848428|emb|CDL81813.1|	GO:0005515	Glutathione S-transferase GstB_x0001_sp|P0ACA7.1|GSTB_ECOLI RecName: Full=Glutathione S-transferase GstB_x0001_sp|P0ACA9.1|GSTB_SHIFL RecName: Full=Glutathione S-transferase GstB
g355	contig_17	1150214	1152723	-	gi|557721321|dbj|GAD99832.1|	GO:0048037	Linear gramicidin synthase subunit D	KOG1178
g356	contig_17	1159744	1161448	+	gi|67524869|ref|XP_660496.1|	GO:0022857	General alpha-glucoside permease	KOG0254
g357	contig_17	1161607	1164386	-	gi|347837995|emb|CCD52567.1|	GO:0008270	Early growth response protein 1-A	KOG1721
g358	contig_17	1165204	1167117	+	gi|145256095|ref|XP_001402422.1|	-	-	-
g359	contig_17	1167717	1168649	+	gi|255949726|ref|XP_002565630.1|	-	Putative glutamine amidotransferase-like protein C13C5.04	KOG3179
g360	contig_17	1169613	1170426	-	gi|391864572|gb|EIT73867.1|	GO:0016491	Uncharacterized oxidoreductase MexAM1_META1p0182	KOG0725
g361	contig_17	1171089	1172591	-	gi|317139087|ref|XP_001817261.2|	GO:0050660	6-hydroxy-D-nicotine oxidase
g362	contig_17	1172993	1174747	+	gi|317139089|ref|XP_003189126.1|	-	Uncharacterized MFS-type transporter C1271.10c	KOG0255
g363	contig_17	1175390	1176626	-	gi|599150747|gb|EYE90253.1|	GO:0030170	L-serine dehydratase	KOG1250
g364	contig_17	1179498	1180385	+	gi|169774475|ref|XP_001821705.1|	-	-	-
g365	contig_17	1183680	1185287	+	gi|255949736|ref|XP_002565635.1|	-	Choline transport protein	KOG1289
g366	contig_17	1187028	1187528	+	gi|255956467|ref|XP_002568986.1|	-	-	-
g367	contig_17	1187698	1189315	-	gi|255949738|ref|XP_002565636.1|	GO:0016491	Aldehyde dehydrogenase	KOG2450
g368	contig_17	1190280	1192441	+	gi|425781502|gb|EKV19462.1|	GO:0048038	Peroxisomal primary amine oxidase	KOG1186
g369	contig_17	1192801	1193745	-	gi|255949742|ref|XP_002565638.1|	GO:0048037	D-2-hydroxyacid dehydrogenase	KOG0069
g370	contig_17	1194478	1197324	-	gi|255949746|ref|XP_002565640.1|	GO:0008270	Uncharacterized transcriptional regulatory protein C1327.01c
g371	contig_17	1198283	1199308	-	gi|255949748|ref|XP_002565641.1|	-	Uncharacterized protein AFUA_5G13800
g372	contig_17	1199682	1201829	-	gi|584416281|emb|CDM27982.1|	GO:0003855	Pentafunctional AROM polypeptide	KOG0692
g373	contig_17	1203922	1207553	-	gi|584416280|emb|CDM27981.1|	-	DENN domain-containing protein 5B	KOG2080
g374	contig_17	1209598	1210866	-	gi|425781566|gb|EKV19524.1|	-	UPF0533 protein C5orf44 homolog	KOG2625
g375	contig_17	1211143	1212520	+	gi|317038456|ref|XP_001401448.2|	-	E3 ubiquitin-protein ligase Zswim2
g376	contig_17	1213182	1214642	-	gi|255949758|ref|XP_002565646.1|	-	Kinetochore protein mis15
g377	contig_17	1216914	1217435	+	gi|599150880|gb|EYE90370.1|	-	-	-
g378	contig_17	1219039	1220376	+	gi|584416269|emb|CDM27969.1|	GO:0046983	Regulatory protein cys-3
g379	contig_17	1220965	1222078	+	gi|255949768|ref|XP_002565651.1|	-	-	-
g380	contig_17	1224389	1225232	-	gi|576037416|ref|XP_006692581.1|	-	-	-
g381	contig_17	1226258	1226670	-	gi|154125579|gb|ABS59366.1|	-	Cryparin
g382	contig_17	1228370	1230149	-	gi|302895571|ref|XP_003046666.1|	-	Uncharacterized transporter C1529.01	KOG0255
g383	contig_17	1236846	1238774	+	gi|255949766|ref|XP_002565650.1|	-	Uncharacterized transporter C569.05c	KOG0255
g384	contig_17	1239750	1240782	-	gi|599150396|gb|EYE89969.1|	-	-	-
g385	contig_17	1242290	1243036	+	gi|115386812|ref|XP_001209947.1|	-	-	-
g386	contig_17	1246639	1248086	-	gi|425781597|gb|EKV19553.1|	-	-	-
g387	contig_17	1248955	1250008	+	-	-	-	-
g388	contig_17	1251232	1254992	+	gi|46105040|ref|XP_380324.1|	GO:0008270	Uncharacterized transporter C1002.16c	KOG2533
g389	contig_17	1256079	1257068	-	gi|358401675|gb|EHK50973.1|	GO:0003824	2,3-dimethylmalate lyase	KOG1260
g390	contig_17	1258270	1259995	+	gi|255949784|ref|XP_002565659.1|	GO:0020037	Pisatin demethylase	KOG0157
g391	contig_17	1260362	1261717	-	gi|255949786|ref|XP_002565660.1|	-	-	-
g392	contig_17	1262022	1264982	+	gi|584416260|emb|CDM27960.1|	GO:0005524	DNA mismatch repair protein MLH3	KOG1977
g393	contig_17	1268448	1271827	-	gi|255949790|ref|XP_002565662.1|	GO:0005085	Ras guanine nucleotide exchange factor A	KOG3417
g394	contig_17	1282069	1285416	-	gi|584416254|emb|CDM27954.1|	GO:0016455	Mediator of RNA polymerase II transcription subunit 5
g395	contig_17	1286075	1287650	-	gi|255949800|ref|XP_002565667.1|	GO:0016491	NADP-specific glutamate dehydrogenase	KOG2250
g396	contig_17	1293419	1294054	+	gi|425781580|gb|EKV19536.1|	-	-	-
g397	contig_17	1296772	1300350	-	gi|115387973|ref|XP_001211492.1|	-	Putative ankyrin repeat protein MM_0045
g398	contig_17	1301097	1304030	-	gi|584416249|emb|CDM27949.1|	-	L-fucose-proton symporter
g399	contig_17	1307604	1309241	-	gi|599155391|gb|EYE94594.1|	-	Circumsporozoite protein
g400	contig_17	1310237	1312626	+	gi|119176162|ref|XP_001240205.1|	-	Prolyl 4-hydroxylase subunit alpha-3	KOG1591
g401	contig_17	1313453	1314040	+	gi|156062622|ref|XP_001597233.1|	-	-	-
g402	contig_17	1318062	1320040	-	gi|589969970|gb|EXJ53385.1|	GO:0022857	Sugar transporter STL1	KOG0254
g403	contig_17	1320800	1322213	+	gi|587748710|gb|EXA46426.1|	-	-	-
g404	contig_17	1323132	1324757	-	gi|589969972|gb|EXJ53387.1|	GO:0020037	Benzoate 4-monooxygenase	KOG0158
g405	contig_17	1325620	1326675	+	gi|589986965|gb|EXJ69904.1|	-	Probable ribokinase	KOG2855
g406	contig_17	1335478	1337548	-	gi|212538777|ref|XP_002149544.1|	-	Vacuolar membrane amino acid uptake transporter fnx2	KOG0254
g407	contig_17	1338340	1340429	-	gi|525583260|gb|EPS29510.1|	GO:0008484	Arylsulfatase	KOG3731
g408	contig_17	1341397	1343332	+	gi|255951984|ref|XP_002566758.1|	-	Uncharacterized transporter YIL166C	KOG2533
g409	contig_17	1348352	1350346	+	gi|425781624|gb|EKV19578.1|	GO:0016787	Sphingomyelin phosphodiesterase	KOG3770
g410	contig_17	1350737	1354718	-	gi|255949816|ref|XP_002565675.1|	GO:0015105	6-hydroxynicotinate 3-monooxygenase
g411	contig_17	1356409	1358461	+	gi|255949814|ref|XP_002565674.1|	-	-	-
g412	contig_17	1359713	1360510	-	gi|525584920|gb|EPS31170.1|	-	Allergen Asp f 7
g413	contig_17	1362944	1365732	-	gi|255949828|ref|XP_002565681.1|	GO:0005524	Ribonucleoside-diphosphate reductase large chain	KOG1112
g414	contig_17	1367036	1367724	-	gi|255949830|ref|XP_002565682.1|	-	-	-
g415	contig_17	1368712	1369350	-	gi|584416236|emb|CDM27936.1|	-	Putative uridine kinase C227.14	KOG2702
g416	contig_17	1370570	1371841	-	gi|425781655|gb|EKV19607.1|	-	-	-
g417	contig_17	1372154	1373398	+	gi|584416234|emb|CDM27934.1|	GO:0005524	Probable folylpolyglutamate synthase	KOG2525
g418	contig_17	1374098	1378562	+	gi|425781652|gb|EKV19604.1|	GO:0005524	Cytokinesis protein sepH	KOG0198
g419	contig_17	1379291	1381117	+	gi|255949842|ref|XP_002565688.1|	-	ABC1 family protein C15C4.02	KOG1235
g420	contig_17	1381906	1382577	-	gi|425781650|gb|EKV19602.1|	GO:0051536	Iron sulfur cluster assembly protein 1, mitochondrial	KOG3361
g421	contig_17	1384212	1385044	-	gi|584416230|emb|CDM27930.1|	-	-	-
g422	contig_17	1386115	1387493	-	gi|584416227|emb|CDM27927.1|	-	Mannan polymerase II complex anp1 subunit
g423	contig_17	1389630	1390877	-	gi|425781646|gb|EKV19598.1|	-	-	-
g424	contig_17	1398171	1399405	-	gi|255949858|ref|XP_002565696.1|	-	Protein ecm33
g425	contig_17	1402901	1404019	-	gi|255939456|ref|XP_002560497.1|	-	-	-
g426	contig_17	1404564	1405784	+	gi|584416221|emb|CDM27921.1|	-	DNA-3-methyladenine glycosylase 1	KOG1918
g427	contig_17	1406264	1407040	-	gi|584416220|emb|CDM27920.1|	GO:0008121	Cytochrome b-c1 complex subunit 7	KOG3440
g428	contig_17	1407647	1408927	+	gi|425781641|gb|EKV19593.1|	-	Mitochondrial nicotinamide adenine dinucleotide transporter 1	KOG0764
g429	contig_17	1409687	1411099	-	gi|255939416|ref|XP_002560477.1|	-	-	-
g430	contig_17	1413604	1414707	-	gi|517324937|emb|CCT75071.1|	-	-	-
g431	contig_17	1415953	1416285	+	gi|238492617|ref|XP_002377545.1|	-	-	-
g432	contig_17	1418389	1419365	-	-	-	-	-
g433	contig_17	1423555	1425394	+	gi|255949866|ref|XP_002565700.1|	GO:0003676	DNA-damage-repair/toleration protein DRT111, chloroplastic	KOG1996
g434	contig_17	1425567	1426514	-	-	-	-	-
g435	contig_17	1427674	1428401	+	gi|255949870|ref|XP_002565702.1|	GO:0016881	SUMO-conjugating enzyme ubc9	KOG0424
g436	contig_17	1428815	1431037	+	gi|255949872|ref|XP_002565703.1|	GO:0004066	Asparagine synthetase [glutamine-hydrolyzing] 2	KOG0571
g437	contig_17	1431360	1432624	+	gi|255949874|ref|XP_002565704.1|	GO:0008308	Mitochondrial outer membrane protein porin	KOG3126
g438	contig_17	1432961	1434101	-	gi|584416212|emb|CDM27912.1|	GO:0031072	Chaperone protein DnaJ	KOG0712
g439	contig_17	1434853	1435899	+	gi|238483509|ref|XP_002372993.1|	GO:0018580	Nitronate monooxygenase
g440	contig_17	1436561	1437169	-	gi|345013678|ref|YP_004816032.1|	-	-	-
g441	contig_17	1438651	1440275	+	gi|584416209|emb|CDM27909.1|	-	Methionine aminopeptidase 2 homolog Pc22g18010	KOG2775
g442	contig_17	1440509	1442023	+	gi|255949888|ref|XP_002565711.1|	GO:0016705	Dihydroceramide delta(4)-desaturase	KOG2987
g443	contig_17	1442660	1443844	-	gi|255949890|ref|XP_002565712.1|	GO:0005198	Uncharacterized protein C17C9.12	KOG0439
g444	contig_17	1446514	1447563	+	gi|255949892|ref|XP_002565713.1|	-	UBX domain-containing protein 1	KOG2689
g445	contig_17	1447955	1449865	+	gi|425781682|gb|EKV19630.1|	-	DNA repair and recombination protein radC	KOG4141
g446	contig_17	1453783	1459529	-	gi|584416202|emb|CDM27902.1|	-	Vacuolar amino acid transporter 2	KOG1305
g447	contig_17	1462253	1463906	+	gi|255949904|ref|XP_002565719.1|	-	-	-
g448	contig_17	1464129	1465157	+	gi|584412750|emb|CDM31519.1|	GO:0016787	Putative metallophosphoesterase YNL217W	KOG0371
g449	contig_17	1467123	1470345	+	gi|255952302|ref|XP_002566917.1|	GO:0046872	Plasma membrane ATPase	KOG0205
g450	contig_17	1471033	1472006	-	gi|255945663|ref|XP_002563599.1|	-	Probable endo-beta-1,4-glucanase D
g451	contig_17	1473226	1474029	+	gi|255945665|ref|XP_002563600.1|	-	Feruloyl esterase C
g452	contig_17	1475694	1476913	-	gi|584416191|emb|CDM27891.1|	GO:0016888	Deoxyribonuclease Tat-D	KOG3020
g453	contig_17	1477755	1479429	+	gi|255949914|ref|XP_002565724.1|	GO:0020037	Cytochrome b2, mitochondrial	KOG0537
g454	contig_17	1480818	1481571	+	gi|255949916|ref|XP_002565725.1|	-	-	-
g455	contig_17	1484278	1485699	+	gi|584416188|emb|CDM27888.1|	GO:0004190	Aspartic-type endopeptidase ctsD	KOG1339
g456	contig_17	1486081	1487528	-	gi|584416187|emb|CDM27887.1|	GO:0016491	Uncharacterized lactate 2-monooxygenase PB1A11.03	KOG0538
g457	contig_17	1488961	1490582	+	gi|255949922|ref|XP_002565728.1|	-	Acyl-coenzyme A thioesterase 9, mitochondrial	KOG2763
g458	contig_17	1491509	1493601	-	gi|255949924|ref|XP_002565729.1|	-	-	-
g459	contig_17	1497593	1498922	+	gi|425781779|gb|EKV19725.1|	GO:0008138	Tyrosine-protein phosphatase yvh1	KOG1716
g460	contig_17	1502497	1503288	-	gi|255949932|ref|XP_002565733.1|	-	UPF0589 protein C32H8.01c
g461	contig_17	1503712	1505555	-	gi|255949934|ref|XP_002565734.1|	-	Nuclear envelope protein ndc1
g462	contig_17	1506250	1507126	+	gi|255949936|ref|XP_002565735.1|	GO:0005515	Syntaxin-22	KOG0811
g463	contig_17	1507482	1508330	-	gi|584416178|emb|CDM27878.1|	GO:0004408	Cytochrome c1 heme lyase	KOG3996
g464	contig_17	1508497	1509761	+	gi|255949940|ref|XP_002565737.1|	GO:0016301	Diphosphomevalonate decarboxylase	KOG2833
g465	contig_17	1511819	1516768	-	gi|584416176|emb|CDM27876.1|	GO:0004129	Elongator complex protein 1	KOG1920
g466	contig_17	1517085	1520412	+	gi|584416174|emb|CDM27874.1|	GO:0016818	ATP-dependent RNA helicase mtr4	KOG0948
g467	contig_17	1520828	1521830	+	gi|584416173|emb|CDM27873.1|	-	Tethering factor for nuclear proteasome sts1
g468	contig_17	1522966	1526101	-	gi|584416171|emb|CDM27871.1|	GO:0004497	6-hydroxynicotinate 3-monooxygenase	KOG2614
g469	contig_17	1526784	1527923	-	gi|425781757|gb|EKV19703.1|	GO:0016743	Ornithine carbamoyltransferase, mitochondrial	KOG1504
g470	contig_17	1528222	1531077	+	gi|255949956|ref|XP_002565745.1|	-	-	-
g471	contig_17	1531604	1532639	-	gi|584416168|emb|CDM27868.1|	GO:0016597	Acetolactate synthase small subunit, mitochondrial	KOG2663
g472	contig_17	1533068	1535107	+	gi|584416167|emb|CDM27867.1|	GO:0003723	Uncharacterized protein C30D11.14c	KOG1960
g473	contig_17	1535643	1537318	-	gi|255949962|ref|XP_002565748.1|	GO:0008026	ATP-dependent DNA helicase Q-like 3	KOG0351
g474	contig_17	1537691	1540072	-	gi|255949964|ref|XP_002565749.1|	-	-	-
g475	contig_17	1540488	1545339	+	gi|425781750|gb|EKV19696.1|	GO:0005515	37S ribosomal protein S25, mitochondrial	KOG0619
g476	contig_17	1547403	1549397	-	gi|425781747|gb|EKV19693.1|	-	Protein SOK1	KOG1981
g477	contig_17	1550660	1559189	+	gi|380490412|emb|CCF36031.1|	GO:0016884	Urea amidolyase	KOG1211
g478	contig_17	1559496	1562590	-	gi|525583212|gb|EPS29462.1|	GO:0008270	Transcriptional activator protein DAL81
g479	contig_17	1563823	1565151	+	gi|425781746|gb|EKV19692.1|	-	Cruciform cutting endonuclease 1, mitochondrial
g480	contig_17	1566044	1567409	-	gi|425781745|gb|EKV19691.1|	-	-	-
g481	contig_17	1568761	1569651	+	gi|255949988|ref|XP_002565761.1|	GO:0016779	Promoter of filamentation protein 1
g482	contig_17	1569891	1570375	-	gi|255949986|ref|XP_002565760.1|	-	-	-
g483	contig_17	1570854	1577319	+	gi|255949982|ref|XP_002565758.1|	GO:0034450	Ubiquitin conjugation factor E4	KOG2042
g484	contig_17	1577861	1579010	+	gi|255949980|ref|XP_002565757.1|	GO:0016627	Uncharacterized protein C9.08c	KOG1638
g485	contig_17	1580388	1582449	-	gi|584416150|emb|CDM27850.1|	-	-	-
g486	contig_17	1583181	1584471	+	gi|584416148|emb|CDM27848.1|	GO:0016491	Tyrosinase
g487	contig_17	1585226	1588041	-	gi|584415800|emb|CDM27498.1|	GO:0016491	Aryl-alcohol dehydrogenase
g488	contig_17	1588428	1590273	+	gi|584415798|emb|CDM27496.1|	-	Cholinesterase	KOG4389
g489	contig_17	1590595	1592005	-	gi|584416147|emb|CDM27847.1|	-	Probable inactive purple acid phosphatase 16	KOG1432
g490	contig_17	1593225	1595636	-	gi|584416145|emb|CDM27845.1|	GO:0008270	Probable 5-methyltetrahydropteroyltriglutamate--homocysteine methyltransferase	KOG2263
g491	contig_17	1596473	1598192	+	gi|584416144|emb|CDM27844.1|	-	Thiamine transporter thi9	KOG1289
g492	contig_17	1599330	1600298	+	gi|584416141|emb|CDM27841.1|	GO:0016491	Probable L-xylulose reductase	KOG1207
g493	contig_17	1603991	1609074	+	gi|255945359|ref|XP_002563447.1|	GO:0046556	Alpha-L-arabinofuranosidase axhA	KOG0197
g494	contig_17	1609229	1611759	-	gi|255945357|ref|XP_002563446.1|	GO:0022857	Galactose-proton symporter	KOG0254
g495	contig_17	1614456	1615642	+	gi|255945355|ref|XP_002563445.1|	GO:0046873	-	-
g496	contig_17	1619280	1620430	-	gi|315049607|ref|XP_003174178.1|	-	Mitochondrial phosphate carrier protein	KOG0767
g497	contig_17	1622705	1623617	+	gi|482809614|gb|EOA86423.1|	-	-	-
g498	contig_17	1625050	1626183	+	gi|119497453|ref|XP_001265485.1|	GO:0016491	Zinc-binding alcohol dehydrogenase domain-containing protein cipB
g499	contig_17	1637043	1638840	-	gi|255949372|ref|XP_002565453.1|	GO:0022857	Probable quinate permease	KOG0254
g500	contig_17	1639472	1641639	+	gi|557721848|dbj|GAD99335.1|	GO:0016491	L-pipecolate oxidase	KOG2820
g501	contig_17	1641924	1643209	-	gi|584406913|emb|CDM37218.1|	GO:0004553	Probable glycosidase C21B10.07
g502	contig_17	1646475	1648232	-	gi|255950992|ref|XP_002566263.1|	-	Uncharacterized MFS-type transporter C1399.02	KOG0254
g503	contig_17	1648638	1651289	-	gi|477525417|gb|ENH77306.1|	-	-	-
g504	contig_17	1653128	1663083	+	gi|255950998|ref|XP_002566266.1|	GO:0048037	Lovastatin nonaketide synthase	KOG1202
g505	contig_17	1664143	1665907	-	gi|425774469|gb|EKV12776.1|	-	Uncharacterized amino-acid permease C15C4.04c	KOG1289
g506	contig_17	1666894	1668284	+	gi|425774470|gb|EKV12777.1|	-	-	-
g507	contig_17	1676214	1680584	+	gi|159125206|gb|EDP50323.1|	-	-	-
g508	contig_17	1683062	1683571	+	gi|255940470|ref|XP_002561004.1|	GO:0005199	Spore-wall fungal hydrophobin dewA
g509	contig_17	1686312	1686805	+	gi|255938449|ref|XP_002559995.1|	GO:0005199	Spore-wall fungal hydrophobin dewA
g510	contig_17	1687415	1688614	-	gi|584414402|emb|CDM33180.1|	GO:0004553	Probable glycosidase crf1
g511	contig_17	1689326	1691047	-	gi|145237764|ref|XP_001391529.1|	-	Acetylcholinesterase	KOG4389
g512	contig_17	1693336	1696043	-	gi|255950012|ref|XP_002565773.1|	-	1,3-beta-glucanosyltransferase gel3
g513	contig_17	1697820	1699265	+	-	-	-	-
g514	contig_17	1700011	1701596	-	gi|584409219|emb|CDM36137.1|	-	-	-
g515	contig_17	1703981	1705493	+	gi|358401819|gb|EHK51113.1|	-	Unsaturated glucuronyl hydrolase
g516	contig_17	1706200	1707811	-	gi|407259485|gb|AFT91369.1|	-	Putative acetyltransferase C18B11.09c
g517	contig_17	1709865	1711636	+	gi|584416135|emb|CDM27835.1|	-	-	-
g518	contig_17	1711878	1713707	-	gi|255950024|ref|XP_002565779.1|	-	SWR1-complex protein 4	KOG2656
g519	contig_17	1714000	1714849	+	gi|255950026|ref|XP_002565780.1|	-	Protein ERP5	KOG1690
g520	contig_17	1716698	1719544	-	gi|255950028|ref|XP_002565781.1|	GO:0005524	Sensor kinase protein RcsC
g521	contig_17	1720484	1721944	+	gi|255950034|ref|XP_002565784.1|	GO:0004301	Putative epoxide hydrolase	KOG2565
g522	contig_17	1722233	1723038	-	gi|584416125|emb|CDM27825.1|	GO:0004298	Proteasome subunit beta type-3	KOG0180
g523	contig_17	1723370	1724944	+	gi|584416124|emb|CDM27824.1|	-	Tether containing UBX domain for GLUT4
g524	contig_17	1725404	1730049	-	gi|425781830|gb|EKV19774.1|	GO:0003735	60S ribosomal protein L36	KOG2053
g525	contig_17	1733223	1734825	+	gi|255950046|ref|XP_002565790.1|	-	-	-
g526	contig_17	1735969	1737810	-	gi|255950048|ref|XP_002565791.1|	-	Uncharacterized WD repeat-containing protein C2E1P5.05	KOG0299
g527	contig_17	1738213	1738924	+	gi|255950050|ref|XP_002565792.1|	GO:0004298	Probable proteasome subunit beta type-4	KOG0177
g528	contig_17	1739223	1741098	+	gi|255950052|ref|XP_002565793.1|	GO:0008270	Probable mRNA-splicing protein ubp10	KOG2026
g529	contig_17	1741388	1744275	-	gi|584416115|emb|CDM27815.1|	-	-	-
g530	contig_17	1744548	1747567	+	gi|425781822|gb|EKV19766.1|	-	Probable U3 small nucleolar RNA-associated protein 13	KOG0319
g531	contig_17	1747921	1749495	-	gi|255950058|ref|XP_002565796.1|	-	Pre-mRNA-splicing factor spp2
g532	contig_17	1749732	1751618	-	gi|255956745|ref|XP_002569125.1|	GO:0050660	6-hydroxy-D-nicotine oxidase
g533	contig_17	1752494	1753464	+	gi|255950060|ref|XP_002565797.1|	-	Protein RTA1
g534	contig_17	1754130	1758555	-	gi|255950064|ref|XP_002565799.1|	-	Chromatin modification-related protein eaf1	KOG0391
g535	contig_17	1759161	1760683	+	gi|255950066|ref|XP_002565800.1|	-	Protein MAK11	KOG0294
g536	contig_17	1761081	1763177	+	gi|255950068|ref|XP_002565801.1|	GO:0005525	Eukaryotic translation initiation factor 2 subunit gamma	KOG0466
g537	contig_17	1764249	1765798	+	gi|584416108|emb|CDM27808.1|	GO:0004222	CAAX prenyl protease 1	KOG2719
g538	contig_17	1766081	1766770	-	gi|255950072|ref|XP_002565803.1|	-	-	-
g539	contig_17	1767109	1767648	+	gi|584416106|emb|CDM27806.1|	GO:0003735	-	-
g540	contig_17	1768116	1771359	-	gi|255950076|ref|XP_002565805.1|	GO:0008270	Uncharacterized protein C3H1.02c	KOG0961
g541	contig_17	1772094	1774704	+	gi|255950078|ref|XP_002565806.1|	-	Centromere/kinetochore protein zw10 homolog	KOG2163
g542	contig_17	1774932	1776455	+	gi|425781812|gb|EKV19756.1|	-	Ribosome biogenesis protein ytm1	KOG0313
g543	contig_17	1776814	1777475	-	gi|425781811|gb|EKV19755.1|	GO:0003735	37S ribosomal protein subunit sws2, mitochondrial	KOG3311
g544	contig_17	1777693	1778933	+	gi|425781810|gb|EKV19754.1|	GO:0003755	Peptidyl-prolyl cis-trans isomerase B	KOG0880
g545	contig_17	1779634	1781713	+	gi|255950086|ref|XP_002565810.1|	GO:0008026	ATP-dependent RNA helicase ded1	KOG0335
g546	contig_17	1783060	1785407	+	gi|584416099|emb|CDM27799.1|	-	Ino eighty subunit 1
g547	contig_17	1786250	1787455	+	gi|255950090|ref|XP_002565812.1|	-	Protein NSG2
g548	contig_17	1788212	1790228	+	gi|255950092|ref|XP_002565813.1|	GO:0003824	Bifunctional purine biosynthesis protein ADE17	KOG2555
g549	contig_17	1792497	1794863	+	gi|584416096|emb|CDM27796.1|	GO:0008236	Aorsin
g550	contig_17	1795497	1796195	+	gi|425766149|gb|EKV04775.1|	-	-	-
g551	contig_17	1802625	1803407	+	gi|255950100|ref|XP_002565817.1|	-	-	-
g552	contig_17	1805007	1806514	+	gi|255950102|ref|XP_002565818.1|	-	Universal stress protein A family protein C25B2.10
g553	contig_17	1807698	1812360	-	gi|584416092|emb|CDM27791.1|	GO:0005515	Eukaryotic translation initiation factor 4 gamma	KOG0401
g554	contig_17	1813940	1815045	-	gi|255950110|ref|XP_002565822.1|	-	Receptor expression-enhancing protein 4	KOG1726
g555	contig_17	1815502	1816470	+	gi|255950112|ref|XP_002565823.1|	-	Uncharacterized protein YGR127W	KOG2342
g556	contig_17	1817938	1819600	+	gi|255950118|ref|XP_002565826.1|	GO:0030248	Probable endo-beta-1,4-glucanase B
g557	contig_17	1820368	1821249	-	gi|115383854|ref|XP_001208474.1|	-	-	-
g558	contig_17	1822204	1823812	-	gi|425770976|gb|EKV09435.1|	GO:0016491	Putative aldehyde dehydrogenase-like protein C922.07c	KOG2450
g559	contig_17	1824817	1825707	+	gi|584416083|emb|CDM27782.1|	GO:0016829	4-hydroxy-tetrahydrodipicolinate synthase
g560	contig_17	1825862	1828588	-	gi|119472269|ref|XP_001258306.1|	GO:0004553	Probable beta-glucosidase J
g561	contig_17	1829041	1831020	-	gi|440639148|gb|ELR09067.1|	GO:0008270	Uncharacterized transcriptional regulatory protein YKL222C
g562	contig_17	1831558	1833111	+	gi|440639149|gb|ELR09068.1|	GO:0022857	Lactose permease	KOG0254
g563	contig_17	1833669	1834985	-	gi|119472312|ref|XP_001258311.1|	-	Kremen protein 2
g564	contig_17	1835886	1836745	-	gi|347826604|emb|CCD42301.1|	-	Alkali-sensitive linkage protein 1	KOG4157
g565	contig_17	1837547	1840310	+	gi|159124647|gb|EDP49765.1|	-	Glucan 1,3-beta-glucosidase
g566	contig_17	1842023	1843913	-	gi|596648097|ref|XP_007272694.1|	-	Protein FMP42
g567	contig_17	1846187	1847266	-	gi|255930167|ref|XP_002556643.1|	GO:0016491	Protein TOXD	KOG1198
g568	contig_17	1847708	1848727	+	gi|255930165|ref|XP_002556642.1|	GO:0016491	NADPH-dependent 1-acyldihydroxyacetone phosphate reductase	KOG1209
g569	contig_17	1849184	1850971	+	gi|145245115|ref|XP_001394826.1|	-	Putative HC-toxin efflux carrier TOXA	KOG0254
g570	contig_17	1851247	1853207	-	gi|584416084|emb|CDM27783.1|	-	Arginine metabolism regulation protein II
g571	contig_17	1855064	1856684	+	gi|255950126|ref|XP_002565830.1|	GO:0016491	Peroxisomal (S)-2-hydroxy-acid oxidase GLO5	KOG0538
g572	contig_17	1857354	1857622	+	gi|425770977|gb|EKV09436.1|	-	-	-
g573	contig_17	1858074	1859708	-	gi|584416087|emb|CDM27786.1|	-	-	-
g574	contig_17	1860408	1862023	+	gi|425770979|gb|EKV09438.1|	GO:0020037	Cytochrome P450 52A12	KOG0157
g575	contig_17	1862743	1864139	-	gi|212538627|ref|XP_002149469.1|	-	-	-
g576	contig_17	1865470	1866055	-	gi|550804533|gb|ERS96452.1|	GO:0005515	Receptor-interacting serine/threonine-protein kinase 4	KOG4369
g577	contig_17	1866819	1868852	-	gi|315047851|ref|XP_003173300.1|	GO:0016747	Uncharacterized protein YdhJ
g578	contig_17	1870788	1872380	+	gi|258571796|ref|XP_002544701.1|	-	Nonribosomal peptide synthetase 12	KOG1178
g579	contig_17	1872882	1876900	-	gi|255949100|ref|XP_002565317.1|	GO:0016491	Zinc-type alcohol dehydrogenase-like protein C1198.01	KOG0024
g580	contig_17	1876998	1879292	+	gi|425770974|gb|EKV09433.1|	GO:0003824	Biotin--protein ligase	KOG1536
g581	contig_17	1879689	1882727	-	gi|584416072|emb|CDM27770.1|	-	Uncharacterized MscS family protein C2C4.17c	KOG4629
g582	contig_17	1884360	1885604	-	gi|255950154|ref|XP_002565844.1|	-	-	-
g583	contig_17	1886089	1888019	-	gi|584416070|emb|CDM27768.1|	-	-	-
g584	contig_17	1888835	1890528	+	gi|425770968|gb|EKV09427.1|	-	E3 ubiquitin-protein ligase RNF13	KOG4628
g585	contig_17	1892350	1893669	+	gi|255950160|ref|XP_002565847.1|	GO:0030170	Aspartate aminotransferase, cytoplasmic	KOG1412
g586	contig_17	1894053	1895334	-	gi|425770966|gb|EKV09425.1|	-	Syntaxin UFE1
g587	contig_17	1895535	1896440	+	gi|515535704|ref|WP_016968797.1|	GO:0003824	Uncharacterized isomerase CA_C3446
g588	contig_17	1897482	1899102	-	gi|255950576|ref|XP_002566055.1|	GO:0005215	Uncharacterized membrane protein YFL054C	KOG0224
g589	contig_17	1900046	1901931	-	gi|255950166|ref|XP_002565850.1|	GO:0005515	Neutrophil cytosol factor 2	KOG4225
g590	contig_17	1903617	1904954	-	gi|425770963|gb|EKV09422.1|	GO:0018580	Probable nitronate monooxygenase
g591	contig_17	1905761	1906294	-	gi|255950176|ref|XP_002565855.1|	-	Thaumatin-like pathogenesis-related protein 1
g592	contig_17	1907441	1909325	-	gi|255946854|ref|XP_002564194.1|	-	Killer toxin subunits alpha/beta	KOG2806
g593	contig_17	1910859	1912373	+	gi|584416055|emb|CDM27753.1|	GO:0003848	Folic acid synthesis protein fol1	KOG2544
g594	contig_17	1912946	1914698	-	gi|255950198|ref|XP_002565866.1|	GO:0008270	ADP-ribosylation factor GTPase-activating protein glo3	KOG0706
g595	contig_17	1914996	1915852	+	gi|584416053|emb|CDM27751.1|	-	Mitochondrial import inner membrane translocase subunit tim21	KOG4836
g596	contig_17	1916243	1917804	-	gi|425770954|gb|EKV09413.1|	-	Mitochondrial enolase superfamily member 1
g597	contig_17	1918343	1920846	-	gi|425770953|gb|EKV09412.1|	-	U1 snRNP-associated protein usp107	KOG2253
g598	contig_17	1922663	1924376	+	gi|584416050|emb|CDM27748.1|	GO:0004347	Glucose-6-phosphate isomerase	KOG2446
g599	contig_17	1924681	1926005	+	gi|255950218|ref|XP_002565876.1|	-	-	-
g600	contig_17	1926394	1927032	-	gi|425770951|gb|EKV09410.1|	GO:0003735	-	-
g601	contig_17	1927337	1927817	+	gi|425770950|gb|EKV09409.1|	-	CDC25-like phosphatase YCH1	KOG3772
g602	contig_17	1928186	1929911	-	gi|584416046|emb|CDM27744.1|	-	NADH dehydrogenase [ubiquinone] complex I, assembly factor 7	KOG2901
g603	contig_17	1930543	1932451	-	gi|425770947|gb|EKV09406.1|	-	-	-
g604	contig_17	1932813	1935149	+	gi|255950238|ref|XP_002565886.1|	-	-	-
g605	contig_17	1935431	1936921	-	gi|425770946|gb|EKV09405.1|	GO:0005524	Serine/threonine-protein kinase ppk23	KOG0663
g606	contig_17	1937178	1938123	+	gi|255950236|ref|XP_002565885.1|	GO:0046872	Superoxide dismutase 1 copper chaperone	KOG4656
g607	contig_17	1941110	1942499	+	gi|145243954|ref|XP_001394489.1|	-	-	-
g608	contig_17	1943045	1944845	-	gi|255946243|ref|XP_002563889.1|	-	Uncharacterized transporter C757.13	KOG2533
g609	contig_17	1945626	1946930	-	gi|255946247|ref|XP_002563891.1|	GO:0016491	Putative oxidoreductase YteT	KOG2741
g610	contig_17	1949339	1951056	+	gi|425770943|gb|EKV09402.1|	GO:0015205	Purine-cytosine permease fcyB
g611	contig_17	1952061	1952687	+	gi|584416037|emb|CDM27735.1|	-	Uncharacterized oxidoreductase C736.13	KOG1208
g612	contig_17	1953830	1955203	+	gi|317148854|ref|XP_001822968.2|	-	Heat shock 70 kDa protein 12A	KOG0101
g613	contig_17	1956170	1957250	+	gi|169783568|ref|XP_001826246.1|	GO:0003676	Eukaryotic translation initiation factor 3 subunit G	KOG0122
g614	contig_17	1963032	1965287	+	gi|584416032|emb|CDM27730.1|	GO:0003677	-	-
g615	contig_17	1970811	1974195	-	gi|255950260|ref|XP_002565897.1|	GO:0003824	Long-chain-fatty-acid--CoA ligase 1	KOG1180
g616	contig_17	1974910	1976573	+	gi|425770933|gb|EKV09392.1|	-	Diaminohydroxyphosphoribosylamino-pyrimidine deaminase	KOG1018
g617	contig_17	1976942	1978432	-	gi|425770932|gb|EKV09391.1|	-	-	-
g618	contig_17	1981242	1983471	-	gi|584416026|emb|CDM27724.1|	-	Heat shock 70 kDa protein	KOG0102
g619	contig_17	1984572	1986936	+	gi|255950270|ref|XP_002565902.1|	-	Uncharacterized protein C4G3.03	KOG4532
g620	contig_17	1987741	1991961	+	gi|584416024|emb|CDM27722.1|	GO:0016818	Putative ATP-dependent RNA helicase C550.03c	KOG0947
g621	contig_17	1993212	1994435	-	gi|70984625|ref|XP_747819.1|	-	Nitrosoguanidine resistance protein SNG1
g622	contig_17	1996219	1997808	-	gi|255950300|ref|XP_002565917.1|	GO:0008270	SET domain and MYND-type zinc finger protein 6	KOG2084
g623	contig_17	1998973	2002737	-	gi|255950296|ref|XP_002565915.1|	GO:0005524	Carbamoyl-phosphate synthase arginine-specific large chain	KOG0370
g624	contig_17	2003709	2005310	-	gi|255950290|ref|XP_002565912.1|	-	-	-
g625	contig_17	2006268	2007183	+	gi|255950286|ref|XP_002565910.1|	-	-	-
g626	contig_17	2007478	2008461	+	gi|425770922|gb|EKV09381.1|	GO:0003676	Protein vip1
g627	contig_17	2008898	2009128	-	gi|255950282|ref|XP_002565908.1|	-	-	-
g628	contig_17	2010403	2013914	-	gi|255950280|ref|XP_002565907.1|	GO:0008565	Probable importin c550.11	KOG1991
g629	contig_17	2014689	2018521	-	gi|255950304|ref|XP_002565919.1|	GO:0005524	Peroxisome biosynthesis protein PAS1	KOG0735
g630	contig_17	2018850	2021452	+	gi|425770913|gb|EKV09372.1|	GO:0005524	DNA replication licensing factor mcm7	KOG0482
g631	contig_17	2021855	2022208	-	gi|255950308|ref|XP_002565921.1|	-	-	-
g632	contig_17	2024559	2025961	-	gi|584416010|emb|CDM27708.1|	-	ATP-dependent (S)-NAD(P)H-hydrate dehydratase	KOG3974
g633	contig_17	2026330	2027454	-	gi|425770909|gb|EKV09368.1|	-	-	-
g634	contig_17	2028086	2028470	+	gi|119195695|ref|XP_001248451.1|	GO:0003735	60S acidic ribosomal protein P2	KOG3449
g635	contig_17	2029123	2030074	+	gi|255950318|ref|XP_002565926.1|	GO:0003735	40S ribosomal protein S15	KOG0898
g636	contig_17	2031160	2032990	+	gi|255950320|ref|XP_002565927.1|	GO:0003824	Probable 4-coumarate--CoA ligase 1	KOG1176
g637	contig_17	2033137	2034099	-	gi|525582586|gb|EPS28836.1|	GO:0050662	Uncharacterized sugar epimerase YhfK
g638	contig_17	2034437	2035546	-	gi|7388013|sp|Q9Y834.1|PGLR1_PENOL	GO:0004650	Polygalacturonase 1
g639	contig_17	2036910	2038663	+	gi|255950328|ref|XP_002565931.1|	-	-	-
g640	contig_17	2038862	2040043	+	gi|255950330|ref|XP_002565932.1|	GO:0016491	Uncharacterized oxidoreductase YisS	KOG2741
g641	contig_17	2041257	2042853	+	gi|115492791|ref|XP_001211023.1|	GO:0050661	Dimethylaniline monooxygenase [N-oxide-forming] 1	KOG1399
g642	contig_17	2043262	2044461	-	gi|67902704|ref|XP_681608.1|	-	-	-
g643	contig_17	2045318	2046289	-	gi|584416000|emb|CDM27698.1|	GO:0050113	Inositol oxygenase 1	KOG1573
g644	contig_17	2047034	2048101	+	gi|255950334|ref|XP_002565934.1|	-	Protein GCY	KOG1577
g645	contig_17	2049459	2052760	-	gi|67539634|ref|XP_663591.1|	-	-	-
g646	contig_17	2055184	2057092	-	gi|255950338|ref|XP_002565936.1|	-	Siderophore iron transporter mirB	KOG0254
g647	contig_17	2058043	2058923	-	gi|425771020|gb|EKV09476.1|	GO:0003824	2,3-dehydroadipyl-CoA hydratase	KOG1680
g648	contig_17	2059331	2060729	+	gi|255950342|ref|XP_002565938.1|	-	Putative lysine N-acyltransferase C17G9.06c
g649	contig_17	2061672	2065667	+	gi|584415994|emb|CDM27692.1|	GO:0042626	Leptomycin B resistance protein pmd1	KOG0055
g650	contig_17	2065991	2072295	-	gi|255950346|ref|XP_002565940.1|	GO:0048037	Nonribosomal peptide synthetase 4	KOG1178
g651	contig_17	2074054	2075166	+	gi|255950348|ref|XP_002565941.1|	-	UPF0613 protein PB24D3.06c	KOG4840
g652	contig_17	2075911	2076336	+	gi|302905967|ref|XP_003049377.1|	-	Pyrroline-5-carboxylate reductase	KOG3124
g653	contig_17	2077558	2081154	-	gi|255950350|ref|XP_002565942.1|	-	-	-
g654	contig_17	2084452	2088229	-	gi|584415988|emb|CDM27686.1|	GO:0005515	SH3 domain-containing protein C23A1.17
g655	contig_17	2089018	2089971	+	gi|584415987|emb|CDM27685.1|	-	-	-
g656	contig_17	2090452	2091002	-	gi|425771012|gb|EKV09468.1|	GO:0003735	40S ribosomal protein S17	KOG0187
g657	contig_17	2091364	2092794	-	gi|255950362|ref|XP_002565948.1|	-	-	-
g658	contig_17	2093050	2094280	-	gi|584415984|emb|CDM27682.1|	GO:0050662	Putative NADPH-dependent methylglyoxal reductase GRP2	KOG1502
g659	contig_17	2096007	2103272	+	gi|255950366|ref|XP_002565950.1|	GO:0016773	Phosphatidylinositol 3-kinase tor2	KOG0891
g660	contig_17	2103917	2105316	+	gi|584415967|emb|CDM27665.1|	-	Pre-mRNA-splicing factor cwc25	KOG3869
g661	contig_17	2106102	2107445	-	gi|584406542|emb|CDM37752.1|	-	Nitrilotriacetate monooxygenase component A
g662	contig_17	2109710	2111293	-	gi|573991995|ref|XP_006673918.1|	GO:0008270	Uncharacterized transcriptional regulatory protein C1F7.11c
g663	contig_17	2115932	2120664	-	gi|573991995|ref|XP_006673918.1|	GO:0008324	Zinc homeostasis factor 1	KOG1483
g664	contig_17	2121214	2121536	+	gi|255949230|ref|XP_002565382.1|	GO:0046872	Copper transport protein ATOX1	KOG1603
g665	contig_17	2122553	2126122	+	gi|169764295|ref|XP_001816619.1|	GO:0046872	Putative copper-transporting ATPase HMA5	KOG0207
g666	contig_17	2128348	2130794	-	gi|425771004|gb|EKV09460.1|	-	AP-2 complex subunit beta	KOG1061
g667	contig_17	2131439	2132105	+	gi|255950384|ref|XP_002565959.1|	-	ER membrane protein complex subunit 4	KOG3318
g668	contig_17	2133220	2136862	-	gi|425771006|gb|EKV09462.1|	-	Kynureninase 1	KOG0255
g669	contig_17	2137172	2138293	+	gi|255950378|ref|XP_002565956.1|	-	Iron-sulfur assembly protein 2	KOG1119
g670	contig_17	2139269	2140836	-	gi|255950388|ref|XP_002565961.1|	-	Eukaryotic translation initiation factor 3 subunit L	KOG3677
g671	contig_17	2141662	2144107	-	gi|255950390|ref|XP_002565962.1|	GO:0008270	Nitrogen assimilation transcription factor nirA
g672	contig_17	2148197	2148859	-	gi|115491463|ref|XP_001210359.1|	-	Uncharacterized protein C26H8.11c	KOG4781
g673	contig_17	2149955	2151272	+	gi|255950392|ref|XP_002565963.1|	GO:0003824	Branched-chain-amino-acid aminotransferase, cytosolic	KOG0975
g674	contig_17	2151588	2153027	-	gi|425771037|gb|EKV09492.1|	-	A1 cistron-splicing factor aar2	KOG3937
g675	contig_17	2153617	2154235	-	gi|255950396|ref|XP_002565965.1|	GO:0003735	40S ribosomal protein S14	KOG0407
g676	contig_17	2154603	2161187	+	gi|584415950|emb|CDM27648.1|	GO:0004665	Protein ste16	KOG3694
g677	contig_17	2161599	2163266	+	gi|255950408|ref|XP_002565971.1|	GO:0004176	LON peptidase N-terminal domain and RING finger protein 3	KOG4159
g678	contig_17	2164306	2165909	+	gi|584415938|emb|CDM27636.1|	-	DNA repair protein rad9	KOG2810
g679	contig_17	2165969	2167276	-	gi|425771029|gb|EKV09484.1|	-	Ultraviolet-B receptor UVR8	KOG1426
g680	contig_17	2168674	2169311	-	gi|67538980|ref|XP_663264.1|	-	Cell wall integrity and stress response component 1	KOG4157
g681	contig_17	2170421	2172465	-	gi|255950418|ref|XP_002565976.1|	GO:0022857	Putative inorganic phosphate transporter C8E4.01c	KOG0252
g682	contig_17	2175730	2176809	+	gi|584415931|emb|CDM27629.1|	-	-	-
g683	contig_17	2178133	2179299	+	gi|425771157|gb|EKV09610.1|	GO:0050662	Mannitol-1-phosphate 5-dehydrogenase
g684	contig_17	2179524	2180512	-	gi|584415929|emb|CDM27627.1|	GO:0003824	Probable enoyl-CoA hydratase, mitochondrial	KOG1680
g685	contig_17	2180967	2182644	-	gi|425771155|gb|EKV09608.1|	GO:0008270	Transcriptional adapter 2	KOG0457
g686	contig_17	2183262	2185495	+	gi|255950430|ref|XP_002565982.1|	GO:0005524	Serine/threonine-protein kinase gad8	KOG0598
g687	contig_17	2187174	2190125	-	gi|255950432|ref|XP_002565983.1|	GO:0005198	Coatomer subunit beta'	KOG0276
g688	contig_17	2190786	2191620	-	gi|255950434|ref|XP_002565984.1|	GO:0016651	NADH-ubiquinone oxidoreductase 29.9 kDa subunit, mitochondrial
g689	contig_17	2192004	2194334	+	gi|425771151|gb|EKV09604.1|	-	Uncharacterized protein C3D6.13c	KOG0191
g690	contig_17	2194771	2195628	+	gi|425771150|gb|EKV09603.1|	-	-	-
g691	contig_17	2196654	2198504	+	gi|584415922|emb|CDM27620.1|	-	Uncharacterized amino-acid permease C584.13	KOG1289
g692	contig_17	2203413	2205077	+	gi|255950446|ref|XP_002565990.1|	-	Zinc finger and BTB domain-containing protein 7C
g693	contig_17	2211098	2211715	+	gi|255950448|ref|XP_002565991.1|	-	-	-
g694	contig_17	2212241	2215511	-	gi|584415915|emb|CDM27613.1|	-	Agmatine deiminase
g695	contig_17	2217443	2218477	+	gi|255950452|ref|XP_002565993.1|	GO:0016491	Uricase	KOG1599
g696	contig_17	2218918	2219645	-	gi|584415913|emb|CDM27611.1|	GO:0003735	54S ribosomal protein L23, mitochondrial	KOG3203
g697	contig_17	2220023	2220846	+	gi|425771141|gb|EKV09594.1|	GO:0003735	40S ribosomal protein S16	KOG1753
g698	contig_17	2227042	2231638	+	gi|255950462|ref|XP_002565998.1|	GO:0003887	DNA polymerase alpha catalytic subunit	KOG0970
g699	contig_17	2231919	2233963	+	gi|255950464|ref|XP_002565999.1|	-	Putative hydroxymethylpyrimidine/phosphomethylpyrimidine kinase 2	KOG2598
g700	contig_17	2234754	2237324	+	gi|425771138|gb|EKV09591.1|	GO:0008026	ATP-dependent RNA helicase dbp2	KOG0331
g701	contig_17	2237685	2238970	-	gi|119481047|ref|XP_001260552.1|	-	GDSL esterase/lipase At5g55050
g702	contig_17	2243991	2245689	+	gi|425771177|gb|EKV09628.1|	-	-	-
g703	contig_17	2248306	2250957	+	gi|425771176|gb|EKV09627.1|	-	Pentatricopeptide repeat-containing protein 2, mitochondrial
g704	contig_17	2251511	2253028	+	gi|584416059|emb|CDM27757.1|	-	Probable transporter SEO1	KOG2533
g705	contig_17	2255062	2256698	+	gi|255950478|ref|XP_002566006.1|	-	Dimethyl-sulfide monooxygenase
g706	contig_17	2256986	2258078	+	gi|255950480|ref|XP_002566007.1|	-	Protein YIP4	KOG2946
g707	contig_17	2258544	2261421	+	gi|425776654|gb|EKV14862.1|	-	Brefeldin A resistance protein	KOG0864
g708	contig_17	2262707	2268419	+	gi|255950486|ref|XP_002566010.1|	GO:0008026	Putative ATP-dependent helicase HRQ1	KOG4150
g709	contig_17	2269156	2271361	-	gi|255950488|ref|XP_002566011.1|	GO:0008270	Transcriptional regulatory protein moc3
g710	contig_17	2275075	2275807	-	gi|255950492|ref|XP_002566013.1|	GO:0016742	Phosphoribosylglycinamide formyltransferase	KOG3076
g711	contig_17	2276576	2279258	-	gi|255950494|ref|XP_002566014.1|	-	Uncharacterized RING finger protein P4H10.07	KOG0800
g712	contig_17	2279903	2281189	+	gi|255950496|ref|XP_002566015.1|	-	-	-
g713	contig_17	2281525	2283150	+	gi|255950502|ref|XP_002566018.1|	-	-	-
g714	contig_17	2283585	2285735	-	gi|255950504|ref|XP_002566019.1|	-	Vacuolar protein sorting-associated protein 9b	KOG2319
g715	contig_17	2286087	2287858	+	gi|584415835|emb|CDM27533.1|	GO:0004806	Putative lipase atg15	KOG4540
g716	contig_17	2289410	2291074	+	gi|584415834|emb|CDM27532.1|	GO:0020037	Catalase	KOG0047
g717	contig_17	2291936	2293747	+	gi|255950512|ref|XP_002566023.1|	GO:0022857	Maltose permease MAL61	KOG0254
g718	contig_17	2296839	2297870	+	gi|578492690|gb|EUN30088.1|	GO:0016491	Protein TOXD	KOG1198
g719	contig_17	2298147	2302782	-	gi|255941588|ref|XP_002561563.1|	GO:0042626	ABC transporter CDR4	KOG0065
g720	contig_17	2305887	2308164	+	gi|350637847|gb|EHA26203.1|	GO:0020037	Catalase R	KOG0047
g721	contig_17	2311072	2312007	+	gi|557722400|dbj|GAD98823.1|	GO:0050662	UDP-glucose 4-epimerase GEPI42
g722	contig_17	2313121	2315121	-	gi|317028966|ref|XP_001390821.2|	GO:0003824	Uncharacterized protein YfdE	KOG3957
g723	contig_17	2316277	2317361	-	gi|584415964|emb|CDM27662.1|	GO:0016491	Short-chain dehydrogenase TIC 32, chloroplastic	KOG1208
g724	contig_17	2318236	2319759	+	gi|525582712|gb|EPS28962.1|	GO:0005515	-	-
g725	contig_17	2319916	2320998	-	gi|255950514|ref|XP_002566024.1|	GO:0003824	Probable enoyl-CoA hydratase, mitochondrial	KOG1680
g726	contig_17	2321557	2323800	+	gi|425771242|gb|EKV09691.1|	GO:0005375	Protein RER1_x0001_sp|Q5R5U4.1|RER1_PONAB RecName: Full=Protein RER1	KOG1688
g727	contig_17	2325589	2327232	+	gi|350635148|gb|EHA23510.1|	GO:0004620	Lysophospholipase 1	KOG1325
g728	contig_17	2327820	2329729	+	gi|425771231|gb|EKV09680.1|	GO:0008081	Probable tyrosyl-DNA phosphodiesterase	KOG2031
g729	contig_17	2330058	2330638	-	gi|584415813|emb|CDM27511.1|	GO:0000062	Acyl-CoA-binding protein homolog 1
g730	contig_17	2330935	2331966	-	gi|425771233|gb|EKV09682.1|	GO:0005515	STIP1 homology and U box-containing protein 1	KOG4642
g731	contig_17	2332262	2332741	-	gi|255950546|ref|XP_002566040.1|	-	Putative ribose 5-phosphate isomerase
g732	contig_17	2334222	2335067	+	gi|525581878|gb|EPS28128.1|	GO:0004807	Putative triosephosphate isomerase	KOG1643
g733	contig_17	2336001	2337639	-	gi|255950540|ref|XP_002566037.1|	GO:0004152	Dihydroorotate dehydrogenase (quinone), mitochondrial	KOG1436
g734	contig_17	2342700	2344268	-	gi|350637242|gb|EHA25600.1|	-	Uncharacterized MFS-type transporter C530.15c	KOG0255
g735	contig_17	2345325	2346894	-	gi|584415820|emb|CDM27518.1|	GO:0016491	Alcohol dehydrogenase 1	KOG0023
g736	contig_17	2347496	2348306	-	gi|255950536|ref|XP_002566035.1|	GO:0005525	ADP-ribosylation factor-like protein 1	KOG0072
g737	contig_17	2348666	2353072	+	gi|531984894|gb|EQL35481.1|	-	Probable actin-related protein 8	KOG0797
g738	contig_17	2354271	2357422	+	gi|584415825|emb|CDM27523.1|	-	-	-
g739	contig_17	2358922	2360954	-	gi|525581883|gb|EPS28133.1|	GO:0016758	Dol-P-Glc:Glc(2)Man(9)GlcNAc(2)-PP-Dol alpha-1,2-glucosyltransferase	KOG2642
g740	contig_17	2361166	2362103	+	gi|525581884|gb|EPS28134.1|	-	DNA replication complex GINS protein psf2
g741	contig_17	2362460	2363153	-	gi|425781110|gb|EKV19092.1|	GO:0005515	Coupling of ubiquitin conjugation to ER degradation protein 1
g742	contig_17	2363703	2367485	-	gi|255939049|ref|XP_002560294.1|	GO:0005524	Structural maintenance of chromosomes protein 2	KOG0933
g743	contig_17	2368162	2369227	+	gi|584412948|emb|CDM31718.1|	GO:0008168	Demethylmenaquinone methyltransferase
g744	contig_17	2369505	2371392	-	gi|584412947|emb|CDM31717.1|	GO:0030528	General negative regulator of transcription subunit 2	KOG2151
g745	contig_17	2372194	2373161	+	gi|425781114|gb|EKV19096.1|	GO:0003735	54S ribosomal protein L4, mitochondrial	KOG3331
g746	contig_17	2373448	2375227	+	gi|255939043|ref|XP_002560291.1|	-	Rab GDP-dissociation inhibitor	KOG1439
g747	contig_17	2375466	2376109	-	gi|255939041|ref|XP_002560290.1|	-	Acyl-coenzyme A thioesterase 13	KOG3328
g748	contig_17	2376873	2379063	+	gi|584412941|emb|CDM31711.1|	GO:0005524	Origin recognition complex subunit 4	KOG2228
g749	contig_17	2387689	2389678	+	gi|255939035|ref|XP_002560287.1|	GO:0004871	Developmental regulator flbA	KOG3589
g750	contig_17	2391452	2394708	-	gi|255939031|ref|XP_002560285.1|	-	Cell division control protein 73	KOG2504
g751	contig_17	2397589	2400276	-	gi|525581900|gb|EPS28150.1|	GO:0005515	SET domain-containing protein 3	KOG1844
g752	contig_17	2402110	2403672	-	gi|584412933|emb|CDM31703.1|	-	Probable proline-specific permease put4	KOG1286
g753	contig_17	2403995	2405265	-	gi|255939025|ref|XP_002560282.1|	-	Nucleoporin SEH1	KOG2445
g754	contig_17	2405550	2407051	+	gi|255939023|ref|XP_002560281.1|	GO:0008963	UDP-N-acetylglucosamine--dolichyl-phosphate N-acetylglucosaminephosphotransferase	KOG2788
g755	contig_17	2407215	2408789	-	gi|584412930|emb|CDM31700.1|	-	Uncharacterized membrane protein C6F6.04c	KOG3098
g756	contig_17	2410135	2411594	+	gi|584412929|emb|CDM31699.1|	GO:0016491	Quinone oxidoreductase
g757	contig_17	2413385	2415754	+	gi|255939017|ref|XP_002560278.1|	-	3-isopropylmalate dehydratase	KOG0454
g758	contig_17	2416084	2417784	-	gi|358368466|dbj|GAA85083.1|	-	Amino-acid permease BAT1	KOG1289
g759	contig_17	2418192	2419706	+	gi|115492393|ref|XP_001210824.1|	GO:0020037	Pisatin demethylase	KOG0158
g760	contig_17	2420473	2421285	+	gi|242825902|ref|XP_002488534.1|	-	-	-
g761	contig_17	2421319	2422284	+	gi|594712640|gb|EXU95596.1|	-	-	-
g762	contig_17	2425325	2434544	-	gi|255939015|ref|XP_002560277.1|	GO:0043169	Cell wall alpha-1,3-glucan synthase ags1
g763	contig_17	2438199	2438936	-	gi|255939013|ref|XP_002560276.1|	-	Orotate phosphoribosyltransferase	KOG1377
g764	contig_17	2439562	2441400	+	gi|255939011|ref|XP_002560275.1|	GO:0004489	Methylenetetrahydrofolate reductase 1	KOG0564
g765	contig_17	2442880	2445996	-	gi|255939009|ref|XP_002560274.1|	-	-	-
g766	contig_17	2446806	2448253	-	gi|425781134|gb|EKV19116.1|	-	Meiotically up-regulated gene 154 protein
g767	contig_17	2448603	2451240	+	gi|425773108|gb|EKV11480.1|	GO:0046961	V-type proton ATPase subunit F	KOG3432
g768	contig_17	2452025	2452667	-	gi|584412921|emb|CDM31691.1|	-	Phosphatidylglycerol/phosphatidylinositol transfer protein	KOG4680
g769	contig_17	2454455	2456223	-	gi|557729427|dbj|GAD92025.1|	GO:0030151	Sulfite oxidase, mitochondrial	KOG0535
g770	contig_17	2457464	2462009	+	gi|115400213|ref|XP_001215695.1|	GO:0051539	Molybdenum cofactor biosynthesis protein 1
g771	contig_17	2462617	2463384	+	gi|584416752|emb|CDM28459.1|	-	Protein fmp52-2, mitochondrial	KOG4039
g772	contig_17	2463944	2467140	+	gi|134080417|emb|CAK41167.1|	GO:0005515	Ankyrin-1	KOG4177
g773	contig_17	2471938	2473395	-	gi|255938959|ref|XP_002560249.1|	-	Probable glucan endo-1,3-beta-glucosidase eglC
g774	contig_17	2475297	2476919	+	gi|425781139|gb|EKV19121.1|	GO:0004177	D-aminopeptidase
g775	contig_17	2479269	2481534	-	gi|115396492|ref|XP_001213885.1|	GO:0022857	General alpha-glucoside permease	KOG0254
g776	contig_17	2483071	2486462	+	gi|557721686|dbj|GAD99488.1|	GO:0015923	Alpha-mannosidase	KOG4342
g777	contig_17	2487532	2488581	-	gi|584408830|emb|CDM35743.1|	-	Uncharacterized protein AN5342
g778	contig_17	2493855	2494327	-	gi|525580385|gb|EPS26635.1|	GO:0004553	Endochitinase 1	KOG2806
g779	contig_17	2497126	2498829	+	gi|119483840|ref|XP_001261823.1|	GO:0005315	Phosphate-repressible phosphate permease	KOG2493
g780	contig_17	2505887	2506309	+	gi|584417841|emb|CDM29556.1|	-	Boletus edulis lectin
g781	contig_17	2510002	2512683	+	gi|242821429|ref|XP_002487679.1|	GO:0005515	Ankyrin-1	KOG4177
g782	contig_17	2513908	2514611	-	gi|146323867|ref|XP_751579.2|	-	-	-
g783	contig_17	2515949	2516527	-	gi|255948140|ref|XP_002564837.1|	-	-	-
g784	contig_17	2519322	2520816	-	gi|425781138|gb|EKV19120.1|	GO:0016747	3-ketoacyl-CoA thiolase, peroxisomal	KOG1389
g785	contig_17	2521596	2526002	+	gi|255938999|ref|XP_002560269.1|	GO:0003824	Long-chain fatty acid transport protein 6	KOG1179
g786	contig_17	2526525	2528135	+	gi|525581923|gb|EPS28173.1|	GO:0004497	Tetracenomycin polyketide synthesis hydroxylase TcmG	KOG3855
g787	contig_17	2528347	2530333	-	gi|238502205|ref|XP_002382336.1|	GO:0016491	-	-
g788	contig_17	2530954	2531800	+	gi|391865299|gb|EIT74589.1|	GO:0005515	Glutathione S-transferase P 10	KOG1695
g789	contig_17	2532319	2533824	-	gi|302889926|ref|XP_003043848.1|	GO:0004553	Endoglucanase C307
g790	contig_17	2534302	2536119	-	gi|358390541|gb|EHK39946.1|	GO:0008270	Oleate-activated transcription factor 1
g791	contig_17	2536578	2538238	+	gi|342886562|gb|EGU86356.1|	GO:0022857	General alpha-glucoside permease	KOG0254
g792	contig_17	2539704	2541503	+	gi|525581925|gb|EPS28175.1|	GO:0022857	High-affinity glucose transporter SNF3	KOG0254
g793	contig_17	2541943	2543095	-	gi|584412915|emb|CDM31685.1|	-	KRR1 small subunit processome component	KOG2874
g794	contig_17	2545038	2550803	-	gi|584412913|emb|CDM31683.1|	GO:0008168	-	-
g795	contig_17	2551345	2554163	-	gi|584412911|emb|CDM31681.1|	-	Spindle pole body component alp4	KOG2001
g796	contig_17	2554463	2555531	+	gi|255938979|ref|XP_002560259.1|	GO:0004298	Probable proteasome subunit alpha type-5	KOG0176
g797	contig_17	2555712	2557244	-	gi|425781147|gb|EKV19129.1|	GO:0008168	Ribosomal RNA-processing protein 8	KOG3045
g798	contig_17	2557912	2563008	+	gi|425781148|gb|EKV19130.1|	GO:0008270	Uncharacterized transcriptional regulatory protein C15D4.02
g799	contig_17	2563297	2564512	+	gi|425781150|gb|EKV19132.1|	-	Protein GVP36
g800	contig_17	2566342	2567769	-	gi|584412904|emb|CDM31674.1|	-	Protein arv1	KOG3134
g801	contig_17	2571587	2571820	+	-	-	-	-
g802	contig_17	2578324	2583393	-	gi|539438583|gb|ERF74254.1|	-	Serine/threonine-protein phosphatase 6 regulatory ankyrin repeat subunit B	KOG0504
g803	contig_17	2590460	2590945	-	gi|24652946|ref|NP_610756.2|	-	-	-
g804	contig_17	2614648	2615594	+	-	-	-	-
g805	contig_17	2619210	2621324	-	gi|154287244|ref|XP_001544417.1|	-	-	-
g806	contig_17	2634556	2635255	+	gi|525585377|gb|EPS31627.1|	-	-	-
g807	contig_17	2636811	2638644	-	gi|317027827|ref|XP_001400072.2|	GO:0020037	Trichodiene oxygenase	KOG0158
g808	contig_17	2640785	2642437	+	gi|525581447|gb|EPS27697.1|	GO:0020037	Acyl-CoA desaturase	KOG0537
g809	contig_17	2643852	2645638	+	gi|317027827|ref|XP_001400072.2|	GO:0020037	Trichodiene oxygenase	KOG0158
g810	contig_17	2647057	2648718	+	gi|238508164|ref|XP_002385283.1|	-	-	-
g811	contig_17	2653097	2653723	+	gi|115389410|ref|XP_001212210.1|	-	-	-
g812	contig_17	2654972	2656030	+	gi|425780926|gb|EKV18917.1|	-	Uncharacterized protein YukJ
g813	contig_17	2657008	2658033	+	gi|238484113|ref|XP_002373295.1|	-	-	-
g814	contig_17	2658609	2660083	-	gi|242812224|ref|XP_002485914.1|	-	Peroxisomal membrane protein LPX1
g815	contig_17	2661102	2668232	+	gi|115390402|ref|XP_001212706.1|	GO:0048037	Nonribosomal peptide synthetase 8	KOG1178
g816	contig_17	2669774	2670532	-	gi|584412885|emb|CDM31655.1|	GO:0003824	Phosphopantothenoylcysteine decarboxylase	KOG0672
g817	contig_17	2671302	2673742	+	gi|255940504|ref|XP_002561021.1|	-	Homoaconitase, mitochondrial	KOG0453
g818	contig_17	2675713	2676241	+	gi|568113674|gb|ETN36296.1|	-	-	-
g819	contig_17	2676550	2676807	-	gi|119499393|ref|XP_001266454.1|	GO:0008061	-	-
g820	contig_17	2677547	2678874	-	gi|358383238|gb|EHK20906.1|	-	Putative uncharacterized oxidoreductase C513.07	KOG1502
g821	contig_17	2681391	2683639	-	gi|584412874|emb|CDM31644.1|	-	Amino-acid acetyltransferase, mitochondrial	KOG2436
g822	contig_17	2685030	2686091	+	gi|255938931|ref|XP_002560235.1|	GO:0008080	Polyamine N-acetyltransferase 1	KOG4144
g823	contig_17	2686638	2688886	+	gi|425773616|gb|EKV11958.1|	GO:0005525	Nucleolar GTP-binding protein 1	KOG1490
g824	contig_17	2691843	2693636	+	gi|255938935|ref|XP_002560237.1|	GO:0022857	High-affinity fructose transporter ght6	KOG0254
g825	contig_17	2693866	2694938	-	gi|525581945|gb|EPS28195.1|	GO:0004616	Uncharacterized oxidoreductase YfjR	KOG0409
g826	contig_17	2695265	2696280	-	gi|584412880|emb|CDM31650.1|	GO:0015035	Glutathione S-transferase kappa 1
g827	contig_17	2696916	2698745	-	gi|255938941|ref|XP_002560240.1|	-	Uncharacterized MFS-type transporter C530.15c	KOG0255
g828	contig_17	2700743	2701936	+	gi|584411537|emb|CDM30300.1|	GO:0016787	N-acyl homoserine lactonase AttM
g829	contig_17	2703430	2704542	-	gi|255938943|ref|XP_002560241.1|	-	-	-
g830	contig_17	2705188	2706443	+	gi|255938945|ref|XP_002560242.1|	GO:0008108	Galactose-1-phosphate uridylyltransferase	KOG2958
g831	contig_17	2706667	2707126	-	gi|255938947|ref|XP_002560243.1|	-	Ergosterol biosynthetic protein 28	KOG3455
g832	contig_17	2707289	2708386	+	gi|584412884|emb|CDM31654.1|	GO:0016491	Very-long-chain 3-oxoacyl-CoA reductase	KOG1014
g833	contig_17	2708780	2711803	+	gi|255946165|ref|XP_002563850.1|	GO:0016491	-	-
g834	contig_17	2714683	2716560	+	gi|255946163|ref|XP_002563849.1|	-	-	-
g835	contig_17	2717074	2718111	-	gi|255946161|ref|XP_002563848.1|	-	-	-
g836	contig_17	2718451	2718963	-	gi|525581958|gb|EPS28208.1|	-	-	-
g837	contig_17	2719175	2721844	+	gi|425774028|gb|EKV12351.1|	GO:0003684	DNA repair protein rhp42	KOG2179
g838	contig_17	2722077	2723970	-	gi|255946173|ref|XP_002563854.1|	-	-	-
g839	contig_17	2724129	2724821	+	gi|255946175|ref|XP_002563855.1|	-	HD domain-containing protein C4G3.17	KOG3197
g840	contig_17	2726079	2729523	-	gi|255946187|ref|XP_002563861.1|	GO:0005524	Lon protease homolog, mitochondrial	KOG2004
g841	contig_17	2729897	2731645	+	gi|425774015|gb|EKV12338.1|	GO:0051082	DnaJ homolog 1, mitochondrial	KOG0715
g842	contig_17	2732188	2735279	+	gi|525581968|gb|EPS28218.1|	-	Vacuolar protein-sorting protein bro1	KOG2220
g843	contig_17	2736307	2737008	-	gi|584406987|emb|CDM37295.1|	-	-	-
g844	contig_17	2743007	2744242	+	gi|255946197|ref|XP_002563866.1|	-	Probable DNA-binding protein creA	KOG1721
g845	contig_17	2746414	2747460	+	gi|255946199|ref|XP_002563867.1|	-	-	-
g846	contig_17	2747806	2748561	+	gi|584406936|emb|CDM37241.1|	-	U6 snRNA-associated Sm-like protein LSm1	KOG1782
g847	contig_17	2750164	2750864	+	gi|255946177|ref|XP_002563856.1|	-	Bis(5'-nucleosyl)-tetraphosphatase [asymmetrical]	KOG3379
g848	contig_17	2751513	2751948	-	gi|212537147|ref|XP_002148729.1|	-	-	-
g849	contig_17	2752257	2754146	-	gi|596680275|ref|XP_007278687.1|	GO:0008236	Tripeptidyl-peptidase SED1
g850	contig_17	2754995	2755351	+	gi|296816575|ref|XP_002848624.1|	-	-	-
g851	contig_17	2756061	2759594	+	gi|255946185|ref|XP_002563860.1|	GO:0004672	Activated CDC42 kinase 1
g852	contig_17	2760190	2761611	-	gi|584406995|emb|CDM37303.1|	-	COBW domain-containing protein 1	KOG2743
g853	contig_17	2762120	2763597	+	gi|525581963|gb|EPS28213.1|	-	MOB kinase activator-like 4	KOG1852
g854	contig_17	2765549	2769453	+	gi|255946203|ref|XP_002563869.1|	-	Ribosomal RNA-processing protein 12	KOG1248
g855	contig_17	2769876	2771118	-	gi|584406934|emb|CDM37239.1|	GO:0051287	Uncharacterized protein YLL056C
g856	contig_17	2771475	2773051	+	gi|425774008|gb|EKV12331.1|	-	-	-
g857	contig_17	2773188	2775047	-	gi|587713883|gb|EWZ85220.1|	-	Calcium-independent phospholipase A2-gamma	KOG4231
g858	contig_17	2776773	2778483	-	gi|255946211|ref|XP_002563873.1|	GO:0020037	Cytochrome P450 52A13	KOG0157
g859	contig_17	2779404	2780783	-	gi|557721436|dbj|GAD99721.1|	-	Phosphatidylinositol transfer protein CSR1	KOG1470
g860	contig_17	2781384	2783611	-	gi|584406931|emb|CDM37236.1|	-	-	-
g861	contig_17	2784291	2785640	+	gi|557722142|dbj|GAD99058.1|	GO:0016747	-	-
g862	contig_17	2785871	2786719	-	gi|584406930|emb|CDM37235.1|	-	Putative methylesterase 14, chloroplastic
g863	contig_17	2790184	2792294	-	gi|584410589|emb|CDM34617.1|	-	Uncharacterized MFS-type transporter C16A3.17c	KOG0254
g864	contig_17	2793489	2794208	+	gi|255946223|ref|XP_002563879.1|	GO:0016491	Alkylated DNA repair protein alkB homolog 8	KOG4176
g865	contig_17	2795376	2796588	+	gi|584410093|emb|CDM34118.1|	-	-	-
g866	contig_17	2796719	2798273	-	gi|584406927|emb|CDM37232.1|	GO:0016491	Probable oxidoreductase OrdL
g867	contig_17	2798490	2801227	-	gi|584406928|emb|CDM37233.1|	GO:0016758	Sterol 3-beta-glucosyltransferase	KOG1192
g868	contig_17	2803415	2804596	+	gi|584406798|emb|CDM37098.1|	-	RNA exonuclease 3	KOG2248
g869	contig_17	2806168	2806927	+	gi|302881212|ref|XP_003039524.1|	-	-	-
g870	contig_17	2807580	2809969	+	gi|159122247|gb|EDP47369.1|	-	Glucan endo-1,3-beta-glucosidase BGN13.1
g871	contig_17	2810969	2812000	-	gi|255946249|ref|XP_002563892.1|	-	-	-
g872	contig_17	2814799	2817189	-	gi|596693258|ref|XP_007281149.1|	-	-	-
g873	contig_17	2817787	2818555	+	gi|596693252|ref|XP_007281148.1|	-	Uncharacterized protein C5H10.02c
g874	contig_17	2820117	2821633	+	gi|119499343|ref|XP_001266429.1|	-	-	-
g875	contig_17	2822274	2823135	+	gi|599156022|gb|EYE95198.1|	-	-	-
g876	contig_17	2823786	2826735	-	gi|121714082|ref|XP_001274652.1|	GO:0016491	Uncharacterized oxidoreductase MexAM1_META1p0182	KOG1204
g877	contig_17	2828365	2829375	+	gi|451999461|gb|EMD91923.1|	GO:0016491	Zinc-type alcohol dehydrogenase-like protein C16A3.02c	KOG1198
g878	contig_17	2830347	2831339	-	gi|255940496|ref|XP_002561017.1|	-	Sphingoid long-chain base transporter RSB1
g879	contig_17	2831819	2834021	+	gi|584408006|emb|CDM36836.1|	-	-	-
g880	contig_17	2839654	2842498	+	gi|425765902|gb|EKV04543.1|	GO:0005515	General transcriptional corepressor trfA	KOG1124
g881	contig_17	2842886	2844669	+	gi|584406804|emb|CDM37104.1|	GO:0003735	60S ribosomal protein L3	KOG0746
g882	contig_17	2845268	2845939	+	gi|425765903|gb|EKV04544.1|	-	-	-
g883	contig_17	2847289	2849477	+	gi|584406806|emb|CDM37106.1|	-	Uncharacterized beta-glucan synthesis-associated protein C23H3.11c
g884	contig_17	2850769	2851743	+	gi|425765905|gb|EKV04546.1|	-	-	-
g885	contig_17	2852944	2854816	-	gi|255946265|ref|XP_002563900.1|	GO:0005524	[Pyruvate dehydrogenase [lipoamide]] kinase, mitochondrial	KOG0787
g886	contig_17	2856575	2856892	+	gi|584406810|emb|CDM37110.1|	-	-	-
g887	contig_17	2857938	2859783	-	gi|255946269|ref|XP_002563902.1|	-	Adenylosuccinate lyase	KOG2700
g888	contig_17	2859997	2861982	-	gi|255946271|ref|XP_002563903.1|	-	Exocyst complex protein exo70	KOG2344
g889	contig_17	2862442	2864814	+	gi|255946273|ref|XP_002563904.1|	GO:0004620	Cytosolic phospholipase A2 zeta	KOG1325
g890	contig_17	2865120	2867750	-	gi|584406814|emb|CDM37114.1|	GO:0008138	Phosphatidylinositol 3,4,5-trisphosphate 3-phosphatase cnrN	KOG2283
g891	contig_17	2868381	2871222	-	gi|584406816|emb|CDM37116.1|	-	Probable U6 snRNA-associated Sm-like protein LSm4	KOG4197
g892	contig_17	2871674	2873367	-	gi|255946283|ref|XP_002563909.1|	GO:0004402	Histone acetyltransferase type B catalytic subunit	KOG2696
g893	contig_17	2875746	2876618	+	gi|255946289|ref|XP_002563912.1|	-	Protein RTA1
g894	contig_17	2877028	2878312	+	gi|584406822|emb|CDM37122.1|	GO:0046873	Zinc transporter ZIP9-A	KOG3907
g895	contig_17	2879263	2881424	+	gi|255946293|ref|XP_002563914.1|	-	F-box/WD repeat-containing protein 7	KOG0274
g896	contig_17	2882268	2885656	+	gi|584406824|emb|CDM37124.1|	GO:0008270	Mitochondrial phosphate carrier protein 2
g897	contig_17	2886124	2886919	+	gi|425765345|gb|EKV04045.1|	-	-	-
g898	contig_17	2888958	2889356	+	-	-	-	-
g899	contig_17	2889552	2891067	-	gi|238500235|ref|XP_002381352.1|	-	-	-
g900	contig_17	2892618	2894230	-	gi|425765344|gb|EKV04044.1|	-	Sporulation protein RMD1	KOG2861
g901	contig_17	2894828	2895754	-	gi|255946305|ref|XP_002563920.1|	-	-	-
g902	contig_17	2898038	2898907	-	gi|584406830|emb|CDM37130.1|	-	CTD kinase subunit gamma
g903	contig_17	2899224	2902074	-	gi|584406831|emb|CDM37131.1|	GO:0005515	H(+)/Cl(-) exchange transporter 3	KOG0475
g904	contig_17	2902309	2917105	+	gi|255946309|ref|XP_002563922.1|	GO:0016887	Midasin	KOG1808
g905	contig_17	2917294	2918262	-	gi|255957031|ref|XP_002569268.1|	GO:0016491	Very-long-chain 3-oxoacyl-CoA reductase	KOG1014
g906	contig_17	2918654	2919817	-	gi|255946311|ref|XP_002563923.1|	-	-	-
g907	contig_17	2920541	2921912	+	gi|425765336|gb|EKV04036.1|	GO:0005524	cAMP-dependent protein kinase type 2	KOG0616
g908	contig_17	2922293	2922706	-	gi|255946315|ref|XP_002563925.1|	-	Mitochondrial import inner membrane translocase subunit tim13	KOG1733
g909	contig_17	2923021	2924336	+	gi|255946317|ref|XP_002563926.1|	-	L-type lectin-like domain-containing protein C126.08c	KOG3839
g910	contig_17	2924652	2925665	-	gi|425765339|gb|EKV04039.1|	-	-	-
g911	contig_17	2926403	2927470	-	gi|584408258|emb|CDM35165.1|	-	26S proteasome non-ATPase regulatory subunit 10
g912	contig_17	2930988	2933661	-	gi|425765334|gb|EKV04034.1|	-	Stress-activated map kinase-interacting protein 1	KOG3739
g913	contig_17	2934281	2937479	-	gi|584406841|emb|CDM37144.1|	GO:0005524	Replication factor C subunit 1	KOG1968
g914	contig_17	2937937	2938755	+	gi|425765330|gb|EKV04030.1|	GO:0003735	54S ribosomal protein L16, mitochondrial	KOG3422
g915	contig_17	2938825	2939371	-	gi|584406843|emb|CDM37146.1|	-	-	-
g916	contig_17	2939867	2941204	-	gi|584406845|emb|CDM37148.1|	GO:0005524	Replication factor C subunit 5	KOG2035
g917	contig_17	2941597	2944816	-	gi|557726838|dbj|GAD94559.1|	GO:0005507	Cytochrome c oxidase assembly protein COX11, mitochondrial
g918	contig_17	2945795	2947136	+	gi|255946339|ref|XP_002563937.1|	GO:0030528	-	-
g919	contig_17	2949181	2950194	+	gi|584406849|emb|CDM37152.1|	-	-	-
g920	contig_17	2950725	2952635	+	gi|584406850|emb|CDM37153.1|	-	Regulator of drug sensitivity 2
g921	contig_17	2953399	2956754	-	gi|255946347|ref|XP_002563941.1|	-	Mitogen-activated protein kinase-binding protein 1	KOG1408
g922	contig_17	2958087	2958932	+	gi|584406855|emb|CDM37158.1|	-	Required for respiratory growth protein 9, mitochondrial
g923	contig_17	2959319	2961935	+	gi|255946363|ref|XP_002563949.1|	-	Retrograde Golgi transport protein RGP1 homolog	KOG4469
g924	contig_17	2962354	2963335	+	gi|255946361|ref|XP_002563948.1|	-	Probable maintenance of ploidy protein mob1	KOG0440
g925	contig_17	2964301	2967172	-	gi|599150988|gb|EYE90468.1|	-	Nitrogen assimilation transcription factor nit-4
g926	contig_17	2967263	2968246	+	gi|425765367|gb|EKV04065.1|	GO:0046933	ATP synthase subunit 5, mitochondrial	KOG1662
g927	contig_17	2968789	2972071	-	gi|425765366|gb|EKV04064.1|	-	Uncharacterized protein YMR196W	KOG2161
g928	contig_17	2972695	2973240	-	gi|425765365|gb|EKV04063.1|	-	-	-
g929	contig_17	2975456	2977885	+	gi|255946353|ref|XP_002563944.1|	GO:0005515	-	-
g930	contig_17	2978337	2979705	-	gi|255946351|ref|XP_002563943.1|	-	Diphthamide biosynthesis protein 1	KOG2648
g931	contig_17	2979937	2981082	+	gi|425765362|gb|EKV04060.1|	GO:0003824	Hydroxymethylglutaryl-CoA lyase, mitochondrial	KOG2368
g932	contig_17	2981331	2981744	-	gi|584406864|emb|CDM37167.1|	-	Protein FMP21, mitochondrial
g933	contig_17	2981936	2983478	+	gi|255946377|ref|XP_002563956.1|	GO:0030170	Acetylornithine aminotransferase, mitochondrial	KOG1401
g934	contig_17	2983758	2988015	+	gi|425765359|gb|EKV04057.1|	GO:0016787	Protein btn1	KOG3880
g935	contig_17	2988120	2990310	-	gi|255946383|ref|XP_002563959.1|	GO:0004252	Uncharacterized transporter ESBP6	KOG2504
g936	contig_17	2992423	2993793	-	gi|425765355|gb|EKV04053.1|	-	-	-
g937	contig_17	2994525	2996831	+	gi|584406886|emb|CDM37189.1|	GO:0008270	Uncharacterized transcriptional regulatory protein C417.09c
g938	contig_17	2996865	2998879	-	gi|255946391|ref|XP_002563963.1|	-	Probable amino-acid permease meu22	KOG1286
g939	contig_17	2999208	2999991	+	gi|255946393|ref|XP_002563964.1|	GO:0003824	-	-
g940	contig_17	3000417	3001978	+	gi|584406889|emb|CDM37192.1|	GO:0016491	Probable oxidoreductase OrdL
g941	contig_17	3002571	3003319	+	gi|494831477|gb|EON67932.1|	-	CinA-like protein
g942	contig_17	3003548	3005585	-	gi|599151270|gb|EYE90718.1|	GO:0050660	Vanillyl-alcohol oxidase	KOG1231
g943	contig_17	3008445	3009296	-	gi|530461572|gb|EQB44653.1|	-	-	-
g944	contig_17	3010423	3012172	+	gi|584408545|emb|CDM35456.1|	-	Uncharacterized transporter mfs2	KOG0255
g945	contig_17	3013231	3014138	+	gi|255946409|ref|XP_002563972.1|	-	-	-
g946	contig_17	3015373	3017207	+	gi|425768071|gb|EKV06615.1|	GO:0005215	Uncharacterized membrane protein YFL054C	KOG0224
g947	contig_17	3017695	3021322	+	gi|584406899|emb|CDM37203.1|	-	-	-
g948	contig_17	3022363	3024352	+	gi|255946415|ref|XP_002563975.1|	GO:0008415	Carnitine O-acetyltransferase, mitochondrial	KOG3717
g949	contig_17	3025283	3026286	-	gi|425765351|gb|EKV04049.1|	-	-	-
g950	contig_17	3028258	3030060	+	gi|425765392|gb|EKV04088.1|	-	Uncharacterized transporter C794.04c	KOG0255
g951	contig_17	3031416	3032018	+	gi|255946429|ref|XP_002563982.1|	GO:0008124	Putative pterin-4-alpha-carbinolamine dehydratase
g952	contig_17	3032450	3034888	+	gi|255946431|ref|XP_002563983.1|	-	-	-
g953	contig_17	3036311	3037624	-	gi|115384104|ref|XP_001208599.1|	GO:0008565	Translocation protein SEC62	KOG2927
g954	contig_17	3037799	3039684	+	gi|255946435|ref|XP_002563985.1|	-	Maintenance of telomere capping protein 6
g955	contig_17	3040205	3042482	-	gi|255946437|ref|XP_002563986.1|	-	-	-
g956	contig_17	3042682	3044414	+	gi|255946439|ref|XP_002563987.1|	-	NADPH:adrenodoxin oxidoreductase, mitochondrial	KOG1800
g957	contig_17	3044548	3045009	-	gi|255946441|ref|XP_002563988.1|	-	Allergen Asp f 15
g958	contig_17	3046707	3048031	+	gi|255949882|ref|XP_002565708.1|	-	-	-
g959	contig_17	3049795	3051104	+	gi|599160743|gb|EYE99693.1|	GO:0016491	-	-
g960	contig_17	3053301	3054913	-	gi|584406820|emb|CDM37120.1|	-	-	-
g961	contig_17	3058392	3060249	+	gi|531866829|gb|EQL03614.1|	-	Putative bifunctional amine oxidase DDB_G0291301	KOG2820
g962	contig_17	3061861	3063009	+	gi|119488181|ref|XP_001262633.1|	-	-	-
g963	contig_17	3064146	3066426	-	gi|255946445|ref|XP_002563990.1|	GO:0016884	Amidase 1	KOG1211
g964	contig_17	3068491	3069261	+	gi|255946447|ref|XP_002563991.1|	GO:0016491	Aflatoxin biosynthesis ketoreductase nor-1	KOG1611
g965	contig_17	3069380	3071470	-	gi|255946449|ref|XP_002563992.1|	-	L-amino-acid oxidase
g966	contig_17	3072565	3074241	-	gi|391867760|gb|EIT77000.1|	-	Glutathione S-transferase 3
g967	contig_17	3074934	3079174	+	gi|425766332|gb|EKV04948.1|	GO:0016787	AB hydrolase superfamily protein C4A8.06c	KOG1515
g968	contig_17	3079637	3080918	-	gi|255946457|ref|XP_002563996.1|	-	Iron-sulfur protein IND1	KOG3022
g969	contig_17	3081166	3082828	+	gi|584406791|emb|CDM37091.1|	-	Protein bfr2	KOG2773
g970	contig_17	3083016	3083330	-	gi|425766329|gb|EKV04945.1|	-	-	-
g971	contig_17	3083938	3085959	-	gi|255946461|ref|XP_002563998.1|	GO:0008270	-	-
g972	contig_17	3086501	3087627	+	gi|255946463|ref|XP_002563999.1|	GO:0016491	Uncharacterized oxidoreductase YisS	KOG2742
g973	contig_17	3088152	3093126	+	gi|599152762|gb|EYE92100.1|	-	Uncharacterized protein C16H5.12c
g974	contig_17	3094195	3096085	-	gi|255946469|ref|XP_002564002.1|	GO:0046983	AP-1-like transcription factor
g975	contig_17	3097371	3098302	+	gi|169769318|ref|XP_001819129.1|	-	Splicing factor spf30	KOG3026
g976	contig_17	3099051	3103006	+	gi|584406785|emb|CDM37085.1|	GO:0008158	Niemann-Pick type C-related protein 1	KOG1933
g977	contig_17	3103673	3107213	+	gi|255946475|ref|XP_002564005.1|	GO:0008565	Probable importin subunit beta-4	KOG2171
g978	contig_17	3107783	3110520	+	gi|584406781|emb|CDM37081.1|	GO:0008270	Uncharacterized transcriptional regulatory protein C3C7.04
g979	contig_17	3111187	3112015	-	gi|584406780|emb|CDM37080.1|	GO:0016455	Mediator of RNA polymerase II transcription subunit 7	KOG0570
g980	contig_17	3112115	3113285	+	gi|584406779|emb|CDM37079.1|	GO:0003824	Probable diacylglycerol pyrophosphate phosphatase 1	KOG3030
g981	contig_17	3113466	3114260	-	gi|584406778|emb|CDM37078.1|	GO:0016876	Alanyl-tRNA editing protein AlaX-L
g982	contig_17	3114773	3115749	+	gi|255946489|ref|XP_002564012.1|	GO:0016810	-	-
g983	contig_17	3115966	3117678	+	gi|255946491|ref|XP_002564013.1|	GO:0008270	-	-
g984	contig_17	3118359	3120280	+	gi|255946493|ref|XP_002564014.1|	-	-	-
g985	contig_17	3120659	3121941	+	gi|584406773|emb|CDM37073.1|	GO:0003779	F-actin-capping protein subunit alpha	KOG0836
g986	contig_17	3122406	3123199	+	gi|255946497|ref|XP_002564016.1|	-	-	-
g987	contig_17	3125402	3126157	+	gi|584406770|emb|CDM37070.1|	-	-	-
g988	contig_17	3126306	3126830	-	gi|255946501|ref|XP_002564018.1|	-	-	-
g989	contig_17	3127162	3128193	-	gi|584406767|emb|CDM37067.1|	GO:0051287	D-3-phosphoglycerate dehydrogenase	KOG0068
g990	contig_17	3128360	3129065	-	gi|584406766|emb|CDM37066.1|	GO:0008080	-	-
g991	contig_17	3129675	3130421	-	gi|525582100|gb|EPS28350.1|	GO:0003796	N,O-diacetylmuramidase
g992	contig_17	3131083	3133181	+	gi|425766311|gb|EKV04927.1|	GO:0008270	Protein STB5
g993	contig_17	3133647	3134066	+	gi|512668510|ref|WP_016471261.1|	-	-	-
g994	contig_17	3134250	3135641	+	gi|584406761|emb|CDM37061.1|	GO:0016787	Probable guanine deaminase	KOG3968
g995	contig_17	3135852	3138395	-	gi|255946515|ref|XP_002564025.1|	-	Glutathione transporter 1	KOG2262
g996	contig_17	3138920	3140050	+	gi|255946517|ref|XP_002564026.1|	GO:0016491	D-amino-acid oxidase	KOG3923
g997	contig_17	3140564	3142582	+	gi|425766316|gb|EKV04932.1|	GO:0005524	Two-component system protein A	KOG0519
g998	contig_17	3144403	3146551	+	gi|425775489|gb|EKV13757.1|	GO:0008236	Tripeptidyl-peptidase sed1
g999	contig_17	3148296	3149915	+	gi|425766403|gb|EKV05016.1|	-	Aldehyde reductase 1	KOG1577
g1000	contig_17	3150375	3151579	-	gi|255946527|ref|XP_002564031.1|	-	Protein ecm33
g1001	contig_17	3152196	3153555	+	gi|83768708|dbj|BAE58845.1|	-	-	-
g1002	contig_17	3154660	3160734	+	gi|317140077|ref|XP_003189233.1|	-	Vegetative incompatibility protein HET-E-1	KOG0266
g1003	contig_17	3162492	3163494	-	gi|255946535|ref|XP_002564035.1|	GO:0003824	CaiB/baiF CoA-transferase family protein C7orf10 homolog	KOG3957
g1004	contig_17	3164406	3165726	-	gi|255946537|ref|XP_002564036.1|	GO:0016627	Acyl-CoA dehydrogenase fadE12	KOG0139
g1005	contig_17	3165998	3167599	+	gi|238488839|ref|XP_002375657.1|	GO:0050661	Cyclopentanone 1,2-monooxygenase	KOG1399
g1006	contig_17	3167744	3169695	-	gi|526203940|gb|EPS44194.1|	-	-	-
g1007	contig_17	3169977	3170868	-	gi|169766206|ref|XP_001817574.1|	GO:0003824	Carnitinyl-CoA dehydratase	KOG1680
g1008	contig_17	3171177	3172635	+	gi|255946541|ref|XP_002564038.1|	GO:0016747	Non-specific lipid-transfer protein	KOG1406
g1009	contig_17	3173087	3173662	-	gi|584406747|emb|CDM37047.1|	GO:0016846	Putative glutathione-dependent formaldehyde-activating enzyme
g1010	contig_17	3174264	3175752	+	gi|584406746|emb|CDM37046.1|	-	-	-
g1011	contig_17	3178611	3179067	-	gi|255933790|ref|XP_002558274.1|	-	-	-
g1012	contig_17	3179771	3180676	+	gi|119483842|ref|XP_001261824.1|	-	NAD(P)H azoreductase
g1013	contig_17	3182381	3182891	+	gi|255931017|ref|XP_002557065.1|	-	4-carboxymuconolactone decarboxylase
g1014	contig_17	3184046	3185980	+	gi|255931019|ref|XP_002557066.1|	-	-	-
g1015	contig_17	3190589	3195700	-	gi|317029240|ref|XP_001391076.2|	GO:0042626	Multidrug resistance protein CDR1	KOG0065
g1016	contig_17	3196558	3197256	+	gi|119474233|ref|XP_001258992.1|	-	-	-
g1017	contig_17	3197878	3201328	+	gi|358371758|dbj|GAA88365.1|	GO:0020037	Bifunctional P-450:NADPH-P450 reductase	KOG1158
g1018	contig_17	3203327	3204050	-	gi|599151678|gb|EYE91096.1|	-	-	-
g1019	contig_17	3206872	3210216	+	gi|255948376|ref|XP_002564955.1|	GO:0048037	Linear gramicidin synthase subunit D	KOG1178
g1020	contig_17	3219362	3221365	+	gi|317029242|ref|XP_001391078.2|	GO:0008270	Uncharacterized transcriptional regulatory protein C11D3.07c
g1021	contig_17	3222390	3230096	-	gi|115389234|ref|XP_001212122.1|	GO:0048037	Nonribosomal peptide synthetase 3	KOG1178
g1022	contig_17	3231002	3231699	+	gi|115389236|ref|XP_001212123.1|	-	-	-
g1023	contig_17	3232679	3233749	-	gi|115389238|ref|XP_001212124.1|	GO:0016491	Trans-2-enoyl-CoA reductase, mitochondrial	KOG0025
g1024	contig_17	3234360	3236162	+	gi|525585793|gb|EPS32043.1|	-	Putative HC-toxin efflux carrier TOXA	KOG0254
g1025	contig_17	3236902	3239267	-	gi|525585792|gb|EPS32042.1|	GO:0008270	Putative transcriptional regulatory protein YJL206C
g1026	contig_17	3242489	3243171	+	gi|255938203|ref|XP_002559872.1|	-	-	-
g1027	contig_17	3244086	3245977	-	gi|599153733|gb|EYE93022.1|	GO:0005215	Peptide transporter PTR2	KOG1237
g1028	contig_17	3248082	3249014	-	gi|212530208|ref|XP_002145261.1|	GO:0016491	Uncharacterized oxidoreductase YusZ	KOG1205
g1029	contig_17	3253555	3254048	-	gi|169783246|ref|XP_001826085.1|	-	-	-
g1030	contig_17	3254988	3255633	+	gi|317156891|ref|XP_001826084.2|	-	-	-
g1031	contig_17	3258030	3258758	+	gi|238488809|ref|XP_002375642.1|	-	-	-
g1032	contig_17	3264828	3266269	-	gi|115383832|ref|XP_001208463.1|	-	Uncharacterized transporter C1529.01	KOG0255
g1033	contig_17	3267859	3268727	+	gi|317139258|ref|XP_001817374.2|	-	Gentisate 1,2-dioxygenase
g1034	contig_17	3269919	3271073	-	gi|238482419|ref|XP_002372448.1|	-	Gentisate 1,2-dioxygenase
g1035	contig_17	3271401	3273112	+	gi|317139256|ref|XP_001817373.2|	GO:0004497	3-hydroxybenzoate 6-hydroxylase 1	KOG2614
g1036	contig_17	3274269	3275388	+	gi|242796751|ref|XP_002482866.1|	GO:0003824	Uncharacterized protein AF_2225	KOG1535
g1037	contig_17	3275861	3278435	+	gi|317139260|ref|XP_001817376.2|	GO:0008270	Transcriptional activator protein acu-15
g1038	contig_17	3280114	3281748	-	gi|255942679|ref|XP_002562108.1|	GO:0016491	Vanillin dehydrogenase	KOG2451
g1039	contig_17	3282399	3283165	+	gi|119490134|ref|XP_001262981.1|	-	Uncharacterized protein AN9274
g1040	contig_17	3285124	3285566	-	gi|589988995|gb|EXJ71806.1|	-	Pisatin demethylase	KOG0158
g1041	contig_17	3286247	3287993	+	gi|358367539|dbj|GAA84158.1|	-	Lignostilbene-alpha,beta-dioxygenase isozyme III	KOG1285
g1042	contig_17	3288239	3289005	+	gi|255952226|ref|XP_002566879.1|	-	-	-
g1043	contig_17	3289580	3290134	-	gi|83584384|gb|ABC24968.1|	-	-	-
g1044	contig_17	3293285	3302535	+	gi|154287136|ref|XP_001544363.1|	GO:0008026	ATP-dependent DNA helicase Q5	KOG0351
g1045	contig_52	323	4833	-	gi|255940988|ref|XP_002561263.1|	GO:0003677	Retrovirus-related Pol polyprotein from transposon TNT 1-94	KOG0017
g1046	contig_52	6102	7159	+	gi|584408445|emb|CDM35355.1|	-	INO80 complex subunit 2
g1047	contig_52	7627	7917	-	gi|584408441|emb|CDM35351.1|	-	-	-
g1048	contig_52	8198	15154	+	gi|255932055|ref|XP_002557584.1|	-	Protein mms22
g1049	contig_52	19389	23579	-	gi|584408447|emb|CDM35357.1|	-	Protein transport protein sec31	KOG0307
g1050	contig_52	23989	24503	+	gi|255932047|ref|XP_002557580.1|	GO:0003676	Peptidyl-prolyl cis-trans isomerase E	KOG0111
g1051	contig_52	24788	25393	-	gi|425774153|gb|EKV12470.1|	-	-	-
g1052	contig_52	25665	26304	+	gi|255932045|ref|XP_002557579.1|	GO:0004129	Cytochrome c oxidase subunit 6B	KOG3057
g1053	contig_52	26953	28145	-	gi|255932043|ref|XP_002557578.1|	-	Mitochondrial dicarboxylate transporter	KOG0759
g1054	contig_52	29185	30729	+	gi|584408452|emb|CDM35362.1|	GO:0005524	Phenylalanine--tRNA ligase, mitochondrial	KOG2783
g1055	contig_52	31250	32076	-	gi|255932039|ref|XP_002557576.1|	GO:0051087	GrpE protein homolog, mitochondrial	KOG3003
g1056	contig_52	32435	33397	-	gi|71001912|ref|XP_755637.1|	GO:0016787	Carboxylesterase NlhH	KOG1515
g1057	contig_52	33814	35603	-	gi|584408454|emb|CDM35364.1|	-	Low-affinity methionine permease	KOG1287
g1058	contig_52	39213	43805	-	gi|115433396|ref|XP_001216835.1|	GO:0050660	Cytochrome P450 3A43
g1059	contig_52	45873	46727	+	gi|584408458|emb|CDM35368.1|	-	Calcipressin-like protein
g1060	contig_52	47245	49437	-	gi|425777645|gb|EKV15804.1|	GO:0051287	NAD-dependent malic enzyme, mitochondrial	KOG1257
g1061	contig_52	49816	51705	-	gi|212544218|ref|XP_002152263.1|	GO:0005215	Putative purine permease C1399.01c	KOG1292
g1062	contig_52	51978	53561	+	gi|242811813|ref|XP_002485828.1|	GO:0016787	Uncharacterized protein C1F8.04c	KOG3968
g1063	contig_52	54159	56625	-	gi|425774142|gb|EKV12459.1|	GO:0046983	DNA-directed RNA polymerase II subunit RPB3	KOG1522
g1064	contig_52	57538	59401	+	gi|255932019|ref|XP_002557566.1|	GO:0004057	Arginyl-tRNA--protein transferase 1	KOG1193
g1065	contig_52	59930	61169	-	gi|238497716|ref|XP_002380093.1|	GO:0008716	D-alanine--D-alanine ligase
g1066	contig_52	62364	64302	-	gi|584408462|emb|CDM35372.1|	-	-	-
g1067	contig_52	65081	65710	-	gi|255932013|ref|XP_002557563.1|	GO:0020037	Cytochrome c	KOG3453
g1068	contig_52	66904	67740	+	gi|255932011|ref|XP_002557562.1|	-	-	-
g1069	contig_52	68125	69379	-	gi|425774135|gb|EKV12452.1|	-	Exosome complex component RRP42	KOG1612
g1070	contig_52	70633	72974	-	gi|255932007|ref|XP_002557560.1|	GO:0005524	Sporulation protein kinase pit1	KOG0661
g1071	contig_52	77445	78541	+	gi|584408468|emb|CDM35378.1|	-	-	-
g1072	contig_52	79377	81471	+	gi|255931999|ref|XP_002557556.1|	-	-	-
g1073	contig_52	81894	83151	-	gi|525587482|gb|EPS33732.1|	-	-	-
g1074	contig_52	83516	84196	-	gi|255931995|ref|XP_002557554.1|	GO:0016787	Bifunctional protein RIB2	KOG1018
g1075	contig_52	84576	85539	+	gi|255931993|ref|XP_002557553.1|	GO:0031072	DnaJ homolog subfamily C member 9	KOG0719
g1076	contig_52	86082	88166	+	gi|584408473|emb|CDM35383.1|	-	Uncharacterized protein C167.05
g1077	contig_52	88597	90371	+	gi|255949014|ref|XP_002565274.1|	GO:0046961	V-type proton ATPase subunit B	KOG1351
g1078	contig_52	91033	93321	-	gi|584408475|emb|CDM35385.1|	GO:0030170	Tryptophan synthase	KOG4175
g1079	contig_52	94389	95554	+	gi|255948996|ref|XP_002565265.1|	GO:0016491	Zinc-type alcohol dehydrogenase-like protein C1773.06c	KOG1198
g1080	contig_52	95787	96559	+	gi|255948998|ref|XP_002565266.1|	-	-	-
g1081	contig_52	102334	107528	+	gi|425774124|gb|EKV12441.1|	-	-	-
g1082	contig_52	110648	110972	+	-	-	-	-
g1083	contig_52	113292	118001	+	gi|255948992|ref|XP_002565263.1|	GO:0005515	GYF domain-containing protein mpd2	KOG1862
g1084	contig_52	119106	120264	-	gi|255948986|ref|XP_002565260.1|	GO:0005215	Uncharacterized membrane protein YFL054C	KOG0224
g1085	contig_52	121795	123950	+	gi|255948984|ref|XP_002565259.1|	GO:0016773	Putative glycerol kinase 3	KOG2517
g1086	contig_52	124345	126051	-	gi|255948982|ref|XP_002565258.1|	GO:0020037	Cytochrome P450 52A1	KOG0157
g1087	contig_52	127279	128784	+	gi|584408485|emb|CDM35396.1|	-	Nuclear polyadenylated RNA-binding protein NAB2	KOG3702
g1088	contig_52	129173	131141	+	gi|584408486|emb|CDM35397.1|	-	Protoporphyrinogen oxidase	KOG1276
g1089	contig_52	131754	132365	-	gi|255948976|ref|XP_002565255.1|	GO:0005515	Partner of Y14 and mago
g1090	contig_52	132633	133143	+	gi|425775014|gb|EKV13304.1|	GO:0008121	Cytochrome b-c1 complex subunit 9
g1091	contig_52	133763	140278	+	gi|584408489|emb|CDM35400.1|	GO:0008270	E3 ubiquitin-protein ligase ubr1	KOG1140
g1092	contig_52	140804	142490	+	gi|255948970|ref|XP_002565252.1|	-	-	-
g1093	contig_52	145285	146529	+	gi|584408491|emb|CDM35402.1|	-	-	-
g1094	contig_52	147224	149503	-	gi|584408492|emb|CDM35403.1|	-	Exocyst complex component sec6	KOG2286
g1095	contig_52	150035	150319	+	gi|584408493|emb|CDM35404.1|	GO:0003735	54S ribosomal protein L33, mitochondrial
g1096	contig_52	151225	152373	-	gi|115436968|ref|XP_001217691.1|	-	Putative aryl-alcohol dehydrogenase AAD14	KOG1575
g1097	contig_52	152744	159838	-	gi|115436964|ref|XP_001217690.1|	GO:0048037	Nonribosomal peptide synthetase 1	KOG1176
g1098	contig_52	161349	162529	+	gi|115436960|ref|XP_001217689.1|	-	Phospho-2-dehydro-3-deoxyheptonate aldolase, tyrosine-inhibited
g1099	contig_52	165473	166375	-	gi|378727450|gb|EHY53909.1|	-	-	-
g1100	contig_52	167548	174926	+	gi|115436950|ref|XP_001217686.1|	GO:0048037	Nonribosomal peptide synthetase 1	KOG1176
g1101	contig_52	176411	177302	-	gi|255948954|ref|XP_002565244.1|	-	-	-
g1102	contig_52	179117	180751	+	gi|358366393|dbj|GAA83014.1|	GO:0003824	Homocitrate synthase, mitochondrial	KOG2367
g1103	contig_52	181313	183215	+	gi|255948958|ref|XP_002565246.1|	GO:0030170	Sphingosine-1-phosphate lyase	KOG1383
g1104	contig_52	184112	184849	+	gi|391862990|gb|EIT72307.1|	GO:0004826	-	-
g1105	contig_52	185314	186014	+	gi|255948950|ref|XP_002565242.1|	GO:0004045	Probable peptidyl-tRNA hydrolase 2	KOG3282
g1106	contig_52	186725	188728	+	gi|584408499|emb|CDM35410.1|	-	U4/U6.U5 tri-snRNP-associated protein snu66	KOG2217
g1107	contig_52	189421	191030	+	gi|425775026|gb|EKV13316.1|	GO:0030170	Aspartate aminotransferase, mitochondrial	KOG1411
g1108	contig_52	191560	193975	-	gi|425775027|gb|EKV13317.1|	-	Sporulation protein RMD8	KOG2861
g1109	contig_52	194620	196650	-	gi|425775028|gb|EKV13318.1|	-	-	-
g1110	contig_52	202848	204019	-	-	-	-	-
g1111	contig_52	206581	208534	-	gi|255948916|ref|XP_002565225.1|	GO:0008270	Zinc finger protein with KRAB and SCAN domains 3	KOG1721
g1112	contig_52	212454	213884	-	gi|255948912|ref|XP_002565223.1|	GO:0016757	-	-
g1113	contig_52	215673	217786	+	gi|255948910|ref|XP_002565222.1|	GO:0008312	Signal recognition particle 72 kDa protein	KOG2376
g1114	contig_52	218147	219442	-	gi|584408525|emb|CDM35436.1|	GO:0016491	-	-
g1115	contig_52	220408	222585	+	gi|425780966|gb|EKV18949.1|	-	-	-
g1116	contig_52	223694	228688	+	gi|255948898|ref|XP_002565216.1|	GO:0046872	Probable phospholipid-transporting ATPase DNF3	KOG0206
g1117	contig_52	230534	230950	-	gi|255955897|ref|XP_002568701.1|	-	-	-
g1118	contig_52	231560	232293	+	gi|255955895|ref|XP_002568700.1|	-	-	-
g1119	contig_52	234347	240575	+	gi|317136588|ref|XP_001727157.2|	-	-	-
g1120	contig_52	243189	244106	-	gi|169763854|ref|XP_001727827.1|	-	NmrA-like family domain-containing protein DDB_G0286605
g1121	contig_52	244387	245669	+	gi|350640024|gb|EHA28377.1|	GO:0008270	-	-
g1122	contig_52	245804	246529	-	gi|584408535|emb|CDM35446.1|	GO:0008080	-	-
g1123	contig_52	250245	257714	+	gi|255948876|ref|XP_002565205.1|	GO:0043565	Uncharacterized aminotransferase C1771.03c	KOG0486
g1124	contig_52	258667	259422	-	gi|525582750|gb|EPS29000.1|	-	Phosphatidylglycerophosphatase GEP4, mitochondrial	KOG2961
g1125	contig_52	259762	260488	+	gi|115492327|ref|XP_001210791.1|	-	Small nuclear ribonucleoprotein Sm D3	KOG3172
g1126	contig_52	261036	262508	+	gi|425774884|gb|EKV13177.1|	-	-	-
g1127	contig_52	262804	263610	-	gi|425774889|gb|EKV13182.1|	-	Probable very-long-chain (3R)-3-hydroxyacyl-[acyl-carrier protein] dehydratase	KOG3187
g1128	contig_52	266131	266843	+	gi|255948856|ref|XP_002565195.1|	GO:0004871	Multistep phosphorelay regulator 1	KOG4747
g1129	contig_52	270546	271198	+	gi|525582757|gb|EPS29007.1|	-	-	-
g1130	contig_52	271379	275129	-	gi|255948862|ref|XP_002565198.1|	-	Calcium uniporter protein, mitochondrial	KOG2966
g1131	contig_52	277007	278864	-	gi|255948836|ref|XP_002565185.1|	GO:0003824	Protein farnesyltransferase subunit beta	KOG0365
g1132	contig_52	280091	282563	+	gi|425774855|gb|EKV13150.1|	-	-	-
g1133	contig_52	283857	287827	+	gi|584408560|emb|CDM35471.1|	GO:0008270	Polyubiquitin	KOG0804
g1134	contig_52	288183	289256	-	gi|584408561|emb|CDM35472.1|	-	Hexaprenyldihydroxybenzoate methyltransferase, mitochondrial	KOG1270
g1135	contig_52	290410	292266	-	gi|584408562|emb|CDM35473.1|	GO:0008270	Probable sucrose utilization protein SUC1
g1136	contig_52	293981	297126	+	gi|584408563|emb|CDM35474.1|	GO:0004553	Alpha-glucosidase	KOG1065
g1137	contig_52	298220	300169	+	gi|584408564|emb|CDM35475.1|	GO:0043169	Alpha-amylase A type-3	KOG0471
g1138	contig_52	300478	302761	-	gi|255948820|ref|XP_002565177.1|	GO:0008270	Transcriptional activator of proteases prtT
g1139	contig_52	306204	307540	+	gi|255950410|ref|XP_002565972.1|	GO:0016758	-	-
g1140	contig_52	313496	314615	-	gi|255948810|ref|XP_002565172.1|	GO:0043565	Homeobox protein TGIF2LX	KOG0773
g1141	contig_52	318264	319391	-	gi|425777147|gb|EKV15331.1|	-	-	-
g1142	contig_52	321356	327115	-	gi|255948806|ref|XP_002565170.1|	GO:0016491	Uncharacterized FAD-binding protein C12C2.03c	KOG1158
g1143	contig_52	329895	330686	+	gi|255948798|ref|XP_002565166.1|	-	-	-
g1144	contig_52	330902	332914	-	gi|255948796|ref|XP_002565165.1|	GO:0005509	Endoplasmic reticulum mannosyl-oligosaccharide 1,2-alpha-mannosidase	KOG2431
g1145	contig_52	334222	335286	+	gi|584408578|emb|CDM35489.1|	GO:0016455	-	-
g1146	contig_52	335672	336536	-	gi|119196077|ref|XP_001248642.1|	-	Calmodulin	KOG0027
g1147	contig_52	337422	338918	+	gi|584408580|emb|CDM35491.1|	GO:0005515	t-SNARE affecting a late Golgi compartment protein 2	KOG0809
g1148	contig_52	339811	341284	-	gi|425774807|gb|EKV13106.1|	-	UPF0400 protein C337.03	KOG2669
g1149	contig_52	341548	342682	+	gi|584408582|emb|CDM35493.1|	GO:0005198	Clathrin light chain	KOG4031
g1150	contig_52	343027	344520	-	gi|425774809|gb|EKV13108.1|	-	Hsp90 co-chaperone Cdc37	KOG2260
g1151	contig_52	344966	347433	+	gi|584408584|emb|CDM35495.1|	GO:0042626	ATP-dependent permease MDL1, mitochondrial	KOG0058
g1152	contig_52	347785	348602	-	gi|317038734|ref|XP_001402076.2|	-	UPF0045 protein ECM15
g1153	contig_52	349371	350497	+	gi|584408598|emb|CDM35509.1|	GO:0035299	Inositol-pentakisphosphate 2-kinase
g1154	contig_52	351599	352392	-	-	-	-	-
g1155	contig_52	352705	353454	+	gi|255948752|ref|XP_002565143.1|	GO:0016787	Nudix hydrolase 1
g1156	contig_52	353738	354484	-	gi|255948758|ref|XP_002565146.1|	-	-	-
g1157	contig_52	354934	355505	+	gi|584408596|emb|CDM35507.1|	-	Glyoxalase domain-containing protein 5
g1158	contig_52	355599	356257	-	gi|557723381|dbj|GAD97855.1|	-	-	-
g1159	contig_52	357410	358329	+	gi|358373139|dbj|GAA89739.1|	-	-	-
g1160	contig_52	360198	360991	+	gi|255948766|ref|XP_002565150.1|	GO:0016491	Putative nitroreductase HBN1
g1161	contig_52	361487	364230	-	gi|425774814|gb|EKV13113.1|	GO:0016810	UPF0674 endoplasmic reticulum membrane protein YNR021W	KOG2357
g1162	contig_52	364655	366362	-	gi|584408588|emb|CDM35499.1|	-	Mitochondrial distribution and morphology protein 34 2
g1163	contig_52	367425	369403	+	gi|255948776|ref|XP_002565155.1|	-	Putative serine/threonine-protein kinase haspin homolog	KOG2464
g1164	contig_52	370616	372523	-	gi|255936033|ref|XP_002559043.1|	-	Uncharacterized protein AN12072
g1165	contig_52	373271	374584	-	gi|255936031|ref|XP_002559042.1|	GO:0005524	Protein MSP1	KOG0737
g1166	contig_52	374816	376505	+	gi|255936029|ref|XP_002559041.1|	GO:0005515	-	-
g1167	contig_52	376813	380003	+	gi|584415060|emb|CDM26752.1|	GO:0016740	GPI ethanolamine phosphate transferase 1	KOG2124
g1168	contig_52	382907	386324	+	gi|584415059|emb|CDM26751.1|	GO:0008270	Cutinase transcription factor 1 alpha
g1169	contig_52	387782	388974	-	gi|255936021|ref|XP_002559037.1|	GO:0015299	Cation/H(+) antiporter 17
g1170	contig_52	389755	391193	+	gi|255936019|ref|XP_002559036.1|	GO:0030170	Cystathionine beta-lyase	KOG0053
g1171	contig_52	391510	392530	+	gi|525584484|gb|EPS30734.1|	-	Uncharacterized membrane protein C365.16
g1172	contig_52	394753	398101	-	gi|584415053|emb|CDM26745.1|	GO:0050660	Ferric/cupric reductase transmembrane component 7	KOG0039
g1173	contig_52	398821	400484	-	gi|255936013|ref|XP_002559033.1|	GO:0030170	Putative siderophore biosynthesis protein SbnA
g1174	contig_52	401342	403312	+	gi|584415051|emb|CDM26743.1|	-	Uncharacterized transporter C3H1.06c	KOG0254
g1175	contig_52	403805	406156	+	gi|584415049|emb|CDM26741.1|	-	E3 ubiquitin-protein ligase RNF216	KOG1812
g1176	contig_52	406531	408144	-	gi|525584468|gb|EPS30718.1|	-	-	-
g1177	contig_52	409017	411882	-	gi|255936003|ref|XP_002559028.1|	GO:0016491	Peroxisomal hydratase-dehydrogenase-epimerase	KOG1206
g1178	contig_52	412653	413871	+	gi|584415045|emb|CDM26736.1|	-	Uncharacterized kinase mug58	KOG2878
g1179	contig_52	414480	416053	-	gi|584415044|emb|CDM26735.1|	GO:0003735	60S ribosomal protein L7	KOG3184
g1180	contig_52	416344	417191	+	gi|255935997|ref|XP_002559025.1|	-	Vacuolar-sorting protein SNF8	KOG3341
g1181	contig_52	418060	418904	+	gi|115433184|ref|XP_001216729.1|	-	Protein alcS_x0001_sp|B0YBR5.2|ALCS_ASPFC RecName: Full=Protein alcS
g1182	contig_52	419390	420772	+	gi|584415042|emb|CDM26733.1|	GO:0003995	Dibenzothiophene desulfurization enzyme C
g1183	contig_52	421033	422045	+	gi|169784163|ref|XP_001826543.1|	-	Xanthine phosphoribosyltransferase 1
g1184	contig_52	422626	423063	-	gi|525584529|gb|EPS30779.1|	-	Dolichol-phosphate mannosyltransferase subunit 3
g1185	contig_52	423682	426039	+	gi|584415038|emb|CDM26729.1|	-	Rap1 GTPase-GDP dissociation stimulator 1-A	KOG4500
g1186	contig_52	426339	427621	-	gi|584415037|emb|CDM26728.1|	-	-	-
g1187	contig_52	428348	430503	+	gi|584415036|emb|CDM26727.1|	-	ABC1 family protein YPL109C, mitochondrial	KOG1236
g1188	contig_52	430864	431968	-	gi|255935981|ref|XP_002559017.1|	GO:0004408	Cytochrome c heme lyase	KOG3996
g1189	contig_52	432488	434245	-	gi|255935975|ref|XP_002559014.1|	-	SAM50-like protein SPAC17C9.06	KOG2602
g1190	contig_52	434484	435433	+	gi|584415033|emb|CDM26724.1|	GO:0016881	Ubiquitin-conjugating enzyme E2 6	KOG0894
g1191	contig_52	435922	439323	+	gi|584415031|emb|CDM26722.1|	-	Protein transport protein yip1	KOG3103
g1192	contig_52	439624	441897	-	gi|255935971|ref|XP_002559012.1|	-	Ubiquitin fusion degradation protein 1	KOG1816
g1193	contig_52	442353	443900	-	gi|584415029|emb|CDM26720.1|	-	-	-
g1194	contig_52	445095	446381	-	gi|525584588|gb|EPS30838.1|	GO:0005524	26S protease regulatory subunit 8 homolog	KOG0728
g1195	contig_52	447105	450625	+	gi|584415027|emb|CDM26718.1|	-	Low affinity vacuolar monovalent cation/H(+) antiporter	KOG1397
g1196	contig_52	450962	452903	-	gi|255935963|ref|XP_002559008.1|	GO:0016773	Uncharacterized sugar kinase YDR109C	KOG2517
g1197	contig_52	453447	454066	+	gi|584415025|emb|CDM26716.1|	-	-	-
g1198	contig_52	454968	458729	+	gi|302893789|ref|XP_003045775.1|	-	Uncharacterized protein MTH_1421
g1199	contig_52	459446	461782	-	gi|584415023|emb|CDM26714.1|	GO:0004725	Tyrosine-protein phosphatase 1	KOG0789
g1200	contig_52	462773	463239	-	gi|255935953|ref|XP_002559003.1|	-	Cytochrome c oxidase assembly protein cox16, mitochondrial
g1201	contig_52	463690	467128	+	gi|584415021|emb|CDM26712.1|	-	Nucleoporin NIC96	KOG2168
g1202	contig_52	467422	469287	+	gi|584415020|emb|CDM26711.1|	GO:0008703	2,5-diamino-6-ribosylamino-4(3H)-pyrimidinone 5'-phosphate reductase
g1203	contig_52	469559	471182	+	gi|425777731|gb|EKV15887.1|	-	Protein pim1	KOG1426
g1204	contig_52	471540	472443	-	gi|255935945|ref|XP_002558999.1|	-	Chromosome segregation in meiosis protein 3	KOG3004
g1205	contig_52	472759	473572	+	gi|255935943|ref|XP_002558998.1|	-	NADH-ubiquinone oxidoreductase 21 kDa subunit
g1206	contig_52	473773	474586	-	gi|584415016|emb|CDM26707.1|	GO:0016787	tRNA-specific adenosine deaminase subunit tad2	KOG1018
g1207	contig_52	474960	482849	+	gi|255935939|ref|XP_002558996.1|	GO:0016773	Protein kinase rad3	KOG0890
g1208	contig_52	482989	490285	-	gi|255935935|ref|XP_002558994.1|	GO:0005524	ATPase family gene 2 protein	KOG0730
g1209	contig_52	490807	491860	+	gi|195929347|gb|ACG56268.1|	GO:0016491	Methylsterol monooxygenase	KOG0873
g1210	contig_52	529582	531370	-	gi|584415211|emb|CDM26903.1|	GO:0005515	COP9 signalosome complex subunit 3	KOG2582
g1211	contig_52	531748	533232	+	gi|584415212|emb|CDM26904.1|	GO:0016491	Probable gamma-glutamyl phosphate reductase	KOG4165
g1212	contig_52	533529	536051	-	gi|539432915|gb|ERF69746.1|	-	60S ribosomal protein L18-B	KOG0752
g1213	contig_52	536824	542873	+	gi|255935917|ref|XP_002558985.1|	GO:0016787	Uncharacterized protein C11D3.15	KOG1939
g1214	contig_52	543269	543746	-	gi|584415217|emb|CDM26909.1|	GO:0003713	Putative RNA polymerase II transcriptional coactivator	KOG2712
g1215	contig_52	543982	550895	-	gi|212532549|ref|XP_002146431.1|	GO:0046872	Probable phospholipase C20G8.02, mitochondrial	KOG2712
g1216	contig_52	551681	553902	+	gi|584415220|emb|CDM26912.1|	GO:0005515	Fimbrin	KOG0046
g1217	contig_52	554167	555068	-	gi|255935909|ref|XP_002558981.1|	GO:0016787	Protein AIM2	KOG3043
g1218	contig_52	555716	557443	-	gi|584415223|emb|CDM26915.1|	-	Sterol O-acyltransferase 2	KOG0380
g1219	contig_52	557817	558826	+	gi|584415224|emb|CDM26916.1|	-	-	-
g1220	contig_52	559001	560499	-	gi|255935903|ref|XP_002558978.1|	GO:0030145	Probable Xaa-Pro aminopeptidase pepP	KOG2737
g1221	contig_52	560647	562137	-	gi|584415226|emb|CDM26918.1|	-	-	-
g1222	contig_52	562667	564653	+	gi|255941698|ref|XP_002561618.1|	GO:0008270	Nitrogen assimilation transcription factor nit-4
g1223	contig_52	565134	568563	-	gi|584415230|emb|CDM26922.1|	-	-	-
g1224	contig_52	569565	571879	+	gi|255935895|ref|XP_002558974.1|	GO:0008270	Leukotriene A-4 hydrolase homolog	KOG1047
g1225	contig_52	572082	573070	-	gi|255935893|ref|XP_002558973.1|	-	Protein CBP3, mitochondrial	KOG2873
g1226	contig_52	573740	574669	-	gi|584415233|emb|CDM26925.1|	-	TIP41-like protein	KOG3224
g1227	contig_52	575261	576520	+	gi|425782733|gb|EKV20626.1|	GO:0005524	Serine/threonine-protein kinase ark1	KOG0580
g1228	contig_52	576806	577655	-	gi|255935887|ref|XP_002558970.1|	GO:0004222	Mitochondrial inner membrane protease atp23	KOG3314
g1229	contig_52	577871	579398	+	gi|584415236|emb|CDM26928.1|	GO:0003723	Probable glutamate 5-kinase	KOG1154
g1230	contig_52	579708	580813	-	gi|584415237|emb|CDM26929.1|	-	-	-
g1231	contig_52	581009	582013	+	gi|255935881|ref|XP_002558967.1|	-	Signal recognition particle receptor subunit beta	KOG0090
g1232	contig_52	582153	583261	-	gi|317157468|ref|XP_001826491.2|	GO:0016491	Uncharacterized oxidoreductase C736.13	KOG1208
g1233	contig_52	583704	585429	-	gi|425772299|gb|EKV10709.1|	GO:0030170	Cystathionine beta-synthase	KOG1252
g1234	contig_52	586581	588027	+	gi|255935877|ref|XP_002558965.1|	-	Vacuolar cation/proton exchanger 5	KOG1397
g1235	contig_52	588218	593360	-	gi|584415244|emb|CDM26936.1|	GO:0019901	PHO85 cyclin-7
g1236	contig_52	594498	596866	+	gi|255935869|ref|XP_002558961.1|	GO:0008270	Palmitoyltransferase akr1	KOG0509
g1237	contig_52	598631	600152	-	gi|255935867|ref|XP_002558960.1|	-	L-ornithine 5-monooxygenase	KOG1399
g1238	contig_52	601525	616940	+	gi|584415248|emb|CDM26940.1|	GO:0048037	Hydroxamate-type ferrichrome siderophore peptide synthetase	KOG1178
g1239	contig_52	618594	621746	+	gi|255935863|ref|XP_002558958.1|	GO:0005524	Mitosis inhibitor protein kinase wee1	KOG0601
g1240	contig_52	623160	626537	+	gi|255935861|ref|XP_002558957.1|	GO:0008026	Pre-mRNA-splicing factor ATP-dependent RNA helicase-like protein cdc28	KOG0923
g1241	contig_52	628215	630458	-	gi|255940988|ref|XP_002561263.1|	-	Retrovirus-related Pol polyprotein from transposon TNT 1-94	KOG0017
g1242	contig_52	630564	631886	-	gi|255946529|ref|XP_002564032.1|	GO:0003677	Retrovirus-related Pol polyprotein from transposon TNT 1-94	KOG0017
g1243	contig_52	632169	632912	-	gi|584413777|emb|CDM32553.1|	-	-	-
g1244	contig_52	633364	633763	+	gi|238493883|ref|XP_002378178.1|	GO:0020037	Putative cytochrome b5 B11H24.095	KOG0537
g1245	contig_52	634414	638735	-	gi|255935855|ref|XP_002558954.1|	-	Anucleate primary sterigmata protein A
g1246	contig_52	641030	641821	+	gi|584415254|emb|CDM26946.1|	-	(S)-2-haloacid dehalogenase 1
g1247	contig_52	643352	644221	-	gi|46115808|ref|XP_383922.1|	GO:0003824	Putative enoyl-CoA hydratase/isomerase YngF	KOG1680
g1248	contig_52	644884	645627	+	gi|399167937|emb|CCE31307.1|	GO:0016887	Leptomycin B resistance protein pmd1	KOG0055
g1249	contig_52	645901	647196	-	gi|591461155|gb|EXL92723.1|	-	Putative lysine N-acyltransferase C17G9.06c
g1250	contig_52	649136	650259	+	gi|425772316|gb|EKV10726.1|	-	UPF0613 protein PB24D3.06c	KOG4840
g1251	contig_52	653045	655920	+	gi|255935845|ref|XP_002558949.1|	-	Protein ras-2	KOG0395
g1252	contig_52	656232	658850	+	gi|255935843|ref|XP_002558948.1|	GO:0003824	Uncharacterized protein PA3568	KOG1175
g1253	contig_52	659751	660311	-	gi|525582889|gb|EPS29139.1|	-	Clock-controlled protein 6
g1254	contig_52	662247	665661	+	gi|67539330|ref|XP_663439.1|	GO:0030170	Putative serine hydroxymethyltransferase, mitochondrial	KOG2467
g1255	contig_52	666335	668301	+	gi|584415267|emb|CDM26959.1|	-	Calcium-independent phospholipase A2-gamma	KOG4231
g1256	contig_52	669373	671808	+	gi|255935809|ref|XP_002558931.1|	-	Magnesium transporter NIPA2	KOG2922
g1257	contig_52	672338	673353	-	gi|255935807|ref|XP_002558930.1|	-	DNA repair protein REV1
g1258	contig_52	673752	675398	-	gi|255940528|ref|XP_002561033.1|	-	-	-
g1259	contig_52	676765	678532	-	gi|119480553|ref|XP_001260305.1|	GO:0022857	Myo-inositol transporter 1	KOG0254
g1260	contig_52	680006	688020	-	gi|255935801|ref|XP_002558927.1|	-	Cell pattern formation-associated protein stuA
g1261	contig_52	688634	693484	-	gi|584415273|emb|CDM26965.1|	GO:0008026	Uncharacterized helicase C15C4.05	KOG0920
g1262	contig_52	693620	703503	+	gi|425766342|gb|EKV04957.1|	GO:0003735	Translational activator GCN1	KOG1242
g1263	contig_52	705869	706915	-	gi|584415276|emb|CDM26968.1|	-	-	-
g1264	contig_52	708418	710407	+	gi|584415277|emb|CDM26969.1|	-	-	-
g1265	contig_52	717603	720875	+	gi|584415280|emb|CDM26972.1|	GO:0008270	-	-
g1266	contig_52	722110	723215	+	gi|255935779|ref|XP_002558916.1|	GO:0016491	Estradiol 17-beta-dehydrogenase 11	KOG1201
g1267	contig_52	723651	724167	+	gi|255946920|ref|XP_002564227.1|	-	-	-
g1268	contig_52	724664	727236	+	gi|378733229|gb|EHY59688.1|	-	Uncharacterized transporter C794.04c	KOG0255
g1269	contig_52	728126	746978	+	gi|584415282|emb|CDM26974.1|	-	-	-
g1270	contig_52	747510	749302	+	gi|315044539|ref|XP_003171645.1|	GO:0005524	Serine/threonine-protein kinase gad8	KOG0598
g1271	contig_52	750410	750837	+	gi|573992697|ref|XP_006674269.1|	GO:0015035	Glutaredoxin	KOG1752
g1272	contig_52	754426	761443	+	gi|255935767|ref|XP_002558910.1|	GO:0046873	Putative metal ion transporter C17A12.14
g1273	contig_52	762755	765512	-	gi|255935759|ref|XP_002558906.1|	-	-	-
g1274	contig_52	767397	768221	-	gi|255939512|ref|XP_002560525.1|	-	-	-
g1275	contig_52	769734	770696	-	gi|425773205|gb|EKV11573.1|	-	NmrA-like family domain-containing protein DDB_G0286605
g1276	contig_52	771154	772584	-	gi|425775201|gb|EKV13483.1|	GO:0016788	Non-hemolytic phospholipase C
g1277	contig_52	773647	774492	-	gi|568113579|gb|ETN36201.1|	GO:0016491	3-oxoacyl-[acyl-carrier-protein] reductase FabG	KOG0725
g1278	contig_52	774786	775673	+	gi|255935753|ref|XP_002558903.1|	-	-	-
g1279	contig_52	776138	776713	+	gi|255935751|ref|XP_002558902.1|	GO:0008080	-	-
g1280	contig_52	776954	779209	-	gi|425775198|gb|EKV13480.1|	GO:0008270	Uncharacterized transcriptional regulatory protein C139.03
g1281	contig_52	781848	783828	-	gi|584415294|emb|CDM26986.1|	GO:0022857	High-affinity glucose transporter	KOG0254
g1282	contig_52	785136	787333	-	gi|425766420|gb|EKV05032.1|	GO:0003735	60S ribosomal protein L44
g1283	contig_52	787923	788511	+	gi|121698194|ref|XP_001267744.1|	GO:0005515	Ubiquitin-like protein 1	KOG0005
g1284	contig_52	789944	791240	-	gi|425766418|gb|EKV05030.1|	-	-	-
g1285	contig_52	791829	792319	+	gi|425766417|gb|EKV05029.1|	GO:0051082	Tubulin-specific chaperone A
g1286	contig_52	792459	793524	-	gi|255935733|ref|XP_002558893.1|	-	THO complex subunit mft1
g1287	contig_52	793986	795152	+	gi|255935731|ref|XP_002558892.1|	-	-	-
g1288	contig_52	796906	797961	+	gi|255931243|ref|XP_002557178.1|	-	-	-
g1289	contig_52	798752	799709	-	gi|255930367|ref|XP_002556743.1|	GO:0016787	-	-
g1290	contig_52	802014	803661	+	gi|255935729|ref|XP_002558891.1|	-	Uncharacterized MFS-type transporter C16A3.17c	KOG0254
g1291	contig_52	805591	807919	+	gi|584415305|emb|CDM26997.1|	GO:0008270	Uncharacterized transcriptional regulatory protein YLR278C
g1292	contig_52	810354	812107	-	gi|317149410|ref|XP_001823364.2|	-	Choline transport protein	KOG1289
g1293	contig_52	812806	814185	+	gi|255931873|ref|XP_002557493.1|	-	-	-
g1294	contig_52	815408	816546	-	gi|159125874|gb|EDP50990.1|	-	-	-
g1295	contig_52	818853	820320	+	gi|591439500|gb|EXL72198.1|	GO:0050660	6-hydroxy-D-nicotine oxidase
g1296	contig_52	821529	822552	-	gi|238487670|ref|XP_002375073.1|	-	-	-
g1297	contig_52	824370	825279	-	gi|115387054|ref|XP_001210068.1|	GO:0016491	Uncharacterized oxidoreductase C162.03	KOG1205
g1298	contig_52	825853	826989	-	gi|115387052|ref|XP_001210067.1|	-	-	-
g1299	contig_52	828199	831562	-	gi|115387050|ref|XP_001210066.1|	GO:0048037	Probable polyketide synthase 39	KOG1178
g1300	contig_52	832344	841748	+	gi|115387048|ref|XP_001210065.1|	GO:0048037	Conidial yellow pigment biosynthesis polyketide synthase	KOG1202
g1301	contig_52	841965	843758	+	gi|115387044|ref|XP_001210063.1|	GO:0008171	Sterigmatocystin 8-O-methyltransferase
g1302	contig_52	845873	847433	+	gi|115387042|ref|XP_001210062.1|	-	Transcriptional activator Myb	KOG0048
g1303	contig_52	850739	852892	-	gi|115387040|ref|XP_001210061.1|	-	Uncharacterized transporter C3H1.06c	KOG0254
g1304	contig_52	854484	860762	-	gi|255941462|ref|XP_002561500.1|	-	-	-
g1305	contig_52	863069	863508	+	gi|584417060|emb|CDM28770.1|	-	-	-
g1306	contig_52	865512	867773	+	gi|425778235|gb|EKV16377.1|	-	Ankyrin repeat and KH domain-containing protein 1	KOG4177
g1307	contig_52	868372	869550	+	gi|596654348|ref|XP_007273822.1|	GO:0016491	Putative NADPH dehydrogenase C23G7.10c	KOG0134
g1308	contig_52	870459	876220	-	gi|584415306|emb|CDM26998.1|	GO:0016491	NADH oxidase
g1309	contig_52	877094	879113	-	gi|255935719|ref|XP_002558886.1|	GO:0051287	NADP-dependent malic enzyme	KOG1257
g1310	contig_52	880842	883138	+	gi|584415309|emb|CDM27002.1|	-	Uncharacterized protein C32A11.02c
g1311	contig_52	883764	885102	+	gi|425766409|gb|EKV05021.1|	GO:0051082	DnaJ-related protein spj1	KOG0712
g1312	contig_52	888608	896740	+	gi|584415311|emb|CDM27004.1|	GO:0048037	Lovastatin nonaketide synthase	KOG1202
g1313	contig_52	897122	898681	-	gi|255935709|ref|XP_002558881.1|	-	-	-
g1314	contig_52	898914	899668	+	gi|255935707|ref|XP_002558880.1|	GO:0003723	U3 small nucleolar ribonucleoprotein protein IMP3	KOG4655
g1315	contig_52	902871	904185	-	gi|317155350|ref|XP_001825036.2|	-	-	-
g1316	contig_52	904734	906281	-	gi|590012454|gb|EXJ87657.1|	GO:0016491	Cytochrome b2, mitochondrial	KOG0537
g1317	contig_52	906865	907878	+	gi|573058927|gb|ETS78725.1|	GO:0016787	Isoprenylcysteine alpha-carbonyl methylesterase ICME
g1318	contig_52	908690	910594	-	gi|169781150|ref|XP_001825038.1|	-	Allantoate permease	KOG2533
g1319	contig_52	911106	915092	+	gi|169781152|ref|XP_001825039.1|	GO:0016491	UPF0676 protein C1494.01	KOG0143
g1320	contig_52	915578	916671	-	gi|590015282|gb|EXJ90483.1|	-	-	-
g1321	contig_52	917281	919163	+	gi|615471339|ref|XP_007601140.1|	-	Uncharacterized transporter C460.05	KOG2533
g1322	contig_52	919996	921530	-	gi|512188128|gb|EPE03902.1|	GO:0016787	Peptidase M20 domain-containing protein 2
g1323	contig_52	922049	924139	-	gi|573054263|gb|ETS74222.1|	-	-	-
g1324	contig_52	925243	926421	-	gi|425766537|gb|EKV05146.1|	-	-	-
g1325	contig_52	927144	929152	-	gi|584415315|emb|CDM27008.1|	-	Uncharacterized transporter C417.10	KOG2533
g1326	contig_52	930124	931006	-	gi|255935701|ref|XP_002558877.1|	GO:0004590	Orotidine 5'-phosphate decarboxylase	KOG1377
g1327	contig_52	931319	931958	-	gi|255935699|ref|XP_002558876.1|	-	Microsomal glutathione S-transferase 3
g1328	contig_52	932462	934104	-	gi|584415318|emb|CDM27011.1|	-	Diacylglycerol O-acyltransferase 1	KOG0380
g1329	contig_52	934468	936442	+	gi|255935695|ref|XP_002558874.1|	-	Polyadenylation factor subunit 2	KOG0284
g1330	contig_52	937470	939699	+	gi|255935691|ref|XP_002558872.1|	-	Peroxisomal membrane protein PEX17
g1331	contig_52	939861	940860	-	gi|584415322|emb|CDM27015.1|	GO:0004671	Protein-S-isoprenylcysteine O-methyltransferase	KOG2628
g1332	contig_52	941147	941933	+	gi|255935687|ref|XP_002558870.1|	-	Putative acetyltransferase DDB_G0275913	KOG4750
g1333	contig_52	942524	950257	+	gi|584415324|emb|CDM27017.1|	GO:0004221	Ubiquitin carboxyl-terminal hydrolase 34	KOG1866
g1334	contig_52	950734	952626	-	gi|425766523|gb|EKV05132.1|	GO:0009982	tRNA pseudouridine synthase 1	KOG2553
g1335	contig_52	953203	954673	+	gi|425766522|gb|EKV05131.1|	-	Transcription initiation factor IIE subunit alpha	KOG2593
g1336	contig_52	957927	958766	+	-	-	-	-
g1337	contig_52	960456	961685	+	gi|587683298|gb|EWZ29903.1|	GO:0016491	Uncharacterized oxidoreductase C736.13	KOG1208
g1338	contig_52	962359	967305	+	gi|599154795|gb|EYE94028.1|	GO:0050661	Putative sterigmatocystin biosynthesis monooxygenase stcW	KOG1399
g1339	contig_52	968642	969568	+	gi|350631557|gb|EHA19928.1|	-	-	-
g1340	contig_52	969901	971099	-	gi|525582424|gb|EPS28674.1|	GO:0008171	Sterigmatocystin 8-O-methyltransferase	KOG3178
g1341	contig_52	973145	974583	+	gi|525582425|gb|EPS28675.1|	GO:0050660	3-hydroxybenzoate 6-hydroxylase 1	KOG2614
g1342	contig_52	975788	977131	-	gi|525582426|gb|EPS28676.1|	GO:0030170	Probable inactive 1-aminocyclopropane-1-carboxylate synthase-like protein 2	KOG0256
g1343	contig_52	978270	980052	+	gi|525582427|gb|EPS28677.1|	GO:0020037	Pisatin demethylase	KOG2614
g1344	contig_52	980267	982076	-	gi|169784774|ref|XP_001826848.1|	GO:0022857	Lactose permease	KOG0254
g1345	contig_52	983424	985041	+	gi|238507998|ref|XP_002385200.1|	GO:0004553	Xylosidase/arabinosidase
g1346	contig_52	986988	989342	-	gi|238497646|ref|XP_002380058.1|	GO:0008270	-	-
g1347	contig_52	990694	991350	-	gi|238497650|ref|XP_002380060.1|	GO:0003824	Phenylacrylic acid decarboxylase
g1348	contig_52	994054	995653	+	gi|358393007|gb|EHK42408.1|	GO:0016831	Ferulic acid decarboxylase 1
g1349	contig_52	998277	1002437	+	gi|317028107|ref|XP_001400592.2|	-	-	-
g1350	contig_52	1004919	1005992	-	gi|255935679|ref|XP_002558866.1|	-	-	-
g1351	contig_52	1006999	1009224	-	gi|425766518|gb|EKV05127.1|	-	Siderophore iron transporter 1	KOG0254
g1352	contig_52	1010322	1012871	-	gi|584415332|emb|CDM27026.1|	GO:0016491	Dimethylglycine dehydrogenase, mitochondrial	KOG2844
g1353	contig_52	1014572	1015009	+	gi|255935671|ref|XP_002558862.1|	-	-	-
g1354	contig_52	1015665	1016357	-	gi|121709802|ref|XP_001272528.1|	-	-	-
g1355	contig_52	1016984	1017859	+	gi|599151953|gb|EYE91364.1|	-	-	-
g1356	contig_52	1018088	1019027	-	gi|584415340|emb|CDM27034.1|	-	-
g1357	contig_52	1021850	1026178	-	gi|255935651|ref|XP_002558852.1|	GO:0005515	Bud site selection protein BUD4
g1358	contig_52	1026936	1028738	+	gi|255935649|ref|XP_002558851.1|	GO:0008026	ATP-dependent RNA helicase mrh4, mitochondrial	KOG0335
g1359	contig_52	1028990	1030683	-	gi|425766501|gb|EKV05110.1|	-	Cholinesterase	KOG4389
g1360	contig_52	1031273	1033351	-	gi|425766500|gb|EKV05109.1|	GO:0005515	Histone-lysine N-methyltransferase set9	KOG2589
g1361	contig_52	1034620	1035211	+	gi|255935643|ref|XP_002558848.1|	GO:0003735	54S ribosomal protein L38, mitochondrial	KOG0901
g1362	contig_52	1035684	1036172	-	gi|83775166|dbj|BAE65289.1|	GO:0003899	DNA-directed RNA polymerase II subunit RPB9	KOG2691
g1363	contig_52	1036699	1037394	+	gi|255935639|ref|XP_002558846.1|	GO:0016853	Peptidyl-prolyl cis-trans isomerase ssp-1	KOG3259
g1364	contig_52	1038399	1039121	+	gi|584415349|emb|CDM27043.1|	-	-	-
g1365	contig_52	1040910	1043734	-	gi|255935635|ref|XP_002558844.1|	-	Nucleoporin nup82
g1366	contig_52	1043978	1044741	+	gi|255935633|ref|XP_002558843.1|	GO:0003676	Nuclear cap-binding protein subunit 2	KOG0121
g1367	contig_52	1044880	1045738	-	gi|255935631|ref|XP_002558842.1|	-	Pyridoxal biosynthesis protein PDX2	KOG3210
g1368	contig_52	1046252	1047774	+	gi|584415353|emb|CDM27047.1|	GO:0008897	L-aminoadipate-semialdehyde dehydrogenase-phosphopantetheinyl transferase
g1369	contig_52	1049452	1050638	+	gi|255944491|ref|XP_002563013.1|	-	Probable L-asparaginase 1	KOG0503
g1370	contig_52	1051244	1052178	-	gi|255935627|ref|XP_002558840.1|	GO:0008415	Probable 1-acyl-sn-glycerol-3-phosphate acyltransferase	KOG2848
g1371	contig_52	1052726	1055319	-	gi|255935625|ref|XP_002558839.1|	GO:0005515	Protein bimA	KOG1126
g1372	contig_52	1056049	1056649	+	gi|255935623|ref|XP_002558838.1|	-	Meiotically up-regulated gene 69 protein
g1373	contig_52	1057166	1061195	-	gi|584415357|emb|CDM27051.1|	-	-	-
g1374	contig_52	1061965	1066577	+	gi|425766486|gb|EKV05095.1|	-	ERAD-associated E3 ubiquitin-protein ligase doa10	KOG1609
g1375	contig_52	1067321	1071364	+	gi|255935615|ref|XP_002558834.1|	-	-	-
g1376	contig_52	1073213	1077054	+	gi|83764906|dbj|BAE55050.1|	-	-	-
g1377	contig_52	1077771	1078789	+	gi|584409911|emb|CDM33935.1|	-	Sphingoid long-chain base transporter RSB1
g1378	contig_52	1079494	1081426	-	gi|255935609|ref|XP_002558831.1|	-	-	-
g1379	contig_52	1082405	1084424	+	gi|584415363|emb|CDM27057.1|	GO:0050660	Uncharacterized GMC-type oxidoreductase Mb1310_x0001_sp|P64263.1|Y1279_MYCTU RecName: Full=Uncharacterized GMC-type oxidoreductase Rv1279/MT1316	KOG1238
g1380	contig_52	1085020	1085540	+	gi|255935607|ref|XP_002558830.1|	-	-	-
g1381	contig_52	1086013	1086834	+	gi|584412769|emb|CDM31538.1|	-	-	-
g1382	contig_52	1087391	1089366	-	gi|115401406|ref|XP_001216291.1|	GO:0016884	Putative amidase C550.07	KOG1212
g1383	contig_52	1089991	1091213	+	gi|115401408|ref|XP_001216292.1|	-	-	-
g1384	contig_52	1091853	1092302	-	gi|584415365|emb|CDM27059.1|	-	-	-
g1385	contig_52	1093493	1100452	-	gi|255935603|ref|XP_002558828.1|	GO:0016874	Acetyl-CoA carboxylase	KOG0368
g1386	contig_52	1101870	1103681	-	gi|584415367|emb|CDM27061.1|	-	Nuclear distribution protein nudE homolog 1	KOG1853
g1387	contig_52	1105253	1106607	+	gi|255935599|ref|XP_002558826.1|	GO:0003824	Peroxyureidoacrylate/ureidoacrylate amidohydrolase RutB
g1388	contig_52	1107054	1107794	-	gi|584415369|emb|CDM27063.1|	-	Transport protein particle 20 kDa subunit	KOG3487
g1389	contig_52	1108391	1109734	+	gi|255935595|ref|XP_002558824.1|	-	Nuclear speckle splicing regulatory protein 1 homolog	KOG2117
g1390	contig_52	1112339	1113659	+	gi|83769553|dbj|BAE59688.1|	GO:0016491	L-pipecolate oxidase	KOG2820
g1391	contig_52	1114311	1116295	+	gi|259487831|tpe|CBF86816.1|	GO:0008270	-	-
g1392	contig_52	1117377	1119133	+	gi|238497001|ref|XP_002379736.1|	-	Uncharacterized MFS-type transporter PB1E7.08c	KOG0253
g1393	contig_52	1119485	1121582	-	gi|587735869|gb|EXA33585.1|	GO:0050661	Putative sterigmatocystin biosynthesis monooxygenase stcW	KOG1399
g1394	contig_52	1121961	1123387	+	gi|238496999|ref|XP_002379735.1|	GO:0051537	Putative dioxygenase subunit alpha YeaW_x0001_sp|P0ABR7.1|YEAW_ECOLI RecName: Full=Putative dioxygenase subunit alpha YeaW
g1395	contig_52	1128164	1129699	+	gi|121699912|ref|XP_001268221.1|	GO:0008270	-	-
g1396	contig_52	1132154	1139858	+	gi|425766547|gb|EKV05154.1|	-	-	-
g1397	contig_52	1140681	1141532	+	gi|425774403|gb|EKV12710.1|	GO:0005524	Probable serine/threonine-protein kinase DDB_G0284251	KOG0197
g1398	contig_52	1142191	1143812	-	gi|584415374|emb|CDM27068.1|	GO:0046873	Zinc-regulated transporter 3	KOG2474
g1399	contig_52	1144469	1145446	+	gi|584415375|emb|CDM27069.1|	GO:0046872	Mitochondrial nuclease	KOG3721
g1400	contig_52	1145613	1146921	-	gi|255935579|ref|XP_002558816.1|	-	Nitric oxide synthase-interacting protein homolog	KOG3039
g1401	contig_52	1147631	1151850	-	gi|255935577|ref|XP_002558815.1|	GO:0005086	Protein transport protein sec73	KOG0929
g1402	contig_52	1152577	1154211	+	gi|255935575|ref|XP_002558814.1|	GO:0008270	Putative metallocarboxypeptidase ecm14	KOG2650
g1403	contig_52	1154743	1156661	-	gi|584415379|emb|CDM27073.1|	-	Dicarboxylic amino acid permease	KOG1286
g1404	contig_52	1163414	1164538	+	gi|255935569|ref|XP_002558811.1|	-	-	-
g1405	contig_52	1165738	1167254	+	gi|584415382|emb|CDM27076.1|	GO:0046872	High-affinity nickel transport protein nic1
g1406	contig_52	1167750	1169705	+	gi|584415384|emb|CDM27078.1|	GO:0016779	DNA polymerase type-X family protein pol4	KOG2534
g1407	contig_52	1173625	1177803	-	gi|255935561|ref|XP_002558807.1|	GO:0046872	Probable phospholipid-transporting ATPase C887.12	KOG0206
g1408	contig_52	1178722	1179809	-	gi|425766655|gb|EKV05258.1|	GO:0003723	Exosome complex component rrp45	KOG1614
g1409	contig_52	1179952	1182145	+	gi|242776732|ref|XP_002478891.1|	-	Pre-mRNA-splicing factor cwc15	KOG3228
g1410	contig_52	1182717	1183364	+	gi|425766651|gb|EKV05254.1|	GO:0004146	Dihydrofolate reductase	KOG1324
g1411	contig_52	1183646	1186493	-	gi|584415390|emb|CDM27084.1|	GO:0005247	H(+)/Cl(-) exchange transporter 3	KOG0475
g1412	contig_52	1187970	1188969	+	gi|584415388|emb|CDM27082.1|	GO:0016788	GDSL esterase/lipase At5g62930	KOG3035
g1413	contig_52	1189615	1191224	+	gi|584415394|emb|CDM27088.1|	-	-	-
g1414	contig_52	1191605	1194492	-	gi|584415397|emb|CDM27091.1|	GO:0004789	Probable thiamine biosynthetic bifunctional enzyme	KOG2598
g1415	contig_52	1195347	1196594	+	gi|425766644|gb|EKV05247.1|	GO:0005488	Probable eukaryotic translation initiation factor 5	KOG2767
g1416	contig_52	1197623	1201121	-	gi|584415399|emb|CDM27093.1|	-	TEL2-interacting protein 1	KOG4524
g1417	contig_52	1201515	1204533	+	gi|584415400|emb|CDM27094.1|	GO:0005524	DNA ligase 1	KOG0967
g1418	contig_52	1205021	1207686	+	gi|584415401|emb|CDM27095.1|	GO:0008236	Dipeptidyl-peptidase 5	KOG2100
g1419	contig_52	1208060	1208523	-	-	-	-	-
g1420	contig_52	1209055	1209678	+	gi|584415402|emb|CDM27096.1|	-	-	-
g1421	contig_52	1210170	1211631	+	gi|584415402|emb|CDM27096.1|	-	-	-
g1422	contig_52	1212351	1212971	+	gi|425766641|gb|EKV05244.1|	-	-	-
g1423	contig_52	1213573	1216175	-	gi|584414671|emb|CDM26360.1|	-	Vacuolar transporter chaperone 4	KOG1161
g1424	contig_52	1217263	1220380	-	gi|425773036|gb|EKV11411.1|	GO:0005524	DNA replication licensing factor mcm4	KOG0478
g1425	contig_52	1221182	1224883	+	gi|584414669|emb|CDM26358.1|	-	Uncharacterized protein RSN1	KOG1134
g1426	contig_52	1225025	1226338	-	gi|255941176|ref|XP_002561357.1|	-	Arginine N-methyltransferase 2	KOG1709
g1427	contig_52	1226700	1227786	-	gi|255941178|ref|XP_002561358.1|	-	Prohibitin-2	KOG3090
g1428	contig_52	1227948	1228872	+	gi|425773032|gb|EKV11407.1|	GO:0003676	Cleavage stimulation factor subunit 2	KOG0108
g1429	contig_52	1230136	1236988	+	gi|255941182|ref|XP_002561360.1|	GO:0005524	DNA repair protein rad5	KOG0298
g1430	contig_52	1238693	1239641	-	gi|255941184|ref|XP_002561361.1|	GO:0051287	NADH-ubiquinone oxidoreductase 24 kDa subunit, mitochondrial	KOG3196
g1431	contig_52	1239963	1240307	-	gi|255941186|ref|XP_002561362.1|	-	UPF0135 protein BH1380
g1432	contig_52	1240818	1241879	-	gi|255941188|ref|XP_002561363.1|	GO:0019239	Adenine deaminase	KOG1097
g1433	contig_52	1242263	1243585	-	gi|425773027|gb|EKV11402.1|	-	tRNA threonylcarbamoyladenosine biosynthesis protein sua5	KOG3051
g1434	contig_52	1244129	1247539	-	gi|255941192|ref|XP_002561365.1|	-	Uncharacterized protein C132.01c	KOG2030
g1435	contig_52	1248225	1248884	-	gi|584411379|emb|CDM30142.1|	GO:0008168	Williams-Beuren syndrome chromosomal region 27 protein	KOG1541
g1436	contig_52	1252762	1254630	-	gi|597587501|ref|XP_007296807.1|	GO:0003735	60S ribosomal protein L10-A	KOG0857
g1437	contig_52	1255361	1257337	+	gi|584414654|emb|CDM26343.1|	-	-	-
g1438	contig_52	1257890	1258562	+	gi|525583131|gb|EPS29381.1|	-	Probable coatomer subunit zeta	KOG3343
g1439	contig_52	1259200	1259666	-	gi|255949044|ref|XP_002565289.1|	GO:0016846	-	-
g1440	contig_52	1261398	1263536	+	gi|584414651|emb|CDM26340.1|	GO:0008270	Arginine metabolism regulation protein II
g1441	contig_52	1264685	1265861	+	gi|573068436|gb|ETS87964.1|	GO:0008199	-	-
g1442	contig_52	1266658	1267476	+	gi|584414650|emb|CDM26339.1|	GO:0016491	3-oxoacyl-[acyl-carrier-protein] reductase FabG	KOG1200
g1443	contig_52	1267995	1268945	+	gi|255941208|ref|XP_002561373.1|	-	Probable deferrochelatase/peroxidase YfeX
g1444	contig_52	1269413	1271140	-	gi|584414648|emb|CDM26337.1|	GO:0050661	Phenylacetone monooxygenase	KOG1399
g1445	contig_52	1272546	1274584	-	gi|452838036|gb|EME39977.1|	GO:0008270	Uncharacterized transcriptional regulatory protein C1327.01c
g1446	contig_52	1275905	1277845	+	gi|400600806|gb|EJP68474.1|	GO:0022857	High-affinity glucose transporter	KOG0254
g1447	contig_52	1278504	1279973	+	gi|425773021|gb|EKV11396.1|	GO:0008484	N-sulphoglucosamine sulphohydrolase	KOG3867
g1448	contig_52	1280513	1282270	-	gi|255941248|ref|XP_002561393.1|	-	-	-
g1449	contig_52	1283336	1285800	-	gi|584414644|emb|CDM26333.1|	GO:0005524	Probable ATP-dependent RNA helicase prh1	KOG0922
g1450	contig_52	1287278	1289256	+	gi|584414642|emb|CDM26331.1|	-	Phototropin-2	KOG0498
g1451	contig_52	1289746	1291398	-	gi|255941264|ref|XP_002561401.1|	-	F-box protein pof7	KOG2997
g1452	contig_52	1291816	1293097	+	gi|255941280|ref|XP_002561409.1|	-	Mitochondrial carrier protein MTM1	KOG0761
g1453	contig_52	1293402	1297385	+	gi|584414638|emb|CDM26327.1|	GO:0046873	Protein SERAC1
g1454	contig_52	1298051	1298506	+	gi|584416583|emb|CDM28288.1|	-	UPF0136 membrane protein YJR085C	KOG4267
g1455	contig_52	1299603	1300157	-	gi|584416753|emb|CDM28460.1|	GO:0008080	-	-
g1456	contig_52	1300755	1303887	-	gi|584414637|emb|CDM26326.1|	GO:0005524	Hybrid signal transduction histidine kinase J	KOG0519
g1457	contig_52	1304836	1306751	-	gi|525583116|gb|EPS29366.1|	GO:0005524	Heat shock protein 60	KOG0356
g1458	contig_52	1308167	1310048	-	gi|425773113|gb|EKV11485.1|	-	-	-
g1459	contig_52	1311879	1312214	+	gi|525583114|gb|EPS29364.1|	GO:0046961	-	-
g1460	contig_52	1312639	1315238	+	gi|255941294|ref|XP_002561416.1|	-	N-alpha-acetyltransferase 35, NatC auxiliary subunit	KOG2343
g1461	contig_52	1316012	1318368	+	gi|425773109|gb|EKV11481.1|	GO:0008270	-	-
g1462	contig_52	1321137	1321703	-	-	-	-	-
g1463	contig_52	1323138	1325552	+	gi|255941300|ref|XP_002561419.1|	-	-	-
g1464	contig_52	1326103	1327016	-	gi|584414627|emb|CDM26315.1|	GO:0008080	Uncharacterized N-acetyltransferase C550.08
g1465	contig_52	1328059	1329801	+	gi|255941306|ref|XP_002561422.1|	GO:0003676	-	-
g1466	contig_52	1330149	1330709	+	gi|255941308|ref|XP_002561423.1|	GO:0003824	Uncharacterized isochorismatase family protein YecD_x0001_sp|P0ADI7.2|YECD_ECOLI RecName: Full=Isochorismatase family protein YecD
g1467	contig_52	1331968	1334075	-	gi|584414621|emb|CDM26309.1|	GO:0048038	Copper amine oxidase 1	KOG1186
g1468	contig_52	1338753	1339456	+	gi|584414620|emb|CDM26308.1|	-	-	-
g1469	contig_52	1339951	1341732	+	gi|584414619|emb|CDM26307.1|	-	Allergen Asp f 4
g1470	contig_52	1341964	1342817	-	gi|584414618|emb|CDM26306.1|	-	-	-
g1471	contig_52	1343415	1344399	-	gi|255941340|ref|XP_002561439.1|	GO:0046872	Meiotically up-regulated gene 14 protein	KOG3699
g1472	contig_52	1344767	1346905	-	gi|584414616|emb|CDM26304.1|	GO:0008233	Putative hydrolase Mb2248c
g1473	contig_52	1348125	1348703	+	gi|584414615|emb|CDM26303.1|	-	-	-
g1474	contig_52	1349025	1350152	-	gi|425773100|gb|EKV11472.1|	-	-	-
g1475	contig_52	1350849	1351676	-	gi|584414613|emb|CDM26301.1|	-	Lipase
g1476	contig_52	1352252	1354676	-	gi|255941352|ref|XP_002561445.1|	-	Uncharacterized protein AN5342
g1477	contig_52	1356576	1358276	+	gi|584414606|emb|CDM26294.1|	-	Uncharacterized transporter C1002.16c	KOG2533
g1478	contig_52	1358904	1359366	+	gi|525583100|gb|EPS29350.1|	GO:0004857	ATPase inhibitor, mitochondrial
g1479	contig_52	1359584	1361181	-	gi|584414608|emb|CDM26296.1|	-	Riboflavin transporter MCH5	KOG2504
g1480	contig_52	1362190	1364048	+	gi|584414609|emb|CDM26297.1|	-	-	-
g1481	contig_52	1364498	1368899	-	gi|255941362|ref|XP_002561450.1|	GO:0042626	ABC transporter ATP-binding protein/permease PDR18	KOG0065
g1482	contig_52	1370018	1378049	-	gi|584414602|emb|CDM26290.1|	-	Lovastatin nonaketide synthase	KOG1202
g1483	contig_52	1378473	1379228	-	gi|584414601|emb|CDM26289.1|	-	Family of serine hydrolases 3
g1484	contig_52	1379737	1380335	+	gi|525583103|gb|EPS29353.1|	-	Translocator protein homolog	KOG3797
g1485	contig_52	1381478	1384009	+	gi|584414599|emb|CDM26287.1|	-	Pheromone-regulated membrane protein 10_x0001_sp|C4YTQ0.1|PRM10_CANAW RecName: Full=Pheromone-regulated membrane protein 10
g1486	contig_52	1384452	1385603	+	gi|255941370|ref|XP_002561454.1|	-	-	-
g1487	contig_52	1386087	1386989	-	gi|584416846|emb|CDM28554.1|	-	NmrA-like family domain-containing protein DDB_G0286605
g1488	contig_52	1388562	1389164	-	gi|303320839|ref|XP_003070414.1|	-	-	-
g1489	contig_52	1393090	1393719	+	gi|317145812|ref|XP_001821081.2|	GO:0005515	Glutathione S-transferase GST-6.0
g1490	contig_52	1395921	1398051	-	gi|255954659|ref|XP_002568082.1|	-	N amino acid transport system protein
g1491	contig_52	1398507	1399662	-	gi|255939826|ref|XP_002560682.1|	GO:0016491	Probable formaldehyde dehydrogenase AdhA	KOG0023
g1492	contig_52	1404994	1406511	+	gi|238490130|ref|XP_002376302.1|	GO:0046556	Probable alpha-N-arabinofuranosidase B
g1493	contig_52	1407894	1408952	-	gi|255935827|ref|XP_002558940.1|	GO:0016491	Methylsterol monooxygenase 2-2	KOG0873
g1494	contig_52	1409530	1411363	-	gi|255941392|ref|XP_002561465.1|	-	-	-
g1495	contig_52	1413872	1415706	+	gi|584414589|emb|CDM26277.1|	-	Amino-acid permease 2	KOG1289
g1496	contig_52	1416004	1418193	-	gi|317027367|ref|XP_001399192.2|	GO:0008270	-	-
g1497	contig_52	1418722	1419708	+	gi|584414588|emb|CDM26276.1|	GO:0016491	UPF0676 protein C1494.01	KOG0143
g1498	contig_52	1419891	1422155	-	gi|584414587|emb|CDM26275.1|	GO:0008270	-	-
g1499	contig_52	1422882	1424073	-	gi|255941418|ref|XP_002561478.1|	GO:0051537	Putative dioxygenase subunit alpha YeaW_x0001_sp|P0ABR7.1|YEAW_ECOLI RecName: Full=Putative dioxygenase subunit alpha YeaW
g1500	contig_52	1426902	1428419	+	gi|238500626|ref|XP_002381547.1|	GO:0008270	Uncharacterized transcriptional regulatory protein C530.11c
g1501	contig_52	1429350	1430749	-	gi|255941422|ref|XP_002561480.1|	GO:0016491	L-pipecolate oxidase	KOG2820
g1502	contig_52	1431422	1432985	-	gi|255953205|ref|XP_002567355.1|	GO:0047547	Uncharacterized protein YxeQ
g1503	contig_52	1433701	1434787	+	gi|255953203|ref|XP_002567354.1|	-	Inositol phoshorylceramide synthase regulatory subunit kei1
g1504	contig_52	1436311	1441020	+	gi|255953199|ref|XP_002567352.1|	GO:0051536	Sulfite reductase [NADPH] subunit beta	KOG0560
g1505	contig_52	1441614	1442732	+	gi|425767199|gb|EKV05774.1|	GO:0016787	Acetyl-hydrolase
g1506	contig_52	1444091	1445192	+	gi|425767196|gb|EKV05771.1|	GO:0003899	DNA-directed RNA polymerase III subunit rpc5	KOG2354
g1507	contig_52	1445772	1449915	+	gi|255953185|ref|XP_002567345.1|	GO:0003899	DNA-directed RNA polymerase, mitochondrial	KOG1038
g1508	contig_52	1451289	1454184	+	gi|255953181|ref|XP_002567343.1|	GO:0008270	Xylanolytic transcriptional activator xlnR
g1509	contig_52	1454589	1459115	+	gi|557729733|dbj|GAD91765.1|	GO:0051536	Uncharacterized protein MJ0674
g1510	contig_52	1460611	1460856	+	gi|584412319|emb|CDM31085.1|	-	-	-
g1511	contig_52	1462016	1463493	-	gi|255953175|ref|XP_002567340.1|	-	Vacuolar calcium ion transporter	KOG1397
g1512	contig_52	1463767	1465114	+	gi|255953173|ref|XP_002567339.1|	-	Vacuolar calcium ion transporter	KOG1397
g1513	contig_52	1465246	1466533	-	gi|584412322|emb|CDM31088.1|	-	Vacuolar calcium ion transporter	KOG1397
g1514	contig_52	1467065	1468447	+	gi|255953169|ref|XP_002567337.1|	GO:0042802	Nephrocystin-3	KOG1840
g1515	contig_52	1469352	1472677	+	gi|255953167|ref|XP_002567336.1|	GO:0046872	Calcium-transporting ATPase 2	KOG0204
g1516	contig_52	1476303	1478214	+	gi|425767187|gb|EKV05762.1|	GO:0005315	Phosphate-repressible phosphate permease	KOG2493
g1517	contig_52	1479294	1480523	-	gi|255953159|ref|XP_002567332.1|	-	-	-
g1518	contig_52	1481538	1482707	-	gi|584412330|emb|CDM31096.1|	-	-	-
g1519	contig_52	1483795	1488249	+	gi|425767445|gb|EKV06018.1|	GO:0016491	Meiotically up-regulated gene 158 protein
g1520	contig_52	1490887	1491411	+	gi|255953141|ref|XP_002567323.1|	-	-	-
g1521	contig_52	1491469	1492663	-	gi|255953139|ref|XP_002567322.1|	-	-	-
g1522	contig_52	1493014	1493500	-	gi|145251215|ref|XP_001397121.1|	GO:0003702	Transcription initiation factor IIA subunit 2	KOG3463
g1523	contig_52	1495272	1497207	-	gi|584412341|emb|CDM31107.1|	GO:0016773	Hexokinase-1	KOG1369
g1524	contig_52	1498892	1499891	+	gi|584412342|emb|CDM31108.1|	-	-	-
g1525	contig_52	1500381	1501357	+	gi|255953127|ref|XP_002567316.1|	-	-	-
g1526	contig_52	1501800	1503721	+	gi|255953125|ref|XP_002567315.1|	-	Uncharacterized transporter C1683.12	KOG2533
g1527	contig_52	1504680	1505226	-	gi|255953119|ref|XP_002567312.1|	-	Cyanovirin-N
g1528	contig_52	1507005	1508066	-	gi|255953115|ref|XP_002567310.1|	GO:0016491	D-arabinitol 2-dehydrogenase [ribulose-forming]	KOG0725
g1529	contig_52	1509946	1512321	-	gi|584412347|emb|CDM31114.1|	-	Gamma-tubulin complex component 3 homolog	KOG2065
g1530	contig_52	1513141	1516423	+	gi|255953111|ref|XP_002567308.1|	GO:0008641	Ubiquitin-activating enzyme E1 1	KOG2012
g1531	contig_52	1516852	1518108	+	gi|425767455|gb|EKV06027.1|	-	Glutathione S-transferase omega-like 2	KOG2903
g1532	contig_52	1518797	1520954	-	gi|425767453|gb|EKV06025.1|	-	Calcium-binding mitochondrial carrier SAL1	KOG0036
g1533	contig_52	1521344	1522392	+	gi|584412351|emb|CDM31118.1|	-	RNA polymerase II holoenzyme cyclin-like subunit	KOG0794
g1534	contig_52	1526256	1526829	+	gi|255953099|ref|XP_002567302.1|	-	Uncharacterized protein C22H10.02
g1535	contig_52	1530466	1531539	-	gi|255950630|ref|XP_002566082.1|	-	-	-
g1536	contig_52	1535308	1537093	-	gi|557729461|dbj|GAD91976.1|	-	Peroxidase 2
g1537	contig_52	1538750	1540939	+	gi|584406405|emb|CDM38047.1|	GO:0005515	Galactose oxidase
g1538	contig_52	1542231	1542971	-	gi|212531427|ref|XP_002145870.1|	-	-	-
g1539	contig_52	1545126	1546085	+	gi|115396050|ref|XP_001213664.1|	-	Soluble epoxide hydrolase	KOG4178
g1540	contig_52	1548028	1549371	+	gi|584412354|emb|CDM31121.1|	GO:0004190	Putative aspergillopepsin A-like aspartic endopeptidase AFUA_2G15950	KOG1339
g1541	contig_52	1549654	1551006	-	gi|255953095|ref|XP_002567300.1|	GO:0000049	GU4 nucleic-binding protein 1	KOG2241
g1542	contig_52	1552005	1554281	+	gi|255953089|ref|XP_002567297.1|	GO:0046983	-	-
g1543	contig_52	1554785	1556225	+	gi|255953087|ref|XP_002567296.1|	GO:0016491	Diacetyl reductase [(R)-acetoin forming]	KOG0024
g1544	contig_52	1557695	1560789	+	gi|425767483|gb|EKV06054.1|	GO:0016491	Mannan polymerase II complex ANP1 subunit
g1545	contig_52	1561340	1562783	+	gi|584412366|emb|CDM31133.1|	-	-	-
g1546	contig_52	1562966	1564120	-	gi|425767481|gb|EKV06052.1|	-	Uncharacterized protein YGR111W
g1547	contig_52	1566995	1567828	-	gi|255953077|ref|XP_002567291.1|	-	Mitotic spindle assembly checkpoint protein MAD2B	KOG3186
g1548	contig_52	1570538	1573795	+	gi|255953075|ref|XP_002567290.1|	GO:0008565	Importin subunit beta-5	KOG2274
g1549	contig_52	1576246	1577424	+	gi|525586503|gb|EPS32753.1|	-	Demethylmenaquinone methyltransferase
g1550	contig_52	1577852	1579491	-	gi|255953069|ref|XP_002567287.1|	GO:0008270	-	-
g1551	contig_52	1580042	1581571	+	gi|350630290|gb|EHA18663.1|	GO:0004553	Alpha-galactosidase A	KOG2366
g1552	contig_52	1581707	1582663	-	gi|255953067|ref|XP_002567286.1|	-	-	-
g1553	contig_52	1584497	1586056	-	gi|169772005|ref|XP_001820472.1|	-	Uncharacterized MFS-type transporter C530.15c	KOG0255
g1554	contig_52	1588280	1590705	+	gi|255953065|ref|XP_002567285.1|	-	-	-
g1555	contig_52	1592968	1594008	-	gi|134080863|emb|CAK41421.1|	GO:0008199	-	-
g1556	contig_52	1595441	1597376	+	gi|584412376|emb|CDM31143.1|	GO:0008270	Uncharacterized transcriptional regulatory protein C11D3.07c
g1557	contig_52	1598780	1600193	-	gi|255953057|ref|XP_002567281.1|	-	TNF receptor-associated factor 5	KOG0297
g1558	contig_52	1600683	1601498	+	gi|425767468|gb|EKV06039.1|	GO:0005515	Probable syntaxin-8B
g1559	contig_52	1601899	1602349	-	gi|255953053|ref|XP_002567279.1|	-	-	-
g1560	contig_52	1604769	1606793	+	gi|255940508|ref|XP_002561023.1|	-	General amino acid permease AGP2	KOG1286
g1561	contig_52	1609134	1609913	-	gi|119497775|ref|XP_001265645.1|	GO:0016491	Uncharacterized oxidoreductase AN7799	KOG1208
g1562	contig_52	1611956	1616150	-	gi|259483583|tpe|CBF79092.1|	GO:0008270	-	-
g1563	contig_52	1622441	1626749	+	gi|119499519|ref|XP_001266517.1|	-	Inulinase	KOG0228
g1564	contig_52	1628797	1631221	+	gi|345548069|gb|AEO12134.1|	-	Levanase	KOG0228
g1565	contig_52	1632658	1634263	-	gi|242810957|ref|XP_002485689.1|	GO:0022857	Probable glucose transporter rco-3	KOG0254
g1566	contig_52	1637941	1639807	+	gi|242800452|ref|XP_002483591.1|	GO:0008171	-	-
g1567	contig_52	1641376	1642074	+	gi|255938201|ref|XP_002559871.1|	GO:0003824	Pyrophosphatase PpaX
g1568	contig_52	1642903	1644433	+	gi|255948058|ref|XP_002564796.1|	-	-	-
g1569	contig_52	1645350	1651637	+	gi|584414109|emb|CDM32885.1|	GO:0016787	Probable beta-glucosidase L
g1570	contig_52	1652215	1653767	+	gi|317141498|ref|XP_001818655.2|	-	-	-
g1571	contig_52	1654611	1656061	+	gi|584412382|emb|CDM31149.1|	-	Uncharacterized protein Mb0912_x0001_sp|P64743.1|Y888_MYCTU RecName: Full=Uncharacterized protein Rv0888/MT0911
g1572	contig_52	1656251	1657331	-	gi|425767466|gb|EKV06037.1|	-	Cytosolic Fe-S cluster assembly factor nbp35	KOG3022
g1573	contig_52	1658762	1661965	+	gi|255953041|ref|XP_002567273.1|	-	Phosphatidylethanolamine N-methyltransferase
g1574	contig_52	1663673	1664679	+	gi|425767491|gb|EKV06061.1|	-	Exosome complex component mtr3	KOG1068
g1575	contig_52	1668323	1670464	+	gi|255953037|ref|XP_002567271.1|	-	-	-
g1576	contig_52	1672567	1674532	-	gi|255953035|ref|XP_002567270.1|	GO:0005524	Putative proline--tRNA ligase C19C7.06	KOG4163
g1577	contig_52	1674757	1676744	+	gi|525586525|gb|EPS32775.1|	GO:0005524	T-complex protein 1 subunit alpha	KOG0360
g1578	contig_52	1676914	1678028	-	gi|584412391|emb|CDM31158.1|	-	-	-
g1579	contig_52	1678534	1680773	-	gi|584412392|emb|CDM31159.1|	-	Cell division cycle protein cdt2	KOG0321
g1580	contig_52	1682260	1682509	+	-	-	-	-
g1581	contig_52	1683535	1689045	+	gi|584412394|emb|CDM31161.1|	GO:0003723	rRNA biogenesis protein rrp5	KOG1070
g1582	contig_52	1689411	1690874	+	gi|584412395|emb|CDM31162.1|	-	Altered inheritance of mitochondria protein 6
g1583	contig_52	1691463	1692710	-	gi|584412396|emb|CDM31163.1|	GO:0016151	Uncharacterized urease accessory protein ureD-like
g1584	contig_52	1693976	1697585	+	gi|255953021|ref|XP_002567263.1|	-	Cohesin subunit psc3	KOG2011
g1585	contig_52	1698735	1700661	-	gi|425767644|gb|EKV06212.1|	GO:0008565	Importin subunit alpha-1	KOG0166
g1586	contig_52	1701031	1702974	+	gi|425767643|gb|EKV06211.1|	GO:0003677	Protection of telomeres protein 1	KOG4757
g1587	contig_52	1703302	1704864	-	gi|255953015|ref|XP_002567260.1|	-	-	-
g1588	contig_52	1705218	1706144	+	gi|255953013|ref|XP_002567259.1|	-	Increased recombination centers protein 22
g1589	contig_52	1706418	1707304	-	gi|255953011|ref|XP_002567258.1|	-	Aprataxin-like protein	KOG0562
g1590	contig_52	1707517	1711697	+	gi|255953009|ref|XP_002567257.1|	GO:0008026	Putative ATP-dependent RNA helicase ucp12	KOG0920
g1591	contig_52	1712702	1714689	-	gi|584412405|emb|CDM31172.1|	-	G2/mitotic-specific cyclin-4	KOG0653
g1592	contig_52	1717403	1719374	+	gi|425767637|gb|EKV06205.1|	-	Uncharacterized transcriptional regulatory protein C56F2.05c
g1593	contig_52	1720210	1721982	+	gi|584412407|emb|CDM31174.1|	GO:0003899	DNA-directed RNA polymerase III subunit rpc4
g1594	contig_52	1722886	1724613	+	gi|255952995|ref|XP_002567250.1|	-	-	-
g1595	contig_52	1726133	1727437	-	gi|584412411|emb|CDM31178.1|	-	UPF0695 membrane protein C977.11/PB8B6.06c
g1596	contig_52	1727552	1728538	+	gi|584412412|emb|CDM31179.1|	-	Putative uracil phosphoribosyltransferase urg2	KOG4203
g1597	contig_52	1729350	1731786	-	gi|255952987|ref|XP_002567246.1|	GO:0008270	Zinc finger protein YGR067C
g1598	contig_52	1737970	1741807	+	gi|255952983|ref|XP_002567244.1|	GO:0005515	Cell division control protein 25	KOG3417
g1599	contig_52	1743383	1744439	-	gi|255952981|ref|XP_002567243.1|	GO:0005515	COP9 signalosome complex subunit 5	KOG1554
g1600	contig_52	1744942	1747431	+	gi|255952979|ref|XP_002567242.1|	-	Anaphase spindle elongation protein 1	KOG4302
g1601	contig_52	1748529	1750659	-	gi|255952977|ref|XP_002567241.1|	GO:0016876	Glutamate--tRNA ligase, mitochondrial	KOG1149
g1602	contig_52	1750966	1752366	+	gi|255952975|ref|XP_002567240.1|	GO:0051082	DnaJ protein homolog xdj1	KOG0712
g1603	contig_52	1752873	1754938	+	gi|238502641|ref|XP_002382554.1|	GO:0003824	L-arabonate dehydratase	KOG2448
g1604	contig_52	1755239	1757149	-	gi|255952971|ref|XP_002567238.1|	-	-	-
g1605	contig_52	1758050	1758844	-	gi|358372204|dbj|GAA88809.1|	-	Dihydrolipoyllysine-residue acetyltransferase component of acetoin cleaving system
g1606	contig_52	1759055	1761541	-	gi|358397369|gb|EHK46744.1|	GO:0022857	Putative polyol transporter 1	KOG0254
g1607	contig_52	1762249	1763574	+	gi|587700645|gb|EWZ47250.1|	-	Transaldolase	KOG2772
g1608	contig_52	1763607	1764726	-	gi|358382844|gb|EHK20514.1|	GO:0030528	-	-
g1609	contig_52	1765454	1765891	-	gi|255936199|ref|XP_002559126.1|	-	-	-
g1610	contig_52	1767680	1769864	-	gi|584417406|emb|CDM29116.1|	-	-	-
g1611	contig_52	1770514	1771087	+	gi|471567637|gb|EMR67542.1|	-	-	-
g1612	contig_52	1771375	1772447	+	gi|391872303|gb|EIT81437.1|	-	Uncharacterized oxidoreductase C2F3.05c	KOG1577
g1613	contig_52	1773129	1773896	-	gi|563294880|gb|ESZ95159.1|	-	-	-
g1614	contig_52	1774588	1774962	-	-	-	-	-
g1615	contig_52	1775626	1776120	+	gi|255952961|ref|XP_002567233.1|	-	-	-
g1616	contig_52	1776661	1777276	-	gi|255952957|ref|XP_002567231.1|	-	-	-
g1617	contig_52	1777775	1779394	+	gi|255952943|ref|XP_002567224.1|	GO:0009982	Uncharacterized protein C18B11.02c	KOG1919
g1618	contig_52	1779899	1781014	+	gi|119499235|ref|XP_001266375.1|	GO:0005515	Ankyrin repeat domain-containing protein 50	KOG4177
g1619	contig_52	1781190	1782644	-	gi|584412432|emb|CDM31200.1|	GO:0016757	-	-
g1620	contig_52	1783430	1785879	-	gi|425777996|gb|EKV16143.1|	GO:0016491	60S ribosomal protein L32	KOG2742
g1621	contig_52	1786334	1787347	-	gi|255952935|ref|XP_002567220.1|	-	-	-
g1622	contig_52	1788686	1790498	-	gi|425780634|gb|EKV18640.1|	GO:0003676	Probable RNA-binding protein sce3	KOG0118
g1623	contig_52	1791698	1792476	+	gi|255952931|ref|XP_002567218.1|	-	-	-
g1624	contig_52	1793204	1802034	+	gi|255952929|ref|XP_002567217.1|	-	UPF0648 protein C3H5.09c	KOG1910
g1625	contig_52	1802499	1803809	-	gi|525587915|gb|EPS34165.1|	GO:0030528	Phosphorus acquisition-controlling protein
g1626	contig_52	1805663	1806922	+	gi|169769951|ref|XP_001819445.1|	-	Protein MAM3	KOG2118
g1627	contig_52	1807576	1809036	-	gi|255952927|ref|XP_002567216.1|	-	-	-
g1628	contig_52	1809962	1815702	+	gi|584412442|emb|CDM31210.1|	-	Transcription factor tau subunit sfc3
g1629	contig_52	1815921	1816859	-	gi|255952923|ref|XP_002567214.1|	GO:0016881	Ubiquitin-conjugating enzyme E2 J1	KOG0428
g1630	contig_52	1817105	1818769	-	gi|425778004|gb|EKV16151.1|	GO:0008270	Palmitoyltransferase pfa3	KOG1315
g1631	contig_52	1819145	1820745	-	gi|584412445|emb|CDM31213.1|	GO:0004252	Uncharacterized rhomboid protein AN10929	KOG2290
g1632	contig_52	1821650	1822075	-	gi|358374889|dbj|GAA91477.1|	-	-	-
g1633	contig_52	1822915	1824914	+	gi|425778006|gb|EKV16153.1|	-	-	-
g1634	contig_52	1829555	1833375	+	gi|255952907|ref|XP_002567206.1|	GO:0003824	Phospholipase D1	KOG1329
g1635	contig_52	1835880	1837052	-	gi|255943927|ref|XP_002562731.1|	-	-	-
g1636	contig_52	1838697	1841468	-	gi|599151931|gb|EYE91342.1|	-	Uncharacterized MFS-type transporter C18.02	KOG3764
g1637	contig_52	1842265	1842933	-	gi|500254828|gb|EON98406.1|	GO:0008168	-	-
g1638	contig_52	1844577	1845982	+	gi|589991975|gb|EXJ74584.1|	GO:0004609	Phosphatidylserine decarboxylase proenzyme 3	KOG2419
g1639	contig_52	1846829	1848755	+	gi|317150904|ref|XP_001823898.2|	GO:0030170	Probable cystathionine gamma-synthase	KOG0053
g1640	contig_52	1850844	1853467	+	gi|255952903|ref|XP_002567204.1|	GO:0004497	Zeaxanthin epoxidase, chloroplastic	KOG2614
g1641	contig_52	1853807	1856362	-	gi|238492609|ref|XP_002377541.1|	GO:0046983	Alkylglycerol monooxygenase
g1642	contig_52	1857478	1858085	+	gi|255956261|ref|XP_002568883.1|	GO:0008824	Cyanate hydratase
g1643	contig_52	1858781	1860493	+	gi|584412454|emb|CDM31222.1|	-	-	-
g1644	contig_52	1861247	1861627	-	gi|255956265|ref|XP_002568885.1|	-	-	-
g1645	contig_52	1862419	1863054	+	gi|425778015|gb|EKV16162.1|	-	-	-
g1646	contig_52	1864227	1865643	-	-	-	-	-
g1647	contig_52	1867409	1868414	-	gi|255956271|ref|XP_002568888.1|	-	-	-
g1648	contig_52	1868744	1872163	-	gi|425777959|gb|EKV16108.1|	GO:0003887	DNA polymerase delta catalytic subunit	KOG0969
g1649	contig_52	1873026	1875362	+	gi|584412460|emb|CDM31228.1|	GO:0005524	Eukaryotic translation initiation factor 2-alpha kinase 1	KOG1035
g1650	contig_52	1876396	1878443	+	gi|255957191|ref|XP_002569348.1|	-	-	-
g1651	contig_52	1880767	1881278	+	gi|255939752|ref|XP_002560645.1|	-	-	-
g1652	contig_52	1890179	1890865	+	gi|145254452|ref|XP_001398629.1|	GO:0022857	Probable quinate permease	KOG0254
g1653	contig_52	1891791	1898141	+	gi|70986860|ref|XP_748917.1|	GO:0005524	Saccharolysin	KOG2089
g1654	contig_52	1898369	1899076	-	gi|317027852|ref|XP_001400131.2|	-	-	-
g1655	contig_52	1901317	1902921	+	gi|255946718|ref|XP_002564126.1|	-	Uncharacterized protein YDR124W
g1656	contig_52	1907511	1908842	-	gi|530460646|gb|EQB43937.1|	GO:0004222	Saccharolysin	KOG2089
g1657	contig_52	1910118	1911875	+	gi|169773601|ref|XP_001821269.1|	GO:0004379	Glycylpeptide N-tetradecanoyltransferase	KOG2779
g1658	contig_52	1912247	1915155	-	gi|557722234|dbj|GAD98966.1|	GO:0016491	Laccase-5	KOG1263
g1659	contig_52	1915795	1918293	+	gi|358376136|dbj|GAA92704.1|	GO:0016788	Acid phosphatase
g1660	contig_52	1919884	1921602	-	gi|584407628|emb|CDM36453.1|	-	Putative hydrolase Mb2247c
g1661	contig_52	1922184	1923229	+	gi|212541168|ref|XP_002150739.1|	-	Putative ABC transporter anion-binding protein HVO_1888
g1662	contig_52	1926627	1926966	+	gi|115443454|ref|XP_001218534.1|	-	-	-
g1663	contig_52	1927546	1929008	-	gi|525580385|gb|EPS26635.1|	GO:0004553	Endochitinase 1	KOG2806
g1664	contig_52	1932988	1934948	-	gi|525582324|gb|EPS28574.1|	-	Uncharacterized amino-acid permease C15C4.04c	KOG1289
g1665	contig_52	1935641	1937047	+	gi|525582323|gb|EPS28573.1|	-	-	-
g1666	contig_52	1938576	1939316	+	gi|255942681|ref|XP_002562109.1|	-	-	-
g1667	contig_52	1942733	1944080	+	gi|525580385|gb|EPS26635.1|	GO:0004553	Endochitinase 1	KOG2806
g1668	contig_52	1945822	1947210	+	gi|584412899|emb|CDM31669.1|	-	-	-
g1669	contig_52	1950375	1956642	-	gi|590021107|gb|EXJ96304.1|	-	Allergen Asp f 4	KOG1721
g1670	contig_52	1965727	1968094	-	gi|584407712|emb|CDM36539.1|	-	-	-
g1671	contig_52	1970936	1973032	+	gi|255934863|ref|XP_002558458.1|	-	-	-
g1672	contig_52	1978756	1979199	+	-	-	-	-
g1673	contig_52	1981667	1982494	+	-	-	-	-
g1674	contig_52	1985854	1986511	+	-	-	-	-
g1675	contig_52	1990291	1992029	+	gi|159122808|gb|EDP47929.1|	-	-	-
g1676	contig_52	1995624	1996777	-	-	-	-	-
g1677	contig_52	2004110	2005606	+	gi|238499529|ref|XP_002380999.1|	-	Glucan endo-1,3-alpha-glucosidase agn1
g1678	contig_52	2007219	2010792	+	gi|255943453|ref|XP_002562495.1|	-	-	-
g1679	contig_52	2015753	2016496	-	gi|242773229|ref|XP_002478198.1|	-	-	-
g1680	contig_52	2021261	2022415	-	gi|242767329|ref|XP_002341348.1|	GO:0005515	Putative ankyrin repeat protein FPV162	KOG4177
g1681	contig_52	2029946	2030596	-	gi|255953667|ref|XP_002567586.1|	-	-	-
g1682	contig_52	2032345	2034106	-	-	-	-	-
g1683	contig_52	2034428	2035558	-	gi|358375627|dbj|GAA92207.1|	-	-	-
g1684	contig_52	2037531	2038424	-	gi|119467654|ref|XP_001257633.1|	-	-	-
g1685	contig_52	2041410	2046004	-	gi|591460186|gb|EXL91788.1|	GO:0016829	Fusicoccadiene synthase	KOG0777
g1686	contig_52	2048052	2049453	-	gi|615440152|ref|XP_007591393.1|	GO:0020037	Isotrichodermin C-15 hydroxylase	KOG0158
g1687	contig_40	3077	5646	-	gi|255952324|ref|XP_002566928.1|	-	Calcium-independent phospholipase A2-gamma	KOG4231
g1688	contig_40	6748	7348	+	gi|255951536|ref|XP_002566535.1|	-	-	-
g1689	contig_40	8483	9934	+	gi|584405932|emb|CDM38405.1|	-	-	-
g1690	contig_40	11714	12529	-	-	-	-	-
g1691	contig_40	13913	14546	+	gi|255951978|ref|XP_002566755.1|	-	-	-
g1692	contig_40	17111	18214	-	gi|255951621|ref|XP_002566577.1|	-	-	-
g1693	contig_40	20267	21124	+	gi|255951544|ref|XP_002566539.1|	-	-	-
g1694	contig_40	21741	22370	-	gi|255951846|ref|XP_002566689.1|	-	-	-
g1695	contig_40	25651	29259	-	gi|255952020|ref|XP_002566776.1|	-	-	-
g1696	contig_40	30752	31325	+	gi|255952008|ref|XP_002566770.1|	-	-	-
g1697	contig_40	31574	33310	-	gi|255952242|ref|XP_002566887.1|	GO:0005515	Ankyrin-1	KOG4177
g1698	contig_40	34025	35063	+	gi|255942026|ref|XP_002561782.1|	-	-	-
g1699	contig_40	39517	44067	-	gi|255930519|ref|XP_002556819.1|	-	Retrovirus-related Pol polyprotein from transposon TNT 1-94	KOG0017
g1700	contig_40	47044	47394	-	gi|525585530|gb|EPS31780.1|	-	UPF0135 protein lmo1452
g1701	contig_40	49447	50835	+	gi|322708185|gb|EFY99762.1|	-	-	-
g1702	contig_40	53279	53942	-	gi|255949652|ref|XP_002565593.1|	GO:0046983	-	-
g1703	contig_40	63660	64529	+	gi|350637388|gb|EHA25745.1|	-	-	-
g1704	contig_40	64929	65859	-	gi|350637389|gb|EHA25746.1|	GO:0016491	Aflatoxin biosynthesis ketoreductase nor-1	KOG1611
g1705	contig_40	66520	67702	+	gi|317033758|ref|XP_003188867.1|	-	NmrA-like family domain-containing protein 1
g1706	contig_40	70414	70987	-	gi|255952008|ref|XP_002566770.1|	-	-	-
g1707	contig_40	72482	74157	-	gi|255940120|ref|XP_002560829.1|	-	Oleate hydratase
g1708	contig_40	74919	75329	+	gi|358388790|gb|EHK26383.1|	GO:0005515	Receptor-interacting serine/threonine-protein kinase 4	KOG0504
g1709	contig_40	76812	78449	+	gi|119499371|ref|XP_001266443.1|	-	Proline-specific permease	KOG1286
g1710	contig_40	79533	83484	+	gi|584417372|emb|CDM29082.1|	-	-	-
g1711	contig_40	84379	86263	-	gi|530465098|gb|EQB47272.1|	GO:0005315	Phosphate-repressible phosphate permease	KOG2493
g1712	contig_40	88544	90684	-	gi|255935677|ref|XP_002558865.1|	-	Siderophore iron transporter 1	KOG0254
g1713	contig_40	94722	95705	-	gi|408390501|gb|EKJ69896.1|	GO:0046872	Arginase	KOG2965
g1714	contig_40	104666	105160	+	gi|584405965|emb|CDM38438.1|	-	-	-
g1715	contig_40	106217	106852	-	gi|255951810|ref|XP_002566671.1|	-	-	-
g1716	contig_40	107415	108059	+	gi|255951808|ref|XP_002566670.1|	-	-	-
g1717	contig_40	109643	111133	+	gi|255946718|ref|XP_002564126.1|	-	Uncharacterized protein YDR124W
g1718	contig_40	117743	118316	+	gi|255952008|ref|XP_002566770.1|	-	-	-
g1719	contig_40	118565	120301	-	gi|255952242|ref|XP_002566887.1|	GO:0005515	Ankyrin-1	KOG4177
g1720	contig_40	121018	122071	+	gi|255942026|ref|XP_002561782.1|	-	-	-
g1721	contig_40	126011	127452	-	gi|255951906|ref|XP_002566719.1|	-	-	-
g1722	contig_40	130369	133967	-	gi|584405796|emb|CDM38602.1|	GO:0004523	-	-
g1723	contig_40	136545	138467	+	gi|255952653|ref|XP_002567079.1|	GO:0005524	Sensor kinase protein RcsC	KOG0519
g1724	contig_40	141073	141669	+	gi|255946574|ref|XP_002564054.1|	-	Oleate hydratase
g1725	contig_40	145655	146692	-	gi|584418129|emb|CDM29848.1|	GO:0005524	-	-
g1726	contig_40	150369	154797	+	gi|358382064|gb|EHK19737.1|	GO:0005515	Ankyrin-2	KOG4177
g1727	contig_40	156731	157272	-	gi|255942028|ref|XP_002561783.1|	-	-	-
g1728	contig_40	158431	158927	+	gi|255952286|ref|XP_002566909.1|	GO:0005515	Ankyrin repeat and SOCS box protein 8	KOG0504
g1729	contig_40	160253	162920	-	gi|255951958|ref|XP_002566745.1|	GO:0046983	Putative AC transposase	KOG1121
g1730	contig_40	165011	165689	-	gi|154290041|ref|XP_001545622.1|	GO:0016491	Uncharacterized oxidoreductase C162.03	KOG1205
g1731	contig_40	166148	168206	+	gi|587730742|gb|EXA28458.1|	GO:0020037	Tabersonine 16-hydroxylase	KOG0156
g1732	contig_40	169332	169931	-	gi|407916682|gb|EKG10018.1|	GO:0016491	Levodione reductase	KOG0725
g1733	contig_40	170896	172817	+	gi|392868374|gb|EAS34153.2|	GO:0020037	Pisatin demethylase	KOG0158
g1734	contig_40	174020	175869	+	gi|587730994|gb|EXA28710.1|	GO:0008239	Cocaine esterase
g1735	contig_40	178521	180197	+	gi|255930485|ref|XP_002556802.1|	GO:0003677	Pogo transposable element with ZNF domain
g1736	contig_40	181441	182495	+	gi|317138563|ref|XP_001816994.2|	GO:0050660	-	-
g1737	contig_40	185973	186576	+	gi|255932985|ref|XP_002557963.1|	-	Nitrogen assimilation transcription factor nit-4
g1738	contig_40	191189	192566	-	gi|391868609|gb|EIT77819.1|	-	White collar 1 protein	KOG0498
g1739	contig_40	194595	196157	+	gi|584414989|emb|CDM26679.1|	GO:0005524	Mitogen-activated protein kinase HOG1	KOG0660
g1740	contig_40	197360	198324	-	gi|255952568|ref|XP_002567037.1|	-	-	-
g1741	contig_40	206678	207307	+	gi|255951846|ref|XP_002566689.1|	-	-	-
g1742	contig_40	207924	208781	-	gi|255951544|ref|XP_002566539.1|	-	-	-
g1743	contig_40	211110	211937	+	gi|255951621|ref|XP_002566577.1|	-	-	-
g1744	contig_0	4039	7741	+	gi|584405912|emb|CDM38496.1|	GO:0050660	Vanillyl-alcohol oxidase
g1745	contig_0	10672	12388	+	gi|238485494|ref|XP_002373985.1|	GO:0008270	Uncharacterized transcriptional regulatory protein C530.05
g1746	contig_0	13111	15803	-	gi|342886370|gb|EGU86233.1|	GO:0008270	Uncharacterized transcriptional regulatory protein C530.05
g1747	contig_0	16816	20513	+	gi|584405796|emb|CDM38602.1|	GO:0004523	Putative 115 kDa protein in type-1 retrotransposable element R1DM	KOG1075
g1748	contig_0	25491	27683	+	gi|425768566|gb|EKV07085.1|	-	-	-
g1749	contig_0	27961	29371	-	gi|525582796|gb|EPS29046.1|	GO:0005524	Probable mitochondrial chaperone BCS1-B	KOG0743
g1750	contig_0	32676	33485	-	gi|225554322|gb|EEH02621.1|	-	-	-
g1751	contig_0	34500	35171	+	gi|240281219|gb|EER44722.1|	-	-	-
g1752	contig_0	40547	41396	-	gi|525579949|gb|EPS26199.1|	-	-	-
g1753	contig_0	42966	44824	+	gi|302890581|ref|XP_003044174.1|	-	Uncharacterized MFS-type transporter C1271.10c	KOG0255
g1754	contig_0	47497	48537	+	gi|302890699|ref|XP_003044233.1|	GO:0016810	Omega-amidase NIT2	KOG0806
g1755	contig_0	51819	53380	+	gi|302890697|ref|XP_003044232.1|	GO:0008270	Uncharacterized transcriptional regulatory protein C965.10
g1756	contig_0	58126	59628	+	gi|255947230|ref|XP_002564382.1|	GO:0016831	Ferulic acid decarboxylase 1
g1757	contig_0	60025	62208	+	gi|584408190|emb|CDM37021.1|	GO:0008270	-	-
g1758	contig_0	63618	64229	+	gi|584408191|emb|CDM37022.1|	GO:0003824	Phenylacrylic acid decarboxylase
g1759	contig_0	65703	67053	-	gi|255951214|ref|XP_002566374.1|	GO:0016491	Aldehyde dehydrogenase	KOG2450
g1760	contig_0	72760	74792	+	gi|255938223|ref|XP_002559882.1|	GO:0008233	2-hydroxy-6-oxo-6-phenylhexa-2,4-dienoate hydrolase	KOG4409
g1761	contig_0	82757	83181	+	gi|255943461|ref|XP_002562499.1|	-	-	-
g1762	contig_0	84015	84809	-	gi|584407699|emb|CDM36526.1|	-	-	-
g1763	contig_0	85477	85842	+	-	-	-	-
g1764	contig_0	86711	88325	-	gi|584405933|emb|CDM38406.1|	-	-	-
g1765	contig_11	1	809	+	-	-	-	-
g1766	contig_11	4168	4825	+	-	-	-	-
g1767	contig_11	8172	10500	-	gi|584405954|emb|CDM38427.1|	-	-	-
g1768	contig_11	11212	11672	+	gi|599159439|gb|EYE98460.1|	-	-	-
g1769	contig_11	13809	16292	+	gi|159122808|gb|EDP47929.1|	-	-	-
g1770	contig_11	18937	19413	+	gi|255943461|ref|XP_002562499.1|	-	-	-
g1771	contig_55	1	7244	+	gi|317031358|ref|XP_001393252.2|	-	Putative 115 kDa protein in type-1 retrotransposable element R1DM	KOG1075
g1772	contig_55	7329	9263	+	gi|584406873|emb|CDM37176.1|	GO:0003964	RNA-directed DNA polymerase from mobile element jockey	KOG1075
g1773	contig_55	11442	14891	+	gi|121715089|ref|XP_001275154.1|	GO:0020037	Pisatin demethylase	KOG0158
g1774	contig_55	15039	15377	+	gi|67902440|ref|XP_681476.1|	-	-	-
g1775	contig_55	17718	27045	-	gi|591404434|gb|EXL39571.1|	GO:0046872	P-type cation-transporting ATPase	KOG0207
g1776	contig_55	28262	29620	-	gi|255946401|ref|XP_002563968.1|	-	-	-
g1777	contig_55	32963	35058	+	gi|255934863|ref|XP_002558458.1|	-	-	-
g1778	contig_59	1	3764	-	gi|255934917|ref|XP_002558485.1|	-	-	-
g1779	contig_59	6599	7934	+	gi|425768563|gb|EKV07082.1|	-	-	-
g1780	contig_59	14871	15125	+	-	-	-	-
g1781	contig_59	17618	18445	+	-	-	-	-
g1782	contig_75	197	1825	-	gi|154271288|ref|XP_001536497.1|	-	Retrotransposable element Tf2 155 kDa protein type 2	KOG0017
g1783	contig_75	2254	2886	-	gi|242816502|ref|XP_002486791.1|	-	Retrotransposable element Tf2 155 kDa protein type 3	KOG0017
g1784	contig_45	2498	7539	+	gi|154287136|ref|XP_001544363.1|	GO:0008026	ATP-dependent DNA helicase Q1	KOG0351
g1785	contig_6	1225	5577	-	gi|255934871|ref|XP_002558462.1|	-	Calcium-independent phospholipase A2-gamma
g1786	contig_6	6067	7085	+	gi|255951838|ref|XP_002566685.1|	-	-	-
g1787	contig_6	7735	9328	+	gi|525586910|gb|EPS33160.1|	GO:0004553	Endochitinase 1	KOG2806
g1788	contig_6	10076	10393	+	gi|584407710|emb|CDM36537.1|	-	-	-
g1789	contig_6	12789	13472	-	gi|525580228|gb|EPS26478.1|	-	Allergen Asp f 4
g1790	contig_10	745	1214	+	-	-	-	-
g1791	contig_10	2601	4005	+	-	-	-	-
g1792	contig_10	5520	5984	-	gi|425781333|gb|EKV19307.1|	-	-	-
g1793	contig_69	1	5083	-	gi|154287136|ref|XP_001544363.1|	GO:0008026	ATP-dependent DNA helicase Q1	KOG0351
g1794	contig_69	5565	6524	-	gi|599154121|gb|EYE93392.1|	-	-	-
g1795	contig_69	8175	8681	-	gi|584414024|emb|CDM32800.1|	-	-	-
g1796	contig_69	10912	14349	-	-	-	-	-
g1797	contig_72	1	4862	-	gi|154287136|ref|XP_001544363.1|	GO:0008026	ATP-dependent DNA helicase Q1	KOG0351
g1798	contig_72	10299	12192	-	gi|119501545|ref|XP_001267529.1|	GO:0022857	Quinate permease	KOG0254
g1799	contig_72	13270	13667	+	-	-	-	-
g1800	contig_72	14712	15962	+	gi|495489677|ref|WP_008214360.1|	-	-	-
g1801	contig_72	23690	25336	-	gi|317155103|ref|XP_001824919.2|	GO:0005524	Probable mitochondrial chaperone BCS1-B	KOG0743
g1802	contig_72	29036	30235	-	gi|516162627|ref|WP_017588197.1|	-	Lysine-specific histone demethylase 1B	KOG0029
g1803	contig_72	32252	33565	+	gi|322695815|gb|EFY87617.1|	-	UPF0187 protein alr2987
g1804	contig_72	35931	37095	-	gi|516148271|ref|WP_017578851.1|	-	Probable polyamine oxidase 4
g1805	contig_72	38595	40395	-	gi|317146835|ref|XP_001821703.2|	-	Uncharacterized transporter C1002.16c	KOG2533
g1806	contig_72	44400	45056	+	gi|584415511|emb|CDM27207.1|	-	-	-
g1807	contig_72	45854	47532	-	gi|255951178|ref|XP_002566356.1|	GO:0022857	High-affinity glucose transporter	KOG0254
g1808	contig_72	52640	54043	+	gi|255951172|ref|XP_002566353.1|	-	-	-
g1809	contig_72	54390	55108	-	gi|255951170|ref|XP_002566352.1|	GO:0016491	Putative peroxiredoxin pmp20	KOG0541
g1810	contig_72	55870	57027	-	gi|584415519|emb|CDM27215.1|	-	3-dehydroshikimate dehydratase
g1811	contig_72	59895	60831	-	gi|425771783|gb|EKV10219.1|	GO:0016787	Uncharacterized AIM2 family protein C30D10.14	KOG3043
g1812	contig_72	64028	65269	+	gi|425771782|gb|EKV10218.1|	GO:0008270	Protein krueppel	KOG1721
g1813	contig_72	66310	67581	+	gi|425771781|gb|EKV10217.1|	GO:0016491	-	-
g1814	contig_72	67844	69678	-	gi|584415531|emb|CDM27227.1|	GO:0050661	FAD-containing monooxygenase EthA	KOG1399
g1815	contig_72	71710	73140	+	gi|584415529|emb|CDM27225.1|	-	-	-
g1816	contig_72	73965	75391	+	gi|500258837|gb|EOO01724.1|	-	-	-
g1817	contig_72	80055	82889	-	gi|255939742|ref|XP_002560640.1|	-	Uncharacterized transporter C757.13	KOG2533
g1818	contig_72	83924	84922	+	gi|584415527|emb|CDM27223.1|	GO:0016491	Alcohol dehydrogenase	KOG0023
g1819	contig_72	86930	89782	+	gi|255951146|ref|XP_002566340.1|	-	-	-
g1820	contig_72	93923	95212	+	gi|584415536|emb|CDM27232.1|	GO:0008270	-	-
g1821	contig_72	98980	101518	+	gi|425771786|gb|EKV10222.1|	GO:0043565	Nitrogen regulatory protein areA	KOG1601
g1822	contig_72	102138	102637	-	gi|584415539|emb|CDM27235.1|	-	-	-
g1823	contig_72	104963	106093	+	gi|525582141|gb|EPS28391.1|	-	Pre-rRNA-processing protein ipi1	KOG2149
g1824	contig_72	106586	108364	-	gi|425777075|gb|EKV15265.1|	GO:0015205	Allantoin permease	KOG2466
g1825	contig_72	108719	109573	-	gi|584415547|emb|CDM27243.1|	-	-	-
g1826	contig_72	111087	116169	-	gi|584415545|emb|CDM27241.1|	GO:0019901	Probable cysteine desulfurase	KOG1674
g1827	contig_72	116682	117338	-	gi|255951130|ref|XP_002566332.1|	-	-	-
g1828	contig_72	117908	120772	-	gi|584415542|emb|CDM27238.1|	-	-	-
g1829	contig_72	122773	129520	-	gi|255951120|ref|XP_002566327.1|	GO:0005524	Helicase SEN1	KOG1801
g1830	contig_72	130674	135408	-	gi|255951118|ref|XP_002566326.1|	GO:0046872	Phospholipid-transporting ATPase DNF1	KOG0206
g1831	contig_72	137644	139963	+	gi|255951116|ref|XP_002566325.1|	-	-	-
g1832	contig_72	140263	141063	-	gi|255951114|ref|XP_002566324.1|	GO:0046961	V-type proton ATPase subunit E	KOG1664
g1833	contig_72	141303	143251	+	gi|425771577|gb|EKV10015.1|	-	-	-
g1834	contig_72	144698	145493	-	gi|584415555|emb|CDM27251.1|	GO:0043565	Transcription factor of morphogenesis MCM1	KOG0015
g1835	contig_72	147367	148995	-	gi|255951106|ref|XP_002566320.1|	-	-	-
g1836	contig_72	152428	154325	+	gi|576921263|gb|EUC35407.1|	GO:0050661	Putative sterigmatocystin biosynthesis monooxygenase stcW	KOG1399
g1837	contig_72	154454	158752	-	gi|584415645|emb|CDM27342.1|	GO:0016787	Uncharacterized protein C11D3.15	KOG1939
g1838	contig_72	159069	160601	+	gi|255950916|ref|XP_002566225.1|	-	Uncharacterized transporter C757.13	KOG2533
g1839	contig_72	161189	162481	+	gi|584415643|emb|CDM27340.1|	GO:0016491	L-pipecolate oxidase	KOG2820
g1840	contig_72	162593	163794	-	gi|255950920|ref|XP_002566227.1|	-	-	-
g1841	contig_72	164898	166485	+	gi|255950922|ref|XP_002566228.1|	GO:0016491	Aldehyde dehydrogenase, dimeric NADP-preferring	KOG2456
g1842	contig_72	167029	168726	+	gi|584415640|emb|CDM27337.1|	-	-	-
g1843	contig_72	168830	169543	-	gi|584415639|emb|CDM27336.1|	-	-	-
g1844	contig_72	170022	171869	-	gi|425771558|gb|EKV09997.1|	-	Rab proteins geranylgeranyltransferase component A	KOG1439
g1845	contig_72	175660	176257	-	gi|169778787|ref|XP_001823858.1|	GO:0003755	Peptidyl-prolyl cis-trans isomerase-like 1	KOG0881
g1846	contig_72	176481	178316	+	gi|425771554|gb|EKV09993.1|	GO:0004190	Probable intramembrane protease C25B8.17	KOG2443
g1847	contig_72	178502	179680	-	gi|255950938|ref|XP_002566236.1|	-	Exosome complex component rrp43	KOG1613
g1848	contig_72	181057	183282	+	gi|255950940|ref|XP_002566237.1|	GO:0050660	Ferric/cupric reductase transmembrane component 7	KOG0039
g1849	contig_72	183508	184554	-	gi|425771551|gb|EKV09990.1|	-	N-alpha-acetyltransferase 50	KOG3138
g1850	contig_72	185077	186019	+	gi|584415632|emb|CDM27329.1|	-	-	-
g1851	contig_72	187672	189135	+	gi|255950946|ref|XP_002566240.1|	GO:0030528	Uncharacterized protein C1A6.01c	KOG2845
g1852	contig_72	191300	193783	+	gi|584415630|emb|CDM27327.1|	GO:0020037	Probable sterigmatocystin biosynthesis P450 monooxygenase stcL	KOG0158
g1853	contig_72	194217	196272	-	gi|584415628|emb|CDM27325.1|	-	Putative HC-toxin efflux carrier TOXA	KOG0254
g1854	contig_72	197649	198809	+	gi|425771545|gb|EKV09984.1|	-	Putative aryl-alcohol dehydrogenase AAD14	KOG1575
g1855	contig_72	199376	200915	-	gi|425771544|gb|EKV09983.1|	GO:0016773	Glucokinase	KOG1369
g1856	contig_72	204616	206578	-	gi|255953645|ref|XP_002567575.1|	GO:0016491	3-hydroxybutyryl-CoA dehydrogenase	KOG2304
g1857	contig_72	207148	208609	+	gi|255953643|ref|XP_002567574.1|	GO:0020037	NADH-cytochrome b5 reductase 1	KOG0534
g1858	contig_72	209300	211083	+	gi|584412113|emb|CDM30878.1|	GO:0020037	Cytochrome P450 4F8	KOG0157
g1859	contig_72	212020	212782	+	gi|584415625|emb|CDM27322.1|	-	Probable altered inheritance of mitochondria protein 13, mitochondrial
g1860	contig_72	213079	215792	-	gi|255950962|ref|XP_002566248.1|	GO:0004526	Ribonucleases P/MRP protein subunit pop1	KOG3322
g1861	contig_72	216006	218119	-	gi|584415623|emb|CDM27320.1|	-	Uncharacterized transporter C3H1.06c
g1862	contig_72	218844	219777	-	gi|255950966|ref|XP_002566250.1|	-	Uncharacterized protein C26H8.11c	KOG4781
g1863	contig_72	220015	221848	-	gi|255950968|ref|XP_002566251.1|	GO:0005515	Ubiquitin carboxyl-terminal hydrolase 6	KOG1872
g1864	contig_72	222197	222964	+	gi|70984667|ref|XP_747840.1|	-	Actin-related protein 2/3 complex subunit 4	KOG1876
g1865	contig_72	224762	227295	+	gi|584415619|emb|CDM27316.1|	-	-	-
g1866	contig_72	229369	231604	+	gi|584415618|emb|CDM27315.1|	-	-	-
g1867	contig_72	235474	236810	+	gi|584415614|emb|CDM27311.1|	GO:0008270	-	-
g1868	contig_72	238974	242961	-	gi|255950980|ref|XP_002566257.1|	GO:0005524	Probable serine/threonine-protein kinase HSL1	KOG0588
g1869	contig_72	245900	247622	+	gi|317141133|ref|XP_001817379.2|	GO:0050660	Bifunctional solanapyrone synthase
g1870	contig_72	248426	248782	+	-	-	-	-
g1871	contig_72	249460	250119	-	gi|255950988|ref|XP_002566261.1|	-	-	-
g1872	contig_72	250917	251878	+	gi|255950990|ref|XP_002566262.1|	-	Pyrroline-5-carboxylate reductase	KOG3124
g1873	contig_72	251969	253124	-	gi|557724488|dbj|GAD96890.1|	GO:0016491	Uncharacterized oxidoreductase C736.13
g1874	contig_72	254868	255684	+	gi|302884412|ref|XP_003041102.1|	-	-	-
g1875	contig_72	256240	256961	+	gi|255951000|ref|XP_002566267.1|	GO:0016491	Putative peroxiredoxin pmp20	KOG0541
g1876	contig_72	257383	261677	-	gi|584415602|emb|CDM27299.1|	-	Uncharacterized RWD, RING finger and WD repeat-containing protein C11E3.05	KOG0309
g1877	contig_72	262117	262735	+	gi|525582188|gb|EPS28438.1|	GO:0016881	Ubiquitin-conjugating enzyme E2 36	KOG0417
g1878	contig_72	263376	264210	+	gi|225678099|gb|EEH16383.1|	GO:0003735	60S ribosomal protein L24	KOG1722
g1879	contig_72	265090	265725	-	gi|584415599|emb|CDM27296.1|	GO:0008080	Glucosamine 6-phosphate N-acetyltransferase	KOG3396
g1880	contig_72	266245	268124	-	gi|425771612|gb|EKV10050.1|	GO:0016829	Fumarate hydratase, mitochondrial	KOG1317
g1881	contig_72	268353	269558	-	gi|584415597|emb|CDM27294.1|	GO:0016787	AB hydrolase superfamily protein C1039.03	KOG1515
g1882	contig_72	270398	271754	+	gi|255951014|ref|XP_002566274.1|	GO:0030170	Aspartate aminotransferase, cytoplasmic	KOG1412
g1883	contig_72	272263	273641	-	gi|584415595|emb|CDM27292.1|	-	Cell fusion protein cfr1	KOG1181
g1884	contig_72	273962	274471	-	gi|255951018|ref|XP_002566276.1|	-	-	-
g1885	contig_72	275092	275705	+	gi|121704030|ref|XP_001270279.1|	GO:0003743	Eukaryotic translation initiation factor 1A	KOG3403
g1886	contig_72	276455	278708	-	gi|584415591|emb|CDM27288.1|	GO:0008236	-	-
g1887	contig_72	279030	282313	-	gi|255951024|ref|XP_002566279.1|	GO:0004518	DNA repair protein rad16	KOG0442
g1888	contig_72	282828	283099	-	gi|255951026|ref|XP_002566280.1|	-	-	-
g1889	contig_72	284792	289141	+	gi|255951034|ref|XP_002566284.1|	GO:0046873	Mitochondrial inner membrane magnesium transporter mrs2	KOG2662
g1890	contig_72	289378	292654	-	gi|212543469|ref|XP_002151889.1|	GO:0020037	tRNA (uracil-O(2)-)-methyltransferase	KOG0159
g1891	contig_72	292976	293885	+	gi|212543467|ref|XP_002151888.1|	GO:0046872	Meiotically up-regulated gene 14 protein	KOG3699
g1892	contig_72	294464	298370	+	gi|212543465|ref|XP_002151887.1|	-	General amino acid permease AGP2	KOG1286
g1893	contig_72	298875	301110	-	gi|70995430|ref|XP_752470.1|	GO:0022857	Sugar transporter STL1	KOG0254
g1894	contig_72	303196	304224	+	gi|255951040|ref|XP_002566287.1|	-	Sedoheptulose 1,7-bisphosphatase	KOG0235
g1895	contig_72	304439	304849	-	gi|255951042|ref|XP_002566288.1|	-	High osmolarity sensitivity protein 3
g1896	contig_72	305752	308247	-	gi|255951044|ref|XP_002566289.1|	GO:0050661	Meiotically up-regulated gene 72 protein
g1897	contig_72	311657	313596	-	gi|425771595|gb|EKV10033.1|	GO:0008026	ATP-dependent RNA helicase sub2	KOG0329
g1898	contig_72	313874	314446	+	gi|425771594|gb|EKV10032.1|	-	Ribonuclease P protein subunit rpr2
g1899	contig_72	315471	316039	-	gi|584415574|emb|CDM27270.1|	-	-	-
g1900	contig_72	316983	317846	+	gi|584415573|emb|CDM27269.1|	-	Protein saf1
g1901	contig_72	318789	321084	-	gi|584415572|emb|CDM27268.1|	GO:0005524	G2-specific protein kinase nimA	KOG0591
g1902	contig_72	321753	323783	+	gi|255951056|ref|XP_002566295.1|	GO:0005515	BTB/POZ domain-containing protein 3	KOG0511
g1903	contig_72	324258	324629	-	gi|255951058|ref|XP_002566296.1|	-	-	-
g1904	contig_72	324826	328617	+	gi|255951060|ref|XP_002566297.1|	GO:0005524	Structural maintenance of chromosomes protein 5	KOG0979
g1905	contig_72	334712	335614	+	gi|255951068|ref|XP_002566301.1|	-	Zinc finger protein C25B8.19c	KOG1721
g1906	contig_72	336147	341024	-	gi|584415564|emb|CDM27260.1|	GO:0016491	Uncharacterized lactate 2-monooxygenase PB1A11.03	KOG2088
g1907	contig_72	341704	342612	-	gi|425771583|gb|EKV10021.1|	-	Vegetative incompatibility protein HET-E-1	KOG0295
g1908	contig_72	343205	344824	+	gi|584415559|emb|CDM27255.1|	-	Uncharacterized transporter C1002.16c	KOG2533
g1909	contig_72	346084	347728	-	gi|238501068|ref|XP_002381768.1|	GO:0020037	Cytochrome P450 52A13	KOG0157
g1910	contig_72	348250	350244	+	gi|255951082|ref|XP_002566308.1|	GO:0003824	Squalene--hopene cyclase	KOG0497
g1911	contig_72	351712	352899	+	gi|134077166|emb|CAK45507.1|	-	-	-
g1912	contig_72	353631	361311	+	gi|115386646|ref|XP_001209864.1|	GO:0042626	Leptomycin B resistance protein pmd1	KOG1382
g1913	contig_72	361774	364399	-	gi|425771563|gb|EKV10002.1|	-	Nascent polypeptide-associated complex subunit beta	KOG2240
g1914	contig_72	364644	365750	-	gi|255950904|ref|XP_002566219.1|	GO:0016491	Uncharacterized oxidoreductase C736.13	KOG1208
g1915	contig_72	366218	366973	+	gi|255950902|ref|XP_002566218.1|	-	UPF0483 protein C25G4.2	KOG2551
g1916	contig_72	367255	368272	-	gi|238499497|ref|XP_002380983.1|	GO:0016787	Acyl-protein thioesterase 1	KOG2112
g1917	contig_72	368460	370985	-	gi|255950856|ref|XP_002566195.1|	GO:0004026	Uncharacterized protein AFUA_6G02800
g1918	contig_72	371663	372285	-	gi|255950860|ref|XP_002566197.1|	GO:0005375	-	-
g1919	contig_72	372535	374681	+	gi|584415666|emb|CDM27363.1|	GO:0050660	Ferric/cupric reductase transmembrane component 2	KOG0039
g1920	contig_72	375382	376077	+	gi|322702896|gb|EFY94516.1|	-	Ankyrin repeat and KH domain-containing protein CBG24701	KOG4177
g1921	contig_72	376253	377895	-	gi|115399991|ref|XP_001215584.1|	GO:0004185	Carboxypeptidase Y	KOG1282
g1922	contig_72	378276	379836	-	gi|255953051|ref|XP_002567278.1|	-	-	-
g1923	contig_72	381084	381815	+	gi|121716483|ref|XP_001275821.1|	-	-	-
g1924	contig_72	383063	384069	-	gi|350639409|gb|EHA27763.1|	-	-	-
g1925	contig_72	385357	385961	+	gi|584415665|emb|CDM27362.1|	GO:0016491	Putative redox protein fmp46, mitochondrial
g1926	contig_72	386344	388391	-	gi|255950866|ref|XP_002566200.1|	GO:0005524	Serine/threonine-protein kinase sid2	KOG0605
g1927	contig_72	389047	389537	-	gi|255950868|ref|XP_002566201.1|	-	-	-
g1928	contig_72	392647	393672	+	gi|587659754|gb|EWY82122.1|	-	-	-
g1929	contig_72	394810	398956	-	gi|599156112|gb|EYE95273.1|	GO:0008270	Nitrogen assimilation transcription factor nit-4
g1930	contig_72	399214	399918	-	gi|255950876|ref|XP_002566205.1|	GO:0005515	Glutathione S-transferase 3	KOG0867
g1931	contig_72	402709	404402	+	gi|584410826|emb|CDM34857.1|	-	Gluconolactonase
g1932	contig_72	406105	408468	+	gi|584415659|emb|CDM27356.1|	GO:0008270	Sterol uptake control protein 2
g1933	contig_72	410153	411000	+	gi|255950878|ref|XP_002566206.1|	-	-	-
g1934	contig_72	411204	413314	+	gi|425771462|gb|EKV09904.1|	GO:0003824	Mitochondrial 2-methylisocitrate lyase	KOG1260
g1935	contig_72	413809	414555	-	gi|119483528|ref|XP_001261667.1|	-	-	-
g1936	contig_72	418282	418776	-	gi|255950884|ref|XP_002566209.1|	-	-	-
g1937	contig_72	421303	424374	+	gi|584415656|emb|CDM27353.1|	GO:0016758	Chitin synthase C	KOG2571
g1938	contig_72	426837	428308	+	gi|255950890|ref|XP_002566212.1|	-	-	-
g1939	contig_72	431169	432629	-	gi|584415654|emb|CDM27351.1|	-	UPF0311 protein YveG
g1940	contig_72	433959	436340	-	gi|584415653|emb|CDM27350.1|	GO:0005515	Meiotic recombination protein rec8	KOG1213
g1941	contig_72	437253	440046	-	gi|584415652|emb|CDM27349.1|	GO:0051287	Protein arg-6, mitochondrial	KOG2436
g1942	contig_72	441389	446377	-	gi|358400335|gb|EHK49666.1|	GO:0042802	Synaptobrevin homolog 1	KOG1840
g1943	contig_72	448788	450209	+	gi|557729847|dbj|GAD91614.1|	-	Mannan endo-1,6-alpha-mannosidase DCW1
g1944	contig_72	450901	451683	+	gi|350630015|gb|EHA18388.1|	-	-	-
g1945	contig_72	452090	452573	-	gi|425771475|gb|EKV09917.1|	-	Assembly factor cbp4
g1946	contig_72	453725	458530	+	gi|584415672|emb|CDM27370.1|	GO:0016491	Chitin synthase regulatory factor 3	KOG1550
g1947	contig_72	458705	459223	-	gi|425771478|gb|EKV09920.1|	-	NADH-ubiquinone oxidoreductase 10.5 kDa subunit	KOG3446
g1948	contig_72	459595	460418	+	gi|255950842|ref|XP_002566188.1|	-	Probable mitochondrial pyruvate carrier 1	KOG1589
g1949	contig_72	461214	462941	+	gi|584415676|emb|CDM27374.1|	GO:0004650	Probable exopolygalacturonase X
g1950	contig_72	463274	465107	-	gi|317137406|ref|XP_001727704.2|	-	Uncharacterized MFS-type transporter C1271.10c	KOG0255
g1951	contig_72	466277	467285	+	gi|238489551|ref|XP_002376013.1|	GO:0016491	15-hydroxyprostaglandin dehydrogenase [NAD(+)]	KOG4169
g1952	contig_72	467576	469997	-	gi|584415688|emb|CDM27386.1|	GO:0008270	Regulatory protein MIG2
g1953	contig_72	470338	472436	-	gi|115386586|ref|XP_001209834.1|	GO:0050661	Putative sterigmatocystin biosynthesis monooxygenase stcW	KOG1399
g1954	contig_72	477905	480088	+	gi|525582273|gb|EPS28523.1|	GO:0004497	Phenol 2-monooxygenase
g1955	contig_72	483779	484511	+	gi|425770483|gb|EKV08953.1|	-	-	-
g1956	contig_72	485048	486271	-	gi|255711900|ref|XP_002552233.1|	-	Uncharacterized protein C285.05
g1957	contig_72	486974	487648	+	gi|169785773|ref|XP_001827347.1|	-	Putative xanthine/uracil permease C887.17
g1958	contig_72	489929	492877	+	gi|584415689|emb|CDM27387.1|	-	-	-
g1959	contig_72	494307	496301	-	gi|255950796|ref|XP_002566165.1|	GO:0003824	Putative dihydroxy-acid dehydratase, mitochondrial	KOG2448
g1960	contig_72	496756	498136	-	gi|255950794|ref|XP_002566164.1|	GO:0016627	Acyl-CoA dehydrogenase fadE12	KOG0141
g1961	contig_72	499184	500290	+	gi|255933047|ref|XP_002557994.1|	-	-	-
g1962	contig_72	500519	502062	-	gi|13021726|gb|AAK11533.1|	GO:0022857	Probable metabolite transport protein GIT1	KOG0252
g1963	contig_72	502742	503505	-	-	-	-	-
g1964	contig_72	503643	504287	+	gi|584415708|emb|CDM27406.1|	-	-	-
g1965	contig_72	504516	508033	-	gi|302501374|ref|XP_003012679.1|	-	Putative beta-lactamase-like 1
g1966	contig_72	509543	510916	+	gi|584415706|emb|CDM27404.1|	GO:0050660	Bifunctional solanapyrone synthase
g1967	contig_72	510971	512008	-	gi|584415705|emb|CDM27403.1|	-	Aflatoxin B1 aldehyde reductase member 3	KOG1575
g1968	contig_72	512218	513089	-	gi|425771492|gb|EKV09934.1|	-	-	-
g1969	contig_72	513404	514698	-	gi|255950780|ref|XP_002566157.1|	-	-	-
g1970	contig_72	515029	515978	+	gi|425771494|gb|EKV09936.1|	-	-	-
g1971	contig_72	518547	519317	+	gi|255950774|ref|XP_002566154.1|	GO:0004659	-	-
g1972	contig_72	520346	521302	+	gi|584415699|emb|CDM27397.1|	GO:0016491	Retinol dehydrogenase 12	KOG1208
g1973	contig_72	521939	524377	+	gi|584415697|emb|CDM27395.1|	GO:0003824	HC-toxin synthetase	KOG1178
g1974	contig_72	525210	526706	+	gi|358375618|dbj|GAA92198.1|	-	Probable pectine lyase F
g1975	contig_72	527309	528292	-	gi|255950768|ref|XP_002566151.1|	-	-	-
g1976	contig_72	529247	533771	-	gi|255950766|ref|XP_002566150.1|	GO:0008270	Deoxyribodipyrimidine photo-lyase
g1977	contig_72	534767	535759	+	gi|425771503|gb|EKV09945.1|	-	-	-
g1978	contig_72	535974	538737	-	gi|584415714|emb|CDM27412.1|	GO:0015299	K(+)/H(+) antiporter 1	KOG1650
g1979	contig_72	539943	541974	+	gi|255930793|ref|XP_002556953.1|	-	-	-
g1980	contig_72	544784	545305	-	gi|255930791|ref|XP_002556952.1|	GO:0016831	-	-
g1981	contig_72	545994	550295	-	gi|425771505|gb|EKV09947.1|	GO:0042626	ABC transporter CDR4	KOG0065
g1982	contig_72	551921	552545	+	gi|584415716|emb|CDM27414.1|	-	Zinc-type alcohol dehydrogenase-like protein C1198.01	KOG0024
g1983	contig_72	552920	554096	+	gi|255950756|ref|XP_002566145.1|	GO:0003824	Putative branched-chain-amino-acid aminotransferase TOXF	KOG0975
g1984	contig_72	554340	557495	-	gi|425771342|gb|EKV09787.1|	-	-	-
g1985	contig_72	558163	561576	-	gi|255950750|ref|XP_002566142.1|	GO:0016891	Serine/threonine-protein kinase ppk4	KOG1027
g1986	contig_72	562599	564082	-	gi|425771344|gb|EKV09789.1|	-	Mannan endo-1,6-alpha-mannosidase DCW1
g1987	contig_72	565040	566825	-	gi|525583269|gb|EPS29519.1|	GO:0005524	Probable T-complex protein 1 subunit beta	KOG0363
g1988	contig_72	567050	569059	+	gi|584415721|emb|CDM27419.1|	GO:0003755	Peptidyl-prolyl cis-trans isomerase cyp15	KOG0882
g1989	contig_72	569496	570378	-	gi|425771348|gb|EKV09793.1|	-	-	-
g1990	contig_72	574591	575041	-	gi|594716318|gb|EXU99222.1|	-	-	-
g1991	contig_72	575928	577575	+	gi|599153670|gb|EYE92959.1|	GO:0008270	-	-
g1992	contig_72	578594	579448	+	gi|255945655|ref|XP_002563595.1|	-	-	-
g1993	contig_72	580566	581727	-	gi|584417385|emb|CDM29095.1|	-	-	-
g1994	contig_72	582237	583993	+	gi|584417386|emb|CDM29096.1|	-	-	-
g1995	contig_72	584997	585803	-	gi|425769527|gb|EKV08019.1|	-	-	-
g1996	contig_72	588835	590435	-	gi|255945657|ref|XP_002563596.1|	-	Uncharacterized transporter C530.02	KOG0255
g1997	contig_72	593298	594138	-	gi|255945985|ref|XP_002563760.1|	GO:0016788	-	-
g1998	contig_72	597140	599323	-	gi|452986676|gb|EME86432.1|	GO:0004565	Beta-galactosidase
[truncated: 9,082 more rows]

## Sheet: ATCC 48735
Table S2. Function annotation for predicted genes in P. capsulatum strain (ATCC 48735)
Gene ID	Contig	start	end	strain	NR database	Molecular Function	Swiss-prot	KOG
g1	contig_57	1055	6100	-	gi|154287136|ref|XP_001544363.1|	GO:0008026	ATP-dependent DNA helicase Q1	KOG0351
g2	contig_57	11537	13430	-	gi|119501545|ref|XP_001267529.1|	GO:0022857	Quinate permease	KOG0254
g3	contig_57	14508	14905	+	-	-	-	-
g4	contig_57	15950	17200	+	gi|495489677|ref|WP_008214360.1|	-	-	-
g5	contig_57	24928	26574	-	gi|317155103|ref|XP_001824919.2|	GO:0005524	Probable mitochondrial chaperone BCS1-B	KOG0743
g6	contig_57	30274	31473	-	gi|516162627|ref|WP_017588197.1|	-	Lysine-specific histone demethylase 1B	KOG0029
g7	contig_57	33490	34803	+	gi|322695815|gb|EFY87617.1|	-	UPF0187 protein alr2987
g8	contig_57	37169	38333	-	gi|516148271|ref|WP_017578851.1|	-	Probable polyamine oxidase 4
g9	contig_57	39833	41633	-	gi|317146835|ref|XP_001821703.2|	-	Uncharacterized transporter C1002.16c	KOG2533
g10	contig_57	45638	46294	+	gi|584415511|emb|CDM27207.1|	-	-	-
g11	contig_57	47092	48770	-	gi|255951178|ref|XP_002566356.1|	GO:0022857	High-affinity glucose transporter	KOG0254
g12	contig_57	53878	55281	+	gi|255951172|ref|XP_002566353.1|	-	-	-
g13	contig_57	55628	56346	-	gi|255951170|ref|XP_002566352.1|	GO:0016491	Putative peroxiredoxin pmp20	KOG0541
g14	contig_57	57108	58265	-	gi|584415519|emb|CDM27215.1|	-	3-dehydroshikimate dehydratase
g15	contig_57	61133	62069	-	gi|425771783|gb|EKV10219.1|	GO:0016787	Uncharacterized AIM2 family protein C30D10.14	KOG3043
g16	contig_57	65266	66507	+	gi|425771782|gb|EKV10218.1|	GO:0008270	Protein krueppel	KOG1721
g17	contig_57	67548	68819	+	gi|425771781|gb|EKV10217.1|	GO:0016491	-	-
g18	contig_57	69082	70916	-	gi|584415531|emb|CDM27227.1|	GO:0050661	FAD-containing monooxygenase EthA	KOG1399
g19	contig_57	72948	74378	+	gi|584415529|emb|CDM27225.1|	-	-	-
g20	contig_57	75203	76629	+	gi|500258837|gb|EOO01724.1|	-	-	-
g21	contig_57	81293	84127	-	gi|255939742|ref|XP_002560640.1|	-	Uncharacterized transporter C757.13	KOG2533
g22	contig_57	85162	86160	+	gi|584415527|emb|CDM27223.1|	GO:0016491	Alcohol dehydrogenase	KOG0023
g23	contig_57	88168	91020	+	gi|255951146|ref|XP_002566340.1|	-	-	-
g24	contig_57	95161	96450	+	gi|584415536|emb|CDM27232.1|	GO:0008270	-	-
g25	contig_57	100214	102752	+	gi|425771786|gb|EKV10222.1|	GO:0043565	Nitrogen regulatory protein areA	KOG1601
g26	contig_57	103372	103871	-	gi|584415539|emb|CDM27235.1|	-	-	-
g27	contig_57	106197	107327	+	gi|525582141|gb|EPS28391.1|	-	Pre-rRNA-processing protein ipi1	KOG2149
g28	contig_57	107820	109598	-	gi|425777075|gb|EKV15265.1|	GO:0015205	Allantoin permease	KOG2466
g29	contig_57	109953	110807	-	gi|584415547|emb|CDM27243.1|	-	-	-
g30	contig_57	112321	117403	-	gi|584415545|emb|CDM27241.1|	GO:0019901	Probable cysteine desulfurase	KOG1674
g31	contig_57	117916	118572	-	gi|255951130|ref|XP_002566332.1|	-	-	-
g32	contig_57	119142	122006	-	gi|584415542|emb|CDM27238.1|	-	-	-
g33	contig_57	124007	130754	-	gi|255951120|ref|XP_002566327.1|	GO:0005524	Helicase SEN1	KOG1801
g34	contig_57	131908	136642	-	gi|255951118|ref|XP_002566326.1|	GO:0046872	Phospholipid-transporting ATPase DNF1	KOG0206
g35	contig_57	138878	141197	+	gi|255951116|ref|XP_002566325.1|	-	-	-
g36	contig_57	141497	142297	-	gi|255951114|ref|XP_002566324.1|	GO:0046961	V-type proton ATPase subunit E	KOG1664
g37	contig_57	142537	144485	+	gi|425771577|gb|EKV10015.1|	-	-	-
g38	contig_57	145932	146727	-	gi|584415555|emb|CDM27251.1|	GO:0043565	Transcription factor of morphogenesis MCM1	KOG0015
g39	contig_57	148601	150229	-	gi|255951106|ref|XP_002566320.1|	-	-	-
g40	contig_57	153662	155559	+	gi|576921263|gb|EUC35407.1|	GO:0050661	Putative sterigmatocystin biosynthesis monooxygenase stcW	KOG1399
g41	contig_57	155688	159986	-	gi|584415645|emb|CDM27342.1|	GO:0016787	Uncharacterized protein C11D3.15	KOG1939
g42	contig_57	160303	161835	+	gi|255950916|ref|XP_002566225.1|	-	Uncharacterized transporter C757.13	KOG2533
g43	contig_57	162423	163715	+	gi|584415643|emb|CDM27340.1|	GO:0016491	L-pipecolate oxidase	KOG2820
g44	contig_57	163827	165028	-	gi|255950920|ref|XP_002566227.1|	-	-	-
g45	contig_57	166132	167719	+	gi|255950922|ref|XP_002566228.1|	GO:0016491	Aldehyde dehydrogenase, dimeric NADP-preferring	KOG2456
g46	contig_57	168263	169960	+	gi|584415640|emb|CDM27337.1|	-	-	-
g47	contig_57	170064	170777	-	gi|584415639|emb|CDM27336.1|	-	-	-
g48	contig_57	171256	173103	-	gi|425771558|gb|EKV09997.1|	-	Rab proteins geranylgeranyltransferase component A	KOG1439
g49	contig_57	176894	177491	-	gi|169778787|ref|XP_001823858.1|	GO:0003755	Peptidyl-prolyl cis-trans isomerase-like 1	KOG0881
g50	contig_57	177715	179550	+	gi|425771554|gb|EKV09993.1|	GO:0004190	Probable intramembrane protease C25B8.17	KOG2443
g51	contig_57	179736	180914	-	gi|255950938|ref|XP_002566236.1|	-	Exosome complex component rrp43	KOG1613
g52	contig_57	182291	184516	+	gi|255950940|ref|XP_002566237.1|	GO:0050660	Ferric/cupric reductase transmembrane component 7	KOG0039
g53	contig_57	184742	185788	-	gi|425771551|gb|EKV09990.1|	-	N-alpha-acetyltransferase 50	KOG3138
g54	contig_57	186311	187253	+	gi|584415632|emb|CDM27329.1|	-	-	-
g55	contig_57	188906	190369	+	gi|255950946|ref|XP_002566240.1|	GO:0030528	Uncharacterized protein C1A6.01c	KOG2845
g56	contig_57	192534	195017	+	gi|584415630|emb|CDM27327.1|	GO:0020037	Probable sterigmatocystin biosynthesis P450 monooxygenase stcL	KOG0158
g57	contig_57	195451	197506	-	gi|584415628|emb|CDM27325.1|	-	Putative HC-toxin efflux carrier TOXA	KOG0254
g58	contig_57	198883	200043	+	gi|425771545|gb|EKV09984.1|	-	Putative aryl-alcohol dehydrogenase AAD14	KOG1575
g59	contig_57	200610	202149	-	gi|425771544|gb|EKV09983.1|	GO:0016773	Glucokinase	KOG1369
g60	contig_57	205850	207812	-	gi|255953645|ref|XP_002567575.1|	GO:0016491	3-hydroxybutyryl-CoA dehydrogenase	KOG2304
g61	contig_57	208382	209843	+	gi|255953643|ref|XP_002567574.1|	GO:0020037	NADH-cytochrome b5 reductase 1	KOG0534
g62	contig_57	210534	212317	+	gi|584412113|emb|CDM30878.1|	GO:0020037	Cytochrome P450 4F8	KOG0157
g63	contig_57	213254	214016	+	gi|584415625|emb|CDM27322.1|	-	Probable altered inheritance of mitochondria protein 13, mitochondrial
g64	contig_57	214313	217026	-	gi|255950962|ref|XP_002566248.1|	GO:0004526	Ribonucleases P/MRP protein subunit pop1	KOG3322
g65	contig_57	217240	219353	-	gi|584415623|emb|CDM27320.1|	-	Uncharacterized transporter C3H1.06c
g66	contig_57	220078	221011	-	gi|255950966|ref|XP_002566250.1|	-	Uncharacterized protein C26H8.11c	KOG4781
g67	contig_57	221249	223082	-	gi|255950968|ref|XP_002566251.1|	GO:0005515	Ubiquitin carboxyl-terminal hydrolase 6	KOG1872
g68	contig_57	223431	224198	+	gi|70984667|ref|XP_747840.1|	-	Actin-related protein 2/3 complex subunit 4	KOG1876
g69	contig_57	225996	228529	+	gi|584415619|emb|CDM27316.1|	-	-	-
g70	contig_57	230603	232838	+	gi|584415618|emb|CDM27315.1|	-	-	-
g71	contig_57	236708	238044	+	gi|584415614|emb|CDM27311.1|	GO:0008270	-	-
g72	contig_57	240208	244195	-	gi|255950980|ref|XP_002566257.1|	GO:0005524	Probable serine/threonine-protein kinase HSL1	KOG0588
g73	contig_57	247134	248856	+	gi|317141133|ref|XP_001817379.2|	GO:0050660	Bifunctional solanapyrone synthase
g74	contig_57	249660	250016	+	-	-	-	-
g75	contig_57	250694	251353	-	gi|255950988|ref|XP_002566261.1|	-	-	-
g76	contig_57	252151	253112	+	gi|255950990|ref|XP_002566262.1|	-	Pyrroline-5-carboxylate reductase	KOG3124
g77	contig_57	253203	254358	-	gi|557724488|dbj|GAD96890.1|	GO:0016491	Uncharacterized oxidoreductase C736.13
g78	contig_57	256102	256918	+	gi|302884412|ref|XP_003041102.1|	-	-	-
g79	contig_57	257474	258195	+	gi|255951000|ref|XP_002566267.1|	GO:0016491	Putative peroxiredoxin pmp20	KOG0541
g80	contig_57	258617	262911	-	gi|584415602|emb|CDM27299.1|	-	Uncharacterized RWD, RING finger and WD repeat-containing protein C11E3.05	KOG0309
g81	contig_57	263351	263969	+	gi|525582188|gb|EPS28438.1|	GO:0016881	Ubiquitin-conjugating enzyme E2 36	KOG0417
g82	contig_57	264610	265444	+	gi|225678099|gb|EEH16383.1|	GO:0003735	60S ribosomal protein L24	KOG1722
g83	contig_57	266324	266959	-	gi|584415599|emb|CDM27296.1|	GO:0008080	Glucosamine 6-phosphate N-acetyltransferase	KOG3396
g84	contig_57	267479	269358	-	gi|425771612|gb|EKV10050.1|	GO:0016829	Fumarate hydratase, mitochondrial	KOG1317
g85	contig_57	269587	270792	-	gi|584415597|emb|CDM27294.1|	GO:0016787	AB hydrolase superfamily protein C1039.03	KOG1515
g86	contig_57	271632	272988	+	gi|255951014|ref|XP_002566274.1|	GO:0030170	Aspartate aminotransferase, cytoplasmic	KOG1412
g87	contig_57	273497	274875	-	gi|584415595|emb|CDM27292.1|	-	Cell fusion protein cfr1	KOG1181
g88	contig_57	275196	275705	-	gi|255951018|ref|XP_002566276.1|	-	-	-
g89	contig_57	276326	276939	+	gi|121704030|ref|XP_001270279.1|	GO:0003743	Eukaryotic translation initiation factor 1A	KOG3403
g90	contig_57	277689	279942	-	gi|584415591|emb|CDM27288.1|	GO:0008236	-	-
g91	contig_57	280264	283547	-	gi|255951024|ref|XP_002566279.1|	GO:0004518	DNA repair protein rad16	KOG0442
g92	contig_57	284062	284333	-	gi|255951026|ref|XP_002566280.1|	-	-	-
g93	contig_57	286026	290375	+	gi|255951034|ref|XP_002566284.1|	GO:0046873	Mitochondrial inner membrane magnesium transporter mrs2	KOG2662
g94	contig_57	290612	293888	-	gi|212543469|ref|XP_002151889.1|	GO:0020037	tRNA (uracil-O(2)-)-methyltransferase	KOG0159
g95	contig_57	294210	295119	+	gi|212543467|ref|XP_002151888.1|	GO:0046872	Meiotically up-regulated gene 14 protein	KOG3699
g96	contig_57	295698	299604	+	gi|212543465|ref|XP_002151887.1|	-	General amino acid permease AGP2	KOG1286
g97	contig_57	300109	302344	-	gi|70995430|ref|XP_752470.1|	GO:0022857	Sugar transporter STL1	KOG0254
g98	contig_57	304430	305458	+	gi|255951040|ref|XP_002566287.1|	-	Sedoheptulose 1,7-bisphosphatase	KOG0235
g99	contig_57	305673	306083	-	gi|255951042|ref|XP_002566288.1|	-	High osmolarity sensitivity protein 3
g100	contig_57	306986	309481	-	gi|255951044|ref|XP_002566289.1|	GO:0050661	Meiotically up-regulated gene 72 protein
g101	contig_57	312891	314830	-	gi|425771595|gb|EKV10033.1|	GO:0008026	ATP-dependent RNA helicase sub2	KOG0329
g102	contig_57	315108	315680	+	gi|425771594|gb|EKV10032.1|	-	Ribonuclease P protein subunit rpr2
g103	contig_57	316705	317273	-	gi|584415574|emb|CDM27270.1|	-	-	-
g104	contig_57	318217	319080	+	gi|584415573|emb|CDM27269.1|	-	Protein saf1
g105	contig_57	320023	322318	-	gi|584415572|emb|CDM27268.1|	GO:0005524	G2-specific protein kinase nimA	KOG0591
g106	contig_57	322987	325017	+	gi|255951056|ref|XP_002566295.1|	GO:0005515	BTB/POZ domain-containing protein 3	KOG0511
g107	contig_57	325492	325863	-	gi|255951058|ref|XP_002566296.1|	-	-	-
g108	contig_57	326060	329851	+	gi|255951060|ref|XP_002566297.1|	GO:0005524	Structural maintenance of chromosomes protein 5	KOG0979
g109	contig_57	335946	336848	+	gi|255951068|ref|XP_002566301.1|	-	Zinc finger protein C25B8.19c	KOG1721
g110	contig_57	337381	342258	-	gi|584415564|emb|CDM27260.1|	GO:0016491	Uncharacterized lactate 2-monooxygenase PB1A11.03	KOG2088
g111	contig_57	342938	343846	-	gi|425771583|gb|EKV10021.1|	-	Vegetative incompatibility protein HET-E-1	KOG0295
g112	contig_57	344439	346058	+	gi|584415559|emb|CDM27255.1|	-	Uncharacterized transporter C1002.16c	KOG2533
g113	contig_57	347318	348962	-	gi|238501068|ref|XP_002381768.1|	GO:0020037	Cytochrome P450 52A13	KOG0157
g114	contig_57	349484	351478	+	gi|255951082|ref|XP_002566308.1|	GO:0003824	Squalene--hopene cyclase	KOG0497
g115	contig_57	352946	354133	+	gi|134077166|emb|CAK45507.1|	-	-	-
g116	contig_57	354865	362545	+	gi|115386646|ref|XP_001209864.1|	GO:0042626	Leptomycin B resistance protein pmd1	KOG1382
g117	contig_57	363008	365633	-	gi|425771563|gb|EKV10002.1|	-	Nascent polypeptide-associated complex subunit beta	KOG2240
g118	contig_57	365878	366984	-	gi|255950904|ref|XP_002566219.1|	GO:0016491	Uncharacterized oxidoreductase C736.13	KOG1208
g119	contig_57	367452	368207	+	gi|255950902|ref|XP_002566218.1|	-	UPF0483 protein C25G4.2	KOG2551
g120	contig_57	368489	369506	-	gi|238499497|ref|XP_002380983.1|	GO:0016787	Acyl-protein thioesterase 1	KOG2112
g121	contig_57	369694	372219	-	gi|255950856|ref|XP_002566195.1|	GO:0004026	Uncharacterized protein AFUA_6G02800
g122	contig_57	372897	373519	-	gi|255950860|ref|XP_002566197.1|	GO:0005375	-	-
g123	contig_57	373769	375915	+	gi|584415666|emb|CDM27363.1|	GO:0050660	Ferric/cupric reductase transmembrane component 2	KOG0039
g124	contig_57	376616	377311	+	gi|322702896|gb|EFY94516.1|	-	Ankyrin repeat and KH domain-containing protein CBG24701	KOG4177
g125	contig_57	377487	379129	-	gi|115399991|ref|XP_001215584.1|	GO:0004185	Carboxypeptidase Y	KOG1282
g126	contig_57	379510	381070	-	gi|255953051|ref|XP_002567278.1|	-	-	-
g127	contig_57	382318	383049	+	gi|121716483|ref|XP_001275821.1|	-	-	-
g128	contig_57	384297	385303	-	gi|350639409|gb|EHA27763.1|	-	-	-
g129	contig_57	386591	387195	+	gi|584415665|emb|CDM27362.1|	GO:0016491	Putative redox protein fmp46, mitochondrial
g130	contig_57	387578	389625	-	gi|255950866|ref|XP_002566200.1|	GO:0005524	Serine/threonine-protein kinase sid2	KOG0605
g131	contig_57	390281	390771	-	gi|255950868|ref|XP_002566201.1|	-	-	-
g132	contig_57	393881	394906	+	gi|587659754|gb|EWY82122.1|	-	-	-
g133	contig_57	396044	400190	-	gi|599156112|gb|EYE95273.1|	GO:0008270	Nitrogen assimilation transcription factor nit-4
g134	contig_57	400448	401152	-	gi|255950876|ref|XP_002566205.1|	GO:0005515	Glutathione S-transferase 3	KOG0867
g135	contig_57	403943	405636	+	gi|584410826|emb|CDM34857.1|	-	Gluconolactonase
g136	contig_57	407339	409702	+	gi|584415659|emb|CDM27356.1|	GO:0008270	Sterol uptake control protein 2
g137	contig_57	411387	412234	+	gi|255950878|ref|XP_002566206.1|	-	-	-
g138	contig_57	412438	414548	+	gi|425771462|gb|EKV09904.1|	GO:0003824	Mitochondrial 2-methylisocitrate lyase	KOG1260
g139	contig_57	415043	415789	-	gi|119483528|ref|XP_001261667.1|	-	-	-
g140	contig_57	419516	420010	-	gi|255950884|ref|XP_002566209.1|	-	-	-
g141	contig_57	422537	425608	+	gi|584415656|emb|CDM27353.1|	GO:0016758	Chitin synthase C	KOG2571
g142	contig_57	428071	429542	+	gi|255950890|ref|XP_002566212.1|	-	-	-
g143	contig_57	432403	433863	-	gi|584415654|emb|CDM27351.1|	-	UPF0311 protein YveG
g144	contig_57	435193	437574	-	gi|584415653|emb|CDM27350.1|	GO:0005515	Meiotic recombination protein rec8	KOG1213
g145	contig_57	438487	441280	-	gi|584415652|emb|CDM27349.1|	GO:0051287	Protein arg-6, mitochondrial	KOG2436
g146	contig_57	442623	447611	-	gi|358400335|gb|EHK49666.1|	GO:0042802	Synaptobrevin homolog 1	KOG1840
g147	contig_57	450022	451443	+	gi|557729847|dbj|GAD91614.1|	-	Mannan endo-1,6-alpha-mannosidase DCW1
g148	contig_57	452135	452917	+	gi|350630015|gb|EHA18388.1|	-	-	-
g149	contig_57	453324	453807	-	gi|425771475|gb|EKV09917.1|	-	Assembly factor cbp4
g150	contig_57	454959	459764	+	gi|584415672|emb|CDM27370.1|	GO:0016491	Chitin synthase regulatory factor 3	KOG1550
g151	contig_57	459939	460457	-	gi|425771478|gb|EKV09920.1|	-	NADH-ubiquinone oxidoreductase 10.5 kDa subunit	KOG3446
g152	contig_57	460829	461652	+	gi|255950842|ref|XP_002566188.1|	-	Probable mitochondrial pyruvate carrier 1	KOG1589
g153	contig_57	462448	464175	+	gi|584415676|emb|CDM27374.1|	GO:0004650	Probable exopolygalacturonase X
g154	contig_57	464508	466341	-	gi|317137406|ref|XP_001727704.2|	-	Uncharacterized MFS-type transporter C1271.10c	KOG0255
g155	contig_57	467511	468519	+	gi|238489551|ref|XP_002376013.1|	GO:0016491	15-hydroxyprostaglandin dehydrogenase [NAD(+)]	KOG4169
g156	contig_57	468810	471231	-	gi|584415688|emb|CDM27386.1|	GO:0008270	Regulatory protein MIG2
g157	contig_57	471572	473670	-	gi|115386586|ref|XP_001209834.1|	GO:0050661	Putative sterigmatocystin biosynthesis monooxygenase stcW	KOG1399
g158	contig_57	479139	481322	+	gi|525582273|gb|EPS28523.1|	GO:0004497	Phenol 2-monooxygenase
g159	contig_57	485013	485745	+	gi|425770483|gb|EKV08953.1|	-	-	-
g160	contig_57	486282	487505	-	gi|255711900|ref|XP_002552233.1|	-	Uncharacterized protein C285.05
g161	contig_57	488208	488882	+	gi|169785773|ref|XP_001827347.1|	-	Putative xanthine/uracil permease C887.17
g162	contig_57	491163	494111	+	gi|584415689|emb|CDM27387.1|	-	-	-
g163	contig_57	495541	497535	-	gi|255950796|ref|XP_002566165.1|	GO:0003824	Putative dihydroxy-acid dehydratase, mitochondrial	KOG2448
g164	contig_57	497990	499370	-	gi|255950794|ref|XP_002566164.1|	GO:0016627	Acyl-CoA dehydrogenase fadE12	KOG0141
g165	contig_57	500418	501524	+	gi|255933047|ref|XP_002557994.1|	-	-	-
g166	contig_57	501753	503296	-	gi|13021726|gb|AAK11533.1|	GO:0022857	Probable metabolite transport protein GIT1	KOG0252
g167	contig_57	503976	504739	-	-	-	-	-
g168	contig_57	504877	505521	+	gi|584415708|emb|CDM27406.1|	-	-	-
g169	contig_57	505750	509267	-	gi|302501374|ref|XP_003012679.1|	-	Putative beta-lactamase-like 1
g170	contig_57	510777	512150	+	gi|584415706|emb|CDM27404.1|	GO:0050660	Bifunctional solanapyrone synthase
g171	contig_57	512205	513242	-	gi|584415705|emb|CDM27403.1|	-	Aflatoxin B1 aldehyde reductase member 3	KOG1575
g172	contig_57	513452	514323	-	gi|425771492|gb|EKV09934.1|	-	-	-
g173	contig_57	514638	515932	-	gi|255950780|ref|XP_002566157.1|	-	-	-
g174	contig_57	516263	517212	+	gi|425771494|gb|EKV09936.1|	-	-	-
g175	contig_57	519781	520551	+	gi|255950774|ref|XP_002566154.1|	GO:0004659	-	-
g176	contig_57	521580	522536	+	gi|584415699|emb|CDM27397.1|	GO:0016491	Retinol dehydrogenase 12	KOG1208
g177	contig_57	523173	525611	+	gi|584415697|emb|CDM27395.1|	GO:0003824	HC-toxin synthetase	KOG1178
g178	contig_57	526444	527940	+	gi|358375618|dbj|GAA92198.1|	-	Probable pectine lyase F
g179	contig_57	528543	529526	-	gi|255950768|ref|XP_002566151.1|	-	-	-
g180	contig_57	530481	535005	-	gi|255950766|ref|XP_002566150.1|	GO:0008270	Deoxyribodipyrimidine photo-lyase
g181	contig_57	536001	536993	+	gi|425771503|gb|EKV09945.1|	-	-	-
g182	contig_57	537208	539971	-	gi|584415714|emb|CDM27412.1|	GO:0015299	K(+)/H(+) antiporter 1	KOG1650
g183	contig_57	541177	543208	+	gi|255930793|ref|XP_002556953.1|	-	-	-
g184	contig_57	546018	546539	-	gi|255930791|ref|XP_002556952.1|	GO:0016831	-	-
g185	contig_57	547228	551529	-	gi|425771505|gb|EKV09947.1|	GO:0042626	ABC transporter CDR4	KOG0065
g186	contig_57	553155	553779	+	gi|584415716|emb|CDM27414.1|	-	Zinc-type alcohol dehydrogenase-like protein C1198.01	KOG0024
g187	contig_57	554154	555330	+	gi|255950756|ref|XP_002566145.1|	GO:0003824	Putative branched-chain-amino-acid aminotransferase TOXF	KOG0975
g188	contig_57	555574	558729	-	gi|425771342|gb|EKV09787.1|	-	-	-
g189	contig_57	559397	562810	-	gi|255950750|ref|XP_002566142.1|	GO:0016891	Serine/threonine-protein kinase ppk4	KOG1027
g190	contig_57	563833	565316	-	gi|425771344|gb|EKV09789.1|	-	Mannan endo-1,6-alpha-mannosidase DCW1
g191	contig_57	566274	568059	-	gi|525583269|gb|EPS29519.1|	GO:0005524	Probable T-complex protein 1 subunit beta	KOG0363
g192	contig_57	568284	570293	+	gi|584415721|emb|CDM27419.1|	GO:0003755	Peptidyl-prolyl cis-trans isomerase cyp15	KOG0882
g193	contig_57	570730	571612	-	gi|425771348|gb|EKV09793.1|	-	-	-
g194	contig_57	575825	576275	-	gi|594716318|gb|EXU99222.1|	-	-	-
g195	contig_57	577162	578809	+	gi|599153670|gb|EYE92959.1|	GO:0008270	-	-
g196	contig_57	579828	580682	+	gi|255945655|ref|XP_002563595.1|	-	-	-
g197	contig_57	581800	582961	-	gi|584417385|emb|CDM29095.1|	-	-	-
g198	contig_57	583471	585227	+	gi|584417386|emb|CDM29096.1|	-	-	-
g199	contig_57	586231	587037	-	gi|425769527|gb|EKV08019.1|	-	-	-
g200	contig_57	590069	591669	-	gi|255945657|ref|XP_002563596.1|	-	Uncharacterized transporter C530.02	KOG0255
g201	contig_57	594532	595372	-	gi|255945985|ref|XP_002563760.1|	GO:0016788	-	-
g202	contig_57	598374	600557	-	gi|452986676|gb|EME86432.1|	GO:0004565	Beta-galactosidase
g203	contig_57	602354	602874	-	gi|145258289|ref|XP_001401997.1|	-	-	-
g204	contig_57	607733	608404	+	gi|67515465|ref|XP_657618.1|	-	-	-
g205	contig_57	609193	609821	-	gi|238497189|ref|XP_002379830.1|	GO:0003796	Lysozyme
g206	contig_57	616477	617732	+	gi|255931475|ref|XP_002557294.1|	-	Protein GCY	KOG1577
g207	contig_57	618240	620269	-	gi|119474365|ref|XP_001259058.1|	GO:0050661	Flavin-containing monooxygenase YUCCA4	KOG1399
g208	contig_57	621685	622931	-	gi|255931479|ref|XP_002557296.1|	GO:0016491	Uncharacterized oxidoreductase YisS	KOG2742
g209	contig_57	623679	625919	-	gi|358369227|dbj|GAA85842.1|	-	-	-
g210	contig_57	626422	627966	+	gi|599160847|gb|EYE99797.1|	GO:0020037	Benzoate 4-monooxygenase	KOG0157
g211	contig_57	628948	629805	-	gi|471575078|gb|EMR72733.1|	-	Epoxide hydrolase 3
g212	contig_57	631642	632058	-	gi|407929761|gb|EKG22571.1|	-	-	-
g213	contig_57	632772	633957	+	gi|358367724|dbj|GAA84342.1|	-	NmrA-like family domain-containing protein 1
g214	contig_57	635917	637173	-	gi|255953721|ref|XP_002567613.1|	GO:0046983	-	-
g215	contig_57	638853	639515	+	gi|425771349|gb|EKV09794.1|	-	-	-
g216	contig_57	639612	641495	-	gi|255950738|ref|XP_002566136.1|	-	Uncharacterized transporter C1002.16c	KOG2533
g217	contig_57	642413	645099	-	gi|584415727|emb|CDM27425.1|	GO:0008270	Transcriptional regulatory protein moc3
g218	contig_57	645777	646834	+	gi|584415726|emb|CDM27424.1|	-	UPF0641 membrane protein PJ4664.05	KOG3989
g219	contig_57	647412	648234	+	gi|425771353|gb|EKV09798.1|	-	Presequence translocated-associated motor subunit pam17, mitochondrial
g220	contig_57	648593	649718	-	gi|255950732|ref|XP_002566133.1|	GO:0003824	3-hydroxypropionyl-coenzyme A dehydratase	KOG0016
g221	contig_57	650232	653754	-	gi|599150405|gb|EYE89973.1|	-	Probable fatty acid methyltransferase
g222	contig_57	654225	655791	+	gi|238508322|ref|XP_002385357.1|	-	Probable flavin-containing monoamine oxidase A	KOG0029
g223	contig_57	656661	657304	+	gi|255950726|ref|XP_002566130.1|	-	-	-
g224	contig_57	657849	658778	-	gi|255950724|ref|XP_002566129.1|	-	Sterol regulatory element-binding protein ECM22
g225	contig_57	661799	664993	-	gi|238505398|ref|XP_002383928.1|	-	-	-
g226	contig_57	668482	670344	-	gi|240277035|gb|EER40545.1|	GO:0016491	Iron transport multicopper oxidase FET3	KOG1263
g227	contig_57	671079	672266	+	gi|240277036|gb|EER40546.1|	-	Plasma membrane iron permease
g228	contig_57	673797	676529	+	gi|169778508|ref|XP_001823719.1|	GO:0050660	Probable ferric reductase transmembrane component	KOG0039
g229	contig_57	677092	679206	-	gi|525583313|gb|EPS29563.1|	-	-	-
g230	contig_57	682696	683876	+	gi|584415734|emb|CDM27432.1|	-	-	-
g231	contig_57	686185	686751	+	gi|255950714|ref|XP_002566124.1|	-	-	-
g232	contig_57	687550	689202	-	gi|255950712|ref|XP_002566123.1|	-	Ribosome assembly protein 4	KOG0271
g233	contig_57	689298	692205	+	gi|584415737|emb|CDM27435.1|	GO:0030983	MutS protein homolog 4	KOG0220
g234	contig_57	692706	695173	-	gi|584415738|emb|CDM27436.1|	-	LIM domain and RING finger protein C1223.01	KOG2231
g235	contig_57	695846	696959	-	gi|584415739|emb|CDM27437.1|	GO:0005515	Protein TRI1	KOG1946
g236	contig_57	697460	699853	+	gi|425771363|gb|EKV09808.1|	GO:0003676	Eukaryotic translation initiation factor 3 subunit B	KOG2314
g237	contig_57	700133	701154	-	gi|425776981|gb|EKV15178.1|	-	Cell wall protein PRY3	KOG3017
g238	contig_57	701844	704616	-	gi|255950700|ref|XP_002566117.1|	-	F-box protein pof6	KOG3745
g239	contig_57	705734	707022	+	gi|255950698|ref|XP_002566116.1|	GO:0020037	Cytochrome c1, heme protein, mitochondrial	KOG3052
g240	contig_57	707475	708749	-	gi|425771367|gb|EKV09812.1|	-	-	-
g241	contig_57	709357	711764	+	gi|584415745|emb|CDM27443.1|	-	-	-
g242	contig_57	712072	713349	+	gi|255950692|ref|XP_002566113.1|	-	Phospho-2-dehydro-3-deoxyheptonate aldolase, phenylalanine-inhibited
g243	contig_57	714344	716632	-	gi|255950688|ref|XP_002566111.1|	-	-	-
g244	contig_57	718613	726605	-	gi|255950680|ref|XP_002566107.1|	GO:0004135	Glycogen debranching enzyme	KOG3625
g245	contig_57	728246	729254	+	gi|599152017|gb|EYE91422.1|	-	-	-
g246	contig_57	729652	731837	+	gi|599152016|gb|EYE91421.1|	GO:0016491	Uncharacterized oxidoreductase C162.03	KOG1205
g247	contig_57	733075	734259	+	gi|599152015|gb|EYE91420.1|	GO:0016491	S-(hydroxymethyl)glutathione dehydrogenase	KOG0024
g248	contig_57	735317	737180	-	gi|425771375|gb|EKV09820.1|	GO:0005524	Mitochondrial clpX-like chaperone MCX1	KOG0745
g249	contig_57	738012	739625	+	gi|525583340|gb|EPS29590.1|	GO:0050660	6-hydroxy-D-nicotine oxidase
g250	contig_57	740303	740782	-	gi|255950676|ref|XP_002566105.1|	-	-	-
g251	contig_57	741354	742703	+	gi|584415751|emb|CDM27449.1|	GO:0051287	Glycerol-3-phosphate dehydrogenase [NAD(+)]	KOG2711
g252	contig_57	743488	744530	+	gi|67522701|ref|XP_659411.1|	-	-	-
g253	contig_57	745227	748541	-	gi|584415754|emb|CDM27452.1|	-	-	-
g254	contig_57	749385	750279	+	gi|255950668|ref|XP_002566101.1|	-	Ras-related protein Rab-11B	KOG0087
g255	contig_57	751039	752127	-	gi|255950666|ref|XP_002566100.1|	-	-	-
g256	contig_57	752787	753925	-	gi|584415756|emb|CDM27454.1|	-	Ribosome biogenesis protein BRX1	KOG2971
g257	contig_57	754406	755660	-	gi|255950662|ref|XP_002566098.1|	-	Ketohexokinase	KOG2947
g258	contig_57	757054	758744	+	gi|584415758|emb|CDM27456.1|	-	-	-
g259	contig_57	761022	763119	-	gi|255950658|ref|XP_002566096.1|	-	ARS-binding protein 2
g260	contig_57	764389	766401	+	gi|255950656|ref|XP_002566095.1|	-	-	-
g261	contig_57	766863	768468	+	gi|584415765|emb|CDM27463.1|	-	-	-
g262	contig_57	769068	769750	+	gi|255950652|ref|XP_002566093.1|	-	-	-
g263	contig_57	771004	772107	+	gi|584415767|emb|CDM27465.1|	-	-	-
g264	contig_57	773068	773635	-	gi|584415768|emb|CDM27466.1|	-	-	-
g265	contig_57	774415	775529	+	-	-	-	-
g266	contig_57	776349	780736	-	gi|255934132|ref|XP_002558347.1|	-	Alkaline phosphatase D
g267	contig_57	784193	785092	+	gi|255939191|ref|XP_002560365.1|	-	-	-
g268	contig_57	785742	787819	-	gi|584415770|emb|CDM27468.1|	GO:0008270	-	-
g269	contig_57	789662	791437	+	gi|255950638|ref|XP_002566086.1|	-	Uncharacterized transporter C1529.01	KOG0255
g270	contig_57	792736	793847	-	gi|584415772|emb|CDM27470.1|	GO:0003824	Fumarylacetoacetate hydrolase domain-containing protein 2	KOG1535
g271	contig_57	794059	794529	+	gi|584415773|emb|CDM27471.1|	-	-	-
g272	contig_57	794764	796188	-	gi|255950628|ref|XP_002566081.1|	GO:0004301	Putative epoxide hydrolase	KOG2565
g273	contig_57	796707	797882	+	gi|255950626|ref|XP_002566080.1|	-	Abhydrolase domain-containing protein C22H12.03	KOG2382
g274	contig_57	798220	801747	-	gi|584415777|emb|CDM27475.1|	-	-	-
g275	contig_57	802285	803797	+	gi|255950622|ref|XP_002566078.1|	GO:0005524	RuvB-like helicase 2	KOG2680
g276	contig_57	804053	805396	-	gi|584415779|emb|CDM27477.1|	GO:0005515	LIN1-like protein	KOG2950
g277	contig_57	805584	808478	+	gi|525583371|gb|EPS29621.1|	-	Ubiquitin fusion degradation protein 1	KOG1816
g278	contig_57	809014	811075	+	gi|425771290|gb|EKV09737.1|	-	-	-
g279	contig_57	811434	815187	-	gi|584415783|emb|CDM27481.1|	GO:0003899	DNA-directed RNA polymerase III subunit RPC2	KOG0215
g280	contig_57	816875	817742	+	gi|615430658|ref|XP_007589672.1|	GO:0016810	Aliphatic nitrilase	KOG0805
g281	contig_57	820677	825217	+	gi|584415784|emb|CDM27482.1|	GO:0003723	Pumilio domain-containing protein C6G9.14	KOG2049
g282	contig_57	826194	827964	+	gi|584415785|emb|CDM27483.1|	-	Origin recognition complex subunit 5	KOG2543
g283	contig_57	828493	830594	-	gi|425771286|gb|EKV09733.1|	-	-	-
g284	contig_57	831812	834875	+	gi|425771285|gb|EKV09732.1|	GO:0046872	Plasma membrane ATPase	KOG0205
g285	contig_57	835473	836528	-	gi|255950600|ref|XP_002566067.1|	-	-	-
g286	contig_57	838009	838643	-	gi|70986298|ref|XP_748643.1|	-	Riboflavin transporter MCH5	KOG2504
g287	contig_57	840398	844542	-	gi|584415793|emb|CDM27491.1|	GO:0005515	Uncharacterized calcium-binding protein C800.10c	KOG0998
g288	contig_57	845947	847668	-	gi|255950588|ref|XP_002566061.1|	GO:0005525	Tubulin alpha-1 chain	KOG1376
g289	contig_57	848370	849252	+	gi|255950586|ref|XP_002566060.1|	-	-	-
g290	contig_57	849895	852795	-	gi|425771221|gb|EKV09670.1|	GO:0005524	Aspartate--tRNA ligase, cytoplasmic	KOG0556
g291	contig_57	853263	854291	+	gi|255950582|ref|XP_002566058.1|	GO:0016787	AB hydrolase superfamily protein C1039.03	KOG1515
g292	contig_57	856363	858254	+	gi|115449763|ref|XP_001218689.1|	GO:0004411	Homogentisate 1,2-dioxygenase	KOG1417
g293	contig_57	859140	860685	+	gi|590047887|gb|EXK49745.1|	GO:0050660	Mitomycin radical oxidase
g294	contig_57	861631	863535	-	gi|255956899|ref|XP_002569202.1|	GO:0020037	Pisatin demethylase	KOG0158
g295	contig_57	863997	865303	-	gi|212528328|ref|XP_002144321.1|	GO:0004497	3-(3-hydroxy-phenyl)propionate/3-hydroxycinnamic acid hydroxylase
g296	contig_57	865985	868902	-	gi|212528318|ref|XP_002144316.1|	-	-	-
g297	contig_57	871705	872893	+	gi|212528326|ref|XP_002144320.1|	GO:0004616	3-hydroxyisobutyrate dehydrogenase, mitochondrial	KOG0409
g298	contig_57	875485	875835	+	gi|525585530|gb|EPS31780.1|	-	UPF0135 protein BH1380
g299	contig_57	877950	880041	+	gi|565940237|gb|ETI29343.1|	GO:0015205	Uncharacterized permease C1683.05	KOG2466
g300	contig_57	880931	882436	-	gi|327348320|gb|EGE77177.1|	GO:0003824	-	-
g301	contig_57	883251	885150	-	gi|358371398|dbj|GAA88006.1|	GO:0020037	O-methylsterigmatocystin oxidoreductase	KOG0156
g302	contig_57	885792	886792	-	gi|212528320|ref|XP_002144317.1|	-	-	-
g303	contig_57	887533	889635	-	gi|255956907|ref|XP_002569206.1|	GO:0050660	Vanillyl-alcohol oxidase
g304	contig_57	889925	890755	+	gi|255956905|ref|XP_002569205.1|	GO:0016491	15-hydroxyprostaglandin dehydrogenase [NAD(+)]	KOG4169
g305	contig_57	892112	893749	+	gi|302915276|ref|XP_003051449.1|	-	Uncharacterized MFS-type transporter C1271.10c	KOG0255
g306	contig_57	895496	896511	+	gi|255956911|ref|XP_002569208.1|	GO:0004616	3-hydroxyisobutyrate dehydrogenase, mitochondrial	KOG0409
g307	contig_57	896693	897613	-	gi|255956913|ref|XP_002569209.1|	GO:0016787	N-acyl homoserine lactonase AttM
g308	contig_57	898220	899095	+	gi|255956915|ref|XP_002569210.1|	-	3-oxoadipate enol-lactonase 1	KOG4178
g309	contig_57	900318	902162	-	gi|255956921|ref|XP_002569213.1|	-	Para-nitrobenzyl esterase	KOG4389
g310	contig_57	905432	906802	+	gi|119466995|ref|XP_001257304.1|	GO:0004806	Lipase 10
g311	contig_57	908780	909874	-	gi|317138813|ref|XP_003189088.1|	-	Isoflavone reductase-like protein
g312	contig_57	910801	912072	+	gi|119473983|ref|XP_001258867.1|	GO:0008270	Uncharacterized transcriptional regulatory protein C11D3.07c
g313	contig_57	913113	914360	-	gi|119485797|ref|XP_001262241.1|	GO:0004497	Uncharacterized protein Rv1260/MT1298
g314	contig_57	914993	916666	-	gi|584411651|emb|CDM30415.1|	GO:0008270	-	-
g315	contig_57	917473	918210	+	gi|615447723|ref|XP_007593767.1|	GO:0016491	4,5-DOPA dioxygenase extradiol
g316	contig_57	919421	920467	-	gi|584416977|emb|CDM28687.1|	-	2-hydroxy-6-oxo-6-phenylhexa-2,4-dienoate hydrolase
g317	contig_57	921400	922802	+	gi|584416978|emb|CDM28688.1|	-	-	-
g318	contig_57	924906	926990	-	gi|584415805|emb|CDM27503.1|	-	RNA polymerase I-specific transcription initiation factor rrn3	KOG2434
g319	contig_57	927900	928667	-	gi|255950564|ref|XP_002566049.1|	-	-	-
g320	contig_57	933581	935496	+	gi|317144219|ref|XP_001819979.2|	-	Para-nitrobenzyl esterase	KOG1515
g321	contig_57	935724	937844	+	gi|584415809|emb|CDM27507.1|	GO:0008270	Uncharacterized transcriptional regulatory protein C530.05
g322	contig_57	937907	938845	-	gi|255950556|ref|XP_002566045.1|	GO:0016301	Uncharacterized kinase mug58	KOG2878
g323	contig_57	939311	940522	+	gi|584415810|emb|CDM27508.1|	-	Probable tartrate dehydrogenase/decarboxylase TtuC'	KOG0785
g324	contig_57	943432	944738	+	gi|525583388|gb|EPS29638.1|	GO:0016620	Glyceraldehyde-3-phosphate dehydrogenase 1	KOG0657
g325	contig_57	946486	948147	-	gi|425781105|gb|EKV19087.1|	-	Uncharacterized WD repeat-containing protein C17D11.16	KOG0270
g326	contig_57	948392	948767	+	gi|119497251|ref|XP_001265386.1|	-	COX assembly mitochondrial protein 1
g327	contig_57	949158	950270	-	gi|584412956|emb|CDM31726.1|	-	rRNA-processing protein utp23	KOG3164
g328	contig_57	951138	952376	-	gi|255939063|ref|XP_002560301.1|	-	Protein phosphatase PTC7 homolog	KOG1379
g329	contig_57	956055	960778	-	gi|584412961|emb|CDM31731.1|	-	Actin-related protein 2/3 complex subunit 2	KOG2826
g330	contig_57	960948	963939	+	gi|255939075|ref|XP_002560307.1|	-	Uncharacterized WD repeat-containing protein C3D6.12	KOG0306
g331	contig_57	964865	966225	-	gi|255939077|ref|XP_002560308.1|	-	DNA damage response protein WSS1	KOG1558
g332	contig_57	966943	968493	+	gi|255939079|ref|XP_002560309.1|	-	UPF0744 protein C106.03
g333	contig_57	968821	969879	-	gi|255939081|ref|XP_002560310.1|	-	-	-
g334	contig_57	971814	974094	+	gi|255939085|ref|XP_002560312.1|	-	Protein DSF2
g335	contig_57	975569	976877	+	gi|584412967|emb|CDM31737.1|	-	-	-
g336	contig_57	977677	979629	-	gi|115400443|ref|XP_001215810.1|	GO:0030976	Benzaldehyde lyase	KOG1185
g337	contig_57	979919	980847	-	gi|255939091|ref|XP_002560315.1|	GO:0016491	3-oxoacyl-[acyl-carrier-protein] reductase FabG	KOG1199
g338	contig_57	981189	982215	-	gi|255951236|ref|XP_002566385.1|	-	-	-
g339	contig_57	984167	985521	-	gi|350635333|gb|EHA23694.1|	GO:0004497	Salicylate hydroxylase	KOG2614
g340	contig_57	986268	987902	-	gi|255939097|ref|XP_002560318.1|	-	-	-
g341	contig_57	989195	991605	-	gi|584412985|emb|CDM31755.1|	-	DNA polymerase alpha-associated DNA helicase A	KOG1803
g342	contig_57	992207	993556	-	gi|425781088|gb|EKV19070.1|	GO:0003677	Endonuclease III homolog	KOG1921
g343	contig_57	993767	994398	+	gi|525583411|gb|EPS29661.1|	GO:0016881	Ubiquitin-conjugating enzyme E2 pex4	KOG0417
g344	contig_57	994897	995790	-	gi|255939107|ref|XP_002560323.1|	-	-	-
g345	contig_57	996446	999663	-	gi|255939109|ref|XP_002560324.1|	GO:0016491	Polyphenol oxidase B, chloroplastic
g346	contig_57	999867	1000652	+	gi|255939113|ref|XP_002560326.1|	GO:0016491	Uncharacterized protein C5orf4 homolog	KOG0873
g347	contig_57	1001120	1003275	+	gi|115401158|ref|XP_001216167.1|	GO:0005215	Urea active transporter	KOG2348
g348	contig_57	1004204	1005580	+	gi|255939117|ref|XP_002560328.1|	-	1,3-beta-glucanosyltransferase gel1
g349	contig_57	1006746	1011048	-	gi|425781081|gb|EKV19063.1|	-	-	-
g350	contig_57	1011339	1012355	-	gi|255946854|ref|XP_002564194.1|	-	Killer toxin subunits alpha/beta	KOG2806
g351	contig_57	1013761	1016045	+	gi|317037804|ref|XP_001402404.2|	GO:0008270	Uncharacterized transcriptional regulatory protein C139.03
g352	contig_57	1016226	1017282	-	gi|145256057|ref|XP_001402411.1|	GO:0016491	Retinol dehydrogenase 14	KOG1208
g353	contig_57	1017797	1019095	+	gi|425768324|gb|EKV06850.1|	GO:0016491	Zinc-binding alcohol dehydrogenase domain-containing protein cipB	KOG1198
g354	contig_57	1024107	1025843	-	gi|255940710|ref|XP_002561124.1|	-	-	-
g355	contig_57	1026847	1027189	+	gi|584413006|emb|CDM31776.1|	-	-	-
g356	contig_57	1028483	1030561	-	gi|119499225|ref|XP_001266370.1|	GO:0016887	ATP-binding cassette sub-family G member 2	KOG0061
g357	contig_57	1034296	1035911	+	gi|317150935|ref|XP_001824159.2|	-	Alpha-D-glucose-1-phosphate phosphatase YihX
g358	contig_57	1036396	1037508	+	gi|242790965|ref|XP_002481664.1|	-	-	-
g359	contig_57	1037999	1038828	-	gi|255944691|ref|XP_002563113.1|	-	Uncharacterized hydrolase C22A12.06c
g360	contig_57	1040571	1041485	-	gi|525580498|gb|EPS26748.1|	GO:0016758	Uncharacterized alpha-1,2-galactosyltransferase C1289.13c	KOG4748
g361	contig_57	1042146	1042691	+	-	-	-	-
g362	contig_57	1043958	1045004	+	gi|255944689|ref|XP_002563112.1|	GO:0016491	Protein TOXD	KOG1198
g363	contig_57	1046506	1049888	-	gi|255944687|ref|XP_002563111.1|	GO:0046872	Calcium-transporting ATPase 3	KOG0202
g364	contig_57	1050869	1051667	+	gi|255944685|ref|XP_002563110.1|	-	Exosome complex component RRP46	KOG1069
g365	contig_57	1052469	1054298	+	gi|255944683|ref|XP_002563109.1|	GO:0003951	NAD(+) kinase	KOG2178
g366	contig_57	1056152	1057960	+	gi|525583440|gb|EPS29690.1|	-	Choline transport protein	KOG1289
g367	contig_57	1059863	1061599	+	gi|425765596|gb|EKV04267.1|	GO:0005515	Free methionine-R-sulfoxide reductase
g368	contig_57	1062936	1067199	-	gi|317156389|ref|XP_001825709.2|	-	Vegetative incompatibility protein HET-E-1
g369	contig_57	1069102	1070734	+	gi|83772575|dbj|BAE62703.1|	GO:0016846	-	-
g370	contig_57	1070869	1071746	-	gi|255944673|ref|XP_002563104.1|	GO:0016491	Uncharacterized oxidoreductase YxjF	KOG0725
g371	contig_57	1072796	1074017	-	gi|425765504|gb|EKV04181.1|	-	Mannan polymerase complexes subunit MNN9
g372	contig_57	1074566	1075922	-	gi|255944639|ref|XP_002563087.1|	-	Mitochondrial substrate carrier family protein L	KOG0758
g373	contig_57	1076805	1083508	-	gi|255944645|ref|XP_002563090.1|	GO:0046873	Histidine-rich membrane protein KE4 homolog 1	KOG2693
g374	contig_57	1083710	1084469	+	gi|425765502|gb|EKV04179.1|	-	Nucleolar protein 16	KOG4771
g375	contig_57	1084686	1086411	-	gi|255944649|ref|XP_002563092.1|	-	Peroxisomal membrane protein PEX29
g376	contig_57	1086982	1091404	+	gi|255944651|ref|XP_002563093.1|	GO:0005524	Dual specificity protein kinase pom1	KOG0667
g377	contig_57	1092047	1093408	+	gi|425765498|gb|EKV04175.1|	-	Endoplasmic reticulum-Golgi intermediate compartment protein 2	KOG2667
g378	contig_57	1093730	1099107	-	gi|255944655|ref|XP_002563095.1|	-	AP-1 complex subunit sigma-1
g379	contig_57	1100155	1100789	-	gi|255944661|ref|XP_002563098.1|	-	Non-classical export protein 2
g380	contig_57	1102909	1103154	+	gi|83772317|dbj|BAE62447.1|	-	-	-
g381	contig_57	1103859	1104707	-	gi|425765601|gb|EKV04272.1|	-	-	-
g382	contig_57	1109928	1110497	-	gi|255956171|ref|XP_002568838.1|	-	-	-
g383	contig_57	1111329	1112135	-	gi|255956173|ref|XP_002568839.1|	-	Protein ups1 homolog	KOG3337
g384	contig_57	1112823	1115269	-	gi|557722336|dbj|GAD98862.1|	GO:0022857	Polyol transporter 5	KOG0254
g385	contig_57	1117715	1119414	+	gi|255931035|ref|XP_002557074.1|	GO:0008270	Uncharacterized transcriptional regulatory protein C1327.01c
g386	contig_57	1119917	1121446	+	gi|255931037|ref|XP_002557075.1|	GO:0008484	Arylsulfatase	KOG3867
g387	contig_57	1123114	1124840	+	gi|255935219|ref|XP_002558636.1|	GO:0022857	Myo-inositol transporter 1	KOG0254
g388	contig_57	1125287	1127051	+	gi|391870865|gb|EIT80035.1|	-	-	-
g389	contig_57	1127926	1131800	+	gi|599160846|gb|EYE99796.1|	-	-	-
g390	contig_57	1132203	1133566	+	gi|584413363|emb|CDM32134.1|	GO:0005524	Tryptophan--tRNA ligase, cytoplasmic	KOG2145
g391	contig_57	1133704	1134474	-	gi|425765508|gb|EKV04185.1|	GO:0003824	Aminodeoxychorismate lyase
g392	contig_57	1134835	1136915	+	gi|425765509|gb|EKV04186.1|	-	Mitochondrial import receptor subunit tom-70	KOG0547
g393	contig_57	1138375	1141153	+	gi|584413360|emb|CDM32131.1|	GO:0005515	Uncharacterized protein C3H7.13	KOG3872
g394	contig_57	1147233	1149000	-	gi|317028594|ref|XP_001390355.2|	-	Uncharacterized MFS-type transporter C1271.10c	KOG0255
g395	contig_57	1149575	1151708	+	gi|317149653|ref|XP_003190342.1|	GO:0004497	3-hydroxybenzoate 6-hydroxylase	KOG2614
g396	contig_57	1151831	1154402	-	gi|525583821|gb|EPS30071.1|	GO:0008270	Regulatory protein GAL4
g397	contig_57	1154733	1155830	-	gi|525583822|gb|EPS30072.1|	-	Quercetin 2,3-dioxygenase
g398	contig_57	1156536	1157904	+	gi|255944609|ref|XP_002563072.1|	-	-	-
g399	contig_57	1158458	1159377	-	gi|525583824|gb|EPS30074.1|	-	-	-
g400	contig_57	1160229	1164223	-	gi|255944605|ref|XP_002563070.1|	GO:0003676	Uncharacterized RNA-binding protein C1861.04c	KOG0128
g401	contig_57	1164990	1166025	+	gi|584413349|emb|CDM32120.1|	GO:0003735	54S ribosomal protein L22, mitochondrial	KOG1711
g402	contig_57	1166264	1169959	-	gi|255944599|ref|XP_002563067.1|	-	Probable phosphomutase PMU1
g403	contig_57	1171436	1173928	+	gi|425765521|gb|EKV04198.1|	GO:0005524	Carbon catabolite-derepressing protein kinase	KOG0583
g404	contig_57	1174815	1177535	-	gi|425765522|gb|EKV04199.1|	-	-	-
g405	contig_57	1179015	1181674	-	gi|525580818|gb|EPS27068.1|	GO:0005515	Ingression protein fic1
g406	contig_57	1183237	1184868	+	gi|425765525|gb|EKV04202.1|	-	U3 small nucleolar RNA-associated protein 15	KOG0310
g407	contig_57	1185049	1185993	-	gi|255944573|ref|XP_002563054.1|	-	Phytanoyl-CoA dioxygenase domain-containing protein 1	KOG3290
g408	contig_57	1186553	1187182	+	gi|425765527|gb|EKV04204.1|	-	-	-
g409	contig_57	1187495	1188814	-	gi|584413338|emb|CDM32109.1|	GO:0005215	Molybdate transporter 1
g410	contig_57	1189412	1190341	+	gi|587682340|gb|EWZ28945.1|	GO:0016491	-	-
g411	contig_57	1191295	1195847	+	gi|255944563|ref|XP_002563049.1|	GO:0042626	ABC transporter CDR4	KOG0065
g412	contig_57	1198210	1199247	-	gi|391870845|gb|EIT80015.1|	GO:0016787	Probable carboxylesterase 120
g413	contig_57	1201779	1202602	+	gi|255944559|ref|XP_002563047.1|	-	Transmembrane protein 234 homolog
g414	contig_57	1203308	1206460	-	gi|255944557|ref|XP_002563046.1|	GO:0004100	Chitin synthase C	KOG2571
g415	contig_57	1207369	1208041	+	gi|584413331|emb|CDM32102.1|	-	Low molecular weight phosphotyrosine protein phosphatase	KOG3217
g416	contig_57	1208312	1209001	-	gi|255944553|ref|XP_002563044.1|	-	Catabolite repression protein CAT5	KOG4061
g417	contig_57	1209460	1211445	+	gi|425765536|gb|EKV04213.1|	GO:0003677	RNA polymerase-associated protein RTF1	KOG2402
g418	contig_57	1212103	1216078	+	gi|255944549|ref|XP_002563042.1|	-	Mediator of replication checkpoint protein 1
g419	contig_57	1217550	1218521	-	gi|255944545|ref|XP_002563040.1|	-	Uncharacterized protein YMR130W	KOG3085
g420	contig_57	1220445	1223184	+	gi|255944543|ref|XP_002563039.1|	GO:0050660	Cellobiose dehydrogenase	KOG1238
g421	contig_57	1224100	1225020	+	gi|584413322|emb|CDM32093.1|	-	-	-
g422	contig_57	1225343	1226962	-	gi|584413321|emb|CDM32092.1|	-	Uncharacterized protein YOR389W
g423	contig_57	1228699	1229785	+	gi|584415801|emb|CDM27499.1|	GO:0016757	Uncharacterized protein R707	KOG1950
g424	contig_57	1230868	1232258	+	gi|255944525|ref|XP_002563030.1|	GO:0004497	3-hydroxybenzoate 6-hydroxylase 1
g425	contig_57	1232773	1234232	+	gi|584413311|emb|CDM32081.1|	-	-	-
g426	contig_57	1234691	1236685	-	gi|590048833|gb|EXK76357.1|	GO:0020037	Isotrichodermin C-15 hydroxylase	KOG0158
g427	contig_57	1238022	1239768	-	gi|587732871|gb|EXA30587.1|	-	N-substituted formamide deformylase
g428	contig_57	1240816	1243072	+	gi|391866510|gb|EIT75782.1|	GO:0004497	Phenol 2-monooxygenase	KOG3855
g429	contig_57	1243887	1246549	-	gi|425765460|gb|EKV04141.1|	GO:0005515	Suppressor of glycerol defect protein 1	KOG2141
g430	contig_57	1246801	1247312	+	gi|584413309|emb|CDM32079.1|	GO:0030942	Signal recognition particle subunit srp14
g431	contig_57	1248003	1250063	-	gi|255944515|ref|XP_002563025.1|	-	-	-
g432	contig_57	1250351	1251814	+	gi|255944513|ref|XP_002563024.1|	-	-	-
g433	contig_57	1252225	1253690	+	gi|255944511|ref|XP_002563023.1|	GO:0016811	Putative formamidase C869.04
g434	contig_57	1253780	1255166	-	gi|255954523|ref|XP_002568014.1|	GO:0016491	L-saccharopine oxidase	KOG2820
g435	contig_57	1255704	1257714	+	gi|255954525|ref|XP_002568015.1|	-	Uncharacterized MFS-type transporter C1271.10c	KOG0255
g436	contig_57	1258005	1259350	-	gi|255944509|ref|XP_002563022.1|	GO:0003755	Peptidyl-prolyl cis-trans isomerase D	KOG0546
g437	contig_57	1259582	1260386	-	gi|584413304|emb|CDM32074.1|	GO:0016788	D-tyrosyl-tRNA(Tyr) deacylase	KOG3323
g438	contig_57	1260872	1262797	+	gi|255944505|ref|XP_002563020.1|	GO:0030528	General negative regulator of transcription subunit 3	KOG2150
g439	contig_57	1264307	1265037	+	gi|584413302|emb|CDM32072.1|	GO:0008270	-	-
g440	contig_57	1268052	1271307	-	gi|115390338|ref|XP_001212674.1|	GO:0005515	Serine/threonine-protein phosphatase 6 regulatory ankyrin repeat subunit A	KOG0504
g441	contig_57	1271965	1273885	-	gi|584413292|emb|CDM32062.1|	GO:0022857	Sugar transporter STL1	KOG0254
g442	contig_57	1275562	1277143	+	gi|584413291|emb|CDM32061.1|	-	Quinidine resistance protein 2	KOG0255
g443	contig_57	1278357	1280146	+	gi|525580511|gb|EPS26761.1|	GO:0050660	Dihydrolipoyl dehydrogenase, mitochondrial	KOG1335
g444	contig_57	1283885	1285244	-	gi|317031150|ref|XP_001392935.2|	-	NmrA-like family domain-containing protein 1
g445	contig_57	1288659	1289842	+	gi|358400509|gb|EHK49835.1|	GO:0016811	Alkaline ceramidase 3	KOG2329
g446	contig_57	1290739	1292439	+	gi|255948896|ref|XP_002565215.1|	-	-	-
g447	contig_57	1293569	1295058	-	gi|358375979|dbj|GAA92552.1|	GO:0004553	Probable endo-1,4-beta-xylanase C
g448	contig_57	1296871	1297703	+	gi|255941538|ref|XP_002561538.1|	GO:0016787	Acetylxylan esterase 2
g449	contig_57	1298854	1299759	-	gi|302414798|ref|XP_003005231.1|	-	Isoflavone reductase homolog
g450	contig_57	1300668	1300964	-	gi|255949952|ref|XP_002565743.1|	-	-	-
g451	contig_57	1303280	1304507	+	gi|115386862|ref|XP_001209972.1|	GO:0003824	Glucoamylase I
g452	contig_57	1306648	1308906	-	gi|584413269|emb|CDM32039.1|	GO:0016868	Phosphoglucomutase-3	KOG1220
g453	contig_57	1309156	1310891	+	gi|255944439|ref|XP_002562987.1|	GO:0020037	Delta(8)-fatty-acid desaturase	KOG4232
g454	contig_57	1311154	1313268	-	gi|584413267|emb|CDM32037.1|	GO:0005515	CUE domain-containing protein 3
g455	contig_57	1313673	1314213	+	gi|255944435|ref|XP_002562985.1|	GO:0003735	40S ribosomal protein S20	KOG0900
g456	contig_57	1314609	1316603	-	gi|525580505|gb|EPS26755.1|	GO:0008270	Repetin
g457	contig_57	1317152	1318187	-	gi|255944431|ref|XP_002562983.1|	-	Uncharacterized protein ely5
g458	contig_57	1318404	1322897	+	gi|584413263|emb|CDM32033.1|	GO:0005524	Structural maintenance of chromosomes protein 4	KOG0996
g459	contig_57	1323557	1326507	+	gi|317036572|ref|XP_001397603.2|	-	Uncharacterized glycosidase Rv0584
g460	contig_57	1327270	1330389	+	gi|584413258|emb|CDM32028.1|	GO:0004553	Probable glycosidase crf1
g461	contig_57	1331646	1335107	+	gi|584413257|emb|CDM32027.1|	GO:0020037	Bifunctional P-450:NADPH-P450 reductase	KOG1158
g462	contig_57	1335634	1337233	+	gi|255944419|ref|XP_002562977.1|	GO:0050661	Thiol-specific monooxygenase	KOG1399
g463	contig_57	1338904	1339769	+	gi|255944415|ref|XP_002562975.1|	GO:0016491	Levodione reductase	KOG0725
g464	contig_57	1340066	1341276	-	gi|584413253|emb|CDM32023.1|	GO:0004553	Probable arabinan endo-1,5-alpha-L-arabinosidase D
g465	contig_57	1342540	1345263	-	gi|584413252|emb|CDM32022.1|	GO:0008270	Uncharacterized transcriptional regulatory protein C139.03
g466	contig_57	1345963	1347178	+	gi|358372067|dbj|GAA88672.1|	GO:0051287	Uncharacterized protein YLL056C	KOG1502
g467	contig_57	1347379	1348324	+	gi|425781224|gb|EKV19200.1|	-	Actin patches distal protein 1
g468	contig_57	1348802	1357274	-	gi|238501260|ref|XP_002381864.1|	GO:0016491	Lovastatin nonaketide synthase	KOG1202
g469	contig_57	1358141	1358464	+	gi|255952829|ref|XP_002567167.1|	-	-	-
g470	contig_57	1359275	1360929	+	gi|317155516|ref|XP_001825166.2|	GO:0050661	Uncharacterized monooxygenase y4iD	KOG1399
g471	contig_57	1363800	1365542	+	gi|255944399|ref|XP_002562967.1|	-	DNA replication regulator sld2
g472	contig_57	1365799	1366971	-	gi|584413248|emb|CDM32018.1|	-	Uncharacterized RING finger protein C16G5.03
g473	contig_57	1367529	1369101	+	gi|255944393|ref|XP_002562964.1|	-	Uncharacterized protein C4.02c
g474	contig_57	1373263	1374236	-	gi|255952771|ref|XP_002567138.1|	-	Protein RTM1
g475	contig_57	1377536	1378474	+	gi|255952775|ref|XP_002567140.1|	-	-	-
g476	contig_57	1379042	1381843	-	gi|238500359|ref|XP_002381414.1|	-	-	-
g477	contig_57	1385559	1390395	-	gi|145259367|ref|XP_001402347.1|	GO:0016491	Uncharacterized protein YCR102C	KOG1198
g478	contig_57	1391311	1393637	-	gi|584413243|emb|CDM32013.1|	GO:0004518	Exodeoxyribonuclease 1	KOG2518
g479	contig_57	1393942	1394579	+	gi|255944383|ref|XP_002562959.1|	-	Translation machinery-associated protein 16
g480	contig_57	1394851	1395957	+	gi|584413239|emb|CDM32009.1|	-	Mitochondrial acidic protein mam33	KOG2536
g481	contig_57	1396694	1398330	-	gi|255944379|ref|XP_002562957.1|	GO:0003896	DNA primase small subunit	KOG2851
g482	contig_57	1399834	1400850	+	gi|255944377|ref|XP_002562956.1|	-	Serum response factor-binding protein 1
g483	contig_57	1402966	1404752	-	gi|255944369|ref|XP_002562952.1|	GO:0030170	Threonine synthase	KOG2616
g484	contig_57	1405099	1406320	-	gi|425781239|gb|EKV19215.1|	GO:0016491	Probable formaldehyde dehydrogenase AdhA	KOG0023
g485	contig_57	1407118	1409687	-	gi|255944365|ref|XP_002562950.1|	-	AP-2 complex subunit beta	KOG1061
g486	contig_57	1409918	1410257	+	gi|599152582|gb|EYE91952.1|	-	-	-
g487	contig_57	1410395	1411559	-	gi|425781241|gb|EKV19217.1|	-	-	-
g488	contig_57	1412025	1412764	+	gi|425781242|gb|EKV19218.1|	GO:0016972	Mitochondrial FAD-linked sulfhydryl oxidase ERV1	KOG3355
g489	contig_57	1413218	1417124	-	gi|584413225|emb|CDM31995.1|	GO:0005515	Putative coatomer subunit alpha	KOG0292
g490	contig_57	1417706	1418401	+	gi|584413224|emb|CDM31994.1|	-	-	-
g491	contig_57	1418590	1419911	+	gi|584413223|emb|CDM31993.1|	-	-	-
g492	contig_57	1420360	1422008	+	gi|525580535|gb|EPS26785.1|	-	-	-
g493	contig_57	1422416	1423816	-	gi|255944353|ref|XP_002562944.1|	-	Tubulin-specific chaperone C	KOG2512
g494	contig_57	1425401	1427017	+	gi|159127732|gb|EDP52847.1|	GO:0008236	Tripeptidyl-peptidase sed3
g495	contig_57	1427563	1428470	+	gi|255944349|ref|XP_002562942.1|	-	26S proteasome regulatory subunit rpn12	KOG3151
g496	contig_57	1428685	1430021	-	gi|255944347|ref|XP_002562941.1|	-	WD repeat-containing protein C18.15	KOG0280
g497	contig_57	1431469	1432501	+	gi|70986658|ref|XP_748819.1|	-	NmrA-like family domain-containing protein 1
g498	contig_57	1434269	1435813	+	gi|584413219|emb|CDM31989.1|	-	Uncharacterized MFS-type transporter C18.02	KOG3764
g499	contig_57	1436300	1437606	+	gi|584413217|emb|CDM31987.1|	GO:0016491	Probable iron/ascorbate oxidoreductase DDB_G0283291	KOG0143
g500	contig_57	1437967	1440971	+	gi|255944343|ref|XP_002562939.1|	GO:0004301	Putative epoxide hydrolase	KOG2565
g501	contig_57	1441337	1442218	-	gi|255944339|ref|XP_002562937.1|	-	Vacuolar protein sorting-associated protein 51 homolog	KOG2346
g502	contig_57	1442374	1443090	+	gi|584413209|emb|CDM31979.1|	-	RecQ-mediated genome instability protein 1	KOG3683
g503	contig_57	1443254	1447622	-	gi|584413208|emb|CDM31978.1|	-	Superkiller protein 3	KOG1127
g504	contig_57	1448061	1450481	+	gi|425781258|gb|EKV19234.1|	GO:0004553	Uncharacterized glycosyl hydrolase YIR007W
g505	contig_57	1451069	1455203	+	gi|425781259|gb|EKV19235.1|	-	Protein MSN5	KOG2020
g506	contig_57	1455787	1456456	-	gi|584413205|emb|CDM31975.1|	-	NADH dehydrogenase [ubiquinone] 1 alpha subcomplex subunit 13	KOG3300
g507	contig_57	1456675	1457901	+	gi|255944325|ref|XP_002562930.1|	-	tRNA (guanine(9)-N1)-methyltransferase	KOG2967
g508	contig_57	1458527	1461095	+	gi|255944323|ref|XP_002562929.1|	-	Vacuolar import and degradation protein 27	KOG2395
g509	contig_57	1461443	1464679	-	gi|67904666|ref|XP_682589.1|	-	Putative ariadne-like RING finger protein R811
g510	contig_57	1465555	1467563	-	gi|584411600|emb|CDM30363.1|	-	Uncharacterized amino-acid permease C15C4.04c	KOG1289
g511	contig_57	1468492	1469804	+	gi|425775661|gb|EKV13918.1|	-	-	-
g512	contig_57	1470393	1471086	+	gi|255939900|ref|XP_002560719.1|	GO:0008080	-	-
g513	contig_57	1473414	1473727	+	-	-	-	-
g514	contig_57	1474362	1476916	-	gi|587680583|gb|EWZ02901.1|	GO:0008270	-	-
g515	contig_57	1477614	1480436	+	gi|358401530|gb|EHK50831.1|	-	-	-
g516	contig_57	1480869	1482076	-	gi|255944311|ref|XP_002562923.1|	-	Oxidation resistance protein 1	KOG2372
g517	contig_57	1482652	1484304	-	gi|425781265|gb|EKV19241.1|	GO:0005515	AMSH-like protease sst2	KOG2880
g518	contig_57	1484591	1486562	+	gi|425781266|gb|EKV19242.1|	-	-	-
g519	contig_57	1487574	1488797	+	gi|425781267|gb|EKV19243.1|	GO:0005524	Serine/threonine-protein kinase PknK
g520	contig_57	1489193	1489861	-	gi|584413191|emb|CDM31961.1|	-	-	-
g521	contig_57	1490349	1491569	+	gi|584413190|emb|CDM31960.1|	-	-	-
g522	contig_57	1494120	1496136	+	gi|255944293|ref|XP_002562914.1|	GO:0016884	Acetamidase	KOG1212
g523	contig_57	1496313	1497899	-	gi|584413187|emb|CDM31957.1|	-	-	-
g524	contig_57	1499079	1500960	-	gi|255944289|ref|XP_002562912.1|	-	Isocitrate dehydrogenase [NADP], mitochondrial	KOG1526
g525	contig_57	1501740	1504775	-	gi|425781273|gb|EKV19249.1|	GO:0005524	C-1-tetrahydrofolate synthase, cytoplasmic	KOG4230
g526	contig_57	1505395	1506568	+	gi|358367765|dbj|GAA84383.1|	-	Eukaryotic translation initiation factor 3 subunit I	KOG0643
g527	contig_57	1507345	1507874	-	gi|584413183|emb|CDM31953.1|	GO:0043565	Multiprotein-bridging factor 1	KOG3398
g528	contig_57	1511647	1512558	+	gi|255944281|ref|XP_002562908.1|	GO:0005515	Protein csh3	KOG3601
g529	contig_57	1513494	1517052	+	gi|255944279|ref|XP_002562907.1|	GO:0005515	Ankyrin-2	KOG0502
g530	contig_57	1518320	1519642	+	gi|525580717|gb|EPS26967.1|	-	Uncharacterized protein M6_Spy0233
g531	contig_57	1520837	1521798	-	gi|425781279|gb|EKV19255.1|	GO:0003743	Probable eukaryotic translation initiation factor 2 subunit beta	KOG2768
g532	contig_57	1522363	1522803	+	gi|425781280|gb|EKV19256.1|	-	Uncharacterized protein tam7
g533	contig_57	1523642	1525612	-	gi|255944271|ref|XP_002562903.1|	-	-	-
g534	contig_57	1527087	1527922	+	gi|584413175|emb|CDM31945.1|	GO:0003676	Cold-inducible RNA-binding protein	KOG0118
g535	contig_57	1528430	1529608	-	gi|584413174|emb|CDM31944.1|	-	Cation transport regulator-like protein	KOG3182
g536	contig_57	1531300	1532249	+	gi|525582781|gb|EPS29031.1|	-	-	-
g537	contig_57	1532675	1533781	-	gi|525582782|gb|EPS29032.1|	GO:0008168	Arsenite methyltransferase
g538	contig_57	1538739	1545853	+	gi|525583247|gb|EPS29497.1|	GO:0046872	Sodium/potassium-transporting ATPase subunit alpha-1	KOG0203
g539	contig_57	1547273	1549764	-	gi|525582989|gb|EPS29239.1|	GO:0008324	Low-affinity potassium transport protein	KOG1341
g540	contig_57	1553365	1554421	+	gi|255944263|ref|XP_002562899.1|	GO:0016491	Retinol dehydrogenase 14	KOG1208
g541	contig_57	1555096	1556292	+	gi|584413172|emb|CDM31942.1|	-	Programmed cell death protein 6	KOG0037
g542	contig_57	1557999	1560031	+	gi|425781290|gb|EKV19266.1|	-	Uncharacterized MFS-type transporter C1399.02	KOG0254
g543	contig_57	1560398	1561693	-	gi|145251095|ref|XP_001397061.1|	-	-	-
g544	contig_57	1562537	1563885	+	gi|145238874|ref|XP_001392084.1|	GO:0016491	Uncharacterized oxidoreductase C513.06c	KOG2741
g545	contig_57	1564851	1566696	+	gi|599158079|gb|EYE97152.1|	-	Uncharacterized transporter mfs2	KOG0255
g546	contig_57	1570091	1570786	+	-	-	-	-
g547	contig_57	1574281	1576086	-	gi|255940074|ref|XP_002560806.1|	-	-	-
g548	contig_57	1578886	1579639	-	gi|425781293|gb|EKV19269.1|	GO:0003735	60S ribosomal protein L33-A	KOG0887
g549	contig_57	1581535	1583420	+	gi|525580734|gb|EPS26984.1|	GO:0050661	Glucose-6-phosphate 1-dehydrogenase	KOG0563
g550	contig_57	1584666	1586604	+	gi|584413163|emb|CDM31933.1|	-	General alpha-glucoside permease	KOG0637
g551	contig_57	1587286	1588179	+	gi|255944227|ref|XP_002562881.1|	-	Uncharacterized protein C757.03c
g552	contig_57	1588916	1592321	-	gi|584413156|emb|CDM31926.1|	-	Morphogenesis-related protein MSB1
g553	contig_57	1594014	1595891	+	gi|255944223|ref|XP_002562879.1|	GO:0043565	Transcription factor RLM1	KOG0014
g554	contig_57	1596625	1597230	+	gi|584413154|emb|CDM31924.1|	GO:0016846	-	-
g555	contig_57	1597516	1598814	+	gi|425781168|gb|EKV19147.1|	GO:0030170	1-aminocyclopropane-1-carboxylate synthase-like protein 1	KOG0256
g556	contig_57	1599587	1600580	-	gi|255944213|ref|XP_002562874.1|	GO:0003824	Phosphoadenosine phosphosulfate reductase	KOG0189
g557	contig_57	1601463	1602962	+	gi|255944211|ref|XP_002562873.1|	GO:0003824	Probable phosphoserine phosphatase	KOG1615
g558	contig_57	1604037	1605287	-	gi|255944209|ref|XP_002562872.1|	GO:0051536	Lipoyl synthase, mitochondrial	KOG2672
g559	contig_57	1605808	1607478	-	gi|255944207|ref|XP_002562871.1|	-	-	-
g560	contig_57	1609132	1610910	+	gi|425781174|gb|EKV19153.1|	-	Pre-rRNA-processing protein IPI3	KOG0646
g561	contig_57	1611274	1612071	-	gi|255944203|ref|XP_002562869.1|	GO:0016829	Deoxyribose-phosphate aldolase	KOG3981
g562	contig_57	1613314	1615053	-	gi|255944201|ref|XP_002562868.1|	GO:0008168	Uroporphyrinogen-III C-methyltransferase	KOG1527
g563	contig_57	1615984	1617672	+	gi|425781178|gb|EKV19157.1|	GO:0005515	26S proteasome non-ATPase regulatory subunit 12	KOG1498
g564	contig_57	1617887	1618747	-	gi|425781179|gb|EKV19158.1|	-	Dihydrofolate reductase	KOG2551
g565	contig_57	1619011	1619506	+	gi|255944195|ref|XP_002562865.1|	-	-	-
g566	contig_57	1620975	1621531	-	gi|255944193|ref|XP_002562864.1|	GO:0003735	40S ribosomal protein S27	KOG1779
g567	contig_57	1622903	1623232	+	gi|584407618|emb|CDM36443.1|	-	-	-
g568	contig_57	1623733	1625520	-	gi|255944191|ref|XP_002562863.1|	GO:0016780	Uncharacterized CDP-alcohol phosphatidyltransferase class-I family protein C22A12.10	KOG2877
g569	contig_57	1626397	1627586	-	gi|425781184|gb|EKV19163.1|	-	Protein NipSnap homolog 1	KOG2883
g570	contig_57	1628440	1629212	+	gi|584413136|emb|CDM31906.1|	GO:0010181	Pyridoxamine 5'-phosphate oxidase C1952.08c homolog
g571	contig_57	1629696	1630586	+	gi|255944183|ref|XP_002562859.1|	GO:0003824	Probable octanoyltransferase	KOG0325
g572	contig_57	1631495	1632522	-	gi|525580649|gb|EPS26899.1|	-	GTP-binding protein RHO3	KOG0393
g573	contig_57	1633264	1634877	+	gi|255944179|ref|XP_002562857.1|	GO:0005515	COP9 signalosome complex subunit 2	KOG1464
g574	contig_57	1636050	1638015	+	gi|584413131|emb|CDM31901.1|	-	Ubiquitin thioesterase OTUB1	KOG3991
g575	contig_57	1639524	1640356	-	gi|255944175|ref|XP_002562855.1|	-	Isonitrile hydratase
g576	contig_57	1641392	1643488	+	gi|255944173|ref|XP_002562854.1|	GO:0022857	Probable quinate permease	KOG0254
g577	contig_57	1643717	1646034	-	gi|255944171|ref|XP_002562853.1|	GO:0008270	Regulatory protein GAL4
g578	contig_57	1646937	1648182	+	gi|255944169|ref|XP_002562852.1|	-	-	-
g579	contig_57	1648688	1649299	-	gi|255944167|ref|XP_002562851.1|	GO:0003735	60S ribosomal protein L37	KOG3475
g580	contig_57	1649775	1651181	-	gi|584413125|emb|CDM31895.1|	-	Pre-mRNA-splicing factor slu7	KOG2560
g581	contig_57	1651478	1656646	+	gi|255944163|ref|XP_002562849.1|	GO:0003887	DNA polymerase zeta catalytic subunit	KOG0968
g582	contig_57	1656911	1661249	-	gi|425783248|gb|EKV21105.1|	GO:0003968	RNA-dependent RNA polymerase 1	KOG0988
g583	contig_57	1661856	1665387	-	gi|255944159|ref|XP_002562847.1|	-	-	-
g584	contig_57	1665994	1667881	+	gi|584413121|emb|CDM31891.1|	GO:0050660	D-lactate dehydrogenase [cytochrome], mitochondrial	KOG1231
g585	contig_57	1668433	1669637	+	gi|255944155|ref|XP_002562845.1|	GO:0051287	Probable aspartate-semialdehyde dehydrogenase	KOG4777
g586	contig_57	1669941	1671127	+	gi|584413119|emb|CDM31889.1|	GO:0003723	40S ribosomal protein S4-A	KOG0378
g587	contig_57	1674091	1675578	+	gi|255944149|ref|XP_002562842.1|	-	-	-
g588	contig_57	1676365	1676903	-	gi|255944147|ref|XP_002562841.1|	-	-	-
g589	contig_57	1677316	1679448	+	gi|255944145|ref|XP_002562840.1|	-	Meiotically up-regulated gene 152 protein
g590	contig_57	1680106	1680768	-	gi|255944143|ref|XP_002562839.1|	GO:0035091	Sorting nexin-3_x0001_sp|Q4WWS3.3|SNX3_ASPFU RecName: Full=Sorting nexin-3	KOG2527
g591	contig_57	1682403	1684746	+	gi|425783257|gb|EKV21114.1|	-	LEC14B protein	KOG0266
g592	contig_57	1685783	1686184	-	gi|425780995|gb|EKV18977.1|	-	Probable protein transport protein Sec61 subunit gamma	KOG3498
g593	contig_57	1687133	1688469	+	gi|425780996|gb|EKV18978.1|	-	-	-
g594	contig_57	1690218	1691622	+	gi|584417224|emb|CDM28934.1|	-	-	-
g595	contig_57	1694325	1696938	-	gi|255944131|ref|XP_002562833.1|	-	-	-
g596	contig_57	1699415	1699813	-	-	-	-	-
g597	contig_57	1703155	1704457	-	gi|255944125|ref|XP_002562830.1|	-	Uncharacterized mitochondrial carrier C688.09	KOG0757
g598	contig_57	1705239	1706021	-	gi|255944123|ref|XP_002562829.1|	GO:0003735	60S ribosomal protein L21-A	KOG1732
g599	contig_57	1706267	1707123	+	gi|169780348|ref|XP_001824638.1|	GO:0019843	40S ribosomal protein S9	KOG3301
g600	contig_57	1707446	1708434	-	gi|584413106|emb|CDM31876.1|	-	-	-
g601	contig_57	1708728	1710070	+	gi|425781001|gb|EKV18983.1|	-	-	-
g602	contig_57	1710600	1711421	+	gi|134057457|emb|CAK37965.1|	-	Uncharacterized 21.2 kDa protein
g603	contig_57	1712533	1717190	+	gi|255944109|ref|XP_002562822.1|	GO:0005525	Putative vacuolar protein sorting-associated protein TDA6	KOG2655
g604	contig_57	1717728	1720513	+	gi|255944107|ref|XP_002562821.1|	-	Annexin A7	KOG0819
g605	contig_57	1720739	1721794	-	gi|317033959|ref|XP_001395704.2|	-	-	-
g606	contig_57	1722490	1724014	+	gi|255944105|ref|XP_002562820.1|	-	-	-
g607	contig_57	1725875	1730510	+	gi|584413100|emb|CDM31870.1|	-	-	-
g608	contig_57	1731420	1733296	-	gi|584413099|emb|CDM31869.1|	GO:0016787	Carboxypeptidase S	KOG2275
g609	contig_57	1735254	1735973	+	gi|425781009|gb|EKV18991.1|	-	Uncharacterized protein in LEU2 3'region	KOG4157
g610	contig_57	1737376	1740245	-	gi|425781010|gb|EKV18992.1|	-	-	-
g611	contig_57	1741268	1743006	-	gi|255944085|ref|XP_002562810.1|	-	GCR1-dependent translation factor 1	KOG2881
g612	contig_57	1743237	1747699	+	gi|255944079|ref|XP_002562807.1|	-	Quinidine resistance protein 3	KOG0255
g613	contig_57	1748672	1750583	+	gi|255944061|ref|XP_002562798.1|	-	Major facilitator superfamily domain-containing protein 1	KOG4686
g614	contig_57	1751747	1755831	+	gi|425781015|gb|EKV18997.1|	GO:0005524	Peroxide stress-activated histidine kinase mak2	KOG0519
g615	contig_57	1757571	1759213	-	gi|425773579|gb|EKV11925.1|	-	Phosphatidate phosphatase APP1
g616	contig_57	1760053	1762775	-	gi|67537298|ref|XP_662423.1|	GO:0004356	Protein fluG	KOG0683
g617	contig_57	1763314	1765050	-	gi|255944055|ref|XP_002562795.1|	GO:0016491	Putative succinate-semialdehyde dehydrogenase C1002.12c [NADP(+)]	KOG2451
g618	contig_57	1765738	1769206	+	gi|317145349|ref|XP_001820711.2|	GO:0004553	Beta-hexosaminidase	KOG2499
g619	contig_57	1770544	1770955	-	gi|557723231|dbj|GAD98013.1|	-	Putative tartrate transporter	KOG2533
g620	contig_57	1771899	1775323	+	gi|255944033|ref|XP_002562784.1|	GO:0003824	Linear gramicidin synthase subunit D	KOG1178
g621	contig_57	1775791	1777293	-	gi|584413076|emb|CDM31846.1|	GO:0004553	Chitinase 1	KOG2806
g622	contig_57	1778199	1779770	-	gi|584413075|emb|CDM31845.1|	GO:0017176	Phosphatidylinositol N-acetylglucosaminyltransferase GPI2 subunit	KOG3059
g623	contig_57	1781109	1782657	-	gi|584413073|emb|CDM31843.1|	GO:0005524	Pantothenate kinase	KOG2201
g624	contig_57	1784400	1786668	+	gi|425781024|gb|EKV19006.1|	GO:0008026	ATP-dependent RNA helicase DDX3X	KOG0335
g625	contig_57	1787007	1788584	+	gi|425781025|gb|EKV19007.1|	GO:0016810	Bifunctional xylanase/deacetylase
g626	contig_57	1789222	1792276	-	gi|255944019|ref|XP_002562777.1|	GO:0016757	Putative aryl-alcohol dehydrogenase C977.14c
g627	contig_57	1792768	1793976	-	gi|425781027|gb|EKV19009.1|	-	Phosphopantothenate--cysteine ligase CAB2	KOG2728
g628	contig_57	1794447	1795998	-	gi|166990583|sp|A7KAN7.1|ATG29_PENCW	-	Autophagy-related protein 29
g629	contig_57	1797025	1797906	+	gi|584413067|emb|CDM31837.1|	GO:0016787	AB hydrolase superfamily protein C1039.03	KOG1515
g630	contig_57	1798460	1800112	+	gi|425781031|gb|EKV19013.1|	-	-	-
g631	contig_57	1800539	1801592	-	gi|425781032|gb|EKV19014.1|	-	-	-
g632	contig_57	1802215	1804014	+	gi|255944009|ref|XP_002562772.1|	-	Uncharacterized membrane protein YBR220C	KOG3574
g633	contig_57	1806204	1808103	-	gi|525582506|gb|EPS28756.1|	-	Beta-lactamase-like protein 2
g634	contig_57	1814682	1815182	-	gi|557727623|dbj|GAD93728.1|	-	Bile acid 7-alpha dehydratase
g635	contig_57	1821817	1822638	+	gi|255944001|ref|XP_002562768.1|	-	Uncharacterized protein yae1	KOG4774
g636	contig_57	1825344	1827023	-	gi|255943999|ref|XP_002562767.1|	-	-	-
g637	contig_57	1830944	1835488	+	gi|255943995|ref|XP_002562765.1|	-	-	-
g638	contig_57	1835961	1837409	-	gi|425781039|gb|EKV19021.1|	-	Protein suppressor of hairy wing	KOG2248
g639	contig_57	1837902	1839071	-	gi|350632533|gb|EHA20900.1|	GO:0016788	-	-
g640	contig_57	1842811	1843707	-	gi|615458226|ref|XP_007597040.1|	-	-	-
g641	contig_57	1845926	1847055	+	gi|596698138|ref|XP_007282040.1|	GO:0016491	-	-
g642	contig_57	1847721	1850614	-	gi|115385887|ref|XP_001209490.1|	-	Albumin-2
g643	contig_57	1851842	1853452	-	gi|302889080|ref|XP_003043426.1|	GO:0004553	Xylosidase/arabinosidase
g644	contig_57	1854672	1856176	+	gi|302888882|ref|XP_003043327.1|	GO:0022857	Low-affinity glucose transporter HXT1	KOG0254
g645	contig_57	1857494	1859225	+	gi|587733169|gb|EXA30885.1|	GO:0004565	-	-
g646	contig_57	1859686	1861796	-	gi|302905241|ref|XP_003049227.1|	GO:0008270	Uncharacterized transcriptional regulatory protein C1327.01c
g647	contig_57	1862526	1863629	+	gi|115390569|ref|XP_001212789.1|	-	Esterase EstB
g648	contig_57	1865973	1872288	-	gi|452979023|gb|EME78786.1|	GO:0022857	Uncharacterized oxidoreductase C26F1.07	KOG0254
g649	contig_57	1872353	1873215	-	gi|358370648|dbj|GAA87259.1|	GO:0016773	Uncharacterized sugar kinase YDR109C	KOG2517
g650	contig_57	1873295	1879347	+	gi|115386034|ref|XP_001209558.1|	GO:0016491	Sorbose reductase SOU1
g651	contig_57	1879549	1881641	-	gi|315045508|ref|XP_003172129.1|	-	Putative HC-toxin efflux carrier TOXA	KOG0254
g652	contig_57	1884429	1885148	+	gi|255943494|ref|XP_002562515.1|	-	-	-
g653	contig_57	1885764	1892809	-	gi|584411396|emb|CDM30159.1|	GO:0003824	Mitochondrial 2-methylisocitrate lyase	KOG1260
g654	contig_57	1893586	1895310	-	gi|255939283|ref|XP_002560411.1|	-	pH-response regulator protein palI/RIM9
g655	contig_57	1898919	1901195	+	gi|255939279|ref|XP_002560409.1|	-	-	-
g656	contig_57	1901857	1903217	-	gi|599156969|gb|EYE96083.1|	-	-	-
g657	contig_57	1904049	1904642	+	gi|584413044|emb|CDM31814.1|	-	-	-
g658	contig_57	1904850	1907454	-	gi|525580568|gb|EPS26818.1|	GO:0008270	Uncharacterized RNA-binding protein C57A7.13	KOG0154
g659	contig_57	1908113	1910797	+	gi|255939271|ref|XP_002560405.1|	GO:0043169	Alpha-glucosidase	KOG3307
g660	contig_57	1911037	1912077	-	gi|255939269|ref|XP_002560404.1|	-	Protein SCO1, mitochondrial	KOG2792
g661	contig_57	1912863	1914080	-	gi|525580492|gb|EPS26742.1|	GO:0004497	Salicylate hydroxylase	KOG2614
g662	contig_57	1914670	1916107	-	gi|255939267|ref|XP_002560403.1|	GO:0016788	Non-hemolytic phospholipase C
g663	contig_57	1916777	1918348	-	gi|255939265|ref|XP_002560402.1|	GO:0004497	Pentachlorophenol 4-monooxygenase	KOG3855
g664	contig_57	1918828	1921019	-	gi|255939263|ref|XP_002560401.1|	GO:0008270	Uncharacterized transcriptional regulatory protein C139.03
g665	contig_57	1922988	1925698	+	gi|584413034|emb|CDM31804.1|	GO:0008270	Uncharacterized transcriptional regulatory protein C1773.12
g666	contig_57	1926019	1927225	-	gi|255939259|ref|XP_002560399.1|	GO:0005515	Integral membrane protein sed5	KOG0812
g667	contig_57	1927987	1932939	+	gi|255939257|ref|XP_002560398.1|	-	-	-
g668	contig_57	1933151	1933570	-	gi|584415145|emb|CDM26837.1|	-	-	-
g669	contig_57	1934405	1936401	-	gi|425781059|gb|EKV19041.1|	-	ABC1 family protein C10F6.14c	KOG1235
g670	contig_57	1936686	1937261	-	gi|584413021|emb|CDM31791.1|	-	-	-
g671	contig_57	1937450	1940070	+	gi|584413022|emb|CDM31792.1|	GO:0016787	7, 8-dihydropterin-6-methyl-4-(beta-D-ribofuranosyl)- aminobenzene-5'-phosphate synthase
g672	contig_57	1947687	1950718	+	gi|425781057|gb|EKV19039.1|	GO:0046872	Plasma membrane ATPase	KOG0205
g673	contig_57	1951514	1952907	+	gi|525580486|gb|EPS26736.1|	GO:0030599	Probable pectinesterase A
g674	contig_57	1954100	1955020	-	gi|584413018|emb|CDM31788.1|	GO:0030528	Transcription elongation factor S-II	KOG1105
g675	contig_57	1956171	1957424	-	gi|584413016|emb|CDM31786.1|	-	Ran GTPase-activating protein 1	KOG1909
g676	contig_57	1957767	1958152	+	gi|584413015|emb|CDM31785.1|	GO:0016531	Cytochrome c oxidase copper chaperone
g677	contig_57	1958468	1960374	-	gi|584413014|emb|CDM31784.1|	GO:0016758	Probable dolichyl pyrophosphate Man9GlcNAc2 alpha-1,3-glucosyltransferase	KOG2575
g678	contig_57	1961148	1962649	+	gi|425781065|gb|EKV19047.1|	GO:0003676	Protein gar2	KOG4210
g679	contig_57	1963370	1964859	+	gi|255939155|ref|XP_002560347.1|	-	-	-
g680	contig_57	1965637	1966896	+	gi|255954741|ref|XP_002568123.1|	GO:0004190	Probable aspartic-type endopeptidase AFUA_3G01220	KOG1339
g681	contig_57	1969470	1970615	+	gi|597588093|ref|XP_007297103.1|	GO:0008270	-	-
g682	contig_57	1970940	1971527	-	gi|67526045|ref|XP_661084.1|	-	-	-
g683	contig_57	1972569	1974389	-	gi|425781957|gb|EKV19891.1|	GO:0050660	Glucose oxidase	KOG1238
g684	contig_57	1975516	1976830	+	gi|425781956|gb|EKV19890.1|	-	Uncharacterized protein SSP0869
g685	contig_57	1978924	1979922	+	gi|584413007|emb|CDM31777.1|	GO:0018576	Catechol 1,2-dioxygenase
g686	contig_57	1980354	1984635	-	gi|255955273|ref|XP_002568389.1|	GO:0042626	Leptomycin B resistance protein pmd1	KOG0055
g687	contig_57	1986643	1988683	-	gi|255944695|ref|XP_002563115.1|	GO:0050660	Ferric/cupric reductase transmembrane component 2	KOG0039
g688	contig_57	1991672	1994773	-	gi|584413398|emb|CDM32169.1|	GO:0030528	Sterol regulatory element-binding protein 1	KOG2588
g689	contig_57	1996192	1999260	-	gi|350633848|gb|EHA22212.1|	GO:0016829	Uracil-regulated protein 1	KOG1284
g690	contig_57	2000167	2001344	+	gi|255944703|ref|XP_002563119.1|	GO:0008270	-	-
g691	contig_57	2002325	2003621	-	gi|525583425|gb|EPS29675.1|	-	-	-
g692	contig_57	2004556	2006328	-	gi|425765584|gb|EKV04255.1|	GO:0008026	ATP-dependent RNA helicase dbp5	KOG0332
g693	contig_57	2006845	2009335	+	gi|255944707|ref|XP_002563121.1|	GO:0005515	Protein BZZ1	KOG3565
g694	contig_57	2009770	2010432	-	gi|255944709|ref|XP_002563122.1|	-	-	-
g695	contig_57	2014717	2016295	-	gi|255944711|ref|XP_002563123.1|	GO:0020037	O-methylsterigmatocystin oxidoreductase	KOG0156
g696	contig_57	2017449	2018594	-	gi|584407043|emb|CDM37351.1|	-	Disintegrin and metalloproteinase domain-containing protein B	KOG3607
g697	contig_57	2019861	2020148	+	gi|584413405|emb|CDM32176.1|	-	-	-
g698	contig_57	2020381	2022350	-	gi|255944715|ref|XP_002563125.1|	GO:0008270	-	-
g699	contig_57	2023068	2024723	-	gi|599157714|gb|EYE96798.1|	-	Uncharacterized transporter C417.10	KOG2533
g700	contig_57	2025507	2026598	+	gi|440637728|gb|ELR07647.1|	-	-	-
g701	contig_57	2028538	2028982	-	gi|255951382|ref|XP_002566458.1|	-	-	-
g702	contig_57	2030239	2031023	+	gi|584413407|emb|CDM32178.1|	-	-	-
g703	contig_57	2031630	2032922	+	gi|425765579|gb|EKV04250.1|	-	-	-
g704	contig_57	2033657	2035168	+	gi|255944725|ref|XP_002563130.1|	-	Probable argininosuccinate lyase	KOG1316
g705	contig_57	2036615	2037022	+	-	-	-	-
g706	contig_57	2038047	2040280	-	gi|425765576|gb|EKV04247.1|	GO:0016491	Probable succinate dehydrogenase [ubiquinone] flavoprotein subunit, mitochondrial	KOG2403
g707	contig_57	2040902	2042407	-	gi|525580459|gb|EPS26709.1|	GO:0005524	26S protease regulatory subunit 7 homolog	KOG0729
g708	contig_57	2042730	2044648	+	gi|584413413|emb|CDM32184.1|	GO:0005524	T-complex protein 1 subunit delta	KOG0358
g709	contig_57	2045384	2048213	+	gi|255944737|ref|XP_002563136.1|	GO:0008236	Probable dipeptidyl-aminopeptidase B	KOG2100
g710	contig_57	2048697	2057473	-	gi|255944739|ref|XP_002563137.1|	-	-	-
g711	contig_57	2059386	2062202	+	gi|584413417|emb|CDM32188.1|	-	-	-
g712	contig_57	2065391	2066329	+	gi|425765570|gb|EKV04241.1|	-	-	-
g713	contig_57	2070560	2071939	-	gi|255944749|ref|XP_002563142.1|	-	Spherulin-4
g714	contig_57	2072631	2073947	+	gi|584413422|emb|CDM32193.1|	GO:0050662	UDP-glucose 4-epimerase 3	KOG1371
g715	contig_57	2074687	2075481	+	gi|255944753|ref|XP_002563144.1|	-	54S ribosomal protein L37, mitochondrial
g716	contig_57	2075745	2076593	-	gi|255944755|ref|XP_002563145.1|	-	-	-
g717	contig_57	2077275	2079969	+	gi|584413425|emb|CDM32196.1|	GO:0004629	1-phosphatidylinositol 4,5-bisphosphate phosphodiesterase 1	KOG0169
g718	contig_57	2082944	2083337	+	gi|255944761|ref|XP_002563148.1|	-	-	-
g719	contig_57	2083510	2085424	-	gi|584413429|emb|CDM32200.1|	-	Uncharacterized transporter YIL166C	KOG2533
g720	contig_57	2086472	2087854	+	gi|255944765|ref|XP_002563150.1|	GO:0016491	Alpha-ketoglutarate-dependent sulfonate dioxygenase
g721	contig_57	2088977	2090014	+	gi|584412974|emb|CDM31744.1|	-	-	-
g722	contig_57	2090125	2090970	-	gi|573054927|gb|ETS74862.1|	-	-	-
g723	contig_57	2092485	2093188	-	gi|169762954|ref|XP_001727377.1|	GO:0016491	Uncharacterized oxidoreductase SSP1627
g724	contig_57	2096334	2098227	+	gi|225560979|gb|EEH09260.1|	GO:0020037	Putative cytochrome P450 CYP13A6	KOG0158
g725	contig_57	2102147	2103634	+	gi|525580700|gb|EPS26950.1|	-	-	-
g726	contig_57	2103715	2104600	-	gi|525580699|gb|EPS26949.1|	-	-	-
g727	contig_57	2105095	2107666	-	gi|584413431|emb|CDM32202.1|	-	-	-
g728	contig_57	2108023	2109485	-	gi|255944769|ref|XP_002563152.1|	-	-	-
g729	contig_57	2109839	2112143	-	gi|255944771|ref|XP_002563153.1|	-	Uncharacterized amino-acid permease C15C4.04c	KOG1289
g730	contig_57	2113502	2118039	-	gi|255944783|ref|XP_002563159.1|	GO:0005524	Peroxisomal biogenesis factor 6	KOG0736
g731	contig_57	2120364	2123048	+	gi|255944801|ref|XP_002563168.1|	-	Zinc finger transcription factor ace1
g732	contig_57	2123827	2126965	+	gi|425765678|gb|EKV04347.1|	GO:0035091	PX domain-containing protein C1450.12	KOG2273
g733	contig_57	2127709	2128998	-	gi|119470605|ref|XP_001258053.1|	-	-	-
g734	contig_57	2129865	2131600	+	gi|584406783|emb|CDM37083.1|	GO:0020037	Pisatin demethylase	KOG0158
g735	contig_57	2132225	2133565	-	gi|255944805|ref|XP_002563170.1|	GO:0005515	Ankyrin repeat, PH and SEC7 domain containing protein secG	KOG4177
g736	contig_57	2133889	2134958	+	gi|255944807|ref|XP_002563171.1|	GO:0008270	-	-
g737	contig_57	2135961	2136934	-	gi|584415147|emb|CDM26839.1|	GO:0050113	Inositol oxygenase 1	KOG1573
g738	contig_57	2137882	2140501	+	gi|350635024|gb|EHA23386.1|	GO:0003899	tRNA (guanine(37)-N1)-methyltransferase	KOG2078
g739	contig_57	2141440	2143516	+	gi|255944813|ref|XP_002563174.1|	GO:0008270	Transcriptional activator protein DAL81
g740	contig_57	2145167	2146003	+	gi|169597491|ref|XP_001792169.1|	-	Uncharacterized protein YBR096W	KOG4366
g741	contig_57	2146114	2148818	-	gi|584413445|emb|CDM32217.1|	-	-	-
g742	contig_57	2151892	2153301	+	gi|584413446|emb|CDM32218.1|	-	Uncharacterized protein YdcJ
g743	contig_57	2153937	2155210	+	gi|599160226|gb|EYE99210.1|	-	-	-
g744	contig_57	2155620	2157563	+	gi|557721674|dbj|GAD99476.1|	GO:0050660	Choline dehydrogenase	KOG1238
g745	contig_57	2157845	2158609	-	gi|425765669|gb|EKV04338.1|	-	54S ribosomal protein L49, mitochondrial	KOG0453
g746	contig_57	2159070	2160051	+	gi|584413448|emb|CDM32220.1|	-	Ribosome biogenesis protein nsa2	KOG3163
g747	contig_57	2160913	2163387	-	gi|584413449|emb|CDM32221.1|	GO:0005524	Serine/threonine-protein kinase mph1	KOG0596
g748	contig_57	2164519	2165641	+	gi|425765666|gb|EKV04335.1|	-	Serine/arginine repetitive matrix protein 1	KOG2146
g749	contig_57	2166792	2169242	-	gi|425765665|gb|EKV04334.1|	-	-	-
g750	contig_57	2173916	2175274	-	gi|557729729|dbj|GAD91761.1|	GO:0008270	Archaemetzincin-2
g751	contig_57	2177170	2178397	-	-	GO:0004222	-	-
g752	contig_57	2180266	2181627	+	gi|615399561|ref|XP_007579829.1|	-	-	-
g753	contig_57	2182100	2183457	-	gi|584413453|emb|CDM32225.1|	-	-	-
g754	contig_57	2183735	2184268	-	gi|238504602|ref|XP_002383532.1|	-	-	-
g755	contig_57	2184689	2186079	-	gi|189196474|ref|XP_001934575.1|	GO:0004497	FAD-dependent urate hydroxylase
g756	contig_57	2186535	2187563	+	gi|189196476|ref|XP_001934576.1|	GO:0016491	Probable iron/ascorbate oxidoreductase DDB_G0283291	KOG0143
g757	contig_57	2188208	2190089	+	gi|189196482|ref|XP_001934579.1|	GO:0020037	Cholesterol 24-hydroxylase	KOG0158
g758	contig_57	2190710	2194716	-	gi|471560388|gb|EMR62513.1|	GO:0016491	Protein TOXD	KOG1198
g759	contig_57	2195115	2196432	+	gi|242779084|ref|XP_002479371.1|	GO:0016491	Uncharacterized oxidoreductase ORF334	KOG2741
g760	contig_57	2197183	2198774	-	gi|530471411|gb|EQB52197.1|	GO:0050660	Bifunctional solanapyrone synthase	KOG1231
g761	contig_57	2199351	2211698	+	gi|471560362|gb|EMR62487.1|	GO:0048037	Nonribosomal peptide synthetase 14	KOG1178
g762	contig_57	2212582	2214056	+	gi|557720842|dbj|GAE00239.1|	GO:0008171	Sterigmatocystin 8-O-methyltransferase	KOG3178
g763	contig_57	2214366	2215635	-	gi|255931425|ref|XP_002557269.1|	-	-	-
g764	contig_57	2220564	2220969	-	gi|425778381|gb|EKV16510.1|	-	-	-
g765	contig_57	2221373	2222113	+	gi|255940294|ref|XP_002560916.1|	-	Uncharacterized protein YER010C
g766	contig_57	2222701	2223600	+	gi|255944859|ref|XP_002563197.1|	GO:0003824	Uncharacterized hydrolase C21C3.09c	KOG1535
g767	contig_57	2224027	2224857	+	gi|145241512|ref|XP_001393402.1|	-	Non-heme chloroperoxidase	KOG4178
g768	contig_57	2226356	2227173	-	gi|189211678|ref|XP_001942168.1|	-	-	-
g769	contig_57	2228700	2230793	+	gi|255951082|ref|XP_002566308.1|	GO:0003824	Squalene--hopene cyclase	KOG0497
g770	contig_57	2233838	2234431	+	gi|91778691|ref|YP_553899.1|	-	-	-
g771	contig_57	2234766	2236679	-	gi|584144048|gb|EWG53346.1|	-	Uncharacterized transporter C417.10	KOG2533
g772	contig_57	2237311	2238651	+	gi|400597289|gb|EJP65024.1|	GO:0016787	Uncharacterized protein YJL213W
g773	contig_57	2239586	2241527	+	gi|400597290|gb|EJP65025.1|	GO:0008270	Uncharacterized transcriptional regulatory protein C417.09c
g774	contig_57	2241866	2243175	-	gi|358380766|gb|EHK18443.1|	GO:0016491	Quinone oxidoreductase-like protein At1g23740, chloroplastic	KOG1198
g775	contig_57	2245603	2248618	+	gi|389630554|ref|XP_003712930.1|	-	(+)-pulegone reductase
g776	contig_57	2250794	2251273	-	-	-	-	-
g777	contig_57	2252142	2253669	-	gi|425778379|gb|EKV16508.1|	GO:0008026	ATP-dependent RNA helicase eIF4A	KOG0327
g778	contig_57	2254166	2255770	+	gi|255944865|ref|XP_002563200.1|	-	F-box protein At5g06550	KOG2130
g779	contig_57	2255949	2256823	-	gi|584413462|emb|CDM32234.1|	GO:0005375	Copper transport protein CTR2	KOG3386
g780	contig_57	2257133	2258119	+	gi|584413463|emb|CDM32235.1|	-	Chromatin modification-related protein eaf-6	KOG3856
g781	contig_57	2258518	2261847	-	gi|255944871|ref|XP_002563203.1|	GO:0015923	Alpha-mannosidase	KOG4342
g782	contig_57	2262790	2265788	-	gi|255944875|ref|XP_002563205.1|	-	Trichothecene 3-O-acetyltransferase
g783	contig_57	2266617	2268489	+	gi|584413467|emb|CDM32239.1|	-	Choline transport protein	KOG1289
g784	contig_57	2270116	2271470	-	gi|255944881|ref|XP_002563208.1|	-	-	-
g785	contig_57	2274438	2275706	+	gi|255944885|ref|XP_002563210.1|	GO:0016491	Quinone oxidoreductase-like protein At1g23740, chloroplastic	KOG1198
g786	contig_57	2276088	2277119	-	gi|525580000|gb|EPS26250.1|	GO:0016491	Uncharacterized oxidoreductase C736.13	KOG1208
g787	contig_57	2277418	2278689	-	gi|584413473|emb|CDM32245.1|	-	-	-
g788	contig_57	2279024	2280095	+	gi|425778443|gb|EKV16570.1|	GO:0004252	ATP-dependent Clp protease proteolytic subunit	KOG0840
g789	contig_57	2280531	2281685	-	gi|425778442|gb|EKV16569.1|	-	DSC E3 ubiquitin ligase complex subunit 4
g790	contig_57	2281949	2283649	-	gi|255944903|ref|XP_002563219.1|	GO:0008270	Aspartyl aminopeptidase	KOG2596
g791	contig_57	2284569	2286551	+	gi|584413483|emb|CDM32256.1|	-	Fizzy-related protein homolog	KOG0305
g792	contig_57	2288265	2290472	-	gi|302890445|ref|XP_003044107.1|	GO:0016758	Sterol 3-beta-glucosyltransferase	KOG1192
g793	contig_57	2293993	2295010	-	gi|525585875|gb|EPS32125.1|	-	-	-
g794	contig_57	2299217	2300191	-	gi|573053383|gb|ETS73377.1|	-	-	-
g795	contig_57	2300871	2301212	-	gi|584145246|gb|EWG54517.1|	GO:0022857	Lactose permease	KOG0254
g796	contig_57	2302156	2302601	+	gi|512188260|gb|EPE04033.1|	-	-	-
g797	contig_57	2302712	2303721	+	gi|512188260|gb|EPE04033.1|	-	Uncharacterized transporter C1529.01	KOG0255
g798	contig_57	2306717	2308915	-	gi|517324521|emb|CCT74677.1|	GO:0005525	-	-
g799	contig_57	2309248	2313262	+	gi|587730842|gb|EXA28558.1|	GO:0005515	Ankyrin-3	KOG4177
g800	contig_57	2314800	2318908	-	gi|584406301|emb|CDM38179.1|	-	-	-
g801	contig_57	2319741	2321478	-	gi|296808005|ref|XP_002844341.1|	GO:0020037	Cytochrome P450 52A13	KOG0157
g802	contig_57	2322221	2325575	+	gi|296808007|ref|XP_002844342.1|	-	Kinesin light chain 4	KOG1840
g803	contig_57	2331384	2332638	-	gi|255944909|ref|XP_002563222.1|	GO:0008415	Pyruvate dehydrogenase complex protein X component, mitochondrial	KOG0557
g804	contig_57	2332814	2333689	+	gi|255944911|ref|XP_002563223.1|	-	-	-
g805	contig_57	2333938	2338105	+	gi|255944913|ref|XP_002563224.1|	GO:0005524	Structural maintenance of chromosomes protein 1	KOG0018
g806	contig_57	2338865	2340022	-	gi|425778436|gb|EKV16563.1|	-	-	-
g807	contig_57	2341193	2348007	+	gi|557723792|dbj|GAD97470.1|	-	Uncharacterized protein YDR124W
g808	contig_57	2348707	2350411	+	gi|255944925|ref|XP_002563230.1|	-	Uncharacterized membrane protein C776.05	KOG2895
g809	contig_57	2350867	2352541	+	gi|584413492|emb|CDM32265.1|	-	LETM1 domain-containing protein mdm28, mitochondrial	KOG1043
g810	contig_57	2353181	2355179	+	gi|317140723|ref|XP_001818377.2|	GO:0016787	Peroxisomal coenzyme A diphosphatase 1, peroxisomal	KOG3069
g811	contig_57	2355479	2356927	+	gi|584413494|emb|CDM32267.1|	-	-	-
g812	contig_57	2359259	2361210	-	gi|255944851|ref|XP_002563193.1|	GO:0020037	O-methylsterigmatocystin oxidoreductase	KOG0156
g813	contig_57	2362445	2362734	+	-	-	-	-
g814	contig_57	2363564	2365278	+	gi|119483588|ref|XP_001261697.1|	GO:0022857	Carboxylic acid transporter protein homolog	KOG0252
g815	contig_57	2365479	2366677	+	gi|425778432|gb|EKV16559.1|	GO:0003824	4-nitrophenylphosphatase	KOG2882
g816	contig_57	2367327	2368660	-	gi|584413498|emb|CDM32272.1|	GO:0005524	Replication factor C subunit 2	KOG0989
g817	contig_57	2368924	2370209	-	gi|255944957|ref|XP_002563246.1|	-	Protein transport protein sec20
g818	contig_57	2370777	2371097	+	gi|425778429|gb|EKV16556.1|	-	-	-
g819	contig_57	2371410	2372451	-	gi|425778428|gb|EKV16555.1|	GO:0004427	Inorganic pyrophosphatase	KOG1626
g820	contig_57	2373308	2374714	+	gi|255944963|ref|XP_002563249.1|	GO:0050660	tRNA-dihydrouridine(20) synthase [NAD(P)+]	KOG2334
g821	contig_57	2375335	2378682	-	gi|255944965|ref|XP_002563250.1|	GO:0005524	ATP-dependent helicase fft2	KOG0389
g822	contig_57	2379017	2379451	+	gi|425784293|gb|EKV22081.1|	-	Vacuolar ATPase assembly integral membrane protein VMA21
g823	contig_57	2379842	2380432	-	gi|255944969|ref|XP_002563252.1|	-	Cystathionine beta-synthase
g824	contig_57	2381330	2384040	+	gi|255944971|ref|XP_002563253.1|	-	Mitochondrial phosphate carrier protein 2	KOG0767
g825	contig_57	2384701	2386081	-	gi|255944975|ref|XP_002563255.1|	-	Uncharacterized protein C19C7.04c
g826	contig_57	2387946	2389403	-	gi|584413510|emb|CDM32284.1|	-	UNC93-like protein 1_x0001_sp|Q8LG53.2|UN932_ARATH RecName: Full=UNC93-like protein 2	KOG3098
g827	contig_57	2390840	2392041	-	gi|425784254|gb|EKV22043.1|	GO:0008810	Xyloglucan-specific endo-beta-1,4-glucanase A
g828	contig_57	2392730	2395092	+	gi|255944981|ref|XP_002563258.1|	-	Cellulose synthase catalytic subunit [UDP-forming]
g829	contig_57	2400296	2400662	+	gi|400600784|gb|EJP68452.1|	-	-	-
g830	contig_57	2401713	2403755	-	gi|169783960|ref|XP_001826442.1|	-	Uncharacterized transporter C417.10	KOG2533
g831	contig_57	2405263	2406471	+	gi|425778521|gb|EKV16646.1|	GO:0008270	Positive regulator of purine utilization
g832	contig_57	2407079	2409694	-	gi|425778520|gb|EKV16645.1|	-	Anaphase-promoting complex subunit 5	KOG4322
g833	contig_57	2409867	2410953	+	gi|425778519|gb|EKV16644.1|	GO:0004639	Phosphoribosylaminoimidazole-succinocarboxamide synthase	KOG2835
g834	contig_57	2411143	2412292	-	gi|255944993|ref|XP_002563264.1|	-	Complex I intermediate-associated protein 30, mitochondrial
g835	contig_57	2413221	2416391	+	gi|255944997|ref|XP_002563266.1|	GO:0003676	-	-
g836	contig_57	2417368	2418460	+	gi|255943605|ref|XP_002562570.1|	-	-	-
g837	contig_57	2419350	2424312	-	gi|425778514|gb|EKV16639.1|	GO:0016455	Mediator of RNA polymerase II transcription subunit 12	KOG4522
g838	contig_57	2425307	2426066	+	gi|584413524|emb|CDM32298.1|	-	Uncharacterized protein YPR063C
g839	contig_57	2426545	2427315	+	gi|115402627|ref|XP_001217390.1|	GO:0003743	Eukaryotic translation initiation factor eIF-1	KOG1770
g840	contig_57	2429934	2431100	+	gi|255945009|ref|XP_002563272.1|	-	-	-
g841	contig_57	2432100	2436894	-	gi|584413528|emb|CDM32302.1|	-	RHO GTPase-activating protein RGD1	KOG1450
g842	contig_57	2439089	2441012	+	gi|584413531|emb|CDM32305.1|	GO:0016491	Ras-related C3 botulinum toxin substrate 1	KOG0393
g843	contig_57	2441594	2442698	-	gi|584413532|emb|CDM32306.1|	GO:0003676	Uncharacterized RNA-binding protein C365.04c	KOG0118
g844	contig_57	2443064	2444108	-	gi|255945021|ref|XP_002563278.1|	GO:0008026	Uncharacterized protein C3orf26 homolog	KOG3089
g845	contig_57	2444399	2446020	+	gi|584413534|emb|CDM32308.1|	-	Centromere protein T
g846	contig_57	2446106	2447213	-	gi|255945025|ref|XP_002563280.1|	-	Cytochrome oxidase assembly protein shy1	KOG1563
g847	contig_57	2447450	2448987	+	gi|584413536|emb|CDM32310.1|	GO:0005515	-	-
g848	contig_57	2449471	2450141	-	gi|425778501|gb|EKV16626.1|	-	Mitochondrial intermembrane space cysteine motif-containing protein MIC17	KOG4090
g849	contig_57	2450598	2451375	-	gi|425778500|gb|EKV16625.1|	-	Nuclear nucleic acid-binding protein C1D	KOG4835
g850	contig_57	2451687	2453015	+	gi|255945033|ref|XP_002563284.1|	GO:0050661	Probable 2-dehydropantoate 2-reductase
g851	contig_57	2453120	2454689	-	gi|584413540|emb|CDM32314.1|	GO:0005515	SET domain-containing protein 4	KOG1337
g852	contig_57	2455047	2455959	+	gi|584413541|emb|CDM32315.1|	-	Ubiquinone biosynthesis protein coq4, mitochondrial	KOG3244
g853	contig_57	2456221	2456861	-	gi|525580402|gb|EPS26652.1|	GO:0003677	Programmed cell death protein 5
g854	contig_57	2458101	2460134	+	gi|425778495|gb|EKV16620.1|	-	Rab guanine nucleotide exchange factor sec2	KOG4324
g855	contig_57	2461116	2462777	-	gi|425778494|gb|EKV16619.1|	GO:0003723	Pre-mRNA-splicing factor sap114	KOG0007
g856	contig_57	2463456	2466543	+	gi|255945045|ref|XP_002563290.1|	GO:0000030	Dolichyl-phosphate-mannose--protein mannosyltransferase 1	KOG3359
g857	contig_57	2467009	2467799	-	gi|255945047|ref|XP_002563291.1|	-	Uncharacterized protein C3H7.08c
g858	contig_57	2469811	2471687	+	gi|255945049|ref|XP_002563292.1|	GO:0008270	Palmitoyltransferase erf2	KOG1311
g859	contig_57	2472438	2475021	+	gi|255945051|ref|XP_002563293.1|	GO:0005515	Histone-lysine N-methyltransferase ash1	KOG1083
g860	contig_57	2479055	2481240	-	gi|255945061|ref|XP_002563298.1|	-	-	-
g861	contig_57	2481863	2482559	-	gi|255945059|ref|XP_002563297.1|	-	LYR motif-containing protein 4	KOG3801
g862	contig_57	2483126	2484021	+	gi|255945057|ref|XP_002563296.1|	-	-	-
g863	contig_57	2485772	2488144	+	gi|255945055|ref|XP_002563295.1|	-	-	-
g864	contig_57	2488989	2491162	+	gi|584413549|emb|CDM32323.1|	GO:0016772	Sulfate adenylyltransferase	KOG0636
g865	contig_57	2491501	2493264	+	gi|255945065|ref|XP_002563300.1|	-	-	-
g866	contig_57	2494195	2494959	+	gi|121712339|ref|XP_001273781.1|	-	-	-
g867	contig_57	2495403	2498900	+	gi|425778485|gb|EKV16610.1|	GO:0016881	Ubiquitin-conjugating enzyme E2Q-like protein 1	KOG0897
g868	contig_57	2499689	2500445	-	gi|255945067|ref|XP_002563301.1|	GO:0004129	Cytochrome c oxidase subunit 6A, mitochondrial	KOG3469
g869	contig_57	2500715	2502950	+	gi|425906911|gb|AFY11135.1|	-	DNA-(apurinic or apyrimidinic site) lyase 2	KOG1294
g870	contig_57	2504248	2505396	+	gi|425906907|gb|AFY11133.1|	GO:0003677	Mating-type protein MAT-1
g871	contig_57	2506705	2510582	-	gi|255945073|ref|XP_002563304.1|	GO:0005543	Endocytosis protein end4	KOG0980
g872	contig_57	2511255	2514111	-	gi|584413561|emb|CDM32335.1|	-	Uncharacterized PH domain-containing protein YPR091C	KOG2238
g873	contig_57	2516209	2517050	-	gi|584413564|emb|CDM32338.1|	-	-	-
g874	contig_57	2517565	2519628	+	gi|255945079|ref|XP_002563307.1|	GO:0030234	Probable 26S proteasome regulatory subunit rpn3	KOG2581
g875	contig_57	2520149	2521556	+	gi|584413562|emb|CDM32336.1|	-	Probable hexaprenyl pyrophosphate synthase, mitochondrial	KOG0776
g876	contig_57	2522342	2524303	+	gi|255945085|ref|XP_002563310.1|	GO:0016986	Transcription initiation factor TFIID subunit 12	KOG1142
g877	contig_57	2526124	2528812	-	gi|255945087|ref|XP_002563311.1|	GO:0016307	Phosphatidylinositol 4-phosphate 5-kinase its3	KOG0229
g878	contig_57	2530874	2532128	-	gi|584413568|emb|CDM32342.1|	GO:0003677	Histone H1	KOG4012
g879	contig_57	2534541	2535953	-	gi|317374926|sp|Q0CBS0.2|FEN1_ASPTN	GO:0004518	Flap endonuclease 1	KOG2519
g880	contig_57	2536240	2538598	+	gi|255945093|ref|XP_002563314.1|	GO:0008270	Transcriptional activator of proteases prtT
g881	contig_57	2539074	2540519	+	gi|255945095|ref|XP_002563315.1|	GO:0016627	Glutaryl-CoA dehydrogenase, mitochondrial	KOG0138
g882	contig_57	2541027	2541822	+	gi|398396360|ref|XP_003851638.1|	GO:0016881	Ubiquitin-conjugating enzyme E2-16 kDa	KOG0417
g883	contig_57	2543328	2544479	+	gi|317141052|ref|XP_001817163.2|	-	-	-
g884	contig_57	2546935	2549111	-	gi|255945099|ref|XP_002563317.1|	-	-	-
g885	contig_57	2550536	2551631	-	gi|425778466|gb|EKV16591.1|	-	Ribosomal RNA small subunit methyltransferase NEP1	KOG3073
g886	contig_57	2553309	2554520	+	gi|255945107|ref|XP_002563321.1|	-	N-acetyltransferase eso1	KOG3014
g887	contig_57	2554645	2556115	+	gi|425778464|gb|EKV16589.1|	-	-	-
g888	contig_57	2557273	2558202	-	gi|584409932|emb|CDM33956.1|	-	-	-
g889	contig_57	2558898	2559836	+	gi|584413579|emb|CDM32353.1|	-	-	-
g890	contig_57	2560656	2562796	+	gi|255945113|ref|XP_002563324.1|	-	Eukaryotic translation initiation factor 2A	KOG2315
g891	contig_57	2564528	2566538	-	gi|255945117|ref|XP_002563326.1|	-	-	-
g892	contig_57	2566924	2573115	+	gi|255945115|ref|XP_002563325.1|	-	Negative regulator of mitosis	KOG1858
g893	contig_57	2573433	2574806	-	gi|425778458|gb|EKV16583.1|	-	RNA polymerase II-associated protein RBA50	KOG1894
g894	contig_57	2575854	2578150	+	gi|255945121|ref|XP_002563328.1|	-	Histone promoter control protein 2
g895	contig_57	2579070	2580861	-	gi|425784192|gb|EKV21984.1|	GO:0005524	Dual specificity protein kinase FUZ7	KOG0581
g896	contig_57	2581606	2586004	+	gi|425778643|gb|EKV16761.1|	-	Transcription elongation factor spt6	KOG1856
g897	contig_57	2586516	2589427	+	gi|255945129|ref|XP_002563332.1|	-	Oxysterol-binding protein homolog C23H4.01c	KOG1737
g898	contig_57	2589944	2591538	-	gi|584413587|emb|CDM32362.1|	-	Uncharacterized protein C20F10.03	KOG2842
g899	contig_57	2592082	2593336	-	gi|425778640|gb|EKV16758.1|	-	Exosome complex component rrp4	KOG3013
g900	contig_57	2593601	2594688	-	gi|255945135|ref|XP_002563335.1|	-	-	-
g901	contig_57	2594896	2595999	+	gi|255945137|ref|XP_002563336.1|	GO:0003676	Nucleolar protein 13	KOG4210
g902	contig_57	2596871	2598826	+	gi|584413591|emb|CDM32366.1|	-	-	-
g903	contig_57	2600576	2603112	+	gi|255945141|ref|XP_002563338.1|	GO:0008270	Next to BRCA1 gene 1 protein	KOG4351
g904	contig_57	2603590	2604961	+	gi|425778635|gb|EKV16753.1|	-	Serum paraoxonase/arylesterase 2
g905	contig_57	2607489	2611364	-	gi|255945145|ref|XP_002563340.1|	-	Nucleoporin pom152
g906	contig_57	2611778	2613243	+	gi|255945147|ref|XP_002563341.1|	GO:0004221	Ubiquitin carboxyl-terminal hydrolase isozyme L5	KOG2778
g907	contig_57	2613760	2615297	+	gi|425778632|gb|EKV16750.1|	-	Oxysterol-binding protein-like protein 1	KOG2210
g908	contig_57	2615762	2619603	-	gi|425778631|gb|EKV16749.1|	-	Condensin complex subunit 1	KOG0414
g909	contig_57	2620003	2621595	+	gi|255945155|ref|XP_002563345.1|	GO:0005524	Cell cycle serine/threonine-protein kinase hsk1	KOG1167
g910	contig_57	2621700	2622683	-	gi|584413600|emb|CDM32375.1|	-	Putative ubiquitin thioesterase otu1	KOG3288
g911	contig_57	2623274	2626055	+	gi|255945159|ref|XP_002563347.1|	GO:0005515	Chromatin structure-remodeling complex subunit RSC1	KOG1827
g912	contig_57	2627171	2627584	-	gi|358391778|gb|EHK41182.1|	-	-	-
g913	contig_57	2629982	2631718	-	gi|255945161|ref|XP_002563348.1|	GO:0008270	Protein cps3	KOG1039
g914	contig_57	2632196	2636106	-	gi|425784168|gb|EKV21961.1|	-	Chitin synthase regulatory factor 4	KOG1550
g915	contig_57	2636612	2640643	+	gi|425778625|gb|EKV16743.1|	GO:0005524	ATP-dependent RNA helicase chl1	KOG1133
g916	contig_57	2641167	2642311	-	gi|255945171|ref|XP_002563353.1|	-	-	-
g917	contig_57	2643044	2648556	+	gi|255945173|ref|XP_002563354.1|	GO:0035091	Phospholipase D1	KOG1329
g918	contig_57	2648839	2650455	-	gi|255945209|ref|XP_002563372.1|	-	PAP-associated domain-containing protein 5	KOG1906
g919	contig_57	2651149	2654079	+	gi|255945207|ref|XP_002563371.1|	GO:0003824	Trehalose-phosphatase	KOG1050
g920	contig_57	2654976	2656391	+	gi|584413628|emb|CDM32403.1|	-	Riboflavin transporter MCH5	KOG2504
g921	contig_57	2656820	2657686	+	gi|425778607|gb|EKV16725.1|	-	28 kDa heat- and acid-stable phosphoprotein	KOG3375
g922	contig_57	2658075	2659197	-	gi|584413626|emb|CDM32401.1|	-	Protein unc-50 homolog	KOG3012
g923	contig_57	2660315	2664463	+	gi|255945199|ref|XP_002563367.1|	GO:0005086	PH and SEC7 domain-containing protein C11E3.11c	KOG0929
g924	contig_57	2664986	2669673	+	gi|255945197|ref|XP_002563366.1|	-	Anucleate primary sterigmata protein B
g925	contig_57	2669937	2671006	-	gi|584413623|emb|CDM32398.1|	GO:0016763	Nicotinate-nucleotide pyrophosphorylase [carboxylating]	KOG3008
g926	contig_57	2672294	2673362	-	gi|255945193|ref|XP_002563364.1|	GO:0016853	Bifunctional protein gal10	KOG1371
g927	contig_57	2674406	2675409	-	gi|425778614|gb|EKV16732.1|	GO:0008270	Fluconazole resistance protein 1
g928	contig_57	2676966	2677837	-	gi|255945189|ref|XP_002563362.1|	-	Ras-like protein 1	KOG0395
g929	contig_57	2678520	2681344	+	gi|425778616|gb|EKV16734.1|	GO:0043565	White collar 1 protein
g930	contig_57	2681818	2683005	-	gi|255945185|ref|XP_002563360.1|	-	-	-
g931	contig_57	2683180	2686446	-	gi|255945183|ref|XP_002563359.1|	-	U3 small nucleolar RNA-associated protein 22	KOG2054
g932	contig_57	2686679	2688682	+	gi|255945181|ref|XP_002563358.1|	GO:0030170	Cystathionine gamma-synthase	KOG0053
g933	contig_57	2689064	2690056	-	gi|425778620|gb|EKV16738.1|	-	-	-
g934	contig_57	2690453	2691049	+	gi|255945177|ref|XP_002563356.1|	-	54S ribosomal protein L20, mitochondrial
g935	contig_57	2691444	2693221	+	gi|255945175|ref|XP_002563355.1|	GO:0016787	Cys-Gly metallodipeptidase dug1	KOG2276
g936	contig_57	2693614	2697642	+	gi|255945211|ref|XP_002563373.1|	GO:0005524	Structural maintenance of chromosomes protein 6	KOG0250
g937	contig_57	2698503	2700199	+	gi|425778602|gb|EKV16720.1|	GO:0008026	ATP-dependent RNA helicase dhh1	KOG0326
g938	contig_57	2701312	2702644	+	gi|255945215|ref|XP_002563375.1|	-	Uncharacterized mitochondrial carrier C19G12.05	KOG0756
g939	contig_57	2702747	2704025	-	gi|255945217|ref|XP_002563376.1|	GO:0016149	Putative peptide chain release factor 1, mitochondrial	KOG2726
g940	contig_57	2704431	2706045	+	gi|255945219|ref|XP_002563377.1|	GO:0031072	DnaJ homolog subfamily C member 3	KOG0624
g941	contig_57	2706363	2707127	-	gi|255945221|ref|XP_002563378.1|	GO:0004719	Protein-L-isoaspartate(D-aspartate) O-methyltransferase	KOG1661
g942	contig_57	2707585	2708370	+	gi|255945223|ref|XP_002563379.1|	-	-	-
g943	contig_57	2708787	2710780	-	gi|584413638|emb|CDM32414.1|	GO:0008415	Probable dihydrolipoyllysine-residue succinyltransferase component of 2-oxoglutarate dehydrogenase complex, mitochondrial	KOG0559
g944	contig_57	2711168	2711634	+	gi|255945227|ref|XP_002563381.1|	-	NADH dehydrogenase [ubiquinone] 1 beta subcomplex subunit 9
g945	contig_57	2712125	2712624	-	gi|67526021|ref|XP_661072.1|	GO:0003677	Histone H2A	KOG1756
g946	contig_57	2713191	2713754	+	gi|255945231|ref|XP_002563383.1|	GO:0003677	Histone H2B	KOG1744
g947	contig_57	2714120	2714679	-	gi|255945233|ref|XP_002563384.1|	-	Probable cysteine protease atg4	KOG2674
g948	contig_57	2716061	2718036	+	gi|584413643|emb|CDM32419.1|	GO:0003676	Protein SQS1	KOG0154
g949	contig_57	2718208	2719878	-	gi|584413644|emb|CDM32420.1|	GO:0031072	DnaJ homolog subfamily C member 21	KOG0717
g950	contig_57	2720178	2722094	+	gi|584413645|emb|CDM32421.1|	-	F-box only protein 21
g951	contig_57	2757594	2761082	-	gi|584413678|emb|CDM32454.1|	GO:0005515	TPR repeat protein oca3	KOG3060
g952	contig_57	2761664	2764509	+	gi|255945253|ref|XP_002563394.1|	-	AP-3 complex subunit delta	KOG1059
g953	contig_57	2764761	2765102	-	gi|255945255|ref|XP_002563395.1|	-	-	-
g954	contig_57	2765652	2769301	-	gi|584413681|emb|CDM32457.1|	GO:0042578	Inositol-1,4,5-trisphosphate 5-phosphatase 1	KOG0566
g955	contig_57	2769649	2770600	+	gi|255945259|ref|XP_002563397.1|	GO:0003676	Protein pxr1	KOG2809
g956	contig_57	2772251	2774305	+	gi|584413700|emb|CDM32476.1|	GO:0008270	Uncharacterized transcriptional regulatory protein C3C7.04
g957	contig_57	2775315	2778825	-	gi|255945299|ref|XP_002563417.1|	GO:0043130	Actin cytoskeleton-regulatory complex protein sla1	KOG1029
g958	contig_57	2779469	2781043	-	gi|255945297|ref|XP_002563416.1|	-	Protein OS-9 homolog	KOG3394
g959	contig_57	2781892	2783001	+	gi|584413697|emb|CDM32473.1|	-	Pirin
g960	contig_57	2783363	2785403	-	gi|255945293|ref|XP_002563414.1|	-	DNA repair protein rhp7	KOG1947
g961	contig_57	2785964	2789198	+	gi|255945291|ref|XP_002563413.1|	GO:0005524	DNA repair protein RAD16	KOG1002
g962	contig_57	2789602	2791483	+	gi|425779428|gb|EKV17489.1|	GO:0005515	-	-
g963	contig_57	2792032	2795631	+	gi|255945287|ref|XP_002563411.1|	GO:0008270	Protein csx2	KOG0521
g964	contig_57	2799464	2801414	+	gi|584413692|emb|CDM32468.1|	GO:0003676	Zinc finger CCCH domain-containing protein 45	KOG1902
g965	contig_57	2802051	2802770	+	gi|255945279|ref|XP_002563407.1|	-	-	-
g966	contig_57	2803221	2805141	-	gi|584413690|emb|CDM32466.1|	GO:0022857	High-affinity fructose transporter ght6	KOG0254
g967	contig_57	2805814	2812042	-	gi|255945275|ref|XP_002563405.1|	GO:0016773	Phosphatidylinositol 4-kinase stt4	KOG0902
g968	contig_57	2812544	2814700	+	gi|255945273|ref|XP_002563404.1|	GO:0005524	Probable serine/threonine-protein kinase fhkC	KOG0615
g969	contig_57	2815186	2816914	+	gi|584413687|emb|CDM32463.1|	GO:0020037	Eburicol 14-alpha-demethylase	KOG0684
g970	contig_57	2817298	2818029	-	gi|255945269|ref|XP_002563402.1|	-	Protein FYV4, mitochondrial
g971	contig_57	2818449	2819712	+	gi|255945267|ref|XP_002563401.1|	GO:0005524	Serine/threonine-protein kinase KIN28	KOG0659
g972	contig_57	2821159	2824108	+	gi|255945263|ref|XP_002563399.1|	GO:0005524	Kinesin-related protein 11	KOG0242
g973	contig_57	2824310	2825474	-	gi|425779417|gb|EKV17478.1|	GO:0016747	Diacylglycerol O-acyltransferase 2A	KOG0831
g974	contig_57	2825831	2827095	-	gi|317145560|ref|XP_003189716.1|	-	Phosphosulfolactate synthase
g975	contig_57	2828591	2830077	+	gi|584413703|emb|CDM32479.1|	-	-	-
g976	contig_57	2831677	2833723	+	gi|255945309|ref|XP_002563422.1|	-	PWWP domain-containing protein 1
g977	contig_57	2834631	2836064	-	gi|255945311|ref|XP_002563423.1|	GO:0003824	Protein phosphatase 2C homolog 7, mitochondrial	KOG1379
g978	contig_57	2836504	2838257	+	gi|255945313|ref|XP_002563424.1|	-	U4/U6 small nuclear ribonucleoprotein Prp4	KOG0272
g979	contig_57	2838689	2839519	+	gi|584413707|emb|CDM32483.1|	GO:0031072	J-type co-chaperone JAC1, mitochondrial	KOG3192
g980	contig_57	2840550	2842267	+	gi|255945317|ref|XP_002563426.1|	-	-	-
g981	contig_57	2844024	2845238	+	gi|584413709|emb|CDM32485.1|	-	Malic acid transport protein
g982	contig_57	2846606	2847817	-	gi|584413711|emb|CDM32487.1|	-	RNA 3'-terminal phosphate cyclase-like protein	KOG3980
g983	contig_57	2848028	2848720	+	gi|255945323|ref|XP_002563429.1|	GO:0005506	3-hydroxyanthranilate 3,4-dioxygenase 1	KOG3995
g984	contig_57	2849177	2851132	-	gi|255945325|ref|XP_002563430.1|	-	Tip elongation protein 1	KOG4568
g985	contig_57	2851580	2852966	+	gi|255945327|ref|XP_002563431.1|	GO:0005524	Serine/threonine-protein kinase ppk13	KOG2345
g986	contig_57	2853293	2854579	+	gi|584413715|emb|CDM32491.1|	GO:0016491	WW domain-containing oxidoreductase
g987	contig_57	2856211	2857848	+	gi|584413716|emb|CDM32492.1|	-	Uncharacterized MFS-type transporter C1271.10c	KOG0255
g988	contig_57	2857970	2858986	-	gi|255945333|ref|XP_002563434.1|	GO:0004553	Xylosidase/arabinosidase
g989	contig_57	2859338	2859982	-	gi|255945335|ref|XP_002563435.1|	-	-	-
g990	contig_57	2860396	2862640	-	gi|425779385|gb|EKV17449.1|	GO:0008236	Dipeptidyl-peptidase 5	KOG2100
g991	contig_57	2862988	2869652	-	gi|425779386|gb|EKV17450.1|	GO:0008026	Pre-mRNA-splicing factor brr2	KOG0951
g992	contig_57	2870077	2873100	+	gi|255945341|ref|XP_002563438.1|	GO:0030983	MutS protein homolog 1	KOG0217
g993	contig_57	2873277	2874077	-	gi|255945343|ref|XP_002563439.1|	GO:0004848	Ureidoglycolate hydrolase
g994	contig_57	2878853	2879849	-	gi|425779391|gb|EKV17455.1|	GO:0004540	Probable ribonuclease P protein subunit 3	KOG2363
g995	contig_57	2880237	2881455	+	gi|255945351|ref|XP_002563443.1|	GO:0005524	Casein kinase II subunit alpha	KOG0668
g996	contig_57	2882657	2885990	+	gi|425779393|gb|EKV17457.1|	GO:0005524	Valine--tRNA ligase, mitochondrial	KOG0432
g997	contig_57	2886851	2887911	+	gi|425782079|gb|EKV20009.1|	-	Ribosome production factor 2 homolog	KOG3031
g998	contig_57	2888095	2889309	+	gi|584413747|emb|CDM32523.1|	-	Peroxisomal membrane protein 4
g999	contig_57	2889877	2891970	-	gi|425782081|gb|EKV20011.1|	-	-	-
g1000	contig_57	2892948	2894171	-	gi|425782082|gb|EKV20012.1|	-	-	-
g1001	contig_57	2894979	2897381	-	gi|425782083|gb|EKV20013.1|	-	E3 ubiquitin-protein ligase HRD1	KOG0802
g1002	contig_57	2898043	2899768	+	gi|584413751|emb|CDM32527.1|	-	-	-
g1003	contig_57	2900660	2901496	+	gi|255945437|ref|XP_002563486.1|	-	-	-
g1004	contig_57	2902506	2905931	-	gi|255945441|ref|XP_002563488.1|	GO:0020037	Isotrichodermin C-15 hydroxylase	KOG0158
g1005	contig_57	2907234	2908875	-	gi|425781970|gb|EKV19903.1|	GO:0005515	COP9 signalosome complex subunit 1	KOG0686
g1006	contig_57	2909528	2910708	+	gi|255945447|ref|XP_002563491.1|	GO:0016491	Hydroxysteroid dehydrogenase-like protein 2	KOG0725
g1007	contig_57	2911038	2911723	-	gi|425781972|gb|EKV19905.1|	-	-	-
g1008	contig_57	2913089	2914151	+	gi|255945453|ref|XP_002563494.1|	GO:0035091	PX domain-containing protein YPT35
g1009	contig_57	2914615	2916300	-	gi|255945455|ref|XP_002563495.1|	-	Lysylphosphatidylglycerol biosynthesis bifunctional protein LysX
g1010	contig_57	2917310	2918721	-	gi|584414087|emb|CDM32863.1|	-	-	-
g1011	contig_57	2919102	2919830	+	gi|255945459|ref|XP_002563497.1|	-	-	-
g1012	contig_57	2920044	2920973	-	gi|358365335|dbj|GAA81957.1|	-	-	-
g1013	contig_57	2922610	2926485	+	gi|584414091|emb|CDM32867.1|	-	Choline transport protein	KOG1289
g1014	contig_57	2926996	2931614	+	gi|584414093|emb|CDM32869.1|	GO:0003824	Probable succinyl-CoA ligase [GDP-forming] subunit beta, mitochondrial	KOG0498
g1015	contig_57	2932597	2933281	+	gi|425781925|gb|EKV19859.1|	-	-	-
g1016	contig_57	2933408	2934598	-	gi|255945477|ref|XP_002563506.1|	-	Severin	KOG0443
g1017	contig_57	2935274	2936139	-	gi|530475001|gb|EQB55145.1|	GO:0005375	-	-
g1018	contig_57	2936761	2938810	+	gi|596690128|ref|XP_007280565.1|	GO:0050660	Ferric/cupric reductase transmembrane component 7	KOG0039
g1019	contig_57	2941011	2941978	+	gi|302896180|ref|XP_003046970.1|	-	Isoflavone reductase homolog P3
g1020	contig_57	2943887	2946416	-	gi|584409408|emb|CDM33431.1|	-	-	-
g1021	contig_57	2950934	2951767	-	-	-	-	-
g1022	contig_57	2954010	2955098	+	gi|425781250|gb|EKV19226.1|	-	Initiation-specific alpha-1,6-mannosyltransferase
g1023	contig_57	2956668	2958586	+	gi|584416056|emb|CDM27754.1|	GO:0050660	Choline dehydrogenase	KOG1238
g1024	contig_57	2964580	2965605	-	gi|557727868|dbj|GAD93583.1|	GO:0016491	Uncharacterized oxidoreductase C663.08c	KOG1611
g1025	contig_57	2966771	2968326	+	gi|255933626|ref|XP_002558192.1|	GO:0050660	Choline dehydrogenase	KOG1238
g1026	contig_57	2971147	2973059	-	gi|525584745|gb|EPS30995.1|	-	-	-
g1027	contig_57	2976275	2977825	-	gi|317033731|ref|XP_001395375.2|	-	-	-
g1028	contig_57	2979288	2979512	-	gi|255940216|ref|XP_002560877.1|	-	-	-
g1029	contig_57	2986695	2987369	-	gi|598042567|ref|XP_007350656.1|	-	Albumin-2
g1030	contig_57	2992090	2993466	-	gi|599151562|gb|EYE90990.1|	-	Uncharacterized protein C757.02c
g1031	contig_57	2996910	2997946	+	gi|584413471|emb|CDM32243.1|	GO:0016491	WW domain-containing oxidoreductase	KOG1208
g1032	contig_57	3000811	3004461	-	gi|350631590|gb|EHA19961.1|	GO:0020037	Ent-kaurene oxidase	KOG0158
g1033	contig_57	3021937	3022374	+	-	-	-	-
g1034	contig_57	3025041	3026792	-	gi|584415970|emb|CDM27668.1|	GO:0050660	Choline dehydrogenase	KOG1238
g1035	contig_57	3028478	3030546	+	gi|317143587|ref|XP_001819566.2|	GO:0020037	Catalase	KOG0047
g1036	contig_57	3031109	3032298	+	gi|584415969|emb|CDM27667.1|	-	-	-
g1037	contig_57	3032972	3033274	-	gi|584415972|emb|CDM27670.1|	-	-	-
g1038	contig_57	3035416	3036258	-	gi|525583264|gb|EPS29514.1|	-	-	-
g1039	contig_57	3039569	3041256	-	gi|557728832|dbj|GAD92596.1|	-	Levanase	KOG0228
g1040	contig_57	3042311	3044064	+	gi|255945607|ref|XP_002563571.1|	GO:0022857	Probable glucose transporter rco-3	KOG0254
g1041	contig_57	3045251	3046258	+	gi|255943516|ref|XP_002562526.1|	GO:0050662	UDP-glucose 4-epimerase
g1042	contig_57	3047010	3054373	-	gi|398397937|ref|XP_003852426.1|	GO:0043169	Cell wall alpha-1,3-glucan synthase mok13
g1043	contig_57	3056609	3058326	+	gi|169763398|ref|XP_001727599.1|	-	Benomyl/methotrexate resistance protein	KOG0255
g1044	contig_57	3059079	3060383	+	gi|584411590|emb|CDM30353.1|	GO:0016491	Alpha-ketoglutarate-dependent sulfonate dioxygenase
g1045	contig_57	3061002	3062922	-	gi|255951984|ref|XP_002566758.1|	-	Uncharacterized transporter YIL166C	KOG2533
g1046	contig_57	3064020	3064992	-	gi|134080486|emb|CAK46334.1|	-	-	-
g1047	contig_57	3065520	3066486	-	gi|358370988|dbj|GAA87597.1|	-	-	-
g1048	contig_57	3067261	3074148	+	gi|134080488|emb|CAK46336.1|	GO:0048037	Nonribosomal peptide synthetase 14	KOG1202
g1049	contig_57	3074467	3076098	-	gi|322701981|gb|EFY93729.1|	-	Beta-fructosidase	KOG0228
g1050	contig_57	3078405	3079643	+	gi|255935211|ref|XP_002558632.1|	GO:0030170	-	-
g1051	contig_57	3080888	3086051	+	gi|584414112|emb|CDM32888.1|	-	Monocarboxylate transporter 8	KOG2504
g1052	contig_57	3086488	3087718	+	gi|212527444|ref|XP_002143879.1|	-	-	-
g1053	contig_57	3087833	3088424	-	gi|212527442|ref|XP_002143878.1|	-	-	-
g1054	contig_57	3088858	3090570	-	gi|255945499|ref|XP_002563517.1|	GO:0004185	Carboxypeptidase cpdS	KOG1282
g1055	contig_57	3092672	3093483	-	gi|255945501|ref|XP_002563518.1|	-	-	-
g1056	contig_57	3095078	3095560	-	-	-	-	-
g1057	contig_57	3097180	3099048	+	gi|255945507|ref|XP_002563521.1|	-	Putative U6 snRNA phosphodiesterase	KOG3102
g1058	contig_57	3099893	3101434	-	gi|159125896|gb|EDP51012.1|	-	-	-
g1059	contig_57	3102079	3103835	-	gi|255945511|ref|XP_002563523.1|	-	N amino acid transport system protein
g1060	contig_57	3105162	3109391	-	gi|255945517|ref|XP_002563526.1|	-	-	-
g1061	contig_57	3110189	3111133	+	gi|255945519|ref|XP_002563527.1|	GO:0016829	Probable 4-hydroxy-2-oxoglutarate aldolase, mitochondrial
g1062	contig_57	3111534	3113318	+	gi|584414124|emb|CDM32900.1|	GO:0004563	Beta-hexosaminidase	KOG2499
g1063	contig_57	3123965	3125920	+	gi|255945527|ref|XP_002563531.1|	-	Zinc finger protein PLAG1
g1064	contig_57	3126422	3127555	+	gi|255945529|ref|XP_002563532.1|	GO:0003877	5',5'''-P-1,P-4-tetraphosphate phosphorylase 2
g1065	contig_57	3127808	3128941	-	gi|584414131|emb|CDM32907.1|	GO:0048037	Glyoxylate reductase 1	KOG0069
g1066	contig_57	3130239	3131687	-	gi|255945537|ref|XP_002563536.1|	-	-	-
g1067	contig_57	3135619	3136122	+	-	-	-	-
g1068	contig_57	3136897	3138174	-	gi|584414136|emb|CDM32912.1|	-	-	-
g1069	contig_57	3138353	3138857	+	gi|255945545|ref|XP_002563540.1|	-	Small nuclear ribonucleoprotein G	KOG1780
g1070	contig_57	3139294	3143107	-	gi|255945547|ref|XP_002563541.1|	-	Transcription initiation factor TFIID subunit 2	KOG1932
g1071	contig_57	3143652	3145214	+	gi|584414139|emb|CDM32915.1|	GO:0016780	Uncharacterized CDP-alcohol phosphatidyltransferase class-I family protein C22A12.10	KOG2877
g1072	contig_57	3145688	3149233	-	gi|584414140|emb|CDM32916.1|	-	-	-
g1073	contig_57	3153022	3154081	-	gi|425767971|gb|EKV06521.1|	-	-	-
g1074	contig_57	3154890	3157383	-	gi|584408220|emb|CDM35127.1|	GO:0050660	Alcohol oxidase	KOG1238
g1075	contig_57	3162710	3165332	+	gi|358368145|dbj|GAA84762.1|	-	-	-
g1076	contig_57	3168626	3169480	-	gi|477521380|gb|ENH73496.1|	GO:0016491	Uncharacterized oxidoreductase C736.13	KOG1208
g1077	contig_57	3171623	3172719	-	gi|119473989|ref|XP_001258870.1|	GO:0016491	Sorbitol dehydrogenase	KOG1205
g1078	contig_57	3173502	3175061	+	gi|590044365|gb|EXK46223.1|	GO:0016491	Uncharacterized oxidoreductase C736.13	KOG1208
g1079	contig_57	3176617	3178687	-	gi|157382494|gb|ABV48737.1|	GO:0046873	-	-
g1080	contig_57	3179321	3180628	+	gi|584414834|emb|CDM26524.1|	-	-	-
g1081	contig_57	3182129	3183975	-	gi|255940182|ref|XP_002560860.1|	-	Beta-lactamase
g1082	contig_57	3184955	3185762	-	gi|429961379|gb|ELA40924.1|	GO:0004826	-	-
g1083	contig_57	3186074	3188867	-	gi|584414219|emb|CDM32996.1|	-	Fusicoccadiene synthase	KOG0777
g1084	contig_57	3190333	3192044	+	gi|255945617|ref|XP_002563576.1|	GO:0020037	Trichodiene oxygenase	KOG0156
g1085	contig_57	3192968	3197451	-	gi|425774042|gb|EKV12365.1|	GO:0008270	Uncharacterized protein XCC2094
g1086	contig_57	3197652	3202022	+	gi|255945621|ref|XP_002563578.1|	GO:0050660	Endoplasmic oxidoreductin-1	KOG2608
g1087	contig_57	3202974	3204290	+	gi|255945623|ref|XP_002563579.1|	-	Peroxisomal membrane protein PAS20	KOG3875
g1088	contig_57	3206782	3208280	-	gi|255945625|ref|XP_002563580.1|	-	-	-
g1089	contig_57	3209881	3211465	-	gi|584414232|emb|CDM33009.1|	-	Vacuolar protein sorting-associated protein atg6	KOG2751
g1090	contig_57	3211653	3213338	+	gi|255945629|ref|XP_002563582.1|	-	-	-
g1091	contig_57	3213705	3215228	-	gi|425767933|gb|EKV06483.1|	GO:0030170	Cysteine synthase 2	KOG1481
g1092	contig_57	3215519	3217101	+	gi|255945633|ref|XP_002563584.1|	-	NADH dehydrogenase [ubiquinone] complex I, assembly factor 7 homolog
g1093	contig_57	3219427	3219636	+	-	-	-	-
g1094	contig_57	3220063	3222134	+	gi|255945671|ref|XP_002563603.1|	GO:0016884	Putative amidase PB8B6.03	KOG1212
g1095	contig_57	3222363	3224403	-	gi|255945673|ref|XP_002563604.1|	GO:0005515	Peroxisomal targeting signal receptor	KOG1125
g1096	contig_57	3224695	3229101	-	gi|584414242|emb|CDM33019.1|	GO:0008270	Uncharacterized transcriptional regulatory protein C139.03
g1097	contig_57	3230261	3236795	+	gi|425765813|gb|EKV04461.1|	GO:0005515	Protein argonaute 5	KOG1041
g1098	contig_57	3237251	3238883	-	gi|425765812|gb|EKV04460.1|	-	-	-
g1099	contig_57	3239594	3240224	-	gi|425765811|gb|EKV04459.1|	GO:0003899	DNA-directed RNA polymerase II subunit rpb7	KOG3298
g1100	contig_57	3241324	3242123	+	gi|584414247|emb|CDM33024.1|	-	Uncharacterized endoplasmic reticulum membrane protein C16E8.02	KOG3292
g1101	contig_57	3242916	3245020	+	gi|425765809|gb|EKV04457.1|	GO:0046961	ATP synthase subunit alpha, mitochondrial	KOG1353
g1102	contig_57	3245759	3247053	+	gi|255931329|ref|XP_002557221.1|	GO:0003824	Methylenetetrahydrofolate dehydrogenase [NAD(+)]	KOG0089
g1103	contig_57	3248784	3249474	-	gi|255931325|ref|XP_002557219.1|	GO:0008233	Signal peptidase complex subunit SPC2
g1104	contig_57	3249728	3250779	+	gi|584414252|emb|CDM33029.1|	-	ER membrane protein complex subunit 3	KOG3188
g1105	contig_57	3250971	3251707	-	gi|584414253|emb|CDM33030.1|	-	FAS1 domain-containing protein AFUA_8G05360
g1106	contig_57	3251882	3255367	+	gi|255931319|ref|XP_002557216.1|	-	DNA repair/transcription protein mms19	KOG1967
g1107	contig_57	3257587	3259020	+	gi|317031884|ref|XP_001393612.2|	-	-	-
g1108	contig_57	3260666	3261744	-	gi|255931311|ref|XP_002557212.1|	-	-	-
g1109	contig_57	3262401	3263134	-	gi|255931309|ref|XP_002557211.1|	-	-	-
g1110	contig_57	3264407	3266147	-	gi|425765800|gb|EKV04448.1|	-	Uncharacterized protein C1604.06c	KOG2154
g1111	contig_57	3266339	3267242	+	gi|255931307|ref|XP_002557210.1|	GO:0015078	ATP synthase subunit 4, mitochondrial	KOG3976
g1112	contig_57	3267940	3269372	+	gi|255931305|ref|XP_002557209.1|	-	Protein DSF2
g1113	contig_57	3269587	3271035	-	gi|255931303|ref|XP_002557208.1|	GO:0022857	Lactose permease	KOG0254
g1114	contig_57	3271798	3272456	-	gi|255931299|ref|XP_002557206.1|	-	Bypass of stop codon protein 6
g1115	contig_57	3275612	3276676	-	gi|255931257|ref|XP_002557185.1|	GO:0046873	Zinc-regulated transporter 1	KOG1558
g1116	contig_57	3278448	3280353	-	gi|121719908|ref|XP_001276652.1|	GO:0046983	-	-
g1117	contig_57	3283854	3285396	-	gi|255931263|ref|XP_002557188.1|	GO:0008270	Zinc finger CCCH domain-containing protein C337.12	KOG1492
g1118	contig_57	3288996	3290249	+	gi|584414288|emb|CDM33065.1|	GO:0005524	Transcription initiation factor IIF subunit beta	KOG2905
g1119	contig_57	3290679	3291947	+	gi|584414282|emb|CDM33059.1|	GO:0005515	COP9 signalosome complex subunit 4	KOG1497
g1120	contig_57	3292586	3293741	-	gi|584414281|emb|CDM33058.1|	-	-	-
g1121	contig_57	3295447	3297154	+	gi|584414280|emb|CDM33057.1|	GO:0016491	Vanillin dehydrogenase	KOG2451
g1122	contig_57	3298220	3300192	+	gi|425765789|gb|EKV04437.1|	GO:0020037	Putative fumarate reductase	KOG2404
g1123	contig_57	3300912	3302141	-	gi|255931279|ref|XP_002557196.1|	-	-	-
g1124	contig_57	3303358	3305046	+	gi|425783917|gb|EKV21733.1|	-	Protein phosphatase PP2A regulatory subunit B	KOG1354
g1125	contig_57	3305988	3311185	+	gi|584414276|emb|CDM33053.1|	-	Paired amphipathic helix protein pst1	KOG4204
g1126	contig_57	3312657	3314336	+	gi|525585239|gb|EPS31489.1|	GO:0003824	Acetyl-CoA hydrolase	KOG2828
g1127	contig_57	3315222	3315589	-	gi|425765794|gb|EKV04442.1|	-	-	-
g1128	contig_57	3319543	3321261	+	gi|255931291|ref|XP_002557202.1|	-	Probable beta-glucosidase btgE
g1129	contig_57	3325174	3326427	+	gi|315049309|ref|XP_003174029.1|	-	-	-
g1130	contig_57	3326601	3328034	+	gi|525585229|gb|EPS31479.1|	-	-	-
g1131	contig_57	3328162	3329432	-	gi|584405900|emb|CDM38482.1|	-	Uncharacterized protein C800.11	KOG2938
g1132	contig_57	3330124	3331962	+	gi|255931237|ref|XP_002557175.1|	GO:0022857	Probable quinate permease	KOG0254
g1133	contig_57	3332364	3334307	+	gi|525585226|gb|EPS31476.1|	GO:0008270	Transcriptional regulatory protein moc3
g1134	contig_57	3334375	3335409	-	gi|425765772|gb|EKV04420.1|	-	Putative ribokinase	KOG2855
g1135	contig_57	3336202	3338139	-	gi|584407413|emb|CDM36237.1|	GO:0050660	Choline dehydrogenase	KOG1238
g1136	contig_57	3340485	3341783	+	gi|296806383|ref|XP_002844001.1|	GO:0020037	Acyl-CoA desaturase	KOG0537
g1137	contig_57	3342005	3350153	-	gi|315039803|ref|XP_003169279.1|	GO:0016491	Lovastatin nonaketide synthase	KOG1178
g1138	contig_57	3352343	3361570	-	gi|599152268|gb|EYE91651.1|	GO:0016491	Lovastatin nonaketide synthase	KOG1178
g1139	contig_57	3362428	3363091	+	-	-	-	-
g1140	contig_57	3368229	3369411	+	gi|255954657|ref|XP_002568081.1|	GO:0016491	Alcohol dehydrogenase	KOG0024
g1141	contig_57	3370215	3371901	-	gi|573053953|gb|ETS73912.1|	GO:0004190	-	-
g1142	contig_57	3372807	3374289	+	gi|500257101|gb|EOO00295.1|	-	-	-
g1143	contig_57	3375560	3377049	+	gi|584406618|emb|CDM37828.1|	GO:0016740	Probable squalene synthase	KOG1459
g1144	contig_57	3378843	3384139	+	gi|525584971|gb|EPS31221.1|	GO:0008270	Uncharacterized MFS-type transporter C1271.10c	KOG0255
g1145	contig_57	3384429	3386207	-	gi|590053502|gb|EXK81026.1|	GO:0008239	Cocaine esterase
g1146	contig_57	3386845	3387858	+	gi|115387281|ref|XP_001211146.1|	-	-	-
g1147	contig_57	3388468	3389343	-	gi|584407040|emb|CDM37348.1|	-	-	-
g1148	contig_57	3389750	3390760	-	gi|525583143|gb|EPS29393.1|	-	-	-
g1149	contig_57	3391970	3394787	-	gi|159122071|gb|EDP47194.1|	-	-	-
g1150	contig_57	3395222	3396787	-	gi|525580001|gb|EPS26251.1|	-	Drug resistance protein YOR378W	KOG0254
g1151	contig_57	3397441	3398487	-	gi|255937035|ref|XP_002559544.1|	GO:0016491	-	-
g1152	contig_57	3400318	3401247	-	gi|599151454|gb|EYE90889.1|	-	-	-
g1153	contig_57	3401553	3403152	+	gi|357528810|sp|Q5B948.2|IF4A_EMENI	GO:0008026	ATP-dependent RNA helicase eIF4A	KOG0327
g1154	contig_57	3404080	3406342	-	gi|425765771|gb|EKV04419.1|	GO:0003950	Poly [ADP-ribose] polymerase 2	KOG1037
g1155	contig_57	3409454	3410498	-	gi|557721059|dbj|GAE00074.1|	-	-	-
g1156	contig_57	3415011	3417358	+	gi|317157840|ref|XP_001826592.2|	GO:0016887	Putative white-brown complex homolog protein 30
g1157	contig_57	3418361	3419365	-	gi|302884027|ref|XP_003040911.1|	GO:0016491	Short-chain dehydrogenase TIC 32, chloroplastic	KOG1208
g1158	contig_57	3420898	3425667	+	gi|255931189|ref|XP_002557151.1|	GO:0008270	Probable HECT-type ubiquitin ligase-interacting protein creD	KOG3780
g1159	contig_57	3425844	3427235	-	gi|584414298|emb|CDM33075.1|	-	-	-
g1160	contig_57	3429028	3431191	-	gi|255931187|ref|XP_002557150.1|	-	Protein SKT5	KOG1550
g1161	contig_57	3433558	3437245	+	gi|255931183|ref|XP_002557148.1|	GO:0020037	Chitin synthase D	KOG2571
g1162	contig_57	3438576	3440825	+	gi|255931181|ref|XP_002557147.1|	-	Uncharacterized WD repeat-containing protein C2A9.03	KOG4532
g1163	contig_57	3441381	3442196	+	gi|525585214|gb|EPS31464.1|	-	-	-
g1164	contig_57	3442551	3446533	-	gi|255931173|ref|XP_002557143.1|	GO:0005524	Myosin-1	KOG0162
g1165	contig_57	3447427	3448319	-	gi|425765823|gb|EKV04470.1|	-	OPA3-like protein	KOG3335
g1166	contig_57	3448998	3450810	+	gi|255931163|ref|XP_002557138.1|	-	Dicarboxylic amino acid permease	KOG1286
g1167	contig_57	3451321	3452614	+	gi|169764711|ref|XP_001816827.1|	GO:0016491	Zinc-binding alcohol dehydrogenase domain-containing protein cipB	KOG1198
g1168	contig_57	3453718	3457168	+	gi|255931159|ref|XP_002557136.1|	GO:0005524	Cell cycle serine/threonine-protein kinase CDC5/MSD2	KOG0575
g1169	contig_57	3457694	3458251	-	gi|154413722|ref|XP_001579890.1|	-	Putative ankyrin repeat protein L25	KOG4177
g1170	contig_57	3459095	3460298	+	gi|255931157|ref|XP_002557135.1|	GO:0016491	Probable D-xylulose reductase A	KOG0024
g1171	contig_57	3460397	3462276	-	gi|584414312|emb|CDM33089.1|	-	Uncharacterized transporter C3H1.06c	KOG0254
g1172	contig_57	3463440	3463724	-	gi|525585209|gb|EPS31459.1|	-	-	-
g1173	contig_57	3464859	3466780	+	gi|145255893|ref|XP_001399135.1|	GO:0005529	Glutamine--fructose-6-phosphate aminotransferase [isomerizing]	KOG1268
g1174	contig_57	3467889	3469932	-	gi|615404637|ref|XP_007581442.1|	GO:0016758	Chitin synthase 6	KOG2571
g1175	contig_57	3471162	3472463	+	gi|425766756|gb|EKV05354.1|	GO:0004553	Chitinase 1	KOG2806
g1176	contig_57	3473645	3474941	-	gi|615404643|ref|XP_007581444.1|	GO:0051287	UDP-N-acetyl-D-glucosamine 6-dehydrogenase	KOG2666
g1177	contig_57	3477026	3478235	+	gi|407921390|gb|EKG14539.1|	GO:0016810	Chitooligosaccharide deacetylase
g1178	contig_57	3478708	3480627	-	gi|255931133|ref|XP_002557123.1|	GO:0008080	-	-
g1179	contig_57	3481144	3482043	-	gi|121719956|ref|XP_001276676.1|	-	-	-
g1180	contig_57	3485010	3485774	+	gi|584413990|emb|CDM32766.1|	-	Uncharacterized protein YBR096W	KOG4366
g1181	contig_57	3486562	3487837	+	gi|425765875|gb|EKV04520.1|	GO:0048037	Glyoxylate reductase	KOG0069
g1182	contig_57	3488426	3489440	-	gi|255931127|ref|XP_002557120.1|	-	-	-
g1183	contig_57	3489861	3492645	-	gi|255931125|ref|XP_002557119.1|	GO:0030983	PMS1 protein homolog 1	KOG1978
g1184	contig_57	3492889	3494387	+	gi|584414317|emb|CDM33094.1|	GO:0008270	Palmitoyltransferase pfa4	KOG1314
g1185	contig_57	3494427	3495361	-	gi|425765872|gb|EKV04517.1|	GO:0008168	Uncharacterized methyltransferase C70.08c
g1186	contig_57	3497268	3499710	+	gi|255931105|ref|XP_002557109.1|	-	-	-
g1187	contig_57	3500586	3501592	-	gi|255939860|ref|XP_002560699.1|	-	-	-
g1188	contig_57	3502405	3505638	-	gi|425765868|gb|EKV04513.1|	GO:0016758	Sterol 3-beta-glucosyltransferase	KOG1192
g1189	contig_57	3506309	3508012	-	gi|584414339|emb|CDM33116.1|	-	Drug resistance protein YOR378W	KOG0254
g1190	contig_57	3508924	3510811	-	gi|584414324|emb|CDM33101.1|	GO:0022857	Quinate permease	KOG0254
g1191	contig_57	3516143	3517901	+	gi|584414337|emb|CDM33114.1|	GO:0008324	Zinc homeostasis factor 1	KOG1483
g1192	contig_57	3518899	3520918	+	gi|255931089|ref|XP_002557101.1|	GO:0016787	Cell division control protein 1	KOG3662
g1193	contig_57	3522764	3524437	+	gi|584414335|emb|CDM33112.1|	GO:0022857	Probable glucose transporter rco-3	KOG0254
g1194	contig_57	3525424	3526611	-	gi|115389124|ref|XP_001212067.1|	-	-	-
g1195	contig_57	3527944	3529341	+	gi|557729496|dbj|GAD92011.1|	-	Monocarboxylate transporter 12	KOG2504
g1196	contig_57	3529683	3530339	-	gi|599155701|gb|EYE94890.1|	-	-	-
g1197	contig_57	3531235	3533145	+	gi|255931067|ref|XP_002557090.1|	-	Sterol esterase 2	KOG2624
g1198	contig_57	3537534	3537858	+	gi|584414343|emb|CDM33120.1|	-	-	-
g1199	contig_57	3539788	3541623	-	gi|255939512|ref|XP_002560525.1|	GO:0008270	Uncharacterized transcriptional regulatory protein C139.03
g1200	contig_57	3542002	3542965	+	gi|599151139|gb|EYE90605.1|	-	NmrA-like family domain-containing protein 1
g1201	contig_57	3544176	3546153	+	gi|121712214|ref|XP_001273722.1|	GO:0022857	Maltose permease MAL31	KOG0254
g1202	contig_57	3552032	3553798	+	gi|255931041|ref|XP_002557077.1|	GO:0045735	Oxalate decarboxylase OxdC
g1203	contig_57	3553939	3554664	-	gi|584414352|emb|CDM33129.1|	-	-	-
g1204	contig_57	3555379	3555813	-	gi|584414354|emb|CDM33131.1|	GO:0005199	-	-
g1205	contig_57	3557249	3559081	+	gi|584414355|emb|CDM33132.1|	GO:0003743	Eukaryotic translation initiation factor 3 subunit D	KOG2479
g1206	contig_57	3560162	3562066	-	gi|255931005|ref|XP_002557059.1|	-	-	-
g1207	contig_57	3562577	3564061	+	gi|255931003|ref|XP_002557058.1|	-	-	-
g1208	contig_57	3564516	3567240	-	gi|255931001|ref|XP_002557057.1|	-	Zinc finger protein C725.08	KOG2295
g1209	contig_57	3569027	3569854	+	gi|584414362|emb|CDM33139.1|	-	-	-
g1210	contig_57	3571105	3572175	-	gi|425781859|gb|EKV19796.1|	GO:0003700	Transcriptional activator HAP2	KOG1561
g1211	contig_57	3576711	3581516	+	gi|255930989|ref|XP_002557051.1|	GO:0005524	Kinesin-like protein KIF1C	KOG0245
g1212	contig_57	3582025	3583402	+	gi|255930987|ref|XP_002557050.1|	-	O-glucosyltransferase rumi	KOG2458
g1213	contig_57	3583678	3585360	-	gi|255930985|ref|XP_002557049.1|	GO:0005215	Sulfate permease 2	KOG0236
g1214	contig_57	3587578	3589182	+	gi|557724783|dbj|GAD96487.1|	-	-	-
g1215	contig_57	3590687	3591395	+	gi|227343519|gb|ACP27610.1|	GO:0004553	Endo-1,4-beta-xylanase B
g1216	contig_57	3592214	3592939	+	gi|255931349|ref|XP_002557231.1|	-	-	-
g1217	contig_57	3594587	3596017	+	gi|584146342|gb|EWG55596.1|	GO:0004348	Glucuronoxylanase XynC	KOG2566
g1218	contig_57	3597645	3598790	-	gi|255956573|ref|XP_002569039.1|	-	-	-
g1219	contig_57	3601675	3603421	-	gi|255932331|ref|XP_002557722.1|	GO:0008270	Adhesion and hyphal regulator 1
g1220	contig_57	3603916	3604752	+	gi|425767947|gb|EKV06497.1|	GO:0008703	2,5-diamino-6-ribosylamino-4(3H)-pyrimidinone 5'-phosphate reductase
g1221	contig_57	3606439	3607542	-	gi|115401094|ref|XP_001216135.1|	-	D-threonine aldolase
g1222	contig_57	3608502	3608990	+	gi|530462213|gb|EQB45163.1|	-	-	-
g1223	contig_57	3609628	3611163	-	gi|255930957|ref|XP_002557035.1|	-	Nitrosoguanidine resistance protein SNG1
g1224	contig_57	3612436	3614096	+	gi|530477547|gb|EQB57074.1|	-	Polyamine transporter 4	KOG0255
g1225	contig_57	3614609	3615452	+	gi|425767949|gb|EKV06499.1|	GO:0015035	Glutathione S-transferase kappa 1
g1226	contig_57	3615821	3617473	-	gi|255946878|ref|XP_002564206.1|	-	Putative amidohydrolase YtcJ
g1227	contig_57	3617968	3623330	+	gi|255946882|ref|XP_002564208.1|	-	N amino acid transport system protein
g1228	contig_57	3624750	3625793	+	gi|169769713|ref|XP_001819326.1|	-	Uncharacterized protein PA2218
g1229	contig_57	3631960	3633032	+	gi|584414383|emb|CDM33160.1|	GO:0004553	Arabinan endo-1,5-alpha-L-arabinosidase
g1230	contig_57	3633314	3635062	-	gi|255930949|ref|XP_002557031.1|	GO:0005524	Probable mitochondrial chaperone BCS1-B	KOG0743
g1231	contig_57	3636251	3638438	-	gi|255930943|ref|XP_002557028.1|	GO:0003824	Uncharacterized pyrophosphatase/phosphodiesterase C725.05c	KOG2645
g1232	contig_57	3640055	3640570	+	gi|255930941|ref|XP_002557027.1|	-	-	-
g1233	contig_57	3641638	3646188	-	gi|425767954|gb|EKV06504.1|	-	-	-
g1234	contig_57	3647338	3648915	-	gi|255930937|ref|XP_002557025.1|	GO:0030528	Protein esc1	KOG2483
g1235	contig_57	3651119	3653120	-	gi|255930933|ref|XP_002557023.1|	GO:0031418	PKHD-type hydroxylase ofd1	KOG3844
g1236	contig_57	3653610	3654389	+	gi|425767958|gb|EKV06508.1|	-	-	-
g1237	contig_57	3654573	3655199	-	gi|584414396|emb|CDM33174.1|	-	-	-
g1238	contig_57	3656280	3656651	-	gi|587662021|gb|EWY84362.1|	-	Dihydroorotase
g1239	contig_57	3657167	3658105	-	gi|425767960|gb|EKV06510.1|	-	-	-
g1240	contig_57	3658719	3659617	-	gi|255930919|ref|XP_002557016.1|	GO:0003824	Enoyl-CoA delta isomerase 1, mitochondrial	KOG1683
g1241	contig_57	3660383	3661552	+	gi|584414410|emb|CDM33188.1|	GO:0016491	Alcohol dehydrogenase	KOG0023
g1242	contig_57	3662090	3663313	+	gi|115399380|ref|XP_001215279.1|	GO:0004497	Zeaxanthin epoxidase, chloroplastic	KOG2614
g1243	contig_57	3663406	3664669	-	gi|584414408|emb|CDM33186.1|	GO:0050662	Aldehyde reductase 2	KOG1502
g1244	contig_57	3665329	3665946	+	gi|584414407|emb|CDM33185.1|	-	-	-
g1245	contig_57	3666174	3667592	-	gi|425767965|gb|EKV06515.1|	GO:0016251	Transcription initiation factor TFIID subunit 7	KOG4011
g1246	contig_57	3667867	3668514	+	gi|584414403|emb|CDM33181.1|	-	Transcription initiation factor TFIID subunit 3
g1247	contig_57	3670022	3671694	+	gi|255947448|ref|XP_002564491.1|	-	Uncharacterized transporter C1529.01	KOG0255
g1248	contig_57	3677152	3678102	-	gi|407916304|gb|EKG09680.1|	-	NAD(P)H azoreductase
g1249	contig_57	3678607	3679114	+	gi|573059461|gb|ETS79259.1|	-	-	-
g1250	contig_57	3681268	3682967	+	gi|255955573|ref|XP_002568539.1|	-	-	-
g1251	contig_57	3684072	3687546	+	gi|584414412|emb|CDM33190.1|	-	pH-response regulator protein palC
g1252	contig_57	3687982	3688437	-	gi|425767973|gb|EKV06523.1|	-	NADH-ubiquinone oxidoreductase 12 kDa subunit, mitochondrial
g1253	contig_57	3689055	3690461	-	gi|425767974|gb|EKV06524.1|	GO:0016758	Probable alpha-1,6-mannosyltransferase MNN10	KOG4748
g1254	contig_57	3691095	3696604	-	gi|557722220|dbj|GAD98986.1|	GO:0016829	Low-specificity L-threonine aldolase	KOG0615
g1255	contig_57	3697050	3698727	+	gi|584414417|emb|CDM33195.1|	-	-	-
g1256	contig_57	3699487	3701850	+	gi|119499712|ref|XP_001266613.1|	GO:0005525	Interferon-induced GTP-binding protein Mx	KOG0446
g1257	contig_57	3717809	3719734	+	gi|159125707|gb|EDP50824.1|	-	-	-
g1258	contig_57	3722736	3723940	-	gi|584413673|emb|CDM32449.1|	-	-	-
g1259	contig_57	3724380	3726045	+	gi|322701913|gb|EFY93661.1|	-	-	-
g1260	contig_57	3727687	3728043	+	gi|392870182|gb|EAS30469.2|	-	-	-
g1261	contig_57	3728824	3730497	+	gi|584407279|emb|CDM37590.1|	-	Altered inheritance of mitochondria protein 9, mitochondrial
g1262	contig_57	3732724	3734088	-	gi|584412335|emb|CDM31101.1|	-	-	-
g1263	contig_57	3735205	3738291	+	gi|315051030|ref|XP_003174889.1|	GO:0005524	Putative disease resistance protein At4g10780
g1264	contig_57	3738434	3738820	-	gi|590022311|gb|EXK24169.1|	-	-	-
g1265	contig_57	3739275	3740227	+	gi|584413669|emb|CDM32445.1|	-	-	-
g1266	contig_57	3742351	3742893	+	gi|425766149|gb|EKV04775.1|	-	-	-
g1267	contig_57	3742931	3743785	-	gi|425766150|gb|EKV04776.1|	-	-	-
g1268	contig_57	3744974	3746545	+	gi|116207756|ref|XP_001229687.1|	-	-	-
g1269	contig_57	3746803	3749163	-	gi|255956735|ref|XP_002569120.1|	-	-	-
g1270	contig_57	3749980	3751197	+	gi|255956739|ref|XP_002569122.1|	-	-	-
g1271	contig_57	3751528	3753159	+	gi|169784700|ref|XP_001826811.1|	GO:0005515	Putative ankyrin repeat protein RF_0381	KOG4177
g1272	contig_57	3753690	3757155	-	gi|242795697|ref|XP_002482645.1|	GO:0042802	Nephrocystin-3	KOG1840
g1273	contig_57	3762381	3764844	-	gi|425772131|gb|EKV10550.1|	-	-	-
g1274	contig_57	3767179	3767842	+	-	-	-	-
g1275	contig_57	3771040	3772977	-	gi|119483502|ref|XP_001261654.1|	GO:0005515	Ankyrin-2	KOG4177
g1276	contig_57	3774491	3775434	+	gi|584405812|emb|CDM38585.1|	GO:0003676	-	-
g1277	contig_57	3776397	3777604	+	gi|119473509|ref|XP_001258630.1|	GO:0016491	Zinc-binding alcohol dehydrogenase domain-containing protein cipB	KOG1198
g1278	contig_57	3777968	3778786	-	gi|83771564|dbj|BAE61695.1|	-	Uncharacterized WD repeat-containing protein alr3466	KOG0271
g1279	contig_57	3784018	3785121	-	gi|471561187|gb|EMR63043.1|	GO:0016491	Zeta-crystallin
g1280	contig_57	3786361	3787454	+	gi|115443522|ref|XP_001218568.1|	GO:0016491	Short-chain dehydrogenase TIC 32, chloroplastic	KOG1208
g1281	contig_57	3791194	3791718	-	gi|255934899|ref|XP_002558476.1|	-	-	-
g1282	contig_57	3793356	3794378	-	gi|391872106|gb|EIT81249.1|	-	-	-
g1283	contig_57	3798444	3799226	-	gi|255945505|ref|XP_002563520.1|	-	-	-
g1284	contig_57	3800264	3800734	+	gi|242816483|ref|XP_002486787.1|	-	-	-
g1285	contig_57	3800878	3801450	-	gi|255946401|ref|XP_002563968.1|	-	-	-
g1286	contig_57	3804299	3809304	+	gi|70996817|ref|XP_753163.1|	GO:0050660	Ferric reductase transmembrane component 3	KOG0039
g1287	contig_57	3809568	3810733	-	gi|358371283|dbj|GAA87891.1|	GO:0005524	-	-
g1288	contig_57	3811014	3814270	+	gi|358371282|dbj|GAA87890.1|	-	-	-
g1289	contig_57	3815633	3816634	-	gi|159125796|gb|EDP50912.1|	-	-	-
g1290	contig_57	3820442	3822244	-	gi|83774391|dbj|BAE64515.1|	-	-	-
g1291	contig_57	3829755	3830681	-	gi|550913604|ref|WP_022666602.1|	GO:0046872	Arginase
g1292	contig_57	3832008	3833079	+	gi|67904388|ref|XP_682450.1|	-	Isoflavone reductase
g1293	contig_57	3834547	3841379	-	gi|591404434|gb|EXL39571.1|	GO:0046872	P-type cation-transporting ATPase	KOG0207
g1294	contig_57	3842411	3843049	-	gi|584413661|emb|CDM32437.1|	-	Uncharacterized protein C5H10.03	KOG4754
g1295	contig_57	3843581	3849260	-	gi|70991937|ref|XP_750817.1|	GO:0015109	Chromate transport protein
g1296	contig_57	3856019	3857071	-	gi|400598175|gb|EJP65895.1|	-	-	-
g1297	contig_57	3858639	3859638	+	gi|477514845|gb|ENH67203.1|	-	-	-
g1298	contig_57	3860463	3861431	-	gi|584139628|gb|EWG48965.1|	-	-	-
g1299	contig_57	3862549	3863794	+	gi|587661177|gb|EWY83531.1|	-	-	-
g1300	contig_57	3865660	3870471	+	gi|119466943|ref|XP_001257278.1|	GO:0016491	Uncharacterized oxidoreductase C736.13	KOG1208
g1301	contig_57	3872122	3873084	-	gi|584414418|emb|CDM33196.1|	-	-	-
g1302	contig_57	3874261	3876816	+	gi|584414421|emb|CDM33199.1|	-	Uncharacterized glycosidase Rv0584
g1303	contig_57	3877488	3879425	+	gi|255930879|ref|XP_002556996.1|	-	High-affinity methionine permease	KOG1287
g1304	contig_57	3880283	3882562	+	gi|255930877|ref|XP_002556995.1|	GO:0004553	Alpha-glucosidase YihQ	KOG1066
g1305	contig_57	3882975	3885352	+	gi|557727238|dbj|GAD94192.1|	-	-	-
g1306	contig_57	3885665	3887128	-	gi|255930871|ref|XP_002556992.1|	GO:0045735	Oxalate decarboxylase OxdC
g1307	contig_57	3887425	3888195	+	gi|255930869|ref|XP_002556991.1|	-	-	-
g1308	contig_57	3889183	3889713	-	-	-	-	-
g1309	contig_57	3890502	3891313	+	gi|121708887|ref|XP_001272279.1|	GO:0016491	Aflatoxin biosynthesis ketoreductase nor-1	KOG1611
g1310	contig_57	3892572	3894379	+	gi|584414430|emb|CDM33208.1|	-	N amino acid transport system protein
g1311	contig_57	3896247	3896741	+	gi|255930859|ref|XP_002556986.1|	-	Uncharacterized MFS-type transporter C530.15c	KOG0255
g1312	contig_57	3897751	3899379	+	gi|255946553|ref|XP_002564044.1|	GO:0022857	Sugar transporter STL1	KOG0254
g1313	contig_57	3900050	3900955	+	gi|525585380|gb|EPS31630.1|	-	-	-
g1314	contig_57	3901194	3901994	-	gi|425767991|gb|EKV06541.1|	GO:0016491	L-xylulose reductase	KOG0725
g1315	contig_57	3902756	3904649	+	gi|255930853|ref|XP_002556983.1|	-	Uncharacterized MFS-type transporter C947.06c	KOG0255
g1316	contig_57	3906565	3907863	+	gi|255930851|ref|XP_002556982.1|	GO:0008199	-	-
g1317	contig_57	3908818	3910140	+	gi|525585375|gb|EPS31625.1|	-	-	-
g1318	contig_57	3910735	3912427	-	gi|584414435|emb|CDM33213.1|	GO:0022857	Maltose permease MAL31	KOG0254
g1319	contig_57	3914283	3914996	-	gi|255930841|ref|XP_002556977.1|	-	-	-
g1320	contig_57	3915643	3917557	-	gi|255930835|ref|XP_002556974.1|	-	Autophagy-related protein 22-2
g1321	contig_57	3917912	3921426	+	gi|584416820|emb|CDM28528.1|	GO:0050662	Mitogen-activated protein kinase HOG1	KOG0660
g1322	contig_57	3921970	3922614	+	gi|584414439|emb|CDM33217.1|	-	UPF0098 protein aq_1250
g1323	contig_57	3923917	3925347	-	gi|425768001|gb|EKV06551.1|	-	-	-
g1324	contig_57	3927191	3931533	-	gi|599150785|gb|EYE90286.1|	GO:0046912	Citrate synthase 3, peroxisomal	KOG2617
g1325	contig_57	3931808	3933128	-	gi|584414444|emb|CDM33222.1|	GO:0016846	-	-
g1326	contig_57	3935804	3936960	+	gi|255948678|ref|XP_002565106.1|	-	Uncharacterized membrane protein MJ0091
g1327	contig_57	3938120	3941669	-	gi|326469597|gb|EGD93606.1|	GO:0008270	Solute carrier family 40 member 1	KOG2601
g1328	contig_57	3942901	3943983	+	gi|584415341|emb|CDM27035.1|	-	Nitrile-specifier protein 5	KOG0379
g1329	contig_57	3944647	3945325	-	gi|584414445|emb|CDM33223.1|	-	-	-
g1330	contig_57	3947016	3949015	+	gi|425768008|gb|EKV06558.1|	-	Putative transcription factor SEF1
g1331	contig_57	3950933	3953352	+	gi|584414448|emb|CDM33226.1|	-	Sexual differentiation process protein isp4	KOG2262
g1332	contig_57	3954241	3955888	-	gi|255930813|ref|XP_002556963.1|	GO:0020037	Benzoate 4-monooxygenase	KOG0158
g1333	contig_57	3956496	3957685	-	gi|255930811|ref|XP_002556962.1|	-	-	-
g1334	contig_57	3958577	3961147	-	gi|584414451|emb|CDM33229.1|	-	DNA cross-link repair protein pso2/snm1	KOG1361
g1335	contig_57	3961796	3964185	-	gi|212540296|ref|XP_002150303.1|	GO:0015205	Purine-cytosine permease fcyB
g1336	contig_57	3964869	3965582	-	gi|169763114|ref|XP_001727457.1|	-	-	-
g1337	contig_57	3966033	3968802	+	gi|238488979|ref|XP_002375727.1|	GO:0016758	Sterol 3-beta-glucosyltransferase	KOG1192
g1338	contig_57	3969794	3970783	+	gi|425767717|gb|EKV06282.1|	-	-	-
g1339	contig_57	3971826	3974825	-	gi|584414454|emb|CDM33232.1|	GO:0008168	-	-
g1340	contig_57	3977941	3978847	+	gi|584414456|emb|CDM33234.1|	GO:0004750	Ribulose-phosphate 3-epimerase	KOG3111
g1341	contig_57	3979022	3980153	-	gi|255930801|ref|XP_002556957.1|	-	Uncharacterized protein YFR016C	KOG1181
g1342	contig_57	3983047	3984943	+	gi|255930799|ref|XP_002556956.1|	-	-	-
g1343	contig_57	3985926	3990594	+	gi|255930795|ref|XP_002556954.1|	GO:0005524	Kinesin light chain 1	KOG1840
g1344	contig_57	3992427	3994421	+	gi|425767845|gb|EKV06398.1|	-	Siderophore iron transporter mirB	KOG0254
g1345	contig_57	3995095	4003144	+	gi|255949538|ref|XP_002565536.1|	GO:0005524	Dicarboxylic amino acid permease
g1346	contig_57	4004677	4006985	+	gi|584414464|emb|CDM33242.1|	GO:0046556	Alpha-N-arabinofuranosidase A
g1347	contig_57	4007702	4009658	-	gi|255930787|ref|XP_002556950.1|	-	Uncharacterized transporter C460.03	KOG0254
g1348	contig_57	4009977	4011685	+	gi|584414466|emb|CDM33244.1|	-	-	-
g1349	contig_57	4014182	4014862	+	gi|557726007|dbj|GAD95340.1|	-	-	-
g1350	contig_57	4015378	4020069	+	gi|584414467|emb|CDM33245.1|	GO:0042626	ABC transporter CDR4	KOG0065
g1351	contig_57	4022246	4023940	-	gi|255945379|ref|XP_002563457.1|	-	Uncharacterized MFS-type transporter C1271.10c	KOG0255
g1352	contig_57	4024877	4025565	-	gi|255945377|ref|XP_002563456.1|	-	Lactam utilization protein lamB
g1353	contig_57	4026371	4028991	-	gi|255945375|ref|XP_002563455.1|	GO:0008270	Transcriptional activator ARO80
g1354	contig_57	4029236	4033852	+	gi|255945373|ref|XP_002563454.1|	GO:0016874	Putative urea carboxylase	KOG0238
g1355	contig_57	4036118	4036535	+	-	-	-	-
g1356	contig_57	4039024	4039595	+	gi|255930781|ref|XP_002556947.1|	-	Transport protein particle subunit trs23	KOG3369
g1357	contig_57	4039803	4040799	-	gi|350636275|gb|EHA24635.1|	GO:0008270	26S proteasome non-ATPase regulatory subunit 4	KOG2884
g1358	contig_57	4041005	4042154	+	gi|425767851|gb|EKV06404.1|	-	-	-
g1359	contig_57	4043606	4047477	-	gi|255930763|ref|XP_002556938.1|	GO:0008270	Rho-type GTPase-activating protein 1	KOG2710
g1360	contig_57	4048596	4050275	+	gi|255930759|ref|XP_002556936.1|	GO:0016881	Ubiquitin-conjugating enzyme E2 Z	KOG0895
g1361	contig_57	4050670	4051964	+	gi|255930755|ref|XP_002556934.1|	GO:0003854	Sterol-4-alpha-carboxylate 3-dehydrogenase, decarboxylating	KOG1430
g1362	contig_57	4052270	4053846	-	gi|255930743|ref|XP_002556928.1|	-	Uncharacterized transporter C11D3.18C	KOG2533
g1363	contig_57	4054711	4056547	-	gi|584414482|emb|CDM33260.1|	-	Uncharacterized MFS-type transporter C1683.03c	KOG0254
g1364	contig_57	4057357	4058157	-	gi|584414479|emb|CDM33257.1|	-	Putative acetyltransferase C18B11.09c	KOG4750
g1365	contig_57	4058326	4059970	-	gi|584414477|emb|CDM33255.1|	GO:0022857	Quinate permease	KOG0254
g1366	contig_57	4063045	4063568	+	gi|425767859|gb|EKV06412.1|	-	-	-
g1367	contig_57	4063798	4064265	+	gi|358373906|dbj|GAA90501.1|	GO:0050660	L-sorbose 1-dehydrogenase	KOG1238
g1368	contig_57	4064790	4067203	-	gi|255930721|ref|XP_002556917.1|	GO:0008270	Nitrogen assimilation transcription factor nit-4
g1369	contig_57	4068631	4074804	+	gi|255930717|ref|XP_002556915.1|	GO:0005524	Serine/threonine-protein kinase cek1	KOG0605
g1370	contig_57	4076069	4078924	+	gi|255930715|ref|XP_002556914.1|	-	Uncharacterized MscS family protein C1183.11	KOG4629
g1371	contig_57	4079411	4086586	+	gi|525585320|gb|EPS31570.1|	GO:0042626	Tubulin alpha-2 chain	KOG0054
g1372	contig_57	4086875	4087881	-	gi|425767863|gb|EKV06416.1|	-	Mitochondrial thiamine pyrophosphate carrier 1	KOG0752
g1373	contig_57	4088197	4089555	+	gi|425767864|gb|EKV06417.1|	GO:0016491	Gamma-butyrobetaine dioxygenase	KOG3889
g1374	contig_57	4090092	4091014	-	gi|255930707|ref|XP_002556910.1|	GO:0015035	Monothiol glutaredoxin-3	KOG0911
g1375	contig_57	4091318	4093444	+	gi|584414492|emb|CDM33270.1|	-	Uncharacterized exonuclease C637.09	KOG2248
g1376	contig_57	4093728	4094216	+	gi|584414493|emb|CDM33271.1|	GO:0051537	-	-
g1377	contig_57	4095496	4096962	-	gi|297242551|gb|ADI24950.1|	-	-	-
g1378	contig_57	4098340	4100387	+	gi|297242550|gb|ADI24949.1|	-	Putative HC-toxin efflux carrier TOXA	KOG0254
g1379	contig_57	4101477	4110017	+	gi|297242554|gb|ADI24953.1|	GO:0048037	Conidial yellow pigment biosynthesis polyketide synthase	KOG1202
g1380	contig_57	4110674	4114231	-	gi|297242555|gb|ADI24954.1|	GO:0008171	Sterigmatocystin 8-O-methyltransferase
g1381	contig_57	4114662	4115994	+	gi|297242557|gb|ADI24956.1|	GO:0046983	Sterigmatocystin 8-O-methyltransferase	KOG3178
g1382	contig_57	4116325	4117458	-	gi|297242558|gb|ADI24957.1|	-	Uncharacterized protein C757.02c
g1383	contig_57	4118174	4119877	+	gi|297242559|gb|ADI24958.1|	GO:0020037	Pisatin demethylase	KOG0156
g1384	contig_57	4120033	4121021	-	gi|297242560|gb|ADI24959.1|	GO:0005515	Kinase D-interacting substrate of 220 kDa	KOG0504
g1385	contig_57	4126508	4128013	+	gi|145252840|ref|XP_001397933.1|	-	Low-affinity iron/zinc ion transport protein fet4
g1386	contig_57	4129329	4130548	-	gi|121714527|ref|XP_001274874.1|	-	-	-
g1387	contig_57	4131390	4132511	+	gi|425781958|gb|EKV19892.1|	-	Platelet-activating factor acetylhydrolase
g1388	contig_57	4133886	4135272	-	gi|425781738|gb|EKV19684.1|	GO:0016787	Probable inactive purple acid phosphatase 16	KOG1432
g1389	contig_57	4137092	4141008	+	gi|584409921|emb|CDM33945.1|	GO:0046872	Calcium-transporting ATPase 2	KOG0204
g1390	contig_57	4143220	4144420	+	gi|255940584|ref|XP_002561061.1|	GO:0046873	Putative metal ion transporter C27B12.12c
g1391	contig_57	4146020	4147454	-	gi|255956671|ref|XP_002569088.1|	GO:0004930	Cyclic AMP receptor 2
g1392	contig_57	4149935	4150956	-	gi|255944947|ref|XP_002563241.1|	-	-	-
g1393	contig_57	4154481	4155834	-	gi|599160958|gb|EYE99908.1|	-	-	-
g1394	contig_57	4157829	4159267	+	gi|255946788|ref|XP_002564161.1|	GO:0008171	Sterigmatocystin 8-O-methyltransferase	KOG3178
g1395	contig_57	4162222	4167357	+	gi|154287136|ref|XP_001544363.1|	GO:0008026	ATP-dependent DNA helicase Q1	KOG0351
g1396	contig_89	1937	3925	-	gi|425769603|gb|EKV08094.1|	GO:0030955	Pyruvate kinase	KOG2323
g1397	contig_89	5972	7462	-	gi|255943305|ref|XP_002562421.1|	GO:0005515	-	-
g1398	contig_89	8177	10495	+	gi|584409412|emb|CDM33435.1|	-	-	-
g1399	contig_89	12117	12800	-	gi|255943299|ref|XP_002562418.1|	-	-	-
g1400	contig_89	13309	14326	+	gi|425769393|gb|EKV07886.1|	-	UPF0590 protein C409.17c
g1401	contig_89	14444	15703	-	gi|525583983|gb|EPS30233.1|	-	Probable homoisocitrate dehydrogenase	KOG0785
g1402	contig_89	16355	17320	+	gi|119474155|ref|XP_001258953.1|	-	-	-
g1403	contig_89	17404	18982	-	gi|121712036|ref|XP_001273633.1|	GO:0008270	Uncharacterized protein AN5342
g1404	contig_89	19910	21931	+	gi|255943291|ref|XP_002562414.1|	-	-	-
g1405	contig_89	22461	24152	-	gi|255943289|ref|XP_002562413.1|	-	-	-
g1406	contig_89	24616	25128	+	gi|425769399|gb|EKV07892.1|	GO:0003735	37S ribosomal protein S8, mitochondrial
g1407	contig_89	25812	26051	+	-	-	-	-
g1408	contig_89	26872	30435	+	gi|425769401|gb|EKV07894.1|	GO:0003854	Sterol-4-alpha-carboxylate 3-dehydrogenase, decarboxylating	KOG1430
g1409	contig_89	32984	33760	+	gi|589984990|gb|EXJ68036.1|	-	Putative methylesterase 11, chloroplastic
g1410	contig_89	35016	39211	-	gi|471561738|gb|EMR63439.1|	GO:0004553	Killer toxin subunits alpha/beta	KOG2806
g1411	contig_89	39840	40878	+	gi|471561737|gb|EMR63438.1|	-	-	-
g1412	contig_89	41119	42855	+	gi|297242545|gb|ADI24945.1|	-	-	-
g1413	contig_89	43617	45147	+	gi|67540988|ref|XP_664268.1|	-	-	-
g1414	contig_89	46237	49632	-	gi|425769404|gb|EKV07897.1|	GO:0008270	Recoverin family protein DDB_G0274781	KOG1426
g1415	contig_89	50218	52077	-	gi|255943273|ref|XP_002562405.1|	-	Vacuolar membrane amino acid uptake transporter fnx2	KOG0254
g1416	contig_89	52453	53691	-	gi|238484953|ref|XP_002373715.1|	-	Probable methionine aminopeptidase 1	KOG2738
g1417	contig_89	54053	55930	+	gi|255943269|ref|XP_002562403.1|	GO:0004497	Kynurenine 3-monooxygenase	KOG2614
g1418	contig_89	56271	58097	-	gi|525584224|gb|EPS30474.1|	-	Pre-mRNA-processing factor 17	KOG0282
g1419	contig_89	58852	59493	-	gi|255943265|ref|XP_002562401.1|	-	ER-derived vesicles protein ERV14	KOG2729
g1420	contig_89	60246	63550	-	gi|255943263|ref|XP_002562400.1|	GO:0016887	Probable ATP-dependent permease	KOG0061
g1421	contig_89	64096	65476	+	gi|584409434|emb|CDM33457.1|	GO:0030170	Aspartate aminotransferase	KOG0257
g1422	contig_89	67359	69384	+	gi|255943259|ref|XP_002562398.1|	GO:0003824	Fatty acid transporter protein	KOG1179
g1423	contig_89	69908	70990	-	gi|584414143|emb|CDM32919.1|	-	-	-
g1424	contig_89	75239	76399	+	gi|255939840|ref|XP_002560689.1|	-	-	-
g1425	contig_89	76991	78889	-	gi|71002734|ref|XP_756048.1|	-	-	-
g1426	contig_89	80646	81502	-	gi|255944591|ref|XP_002563063.1|	-	Aflatoxin B1 aldehyde reductase member 3	KOG1575
g1427	contig_89	82738	84095	+	gi|74698177|sp|Q9HEZ3.1|PEPB_PENJA	GO:0004190	Aspartic protease pepB	KOG1339
g1428	contig_89	86080	88874	+	gi|322702920|gb|EFY94539.1|	-	Oligopeptide transporter 2	KOG2262
g1429	contig_89	90201	91958	-	gi|169773601|ref|XP_001821269.1|	GO:0004379	Glycylpeptide N-tetradecanoyltransferase	KOG2779
g1430	contig_89	92838	95251	+	gi|596658288|ref|XP_007274584.1|	GO:0004222	Saccharolysin	KOG2089
g1431	contig_89	98663	99478	+	gi|525586722|gb|EPS32972.1|	-	Aspergillopepsin-2
g1432	contig_89	103232	104498	-	gi|358380017|gb|EHK17696.1|	-	-	-
g1433	contig_89	105714	112346	+	gi|159126126|gb|EDP51242.1|	GO:0004553	Killer toxin subunits alpha/beta	KOG2806
g1434	contig_89	112981	117945	+	gi|584409437|emb|CDM33460.1|	GO:0005524	Serine/threonine-protein kinase gad8
g1435	contig_89	118281	121925	+	gi|584409438|emb|CDM33461.1|	GO:0008270	Uncharacterized transcriptional regulatory protein C139.03
g1436	contig_89	122187	123311	-	gi|584409440|emb|CDM33463.1|	GO:0046872	37S ribosomal protein S26, mitochondrial	KOG0876
g1437	contig_89	123926	125152	+	gi|584409441|emb|CDM33464.1|	-	-	-
g1438	contig_89	125496	127271	-	gi|584409442|emb|CDM33465.1|	-	GPI transamidase component PIG-S homolog	KOG2216
g1439	contig_89	127675	128451	-	gi|584409443|emb|CDM33466.1|	-	Uncharacterized THOC5 family protein	KOG2216
g1440	contig_89	128812	130382	+	gi|255943243|ref|XP_002562390.1|	-	Uncharacterized protein C30D11.11	KOG0748
g1441	contig_89	131233	132393	-	gi|584409445|emb|CDM33468.1|	-	Uncharacterized methyltransferase ABP140	KOG2361
g1442	contig_89	133345	133971	+	gi|255943239|ref|XP_002562388.1|	-	-	-
g1443	contig_89	136740	137534	-	gi|425769426|gb|EKV07919.1|	-	Nuclear movement protein nudC	KOG2265
g1444	contig_89	140852	143449	-	gi|255943229|ref|XP_002562383.1|	-	-	-
g1445	contig_89	143975	145678	-	gi|255943227|ref|XP_002562382.1|	-	Diphthamide biosynthesis protein 2	KOG2648
g1446	contig_89	145920	147052	-	gi|255943225|ref|XP_002562381.1|	GO:0046872	Maleylacetate reductase_x0001_sp|Q93T12.2|TFDF_DELAC RecName: Full=Maleylacetate reductase	KOG3857
g1447	contig_89	147527	148825	-	gi|255943217|ref|XP_002562377.1|	-	WD repeat-containing protein jip5	KOG2444
g1448	contig_89	149211	150697	-	gi|584409457|emb|CDM33480.1|	GO:0004553	Probable 1,4-beta-D-glucan cellobiohydrolase A
g1449	contig_89	153300	154575	+	gi|425769307|gb|EKV07803.1|	-	Uncharacterized protein Rv2715/MT2788_x0001_sp|P0A573.1|Y2734_MYCBO RecName: Full=Uncharacterized protein Mb2734
g1450	contig_89	158596	159407	-	gi|212546973|ref|XP_002153640.1|	-	-	-
g1451	contig_89	160592	162137	+	gi|255940526|ref|XP_002561032.1|	-	N amino acid transport system protein
g1452	contig_89	163494	164105	-	gi|584409556|emb|CDM33580.1|	-	Autophagy protein 5	KOG2976
g1453	contig_89	167346	169149	+	gi|255943011|ref|XP_002562274.1|	GO:0022857	Probable quinate permease	KOG0254
g1454	contig_89	169907	170836	-	gi|525584247|gb|EPS30497.1|	GO:0016787	Probable carboxylesterase 3	KOG1515
g1455	contig_89	172290	174352	+	gi|255943007|ref|XP_002562272.1|	-	Flavin carrier protein 1
g1456	contig_89	175191	179047	-	gi|146324393|ref|XP_750596.2|	GO:0005515	Ankyrin-3	KOG4177
g1457	contig_89	180267	182832	-	gi|146324391|ref|XP_750595.2|	GO:0005515	-	-
g1458	contig_89	186838	188457	+	gi|119500568|ref|XP_001267041.1|	-	Transcriptional regulatory protein pro-1
g1459	contig_89	191110	191757	+	gi|121707482|ref|XP_001271850.1|	-	-	-
g1460	contig_89	197338	198526	+	gi|525584254|gb|EPS30504.1|	-	-	-
g1461	contig_89	199060	199822	-	gi|584409549|emb|CDM33573.1|	-	Secretory component protein SHR3
g1462	contig_89	200080	202410	-	gi|584409548|emb|CDM33572.1|	-	pH-response regulator protein palF/RIM8
g1463	contig_89	203300	204035	-	gi|255943035|ref|XP_002562286.1|	-	Meiotic coiled-coil protein 7	KOG3433
g1464	contig_89	204885	205625	-	gi|425769295|gb|EKV07791.1|	-	-	-
g1465	contig_89	205821	207344	+	gi|584409545|emb|CDM33569.1|	-	DNA excision repair protein ERCC-8	KOG4283
g1466	contig_89	207551	207994	-	gi|584409544|emb|CDM33568.1|	-	-	-
g1467	contig_89	208729	210972	-	gi|525584261|gb|EPS30511.1|	-	-	-
g1468	contig_89	212363	212887	-	gi|255943045|ref|XP_002562291.1|	-	-	-
g1469	contig_89	215674	218292	-	gi|255935833|ref|XP_002558943.1|	GO:0008270	Transcriptional regulatory protein moc3
g1470	contig_89	219075	221298	-	gi|255935835|ref|XP_002558944.1|	GO:0022857	Sugar transporter STL1	KOG0254
g1471	contig_89	222452	223513	+	gi|255935837|ref|XP_002558945.1|	GO:0016491	D-arabinitol 2-dehydrogenase [ribulose-forming]	KOG0725
g1472	contig_89	223725	224710	-	gi|255943047|ref|XP_002562292.1|	-	Major allergen Asp f 2
g1473	contig_89	225440	226958	+	gi|255943049|ref|XP_002562293.1|	GO:0046873	Zinc-regulated transporter 1	KOG1558
g1474	contig_89	227216	228101	-	gi|255943051|ref|XP_002562294.1|	GO:0008080	Uncharacterized N-acetyltransferase C550.08
g1475	contig_89	232556	232904	+	gi|584409615|emb|CDM33639.1|	-	-	-
g1476	contig_89	236825	238749	-	gi|255942877|ref|XP_002562207.1|	GO:0050661	Flavin-containing monooxygenase YUCCA10	KOG1399
g1477	contig_89	241064	242896	+	gi|425769244|gb|EKV07743.1|	GO:0005509	Mannosyl-oligosaccharide 1,2-alpha-mannosidase MNS1	KOG2431
g1478	contig_89	243520	244372	-	gi|169767460|ref|XP_001818201.1|	-	Probable very-long-chain (3R)-3-hydroxyacyl-[acyl-carrier protein] dehydratase	KOG3187
g1479	contig_89	244988	245483	+	gi|584413730|emb|CDM32506.1|	-	-	-
g1480	contig_89	246372	248771	-	gi|119466985|ref|XP_001257299.1|	GO:0008270	Uncharacterized transcriptional regulatory protein C139.03
g1481	contig_89	249275	250867	+	gi|584409623|emb|CDM33647.1|	GO:0016747	Shikimate O-hydroxycinnamoyltransferase
g1482	contig_89	251087	254805	-	gi|425769246|gb|EKV07745.1|	GO:0022857	Inorganic phosphate transporter PHO84	KOG0252
g1483	contig_89	259797	260343	+	gi|425769249|gb|EKV07748.1|	-	-	-
g1484	contig_89	261281	262012	+	gi|584409629|emb|CDM33653.1|	-	-	-
g1485	contig_89	262587	263252	+	gi|425769251|gb|EKV07750.1|	-	NAD(P)H-dependent FMN reductase LOT6	KOG4530
g1486	contig_89	263390	267714	-	gi|255942861|ref|XP_002562199.1|	GO:0042626	Oligomycin resistance ATP-dependent permease YOR1	KOG0054
g1487	contig_89	268372	269859	-	gi|425769253|gb|EKV07752.1|	GO:0030170	Ornithine aminotransferase	KOG1402
g1488	contig_89	270556	272993	+	gi|255942857|ref|XP_002562197.1|	GO:0016757	GPI mannosyltransferase 3	KOG1771
g1489	contig_89	273637	276158	-	gi|425769255|gb|EKV07754.1|	GO:0008270	UBA domain-containing protein 3	KOG0703
g1490	contig_89	278399	280751	+	gi|350632274|gb|EHA20642.1|	GO:0031072	Cytochrome c peroxidase, mitochondrial
g1491	contig_89	281493	282649	+	gi|584409640|emb|CDM33664.1|	-	Thioredoxin-like protein 1	KOG0908
g1492	contig_89	291297	293039	+	gi|425769259|gb|EKV07758.1|	GO:0008270	Zinc finger protein YER130C	KOG1721
g1493	contig_89	294052	303397	+	gi|425769159|gb|EKV07660.1|	GO:0005524	Serine/threonine-protein kinase ATG1	KOG0595
g1494	contig_89	304981	306892	+	gi|425769161|gb|EKV07662.1|	-	High-affinity methionine permease	KOG1287
g1495	contig_89	307661	310353	+	gi|255942833|ref|XP_002562185.1|	GO:0008270	Aminopeptidase 2	KOG1046
g1496	contig_89	310677	313161	-	gi|584409650|emb|CDM33674.1|	GO:0008026	Pre-mRNA-splicing ATP-dependent RNA helicase prp28	KOG0333
g1497	contig_89	313687	315983	-	gi|70994154|ref|XP_751924.1|	-	Pre-mRNA-processing factor 39	KOG1258
g1498	contig_89	316658	317340	+	gi|425769165|gb|EKV07666.1|	-	54S ribosomal protein L25, mitochondrial
g1499	contig_89	318999	321632	+	gi|255942825|ref|XP_002562181.1|	GO:0030170	Molybdenum cofactor sulfurase	KOG2142
g1500	contig_89	322254	323210	-	gi|255942823|ref|XP_002562180.1|	-	Phytanoyl-CoA dioxygenase domain-containing protein 1 homolog
g1501	contig_89	323796	325756	+	gi|584409655|emb|CDM33679.1|	GO:0046872	Phosphonoacetate hydrolase	KOG2645
g1502	contig_89	325776	327829	-	gi|584409656|emb|CDM33680.1|	GO:0008270	Transcriptional activator of proteases prtT
g1503	contig_89	328370	330010	+	gi|584409657|emb|CDM33681.1|	GO:0022857	Putative inorganic phosphate transporter C8E4.01c	KOG0252
g1504	contig_89	331570	333382	-	gi|584413509|emb|CDM32283.1|	-	Uncharacterized amino-acid permease C15C4.04c	KOG1289
g1505	contig_89	334300	335637	+	gi|525580882|gb|EPS27132.1|	-	-	-
g1506	contig_89	336073	340551	-	gi|115436988|ref|XP_001217697.1|	GO:0016788	Ester hydrolase C11orf54 homolog	KOG4048
g1507	contig_89	341238	342726	-	gi|584409680|emb|CDM33704.1|	GO:0003824	Probable diacylglycerol pyrophosphate phosphatase 1	KOG3030
g1508	contig_89	343573	345327	-	gi|599152903|gb|EYE92238.1|	-	-	-
g1509	contig_89	347193	348405	-	gi|584409682|emb|CDM33706.1|	-	-	-
g1510	contig_89	349643	351043	+	gi|584409683|emb|CDM33707.1|	GO:0008171	Sterigmatocystin 8-O-methyltransferase	KOG3178
g1511	contig_89	351722	353067	-	gi|255942769|ref|XP_002562153.1|	-	-	-
g1512	contig_89	357205	358497	+	gi|425769151|gb|EKV07653.1|	-	Glucan endo-1,3-beta-glucosidase
g1513	contig_89	358709	359519	-	gi|255942765|ref|XP_002562151.1|	-	-	-
g1514	contig_89	359867	364164	-	gi|584409690|emb|CDM33714.1|	GO:0042626	ABC transporter B family member 6	KOG0055
g1515	contig_89	364931	365584	-	gi|425769154|gb|EKV07656.1|	-	Protein PBDC1 homolog	KOG4093
g1516	contig_89	365930	367577	-	gi|584409692|emb|CDM33716.1|	-	Synembryn-A
g1517	contig_89	368264	373552	+	gi|255942757|ref|XP_002562147.1|	-	Telomere length regulator protein rif1
g1518	contig_89	374123	375247	+	gi|255942755|ref|XP_002562146.1|	-	Pyridoxal reductase,chloroplastic	KOG1575
g1519	contig_89	376866	377951	+	gi|584409697|emb|CDM33721.1|	GO:0016853	Glucose-6-phosphate 1-epimerase	KOG1594
g1520	contig_89	379721	381477	-	gi|584409698|emb|CDM33722.1|	-	Choline transport protein	KOG1289
g1521	contig_89	382568	383582	-	gi|599160826|gb|EYE99776.1|	GO:0003824	2,3-dihydroxybenzoate decarboxylase	KOG4245
g1522	contig_89	384628	384963	+	gi|568122250|gb|ETN44843.1|	-	-	-
g1523	contig_89	386604	388026	+	gi|584409699|emb|CDM33723.1|	-	-	-
g1524	contig_89	389471	391410	+	gi|255942737|ref|XP_002562137.1|	-	Uncharacterized membrane protein YCR023C	KOG2615
g1525	contig_89	391678	392156	-	gi|584409700|emb|CDM33724.1|	-	-	-
g1526	contig_89	392631	393090	-	gi|83770224|dbj|BAE60357.1|	-	-	-
g1527	contig_89	393795	394657	-	gi|584409665|emb|CDM33689.1|	-	Sedoheptulose 1,7-bisphosphatase	KOG0235
g1528	contig_89	395316	395759	-	gi|584417060|emb|CDM28770.1|	-	-	-
g1529	contig_89	396330	397031	+	gi|115387761|ref|XP_001211386.1|	-	-	-
g1530	contig_89	397549	398208	-	gi|584409703|emb|CDM33727.1|	-	-	-
g1531	contig_89	400608	402262	+	gi|584409704|emb|CDM33728.1|	GO:0003849	Phospho-2-dehydro-3-deoxyheptonate aldolase
g1532	contig_89	402593	407099	-	gi|525584328|gb|EPS30578.1|	-	-	-
g1533	contig_89	410200	410615	+	gi|358391778|gb|EHK41182.1|	-	-	-
g1534	contig_89	412010	412477	+	gi|169766252|ref|XP_001817597.1|	-	-	-
g1535	contig_89	412678	414791	-	gi|255942725|ref|XP_002562131.1|	GO:0004620	Lysophospholipase	KOG1325
g1536	contig_89	415757	417695	-	gi|255942723|ref|XP_002562130.1|	GO:0005215	Probable peptide transporter ptr2	KOG1237
g1537	contig_89	420612	421734	-	gi|584409708|emb|CDM33732.1|	GO:0016491	D-arabinitol 2-dehydrogenase [ribulose-forming]	KOG0725
g1538	contig_89	426979	429709	-	gi|584409709|emb|CDM33733.1|	GO:0008484	-	-
g1539	contig_89	431130	431900	-	gi|255942713|ref|XP_002562125.1|	-	Uncharacterized protein AFUA_5G13800
g1540	contig_89	432686	433433	-	gi|584409711|emb|CDM33735.1|	-	-	-
g1541	contig_89	433940	434964	-	gi|255942709|ref|XP_002562123.1|	GO:0004579	Dolichyl-diphosphooligosaccharide--protein glycosyltransferase subunit 2	KOG2447
g1542	contig_89	435455	437305	+	gi|255942707|ref|XP_002562122.1|	-	-	-
g1543	contig_89	442011	445248	-	gi|255942685|ref|XP_002562111.1|	GO:0016491	Cutinase transcription factor 1 beta
g1544	contig_89	447475	449776	+	gi|584409731|emb|CDM33755.1|	GO:0004553	Beta-galactosidase	KOG2024
g1545	contig_89	451692	452708	+	gi|425769036|gb|EKV07544.1|	-	-	-
g1546	contig_89	453197	454834	+	gi|255942679|ref|XP_002562108.1|	GO:0016491	Vanillin dehydrogenase	KOG2451
g1547	contig_89	456486	457286	+	gi|255942681|ref|XP_002562109.1|	-	-	-
g1548	contig_89	459575	461680	-	gi|584405835|emb|CDM38563.1|	GO:0004553	Killer toxin subunits alpha/beta	KOG2806
g1549	contig_89	461772	464459	-	gi|255942703|ref|XP_002562120.1|	GO:0005515	Protein ral2	KOG0379
g1550	contig_89	465353	466181	-	gi|525584348|gb|EPS30598.1|	GO:0051920	Mitochondrial peroxiredoxin PRX1	KOG0854
g1551	contig_89	467819	469285	+	gi|584409720|emb|CDM33744.1|	-	Thymocyte nuclear protein 1	KOG3383
g1552	contig_89	470450	472070	+	gi|255942697|ref|XP_002562117.1|	GO:0016491	Putative aldehyde dehydrogenase-like protein C922.07c	KOG2450
g1553	contig_89	473467	474744	+	gi|425769031|gb|EKV07539.1|	-	Uncharacterized protein Saci_1674	KOG4499
g1554	contig_89	477762	479243	+	gi|255942689|ref|XP_002562113.1|	-	-	-
g1555	contig_89	482971	484068	+	gi|255946003|ref|XP_002563769.1|	GO:0016491	Festuclavine dehydrogenase subunit FgaOx3	KOG0134
g1556	contig_89	485235	486539	+	gi|255942671|ref|XP_002562104.1|	GO:0016810	Cyanide hydratase	KOG0805
g1557	contig_89	486796	488498	-	gi|145254324|ref|XP_001398594.1|	GO:0003993	3-phytase A	KOG1382
g1558	contig_89	491077	492455	+	gi|584409734|emb|CDM33758.1|	GO:0004553	Glucan 1,3-beta-glucosidase A
g1559	contig_89	492787	493471	-	gi|590015603|gb|EXJ90804.1|	-	Uncharacterized protein YML079W
g1560	contig_89	495798	497849	+	gi|255945383|ref|XP_002563459.1|	-	Uncharacterized MFS-type transporter PB1E7.08c	KOG0253
g1561	contig_89	498302	501783	-	gi|255942665|ref|XP_002562101.1|	GO:0008565	Importin-11	KOG1993
g1562	contig_89	502378	502870	+	gi|525581604|gb|EPS27854.1|	-	-	-
g1563	contig_89	503432	505069	+	gi|425769043|gb|EKV07551.1|	GO:0016491	Retinal dehydrogenase 2	KOG2450
g1564	contig_89	505396	506868	-	gi|425769042|gb|EKV07550.1|	GO:0016788	Acid phosphatase
g1565	contig_89	507872	509429	+	gi|425769044|gb|EKV07552.1|	-	Peroxisomal biogenesis factor 2	KOG2879
g1566	contig_89	509665	510396	-	gi|584409740|emb|CDM33764.1|	-	-	-
g1567	contig_89	511040	514495	-	gi|425768459|gb|EKV06981.1|	GO:0020037	Linoleate 10R-lipoxygenase	KOG2408
g1568	contig_89	517200	519278	+	gi|255942201|ref|XP_002561869.1|	-	Uncharacterized protein YEL023C
g1569	contig_89	520461	521336	+	gi|584409960|emb|CDM33984.1|	-	-	-
g1570	contig_89	521845	523629	+	gi|255942197|ref|XP_002561867.1|	-	Probable polyamine oxidase 4	KOG0029
g1571	contig_89	524246	526055	-	gi|255942195|ref|XP_002561866.1|	GO:0043565	Homeobox protein YOX1	KOG0490
g1572	contig_89	526978	528841	+	gi|121705900|ref|XP_001271213.1|	GO:0022857	Sugar transporter STL1	KOG0254
g1573	contig_89	530719	532924	-	gi|255942191|ref|XP_002561864.1|	GO:0008270	-	-
g1574	contig_89	533321	534145	-	gi|255942189|ref|XP_002561863.1|	GO:0008080	-	-
g1575	contig_89	534713	536736	-	gi|584409965|emb|CDM33989.1|	GO:0022857	High-affinity glucose transporter	KOG0254
g1576	contig_89	538111	539328	+	gi|255942185|ref|XP_002561861.1|	-	-	-
g1577	contig_89	540707	542090	+	gi|584409967|emb|CDM33991.1|	-	-	-
g1578	contig_89	544374	545693	+	gi|525583723|gb|EPS29973.1|	-	Uncharacterized protein AN5342
g1579	contig_89	546077	547257	-	gi|584409969|emb|CDM33993.1|	GO:0035091	Vacuolar morphogenesis protein 7 homolog
g1580	contig_89	547489	548822	-	gi|425770292|gb|EKV08765.1|	-	-	-
g1581	contig_89	549337	550574	+	gi|255934854|ref|XP_002558454.1|	-	F-box protein YDR306C
g1582	contig_89	550974	552291	+	gi|425768434|gb|EKV06957.1|	-	Uncharacterized CDP-alcohol phosphatidyltransferase class-I family protein C22A12.08c	KOG1618
g1583	contig_89	552652	554367	+	gi|255934850|ref|XP_002558452.1|	GO:0005524	Aspartate--tRNA ligase, cytoplasmic	KOG0556
g1584	contig_89	554970	558001	-	gi|584409975|emb|CDM33999.1|	GO:0005198	Probable coatomer subunit gamma	KOG1078
g1585	contig_89	558389	559279	+	gi|584409976|emb|CDM34000.1|	-	Phosducin-like protein 2	KOG3170
g1586	contig_89	560900	561949	-	gi|255934844|ref|XP_002558449.1|	GO:0046983	Fluconazole resistance protein 3
g1587	contig_89	563170	564699	-	gi|358368671|dbj|GAA85287.1|	GO:0005524	Casein kinase I homolog hhp1	KOG1164
g1588	contig_89	566257	570896	-	gi|255934840|ref|XP_002558447.1|	GO:0005515	Tip elongation aberrant protein 1	KOG0379
g1589	contig_89	573249	577840	+	gi|584409980|emb|CDM34004.1|	-	WD repeat-containing protein mip1	KOG1517
g1590	contig_89	578838	579602	+	gi|255938211|ref|XP_002559876.1|	-	-	-
g1591	contig_89	581522	582760	+	gi|255953243|ref|XP_002567374.1|	-	-	-
g1592	contig_89	583344	588397	-	gi|255953245|ref|XP_002567375.1|	-	-	-
g1593	contig_89	590516	591725	+	gi|255953247|ref|XP_002567376.1|	GO:0016491	D-amino-acid oxidase	KOG3923
g1594	contig_89	592238	593520	-	gi|169779615|ref|XP_001824272.1|	GO:0008270	Translation machinery-associated protein 46	KOG1763
g1595	contig_89	595275	596196	-	gi|584412286|emb|CDM31052.1|	-	Protein wos2	KOG3158
g1596	contig_89	596738	597501	+	gi|255953253|ref|XP_002567379.1|	-	Vacuolar protein-sorting-associated protein 24	KOG3229
g1597	contig_89	598067	600037	+	gi|584412284|emb|CDM31050.1|	GO:0003676	mRNA export protein mlo3	KOG0533
g1598	contig_89	600491	601262	-	gi|425767146|gb|EKV05724.1|	-	Caltractin
g1599	contig_89	602028	603613	+	gi|584412282|emb|CDM31048.1|	-	Desumoylating isopeptidase 1	KOG0907
g1600	contig_89	604544	605635	+	gi|599151414|gb|EYE90854.1|	-	-	-
g1601	contig_89	606204	606940	+	gi|255936221|ref|XP_002559137.1|	-	-	-
g1602	contig_89	607332	608393	-	gi|400600194|gb|EJP67868.1|	GO:0003824	Uncharacterized isomerase slr1019	KOG3033
g1603	contig_89	608826	609833	+	gi|255953261|ref|XP_002567383.1|	GO:0051287	Glycerate dehydrogenase	KOG0067
g1604	contig_89	610037	611793	-	gi|212533813|ref|XP_002147063.1|	-	Glucan endo-1,3-alpha-glucosidase agn1
g1605	contig_89	612818	614512	+	gi|212533807|ref|XP_002147060.1|	GO:0022857	Maltose permease MAL31	KOG0254
g1606	contig_89	615011	616027	-	gi|67900718|ref|XP_680615.1|	-	Probable sucrose utilization protein SUC1
g1607	contig_89	616954	619371	+	gi|212533809|ref|XP_002147061.1|	GO:0004553	Alpha-xylosidase	KOG1066
g1608	contig_89	621909	622541	-	gi|425767150|gb|EKV05728.1|	-	-	-
g1609	contig_89	626815	629249	+	gi|584408827|emb|CDM35740.1|	-	Glutathione transporter 1	KOG2262
g1610	contig_89	629489	630240	-	gi|255936461|ref|XP_002559257.1|	-	FK506-binding protein 1	KOG0544
g1611	contig_89	630493	631587	-	gi|255953267|ref|XP_002567386.1|	-	-	-
g1612	contig_89	632439	634505	-	gi|584412275|emb|CDM31041.1|	GO:0004221	Ubiquitin carboxyl-terminal hydrolase 1	KOG1867
g1613	contig_89	634704	635330	+	gi|584412274|emb|CDM31040.1|	-	-	-
g1614	contig_89	635383	638171	-	gi|255953273|ref|XP_002567389.1|	-	Probable vacuolar protein sorting-associated protein 16 homolog	KOG2280
g1615	contig_89	638382	639818	+	gi|255953275|ref|XP_002567390.1|	-	-	-
g1616	contig_89	639918	641148	-	gi|255949046|ref|XP_002565290.1|	-	NmrA-like family domain-containing protein 1
g1617	contig_89	641544	642953	-	gi|255953277|ref|XP_002567391.1|	-	UPF0187 protein alr2987
g1618	contig_89	643712	644885	+	gi|584411945|emb|CDM30710.1|	-	Uncharacterized protein C16C9.01c
g1619	contig_89	645738	647626	-	gi|255953281|ref|XP_002567393.1|	GO:0005515	E3 ubiquitin-protein ligase DMA1	KOG3872
g1620	contig_89	648767	650819	+	gi|255953283|ref|XP_002567394.1|	GO:0005515	Vacuolar protein 8	KOG4224
g1621	contig_89	651269	651982	+	gi|255953285|ref|XP_002567395.1|	-	Exosome complex component CSL4	KOG3409
g1622	contig_89	652878	656452	-	gi|584412264|emb|CDM31030.1|	GO:0005525	Ribosome assembly protein 1	KOG0467
g1623	contig_89	656817	657343	-	gi|255953289|ref|XP_002567397.1|	-	-	-
g1624	contig_89	657621	659285	+	gi|584412262|emb|CDM31028.1|	-	Pre-mRNA-processing factor 19	KOG0289
g1625	contig_89	659647	660911	+	gi|584412261|emb|CDM31027.1|	-	E3 ubiquitin-protein ligase complex slx8-rfp subunit rfp1
g1626	contig_89	661499	662038	-	gi|425767062|gb|EKV05645.1|	-	54S ribosomal protein L51, mitochondrial	KOG3445
g1627	contig_89	662267	663719	+	gi|119478256|ref|XP_001259339.1|	GO:0003676	U1 small nuclear ribonucleoprotein 70 kDa homolog	KOG0113
g1628	contig_89	664566	665452	-	gi|584412254|emb|CDM31020.1|	-	mRNA turnover protein 4 homolog	KOG0816
g1629	contig_89	665710	667248	+	gi|584412253|emb|CDM31019.1|	-	Mitochondrial distribution and morphology protein 10
g1630	contig_89	667477	668631	-	gi|255953303|ref|XP_002567404.1|	GO:0004807	Triosephosphate isomerase	KOG1643
g1631	contig_89	669239	670342	-	gi|255953305|ref|XP_002567405.1|	-	-	-
g1632	contig_89	671559	672468	-	gi|584412244|emb|CDM31010.1|	-	DOA4-independent degradation protein 4	KOG3230
g1633	contig_89	672703	675657	+	gi|584412243|emb|CDM31009.1|	GO:0005525	Transmembrane GTPase fzo1	KOG0448
g1634	contig_89	676309	678821	-	gi|255953313|ref|XP_002567409.1|	-	S-M checkpoint control protein rad4	KOG1929
g1635	contig_89	679757	682007	+	gi|255953315|ref|XP_002567410.1|	-	DNA repair and recombination protein pif1, mitochondrial	KOG0987
g1636	contig_89	682503	684679	+	gi|255953317|ref|XP_002567411.1|	-	Enhancer of mRNA-decapping protein 3	KOG2585
g1637	contig_89	685635	687471	+	gi|425767075|gb|EKV05658.1|	GO:0003755	Peptidyl-prolyl cis-trans isomerase-like 2	KOG0883
g1638	contig_89	688968	690741	+	gi|255953335|ref|XP_002567420.1|	GO:0003824	Protein phosphatase 2C homolog 1	KOG0698
g1639	contig_89	691534	692664	-	gi|425767019|gb|EKV05604.1|	-	-	-
g1640	contig_89	692964	694824	+	gi|584412233|emb|CDM30999.1|	-	UV radiation resistance-associated gene protein	KOG2896
g1641	contig_89	695243	698495	+	gi|255953329|ref|XP_002567417.1|	GO:0008270	Transcriptional activator ARO80
g1642	contig_89	700101	701392	+	gi|584412230|emb|CDM30996.1|	GO:0004190	Aspartic protease pep1	KOG1339
g1643	contig_89	702306	704711	+	gi|255953323|ref|XP_002567414.1|	-	pH-response regulator protein palH/RIM21
g1644	contig_89	705043	707285	+	gi|584412228|emb|CDM30994.1|	-	-	-
g1645	contig_89	708604	709558	-	gi|584410466|emb|CDM34493.1|	-	-	-
g1646	contig_89	711953	714125	+	gi|584412223|emb|CDM30989.1|	GO:0008270	Transcriptional activator protein acu-15
g1647	contig_89	714381	715808	+	gi|584412222|emb|CDM30988.1|	-	Cytosine deaminase
g1648	contig_89	716060	716667	-	gi|255953419|ref|XP_002567462.1|	GO:0008168	Alpha N-terminal protein methyltransferase 1	KOG3178
g1649	contig_89	717285	718777	+	gi|425767031|gb|EKV05616.1|	-	Probable sugar phosphate/phosphate translocator At4g32390	KOG1441
g1650	contig_89	720810	727559	+	gi|255953429|ref|XP_002567467.1|	GO:0003887	DNA polymerase gamma, mitochondrial	KOG3657
g1651	contig_89	728219	730359	+	gi|425767035|gb|EKV05620.1|	-	-	-
g1652	contig_89	730688	731740	-	gi|255953433|ref|XP_002567469.1|	GO:0016740	NADH dehydrogenase (ubiquinone) complex I, assembly factor 6	KOG4411
g1653	contig_89	732238	735729	+	gi|584412213|emb|CDM30979.1|	GO:0016818	DNA repair protein rad5	KOG1001
g1654	contig_89	736211	736699	-	gi|525583895|gb|EPS30145.1|	-	-	-
g1655	contig_89	740056	742137	+	gi|159128293|gb|EDP53408.1|	GO:0016884	Glutamyl-tRNA(Gln) amidotransferase subunit A	KOG1211
g1656	contig_89	745120	746463	-	gi|146324801|ref|XP_747518.2|	-	N amino acid transport system protein
g1657	contig_89	747799	748931	-	gi|584412212|emb|CDM30978.1|	-	-	-
g1658	contig_89	749812	751807	-	gi|425767039|gb|EKV05624.1|	GO:0005525	GTP-binding protein 1	KOG0463
g1659	contig_89	752350	752818	-	gi|145249892|ref|XP_001401285.1|	-	Probable U6 snRNA-associated Sm-like protein LSm3	KOG3460
g1660	contig_89	753674	755533	+	gi|584412209|emb|CDM30975.1|	-	Pentatricopeptide repeat-containing protein 6, mitochondrial
g1661	contig_89	755876	756814	-	gi|425767042|gb|EKV05627.1|	-	Probable N-acetylglucosaminyl-phosphatidylinositol de-N-acetylase	KOG3332
g1662	contig_89	760558	762162	+	gi|255953447|ref|XP_002567476.1|	-	Uncharacterized protein C1F12.05
g1663	contig_89	762780	766740	+	gi|584411884|emb|CDM30649.1|	GO:0005524	Sensor histidine kinase AruS	KOG0519
g1664	contig_89	767784	769168	-	gi|169764993|ref|XP_001816968.1|	GO:0004497	6-hydroxynicotinate 3-monooxygenase	KOG2614
g1665	contig_89	770068	771549	-	gi|255954141|ref|XP_002567823.1|	-	-	-
g1666	contig_89	773540	775417	+	gi|255954137|ref|XP_002567821.1|	GO:0003824	Putative acyl-coenzyme A synthetase	KOG1176
g1667	contig_89	777745	778653	-	gi|584411890|emb|CDM30655.1|	-	-	-
g1668	contig_89	779120	780678	-	gi|584411891|emb|CDM30656.1|	-	Protein rds1
g1669	contig_89	782422	783406	+	gi|584411893|emb|CDM30658.1|	GO:0016491	Rhamnolipids biosynthesis 3-oxoacyl-[acyl-carrier-protein] reductase	KOG0725
g1670	contig_89	783612	784734	-	gi|255954121|ref|XP_002567813.1|	GO:0016491	UPF0676 protein C1494.01	KOG0143
g1671	contig_89	785163	789896	+	gi|255940988|ref|XP_002561263.1|	GO:0003677	Retrovirus-related Pol polyprotein from transposon TNT 1-94	KOG0017
g1672	contig_89	790310	791608	+	gi|557721504|dbj|GAD99652.1|	-	-	-
g1673	contig_89	793289	794506	-	gi|584411895|emb|CDM30660.1|	-	Serum paraoxonase/lactonase 3
g1674	contig_89	794874	795188	+	gi|255954115|ref|XP_002567810.1|	-	-	-
g1675	contig_89	795701	796921	+	gi|255954113|ref|XP_002567809.1|	GO:0003824	2-amino-3-carboxymuconate-6-semialdehyde decarboxylase	KOG4245
g1676	contig_89	797072	798517	-	gi|584411898|emb|CDM30663.1|	-	-	-
g1677	contig_89	799183	800499	+	gi|425772237|gb|EKV10648.1|	GO:0031072	Pre-mRNA-splicing factor cwf23	KOG0718
g1678	contig_89	800699	802045	-	gi|255954107|ref|XP_002567806.1|	GO:0004047	Putative transferase caf17, mitochondrial	KOG2929
g1679	contig_89	802331	804968	-	gi|584411901|emb|CDM30666.1|	GO:0030145	mRNA decapping complex subunit 2	KOG2937
g1680	contig_89	805673	806587	+	gi|584411902|emb|CDM30667.1|	-	Uncharacterized membrane protein YLR326W
g1681	contig_89	806726	807900	-	gi|255954101|ref|XP_002567803.1|	-	Cytoplasmic tRNA 2-thiolation protein 2	KOG2594
g1682	contig_89	808226	810167	+	gi|425772242|gb|EKV10653.1|	-	Membrane protein PTM1	KOG2568
g1683	contig_89	810932	812578	+	gi|255954089|ref|XP_002567797.1|	-	-	-
g1684	contig_89	812797	814008	-	gi|584411907|emb|CDM30672.1|	-	WD repeat-containing protein 82	KOG1446
g1685	contig_89	814474	815706	+	gi|255954085|ref|XP_002567795.1|	-	Mitochondrial oxaloacetate transport protein	KOG0755
g1686	contig_89	817060	818502	+	gi|255954081|ref|XP_002567793.1|	GO:0004748	Ribonucleoside-diphosphate reductase small chain	KOG1567
g1687	contig_89	818964	819668	-	gi|584411910|emb|CDM30675.1|	GO:0008312	-	-
g1688	contig_89	821346	824475	-	gi|425777427|gb|EKV15601.1|	-	Uncharacterized WD repeat-containing protein C3H5.08c	KOG0283
g1689	contig_89	824700	825340	-	gi|584411913|emb|CDM30678.1|	-	Probable allantoinase 1
g1690	contig_89	826017	829753	+	gi|255954071|ref|XP_002567788.1|	-	-	-
g1691	contig_89	831347	833416	-	gi|425772250|gb|EKV10661.1|	-	-	-
g1692	contig_89	834908	836154	+	gi|584411916|emb|CDM30681.1|	-	Probable tRNA pseudouridine synthase 4	KOG2529
g1693	contig_89	836462	837572	-	gi|584411917|emb|CDM30682.1|	-	rRNA-processing protein EBP2	KOG3080
g1694	contig_89	838381	838788	+	gi|584411918|emb|CDM30683.1|	-	-	-
g1695	contig_89	839311	840515	-	gi|584411919|emb|CDM30684.1|	-	Protein disulfide-isomerase tigA	KOG0191
g1696	contig_89	840887	843421	-	gi|425772255|gb|EKV10666.1|	GO:0004518	Uncharacterized protein C139.01c	KOG2519
g1697	contig_89	844047	845421	+	gi|425772256|gb|EKV10667.1|	GO:0016491	UPF0676 protein C1494.01	KOG0143
g1698	contig_89	846130	848004	-	gi|425772257|gb|EKV10668.1|	GO:0008270	MYND-type zinc finger protein samB
g1699	contig_89	852036	853372	+	gi|343469106|ref|XP_753430.2|	-	Guanine nucleotide-binding protein subunit beta	KOG0286
g1700	contig_89	855667	856714	+	gi|255954049|ref|XP_002567777.1|	-	Phosducin-like protein	KOG3171
g1701	contig_89	857798	861433	-	gi|238499815|ref|XP_002381142.1|	-	Ran-specific GTPase-activating protein 1	KOG3149
g1702	contig_89	861879	864407	-	gi|255954043|ref|XP_002567774.1|	-	-	-
g1703	contig_89	867771	869504	-	gi|255954033|ref|XP_002567769.1|	GO:0000030	O-glycoside alpha-1,2-mannosyltransferase homolog 4	KOG4472
g1704	contig_89	871048	872250	+	gi|255954031|ref|XP_002567768.1|	GO:0005515	Uncharacterized PH domain-containing protein PB16A4.02c
g1705	contig_89	872997	875000	-	gi|584410688|emb|CDM34717.1|	-	UNC93-like protein 1_x0001_sp|Q8LG53.2|UN932_ARATH RecName: Full=UNC93-like protein 2	KOG3098
g1706	contig_89	875526	877167	+	gi|38093228|dbj|BAD00185.1|	GO:0016491	L-saccharopine oxidase	KOG2820
g1707	contig_89	879342	880910	-	gi|255954029|ref|XP_002567767.1|	-	Uncharacterized vacuolar membrane protein YML018C	KOG2765
g1708	contig_89	881545	882519	-	gi|255954027|ref|XP_002567766.1|	-	Probable Ras-related protein Rab7	KOG0394
g1709	contig_89	882731	883492	+	gi|255954025|ref|XP_002567765.1|	-	Autophagy protein 16
g1710	contig_89	883795	885371	-	gi|425772160|gb|EKV10574.1|	GO:0018024	Histone-lysine N-methyltransferase, H3 lysine-79 specific	KOG3924
g1711	contig_89	885712	888356	-	gi|425772161|gb|EKV10575.1|	GO:0008168	AdoMet-dependent rRNA methyltransferase spb1	KOG1098
g1712	contig_89	888632	891342	+	gi|255954019|ref|XP_002567762.1|	-	Uncharacterized protein YML020W
g1713	contig_89	891792	894449	-	gi|584411940|emb|CDM30705.1|	GO:0008270	-	-
g1714	contig_89	895179	896717	-	gi|255954015|ref|XP_002567760.1|	-	Increased rDNA silencing protein 4	KOG0998
g1715	contig_89	896903	897466	-	gi|255935763|ref|XP_002558908.1|	-	-	-
g1716	contig_89	898218	901556	+	gi|255954013|ref|XP_002567759.1|	GO:0008270	Zinc finger protein rst2	KOG1721
g1717	contig_89	902131	905507	+	gi|584411944|emb|CDM30709.1|	GO:0005524	DNA ligase 4	KOG0966
g1718	contig_89	906566	908002	-	gi|584411946|emb|CDM30711.1|	-	-	-
g1719	contig_89	910376	913121	+	gi|584411947|emb|CDM30712.1|	GO:0008270	Nitrogen assimilation transcription factor nirA
g1720	contig_89	913438	914922	-	gi|525586287|gb|EPS32537.1|	-	Bypass of stop codon protein 6
g1721	contig_89	915299	915780	+	gi|255953999|ref|XP_002567752.1|	GO:0003743	S1-like domain-containing protein C146.08c	KOG2925
g1722	contig_89	915910	917283	-	gi|425772174|gb|EKV10588.1|	GO:0016758	Dol-P-Man:Man(5)GlcNAc(2)-PP-Dol alpha-1,3-mannosyltransferase	KOG2762
g1723	contig_89	917610	918035	-	gi|255954003|ref|XP_002567754.1|	-	-	-
g1724	contig_89	918454	919854	+	gi|425772172|gb|EKV10586.1|	GO:0016787	Serine/threonine-protein phosphatase 4 catalytic subunit	KOG0372
g1725	contig_89	920717	922030	-	gi|169782954|ref|XP_001825939.1|	GO:0030170	1-aminocyclopropane-1-carboxylate synthase-like protein 1	KOG0256
g1726	contig_89	926467	930272	+	gi|255953997|ref|XP_002567751.1|	GO:0005524	Protein kinase C-like	KOG0694
g1727	contig_89	931046	933209	+	gi|584411955|emb|CDM30720.1|	-	-	-
g1728	contig_89	933647	935133	+	gi|255953993|ref|XP_002567749.1|	GO:0015297	Uncharacterized transporter YDR338C	KOG1347
g1729	contig_89	935369	939277	+	gi|584411957|emb|CDM30722.1|	-	Tubulin-specific chaperone D	KOG1943
g1730	contig_89	939503	940339	-	gi|119489946|ref|XP_001262930.1|	-	-	-
g1731	contig_89	940690	943582	+	gi|119489948|ref|XP_001262931.1|	GO:0008168	3-isopropylmalate/3-methylmalate dehydrogenase	KOG0785
g1732	contig_89	943691	944500	-	gi|425781964|gb|EKV19898.1|	-	-	-
g1733	contig_89	946377	947342	-	gi|525587026|gb|EPS33276.1|	-	Probable feruloyl esterase C
g1734	contig_89	948207	949093	+	gi|525587025|gb|EPS33275.1|	-	-	-
g1735	contig_89	949665	950717	+	gi|425772063|gb|EKV10488.1|	GO:0003676	U1 small nuclear ribonucleoprotein usp102	KOG4206
g1736	contig_89	951013	952200	-	gi|255953985|ref|XP_002567745.1|	GO:0046961	V-type proton ATPase subunit D	KOG1647
g1737	contig_89	952564	955263	+	gi|425772065|gb|EKV10490.1|	-	Pre-mRNA-splicing factor syf1	KOG2047
g1738	contig_89	956362	961360	-	gi|584411962|emb|CDM30727.1|	GO:0005086	Uncharacterized protein C211.03	KOG0928
g1739	contig_89	962511	967219	+	gi|255953979|ref|XP_002567742.1|	GO:0005089	Rho guanine nucleotide exchange factor gef2
g1740	contig_89	967561	974808	-	gi|255953973|ref|XP_002567739.1|	GO:0008270	Probable tRNA(Ile)-lysidine synthase
g1741	contig_89	976729	982296	-	gi|255953971|ref|XP_002567738.1|	-	UBP9-binding protein bun107	KOG0308
g1742	contig_89	982855	985428	-	gi|425772074|gb|EKV10499.1|	GO:0005524	Serine/threonine-protein kinase oca2	KOG0590
g1743	contig_89	986923	987435	-	gi|584411971|emb|CDM30736.1|	GO:0003735	54S ribosomal protein L19, mitochondrial	KOG3257
g1744	contig_89	987795	989201	+	gi|255953961|ref|XP_002567733.1|	-	Survival factor 1
g1745	contig_89	989694	1002847	-	gi|425772077|gb|EKV10502.1|	GO:0016887	Dynein heavy chain, cytoplasmic	KOG3595
g1746	contig_89	1003452	1008668	-	gi|584411974|emb|CDM30739.1|	GO:0016891	Dicer-like protein 1	KOG0701
g1747	contig_89	1009193	1010369	+	gi|255953955|ref|XP_002567730.1|	-	Uncharacterized protein C63.05	KOG2830
g1748	contig_89	1010563	1011641	-	gi|584411976|emb|CDM30741.1|	-	Porphobilinogen deaminase	KOG2892
g1749	contig_89	1012208	1015097	+	gi|255953951|ref|XP_002567728.1|	GO:0005524	Lon protease homolog 2, peroxisomal	KOG2004
g1750	contig_89	1015520	1016502	-	gi|255953949|ref|XP_002567727.1|	GO:0003735	54S ribosomal protein L23, mitochondrial	KOG4089
g1751	contig_89	1016834	1018212	-	gi|255953943|ref|XP_002567724.1|	GO:0005524	Serine/threonine-protein kinase rio2	KOG2268
g1752	contig_89	1018707	1021702	-	gi|425771999|gb|EKV10426.1|	-	26S proteasome regulatory subunit rpn-1	KOG2005
g1753	contig_89	1022070	1024207	-	gi|255953939|ref|XP_002567722.1|	-	-	-
g1754	contig_89	1024425	1026909	+	gi|584411982|emb|CDM30747.1|	GO:0030983	DNA mismatch repair protein MLH1	KOG1979
g1755	contig_89	1028032	1030324	-	gi|584411983|emb|CDM30748.1|	GO:0008138	Dual specificity protein phosphatase PPS1	KOG1716
g1756	contig_89	1033978	1035427	+	gi|584411984|emb|CDM30749.1|	-	Autophagy-related protein 18	KOG2110
g1757	contig_89	1036168	1036840	-	gi|425772004|gb|EKV10431.1|	-	Uncharacterized calcium-binding protein C613.03
g1758	contig_89	1037127	1039370	+	gi|255953925|ref|XP_002567715.1|	-	-	-
g1759	contig_89	1039860	1042252	-	gi|255953923|ref|XP_002567714.1|	GO:0008026	Pre-mRNA-splicing factor ATP-dependent RNA helicase PRP43	KOG0925
g1760	contig_89	1042593	1045329	+	gi|255953921|ref|XP_002567713.1|	GO:0008168	Protein arginine N-methyltransferase skb1	KOG0822
g1761	contig_89	1046218	1047245	+	gi|48429006|sp|P61869.1|MDLA_PENCY	GO:0004806	Mono- and diacylglycerol lipase	KOG4569
g1762	contig_89	1048447	1048953	+	gi|584411991|emb|CDM30756.1|	-	-	-
g1763	contig_89	1050431	1051659	+	gi|255953913|ref|XP_002567709.1|	-	-	-
g1764	contig_89	1052224	1054234	+	gi|255953911|ref|XP_002567708.1|	-	Choline transport protein	KOG1289
g1765	contig_89	1055731	1056220	-	gi|255953909|ref|XP_002567707.1|	-	-	-
g1766	contig_89	1060278	1062292	+	gi|584411995|emb|CDM30760.1|	-	Uncharacterized transporter YIL166C	KOG2533
g1767	contig_89	1063006	1064259	+	gi|255953905|ref|XP_002567705.1|	GO:0016491	Alpha-ketoglutarate-dependent taurine dioxygenase
g1768	contig_89	1065244	1068995	-	gi|425772014|gb|EKV10441.1|	GO:0008889	Glycerophosphodiester phosphodiesterase GDE1	KOG1162
g1769	contig_89	1070359	1072928	-	gi|255953877|ref|XP_002567691.1|	-	Ring assembly protein 3	KOG4151
g1770	contig_89	1073850	1074569	+	gi|255956893|ref|XP_002569199.1|	-	-	-
g1771	contig_89	1075087	1076278	+	gi|255953875|ref|XP_002567690.1|	GO:0016251	RNA polymerase II transcription factor B subunit 4	KOG2487
g1772	contig_89	1076764	1078355	-	gi|584412010|emb|CDM30775.1|	GO:0016787	Putative threonine aspartase	KOG1592
g1773	contig_89	1079199	1080715	+	gi|425772018|gb|EKV10445.1|	-	Actin-related protein 3	KOG0678
g1774	contig_89	1081116	1082741	-	gi|584412012|emb|CDM30777.1|	GO:0008173	tRNA (uracil(54)-C(5))-methyltransferase	KOG2187
g1775	contig_89	1083101	1084367	+	gi|425772020|gb|EKV10447.1|	GO:0003735	37S ribosomal protein S5, mitochondrial	KOG2646
g1776	contig_89	1084661	1085295	-	gi|584412014|emb|CDM30779.1|	-	-	-
g1777	contig_89	1089343	1091097	+	gi|255953863|ref|XP_002567684.1|	GO:0020037	Delta(8)-fatty-acid desaturase	KOG4232
g1778	contig_89	1091991	1094028	-	gi|255953861|ref|XP_002567683.1|	GO:0005524	Serine/threonine-protein kinase nrc-2	KOG0610
g1779	contig_89	1094710	1099229	-	gi|255953857|ref|XP_002567681.1|	GO:0003993	-	-
g1780	contig_89	1100238	1102988	+	gi|584412020|emb|CDM30785.1|	GO:0042162	Telomeric DNA-binding factor trf1
g1781	contig_89	1103437	1104392	+	gi|584412021|emb|CDM30786.1|	GO:0003702	Transcription initiation factor TFIID subunit 10	KOG3423
g1782	contig_89	1105144	1105604	-	gi|121713664|ref|XP_001274443.1|	GO:0003735	37S ribosomal protein S19, mitochondrial	KOG0899
g1783	contig_89	1105842	1107257	-	gi|425771896|gb|EKV10325.1|	GO:0008440	Inositol polyphosphate multikinase	KOG1620
g1784	contig_89	1107820	1110411	+	gi|584412024|emb|CDM30789.1|	-	Argonaute-binding protein 1
g1785	contig_89	1111024	1112129	-	gi|584412025|emb|CDM30790.1|	GO:0016491	Probable quinone oxidoreductase	KOG1197
g1786	contig_89	1113472	1115790	+	gi|255953843|ref|XP_002567674.1|	-	-	-
g1787	contig_89	1116656	1118415	-	gi|584412027|emb|CDM30792.1|	-	Protein clp1	KOG2749
g1788	contig_89	1119590	1121225	-	gi|584412028|emb|CDM30793.1|	-	Bouquet formation protein 4
g1789	contig_89	1122351	1123116	+	gi|425771902|gb|EKV10331.1|	GO:0005094	Rho GDP-dissociation inhibitor	KOG3205
g1790	contig_89	1123432	1124564	-	gi|145255289|ref|XP_001398918.1|	GO:0016787	Putative serine/threonine-protein phosphatase C22H10.04	KOG0372
g1791	contig_89	1125264	1126565	-	gi|255953825|ref|XP_002567665.1|	GO:0016787	Uncharacterized protein YJL213W
g1792	contig_89	1127121	1128749	+	gi|599153753|gb|EYE93028.1|	GO:0022857	Maltose permease MAL61	KOG0254
g1793	contig_89	1130267	1132908	-	gi|584412033|emb|CDM30798.1|	-	AP-3 complex subunit beta-2	KOG1060
g1794	contig_89	1133186	1133827	+	gi|255953821|ref|XP_002567663.1|	-	-	-
g1795	contig_89	1133964	1135539	-	gi|584412035|emb|CDM30800.1|	-	Probable kinetochore protein nuf2	KOG4438
g1796	contig_89	1135746	1136856	+	gi|255953817|ref|XP_002567661.1|	-	Translation initiation factor eIF-2B subunit alpha	KOG1466
g1797	contig_89	1143226	1145080	+	gi|324029091|gb|ADY16699.1|	-	Putative HC-toxin efflux carrier TOXA	KOG0254
g1798	contig_89	1149158	1151389	+	gi|255953811|ref|XP_002567658.1|	-	-	-
g1799	contig_89	1152357	1152926	+	gi|425771913|gb|EKV10342.1|	-	Thioredoxin	KOG0907
g1800	contig_89	1155874	1158385	+	gi|584412042|emb|CDM30807.1|	-	Signaling protein YkoW
g1801	contig_89	1158851	1159555	-	gi|425771916|gb|EKV10345.1|	-	Protein OPI10	KOG4067
g1802	contig_89	1159752	1160772	+	gi|584412044|emb|CDM30809.1|	GO:0016787	Uncharacterized protein YJR142W	KOG4313
g1803	contig_89	1162805	1163316	-	gi|425771918|gb|EKV10347.1|	-	DNA-directed RNA polymerases I, II, and III subunit RPABC3	KOG3400
g1804	contig_89	1163591	1164810	+	gi|255953795|ref|XP_002567650.1|	-	Elongator complex protein 4	KOG3949
g1805	contig_89	1164832	1165139	-	gi|584412047|emb|CDM30812.1|	-	-	-
g1806	contig_89	1165628	1166581	+	gi|255953791|ref|XP_002567648.1|	GO:0000213	Probable tRNA-splicing endonuclease subunit sen-34	KOG4133
g1807	contig_89	1167066	1167868	-	gi|255953789|ref|XP_002567647.1|	GO:0004540	Ribonuclease P protein subunit p29	KOG4046
g1808	contig_89	1168283	1169425	+	gi|584412050|emb|CDM30815.1|	GO:0016491	UPF0676 protein C1494.01	KOG0143
g1809	contig_89	1172447	1173596	-	gi|584412051|emb|CDM30816.1|	-	-	-
g1810	contig_89	1176853	1177560	-	gi|255953777|ref|XP_002567641.1|	GO:0003779	Actin-depolymerizing factor gmf1	KOG1736
g1811	contig_89	1177800	1178978	+	gi|584412054|emb|CDM30819.1|	-	Uncharacterized protein YMR178W	KOG2644
g1812	contig_89	1179844	1180739	-	gi|255953773|ref|XP_002567639.1|	-	Ras-like protein	KOG0395
g1813	contig_89	1182559	1183434	-	gi|119490138|ref|XP_001262983.1|	GO:0004764	Pentafunctional AROM polypeptide	KOG0692
g1814	contig_89	1183704	1184633	+	gi|573053333|gb|ETS73327.1|	GO:0004764	Quinate dehydrogenase	KOG0692
g1815	contig_89	1184911	1185665	+	gi|119490134|ref|XP_001262981.1|	-	Uncharacterized protein AN9274
g1816	contig_89	1185782	1186804	-	gi|584412058|emb|CDM30823.1|	-	3-dehydroshikimate dehydratase
g1817	contig_89	1188079	1190419	-	gi|146323515|ref|XP_754142.2|	GO:0005524	Quinate repressor protein	KOG0692
g1818	contig_89	1191577	1192622	+	gi|145258753|ref|XP_001402166.1|	-	-	-
g1819	contig_89	1193436	1196791	-	gi|302501053|ref|XP_003012519.1|	GO:0005524	Nephrocystin-3	KOG1840
g1820	contig_89	1197650	1199454	+	gi|296808005|ref|XP_002844341.1|	GO:0020037	Cytochrome P450 52A13	KOG0157
g1821	contig_89	1201296	1202920	-	gi|350631291|gb|EHA19662.1|	-	-	-
g1822	contig_89	1203229	1205340	+	gi|358365609|dbj|GAA82231.1|	GO:0005524	Serine/threonine-protein kinase RAD53	KOG0615
g1823	contig_89	1207250	1207652	-	gi|358365607|dbj|GAA82229.1|	-	-	-
g1824	contig_89	1208707	1210575	+	gi|255956729|ref|XP_002569117.1|	-	Protein RRNAD1	KOG2651
g1825	contig_89	1211779	1213904	-	gi|119499225|ref|XP_001266370.1|	GO:0016887	ATP-binding cassette sub-family G member 2	KOG0061
g1826	contig_89	1215430	1217612	+	gi|119499223|ref|XP_001266369.1|	-	Fusicoccadiene synthase	KOG0777
g1827	contig_89	1218957	1223312	-	gi|584413745|emb|CDM32521.1|	GO:0042626	Leptomycin B resistance protein pmd1	KOG0055
g1828	contig_89	1224181	1240291	+	gi|255938141|ref|XP_002559841.1|	GO:0048037	HC-toxin synthetase	KOG1178
g1829	contig_89	1242063	1244354	+	gi|255955027|ref|XP_002568266.1|	GO:0008270	-	-
g1830	contig_89	1246004	1249966	+	gi|242778412|ref|XP_002479233.1|	GO:0042626	Canalicular multispecific organic anion transporter 1	KOG0054
g1831	contig_89	1250306	1251570	-	gi|594714483|gb|EXU97404.1|	-	-	-
g1832	contig_89	1253377	1254634	-	gi|425771884|gb|EKV10315.1|	-	-	-
g1833	contig_89	1256233	1257022	+	gi|255953767|ref|XP_002567636.1|	-	-	-
g1834	contig_89	1257298	1258330	-	gi|255953765|ref|XP_002567635.1|	GO:0016491	Uncharacterized oxidoreductase C521.03	KOG1205
g1835	contig_89	1259280	1260944	+	gi|584412063|emb|CDM30828.1|	-	-	-
g1836	contig_89	1261920	1263141	-	gi|425771813|gb|EKV10246.1|	-	Uncharacterized MFS-type transporter C18.02	KOG3764
g1837	contig_89	1265099	1265671	+	gi|255953711|ref|XP_002567608.1|	-	Golgi apparatus membrane protein tvp15
g1838	contig_89	1267239	1268922	+	gi|584412084|emb|CDM30849.1|	GO:0043565	GATA factor SREP	KOG1601
g1839	contig_89	1269867	1271637	-	gi|378731989|gb|EHY58448.1|	-	Lipase 4	KOG4389
g1840	contig_89	1278003	1279383	+	gi|255953733|ref|XP_002567619.1|	-	-	-
g1841	contig_89	1280220	1282046	-	gi|255953735|ref|XP_002567620.1|	-	Uncharacterized MFS-type transporter C1683.03c	KOG0254
g1842	contig_89	1283219	1284002	-	gi|119479343|ref|XP_001259700.1|	GO:0016491	Putative nitroreductase HBN1
g1843	contig_89	1284478	1286537	-	gi|242774079|ref|XP_002478370.1|	-	-	-
g1844	contig_89	1287013	1288486	+	gi|242774084|ref|XP_002478371.1|	GO:0015205	Uncharacterized permease C1683.05	KOG2466
g1845	contig_89	1289239	1290638	-	gi|242774089|ref|XP_002478372.1|	GO:0016491	Putative dioxygenase C576.01c
g1846	contig_89	1290938	1291792	+	gi|242774094|ref|XP_002478373.1|	-	2-hydroxy-6-oxo-2,4-heptadienoate hydrolase	KOG1535
g1847	contig_89	1292474	1293881	+	gi|242774100|ref|XP_002478374.1|	GO:0016491	Putative dioxygenase C576.01c
g1848	contig_89	1294956	1296397	-	gi|587682377|gb|EWZ28982.1|	-	Uncharacterized transporter C36.02c	KOG0255
g1849	contig_89	1299819	1300262	-	gi|557727925|dbj|GAD93505.1|	-	-	-
g1850	contig_89	1300594	1301262	+	gi|134081115|emb|CAK41626.1|	GO:0016787	-	-
g1851	contig_89	1302614	1303599	-	gi|425771807|gb|EKV10240.1|	-	-	-
g1852	contig_89	1305507	1307258	+	gi|255953743|ref|XP_002567624.1|	GO:0050660	Bifunctional solanapyrone synthase
g1853	contig_89	1308541	1309996	+	gi|317139316|ref|XP_001817421.2|	-	-	-
g1854	contig_89	1311009	1312692	-	gi|255953747|ref|XP_002567626.1|	-	Thiamine pathway transporter THI73	KOG2533
g1855	contig_89	1313208	1314579	+	gi|525585676|gb|EPS31926.1|	-	-	-
g1856	contig_89	1315457	1319376	+	gi|255953753|ref|XP_002567629.1|	GO:0004497	-	-
g1857	contig_89	1319453	1320833	-	gi|584412069|emb|CDM30834.1|	GO:0016491	Putative dioxygenase C576.01c
g1858	contig_89	1321226	1325135	+	gi|584412065|emb|CDM30830.1|	GO:0016491	Uncharacterized transporter C460.05	KOG2533
g1859	contig_89	1325243	1325962	-	gi|255953707|ref|XP_002567606.1|	-	-	-
g1860	contig_89	1326134	1327514	-	gi|255953705|ref|XP_002567605.1|	GO:0016491	D-amino-acid oxidase	KOG3923
g1861	contig_89	1328959	1330537	+	gi|255953703|ref|XP_002567604.1|	-	-	-
g1862	contig_89	1331157	1332082	-	gi|255953699|ref|XP_002567602.1|	-	Putative glutamine amidotransferase-like protein C13C5.04	KOG3179
g1863	contig_89	1334114	1338023	+	gi|584412091|emb|CDM30856.1|	GO:0008270	ASTRA-associated protein 1
g1864	contig_89	1338101	1340356	-	gi|255953689|ref|XP_002567597.1|	GO:0008026	ATP-dependent RNA helicase dbp7	KOG0348
g1865	contig_89	1341649	1342834	-	gi|584412095|emb|CDM30860.1|	GO:0004592	Pantoate--beta-alanine ligase	KOG3042
g1866	contig_89	1343129	1345827	+	gi|584412096|emb|CDM30861.1|	GO:0008415	Dihydroxyacetone phosphate acyltransferase	KOG3730
g1867	contig_89	1349016	1352828	-	gi|255953679|ref|XP_002567592.1|	-	-	-
g1868	contig_89	1354051	1354716	+	gi|255953677|ref|XP_002567591.1|	-	NADH-ubiquinone oxidoreductase 17.8 kDa subunit, mitochondrial
g1869	contig_89	1354924	1356284	-	gi|425771828|gb|EKV10261.1|	-	Histidine protein methyltransferase 1	KOG2920
g1870	contig_89	1356760	1358126	-	gi|425777176|gb|EKV15360.1|	GO:0030170	Cystathionine gamma-lyase	KOG0053
g1871	contig_89	1358719	1359593	-	gi|584412102|emb|CDM30867.1|	GO:0003899	DNA-directed RNA polymerase III subunit rpc8	KOG3297
g1872	contig_89	1359893	1361693	+	gi|584412103|emb|CDM30868.1|	GO:0008270	-	-
g1873	contig_89	1362367	1363062	+	gi|255953667|ref|XP_002567586.1|	-	-	-
g1874	contig_89	1364836	1366034	+	gi|584412105|emb|CDM30870.1|	-	-	-
g1875	contig_89	1367250	1368481	-	gi|525579737|gb|EPS25987.1|	-	-	-
g1876	contig_89	1369367	1370272	-	gi|255953659|ref|XP_002567582.1|	-	-	-
g1877	contig_89	1371314	1372152	-	gi|255954669|ref|XP_002568087.1|	-	-	-
g1878	contig_89	1373049	1375119	-	gi|584408812|emb|CDM35725.1|	GO:0043169	Alpha-amylase A type-3	KOG0471
g1879	contig_89	1376470	1384324	+	gi|255954673|ref|XP_002568089.1|	GO:0043169	Cell wall alpha-1,3-glucan synthase mok13
g1880	contig_89	1384997	1385813	+	gi|255954675|ref|XP_002568090.1|	-	-	-
g1881	contig_89	1386139	1387833	-	gi|255937577|ref|XP_002559815.1|	-	-	-
g1882	contig_89	1388548	1390375	-	gi|615439580|ref|XP_007591210.1|	GO:0020037	Trichodiene oxygenase	KOG0156
g1883	contig_89	1390723	1392325	-	gi|615439553|ref|XP_007591202.1|	GO:0020037	Trichodiene oxygenase	KOG0156
g1884	contig_89	1392549	1393479	+	gi|407923287|gb|EKG16365.1|	-	Uncharacterized hydrolase C22A12.06c	KOG2551
g1885	contig_89	1393584	1395490	-	gi|531866938|gb|EQL03717.1|	-	NmrA-like family domain-containing protein 1
g1886	contig_89	1396724	1398346	-	gi|315047769|ref|XP_003173259.1|	-	-	-
g1887	contig_89	1400511	1401995	-	gi|615439583|ref|XP_007591211.1|	GO:0050660	6-hydroxy-D-nicotine oxidase
g1888	contig_89	1402656	1404595	+	gi|539440520|gb|ERF75984.1|	-	Putative HC-toxin efflux carrier TOXA	KOG0254
g1889	contig_89	1405266	1406141	+	gi|255935657|ref|XP_002558855.1|	-	Transmembrane protein 53
g1890	contig_89	1406368	1407326	-	gi|407923274|gb|EKG16353.1|	-	Uncharacterized 31.7 kDa protein in traX-finO intergenic region
g1891	contig_89	1408205	1416502	+	gi|615404786|ref|XP_007581490.1|	GO:0048037	Nonribosomal peptide synthetase 14	KOG1202
g1892	contig_89	1419467	1421100	-	gi|425771836|gb|EKV10269.1|	-	Nucleolar protein 12	KOG0118
g1893	contig_89	1422450	1424731	+	gi|255953653|ref|XP_002567579.1|	-	Transcriptional regulatory protein dep1
g1894	contig_89	1427418	1430078	-	gi|425771840|gb|EKV10273.1|	-	mRNA cleavage and polyadenylation specificity factor complex subunit pta1	KOG1895
g1895	contig_89	1430575	1431016	+	gi|584412115|emb|CDM30880.1|	-	-	-
g1896	contig_89	1431539	1434074	-	gi|255953635|ref|XP_002567570.1|	GO:0004576	Dolichyl-diphosphooligosaccharide--protein glycosyltransferase subunit stt3	KOG2292
g1897	contig_89	1435598	1436049	-	gi|255953631|ref|XP_002567568.1|	GO:0015078	ATP synthase subunit e, mitochondrial
g1898	contig_89	1436300	1438504	+	gi|255953629|ref|XP_002567567.1|	-	Cytoplasmic dynein 1 intermediate chain 1	KOG1587
g1899	contig_89	1439740	1441132	+	gi|584412121|emb|CDM30886.1|	-	-	-
g1900	contig_89	1441826	1442956	+	gi|255953623|ref|XP_002567564.1|	-	-	-
g1901	contig_89	1443441	1444367	+	gi|255953621|ref|XP_002567563.1|	-	-	-
g1902	contig_89	1445054	1447517	+	gi|255953619|ref|XP_002567562.1|	GO:0000030	Dolichyl-phosphate-mannose--protein mannosyltransferase 4	KOG3359
g1903	contig_89	1448780	1451764	+	gi|584412126|emb|CDM30891.1|	-	-	-
g1904	contig_89	1453401	1459155	+	gi|425766843|gb|EKV05437.1|	GO:0046983	Actin cytoskeleton-regulatory complex protein pan1	KOG0998
g1905	contig_89	1459678	1462829	-	gi|255953591|ref|XP_002567548.1|	-	Putative cation exchanger C3A12.06c	KOG2399
g1906	contig_89	1463356	1466058	+	gi|255953589|ref|XP_002567547.1|	-	Condensin complex subunit 2	KOG2328
g1907	contig_89	1466772	1468336	-	gi|425766838|gb|EKV05432.1|	-	-	-
g1908	contig_89	1471405	1473204	+	gi|255953583|ref|XP_002567544.1|	-	Transcriptional regulator CRZ1	KOG1721
g1909	contig_89	1474892	1477581	-	gi|584412141|emb|CDM30907.1|	-	-	-
g1910	contig_89	1478108	1481013	+	gi|425766907|gb|EKV05499.1|	GO:0003824	Putative alpha,alpha-trehalose-phosphate synthase [UDP-forming] 106 kDa subunit	KOG1050
g1911	contig_89	1483149	1483784	+	gi|584411015|emb|CDM35050.1|	-	Uncharacterized hemerythrin-like protein C869.06c
g1912	contig_89	1485820	1490048	+	gi|255953569|ref|XP_002567537.1|	-	-	-
g1913	contig_89	1490238	1490927	-	gi|255953567|ref|XP_002567536.1|	-	-	-
g1914	contig_89	1491647	1492343	+	gi|425766936|gb|EKV05526.1|	-	-	-
g1915	contig_89	1492774	1494221	+	gi|584412147|emb|CDM30913.1|	GO:0005515	Eukaryotic translation initiation factor 3 subunit M	KOG2753
g1916	contig_89	1494707	1495342	-	gi|255953561|ref|XP_002567533.1|	GO:0019205	Uridylate kinase	KOG3079
g1917	contig_89	1495530	1495772	-	gi|525579697|gb|EPS25947.1|	-	-	-
g1918	contig_89	1498697	1499600	-	gi|584412149|emb|CDM30915.1|	GO:0016787	Acetylxylan esterase 2
g1919	contig_89	1500409	1501348	-	gi|584412150|emb|CDM30916.1|	-	Family of serine hydrolases 2
g1920	contig_89	1501879	1508769	+	gi|584412151|emb|CDM30917.1|	GO:0048037	Lovastatin nonaketide synthase	KOG1202
g1921	contig_89	1509695	1510727	+	gi|599157472|gb|EYE96581.1|	GO:0008199	-	-
g1922	contig_89	1511743	1513377	-	gi|425766928|gb|EKV05518.1|	GO:0016773	Hexokinase-1	KOG1369
g1923	contig_89	1515639	1516740	+	gi|119482590|ref|XP_001261323.1|	-	Lipase B
g1924	contig_89	1517613	1519683	+	gi|584412156|emb|CDM30922.1|	-	-	-
g1925	contig_89	1521367	1522394	-	gi|255953541|ref|XP_002567523.1|	GO:0016491	NADH-cytochrome b5 reductase 2	KOG0534
g1926	contig_89	1523718	1524492	-	gi|255953539|ref|XP_002567522.1|	GO:0017172	Cysteine dioxygenase	KOG4064
g1927	contig_89	1525795	1527591	-	gi|584412159|emb|CDM30925.1|	GO:0008270	-	-
g1928	contig_89	1528492	1529461	-	gi|584412164|emb|CDM30930.1|	-	-	-
g1929	contig_89	1529834	1530746	+	gi|255953531|ref|XP_002567518.1|	-	-	-
g1930	contig_89	1531741	1532989	-	gi|425766999|gb|EKV05587.1|	-	Phospho-2-dehydro-3-deoxyheptonate aldolase, tyrosine-inhibited
g1931	contig_89	1535396	1536383	+	gi|255953525|ref|XP_002567515.1|	GO:0004523	Ribonuclease H	KOG3752
g1932	contig_89	1536966	1538207	+	gi|425766996|gb|EKV05584.1|	GO:0016747	3-ketoacyl-CoA thiolase, peroxisomal	KOG1389
g1933	contig_89	1538385	1539586	-	gi|115387141|ref|XP_001211076.1|	GO:0016491	Short-chain dehydrogenase TIC 32, chloroplastic	KOG1208
g1934	contig_89	1540178	1541495	+	gi|584412169|emb|CDM30935.1|	-	-	-
g1935	contig_89	1541987	1543076	-	gi|255953519|ref|XP_002567512.1|	-	Replication termination factor 2	KOG3113
g1936	contig_89	1543211	1545092	+	gi|584412171|emb|CDM30937.1|	-	Glucosidase 2 subunit beta	KOG2397
g1937	contig_89	1552357	1554616	+	gi|584412176|emb|CDM30942.1|	GO:0016779	Poly(A) RNA polymerase protein 1	KOG1906
g1938	contig_89	1555608	1557029	-	gi|255953509|ref|XP_002567507.1|	-	D-arabinose 1-dehydrogenase	KOG1576
g1939	contig_89	1557777	1558251	-	gi|584412178|emb|CDM30944.1|	-	Mitochondrial import inner membrane translocase subunit tim16	KOG3442
g1940	contig_89	1558643	1560521	+	gi|255953505|ref|XP_002567505.1|	-	Peroxisomal membrane protein PEX30
g1941	contig_89	1560847	1562802	-	gi|584412181|emb|CDM30947.1|	GO:0008270	Acriflavine sensitivity control protein acr-2
g1942	contig_89	1563383	1565605	+	gi|255953499|ref|XP_002567502.1|	GO:0048038	Copper amine oxidase 1	KOG1186
g1943	contig_89	1566265	1567368	-	gi|255953497|ref|XP_002567501.1|	-	-	-
g1944	contig_89	1567941	1569036	-	gi|425766981|gb|EKV05569.1|	-	Protein big1
g1945	contig_89	1569234	1569930	+	gi|584412185|emb|CDM30951.1|	-	Nucleolar protein 12
g1946	contig_89	1570227	1570917	-	gi|584412186|emb|CDM30952.1|	-	Tropomyosin-1	KOG1003
g1947	contig_89	1571346	1572665	+	gi|255953489|ref|XP_002567497.1|	-	-	-
g1948	contig_89	1573679	1575349	+	gi|255953487|ref|XP_002567496.1|	-	Cyclopropane-fatty-acyl-phospholipid synthase
g1949	contig_89	1576221	1578041	-	gi|325088233|gb|EGC41543.1|	-	-	-
g1950	contig_89	1578732	1580904	+	gi|391873212|gb|EIT82274.1|	GO:0016841	Phenylalanine/tyrosine ammonia-lyase	KOG0222
g1951	contig_89	1581818	1583312	-	gi|584412189|emb|CDM30955.1|	-	Protein ERD1 homolog 1	KOG1162
g1952	contig_89	1584041	1585168	+	gi|255953483|ref|XP_002567494.1|	-	Peroxisome biogenesis factor 10	KOG0317
g1953	contig_89	1585663	1589867	-	gi|425766974|gb|EKV05562.1|	GO:0008408	Werner syndrome ATP-dependent helicase homolog	KOG4373
g1954	contig_89	1590418	1591100	+	gi|255953479|ref|XP_002567492.1|	-	U6 snRNA-associated Sm-like protein LSm5_x0001_sp|P62322.2|LSM5_MOUSE RecName: Full=U6 snRNA-associated Sm-like protein LSm5_x0001_sp|Q5R628.3|LSM5_PONAB RecName: Full=U6 snRNA-associated Sm-like protein LSm5_x0001_sp|Q2HJH0.3|LSM5_BOVIN RecName: Full=U6 snRNA-associated Sm-like protein LSm5	KOG1775
g1955	contig_89	1594742	1596602	+	gi|584412194|emb|CDM30960.1|	-	General amino-acid permease GAP1	KOG1286
g1956	contig_89	1597516	1600300	+	gi|425766971|gb|EKV05559.1|	-	Rho-GTPase-activating protein 8
g1957	contig_89	1601367	1602763	+	gi|425767054|gb|EKV05639.1|	GO:0003824	L-rhamnono-gamma-lactonase
g1958	contig_89	1602819	1606310	-	gi|584412198|emb|CDM30964.1|	GO:0016491	3-oxoacyl-[acyl-carrier-protein] reductase FabG	KOG0725
g1959	contig_89	1607132	1608542	+	gi|615406011|ref|XP_007581878.1|	-	-	-
g1960	contig_89	1609331	1610722	-	gi|584412199|emb|CDM30965.1|	-	L-rhamnonate dehydratase
g1961	contig_89	1611414	1614138	+	gi|255953465|ref|XP_002567485.1|	GO:0008270	Uncharacterized transcriptional regulatory protein C757.04
g1962	contig_89	1615472	1617654	-	gi|425767049|gb|EKV05634.1|	GO:0005524	Serine/threonine-protein kinase svkA	KOG0201
g1963	contig_89	1619072	1620671	-	gi|584412202|emb|CDM30968.1|	GO:0005515	UBX domain-containing protein 5	KOG1364
g1964	contig_89	1621078	1623098	+	gi|584412203|emb|CDM30969.1|	GO:0005524	Cell division control protein 18	KOG2227
g1965	contig_89	1623408	1625199	-	gi|557726769|dbj|GAD94611.1|	-	Uncharacterized protein YEL023C
g1966	contig_89	1629961	1630995	+	gi|115390867|ref|XP_001212938.1|	-	-	-
g1967	contig_89	1631467	1632875	+	gi|584412205|emb|CDM30971.1|	-	D-serine dehydratase
[truncated: 9,109 more rows]
