# Supplementary material for: Genome Sequencing and Comparative Genomics Analysis Revealed Pathogenic Potential in Penicillium capsulatum as a Novel Fungal Pathogen Belonging to Eurotiales
Source: Front Microbiol. 2016 Oct 5;7:1541. doi: 10.3389/fmicb.2016.01541 (PMC5051111; doi:10.3389/fmicb.2016.01541)
Supplement: Supplementary file 7 [file Table_7.xlsx]

## Sheet: CBS 134186
Table S7. Special genes between two P. capsulatum strains (CBS 134186)
Strain	Gene	Difference ratio	NR database	Swiss-Prot database	PHI	KEGG	Exocrine	Function despcription
CBS 134186	g4616	0.667732	gi|317151342|ref|XP_001824600.2|	Zinc finger protein zas1	-	-	-	hypothetical protein AOR_1_446084 [Aspergillus oryzae RIB40
CBS 134186	g3497	0.659639	gi|255936775|ref|XP_002559414.1|	Smad nuclear-interacting protein 1	-	K13278;EC:3.1.1.5 3.1.1.47 3.5.1.1	-	Pc13g09920 [Penicillium rubens Wisconsin 54-125
CBS 134186	g10945	0.615836	gi|255952677|ref|XP_002567091.1|	S-antigen protein	-	-	-	hypothetical protein [Penicillium rubens Wisconsin 54-1255]
CBS 134186	g8771	0.606557	gi|425774046|gb|EKV12369.1|	-	-	K10751	-	Reverse transcriptase, putative [Penicillium digitatum PHI26]
CBS 134186	g4318	0.554201	gi|302881071|ref|XP_003039457.1|	Transcriptional activator ARO80	-	-	-	hypothetical protein NECHADRAFT_89182 [Nectria haematococca mpVI 77-13-4].
CBS 134186	g7486	0.547529	-	-	-	-	-
CBS 134186	g7759	0.535025	gi|584410401|emb|CDM34427.1|	-	-	K14262;EC:3.4.-.-	-	F-box domain, cyclin-like [Penicillium roqueforti FM164]
CBS 134186	g8138	0.517045	gi|425771557|gb|EKV09996.1|	Siderophore iron transporter mirA	-	K01640;EC:4.1.3.4	-	Siderophore iron transporter mirA [Penicillium digitatum Pd1]
CBS 134186	g9996	0.504687	gi|584406432|emb|CDM38074.1|	Short-chain dehydrogenase TIC 32, chloroplastic	-	-	-	Protein of unknown function DUF3445 [Penicillium roqueforti FM164]
CBS 134186	g10464	0.499412	gi|146324801|ref|XP_747518.2|	N amino acid transport system protein	_511_PHI:511_CaNAG4_EAK93098_TX:5476_Candida_albicans_Reduced_virulence	-	-	amino acid transporter [Aspergillus fumigatus Af293]
CBS 134186	g5260	0.481243	gi|584406509|emb|CDM37718.1|	Uncharacterized protein YDR124W	-	K03686	-	Protein of unknown function DUF2841 [Penicillium roqueforti FM164]
CBS 134186	g7830	0.467787	gi|425774057|gb|EKV12377.1|	-	-	-	-	hypothetical protein PDIP_52670 [Penicillium digitatum Pd1]
CBS 134186	g5332	0.454128	gi|350639866|gb|EHA28219.1|	-	-	-	-	hypothetical protein ASPNIDRAFT_43467 [Aspergillus niger ATCC 1015]
CBS 134186	g4589	0.453598	gi|255934056|ref|XP_002558309.1|	-	-	K14297	-	Pc12g15060 [Penicillium rubens Wisconsin 54-1255]
CBS 134186	g3924	0.44385	gi|255954517|ref|XP_002568011.1|	Short-chain dehydrogenase reductase 5	-	-	-	Pc21g09750 [Penicillium rubens Wisconsin 54-1255].
CBS 134186	g6021	0.443662	gi|591460186|gb|EXL91788.1|	Isotrichodermin C-15 hydroxylase	-	-	-	hypothetical protein FOIG_15109 [Fusarium oxysporum f. sp. cubense tropical race 4 54006
CBS 134186	g860	0.439394	gi|584406931|emb|CDM37236.1|	-	-	-	-	Zn(2)-C6 fungal-type DNA-binding domain [Penicillium roqueforti FM164
CBS 134186	g5422	0.433544	gi|525585257|gb|EPS31507.1|	-	-	-	yes	hypothetical protein PDE_06462 [Penicillium oxalicum 114-2]
CBS 134186	g10769	0.431223	gi|255935123|ref|XP_002558588.1|	Serine/threonine-protein kinase ppk6	_1253_PHI:1253_FGSG_11614_I1RS57_5518_Gibberella_zeae_(related:_Fusarium_graminearum)_Unaffected_pathogenicity	-	-	Pc13g01430 [Penicillium rubens Wisconsin 54-1255]
CBS 134186	g97	0.423275	gi|525582807|gb|EPS29057.1|	Vegetative incompatibility protein HET-E-1	_211_PHI:211_CaTUP1_AAB63195_TX:5476_Candida_albicans_Reduced_virulence	-	-	hypothetical protein PDE_04004 [Penicillium oxalicum 114-2]
CBS 134186	g340	0.376106	gi|584416317|emb|CDM28018.1|	Lipase B	-	K04082	-	unnamed protein product [Penicillium roqueforti FM164]
CBS 134186	g74	0.372642	gi|317148732|ref|XP_001822829.2|	Uncharacterized WD repeat-containing protein alr3466	_2020_PHI:2020_Tup1_XP_759427_5270_Ustilago_maydis_Mixed_outcome	-	-	NACHT and WD40 domain protein [Aspergillus oryzae RIB40
CBS 134186	g110	0.367432	gi|115384802|ref|XP_001208948.1|	Nudix hydrolase 1	-	-	-	predicted protein [Aspergillus terreus NIH2624]
CBS 134186	g4337	0.358852	gi|15293428|gb|AAK94952.1|AF396969_1	-	-	K02178;EC:2.7.11.1	-	VspA [Mycoplasma bovis];VspA [Mycoplasma bovis]
CBS 134186	g3448	0.351916	gi|119499367|ref|XP_001266441.1|	Putative bifunctional amine oxidase DDB_G0291301	-	K11228;EC:2.7.11.1	-	flavin-containing amine oxidase, putative [Neosartorya fischeri NRRL 181]
CBS 134186	g4326	0.34375	gi|255943453|ref|XP_002562495.1|	-	-	-	-	Pc18g06690 [Penicillium rubens Wisconsin 54-1255]
CBS 134186	g1790	0.333333	-	-	-	-	-
CBS 134186	g7981	0.331504	gi|255948082|ref|XP_002564808.1|	Sphingolipid long chain base-responsive protein LSP1	-	-	-	Pc22g07920 [Penicillium rubens Wisconsin 54-1255]
CBS 134186	g11073	0.323944	-	-	-	-	-
CBS 134186	g8063	0.316	gi|525586732|gb|EPS32982.1|	UPF0311 protein RPA1785	-	-	yes	hypothetical protein PDE_07943 [Penicillium oxalicum 114-2]
CBS 134186	g7858	0.296629	gi|317148732|ref|XP_001822829.2|	Vegetative incompatibility protein HET-E-1	_2020_PHI:2020_Tup1_XP_759427_5270_Ustilago_maydis_Mixed_outcome	-	-	NACHT and WD40 domain protein [Aspergillus oryzae RIB40]
CBS 134186	g1792	0.294118	gi|425781333|gb|EKV19307.1|	-	-	-	-	hypothetical protein PDIG_03370 [Penicillium digitatum PHI26]
CBS 134186	g5899	0.293706	-	-	-	K01824;EC:5.3.3.5	-
CBS 134186	g4335	0.275132	gi|531861339|gb|EQK99435.1|	-	-	-	-	hypothetical protein OCS_04856 [Ophiocordyceps sinensis CO18]
CBS 134186	g4332	0.228956	gi|599150241|gb|EYE89895.1|	ATP-dependent DNA helicase RecQ	-	K00749;EC:2.4.1.183	-
CBS 134186	g1020	0.222857	gi|317029242|ref|XP_001391078.2|	Uncharacterized transcriptional regulatory protein C11D3.07c	-	-	-	hypothetical protein ANI_1_628054 [Aspergillus niger CBS 513.88]
CBS 134186	g8176	0.219048	gi|255951846|ref|XP_002566689.1|	-	-	K12385	-	hypothetical protein [Penicillium rubens Wisconsin 54-1255]
CBS 134186	g5304	0.215548	gi|584407143|emb|CDM37451.1|	Transcriptional activator of proteases prtT	-	-	-	Zn(2)-C6 fungal-type DNA-binding domain [Penicillium roqueforti FM164
CBS 134186	g4152	0.208955	gi|242816502|ref|XP_002486791.1|	Retrovirus-related Pol polyprotein from transposon 17.6	_876_PHI:876_MGG_11671_EDK03349_TX:318829_Magnaporthe_oryzae_Reduced_virulence	-	-	gag/polymerase/env polyprotein, putative [Talaromyces stipitatus ATCC 10500
CBS 134186	g477	0.20587	gi|380490412|emb|CCF36031.1|	Urea amidolyase	_1385_PHI:1385_GzC2H048_I1RSF7_5518_Gibberella_zeae_(related:_Fusarium_graminearum)_Unaffected_pathogenicity	-	-	urea carboxylase [Colletotrichum higginsianum]
CBS 134186	g8788	0.204225	gi|591435073|gb|EXL68059.1|	Benzoate 4-monooxygenase	-	K08286;EC:2.7.11.-	-	hypothetical protein FOPG_15856 [Fusarium oxysporum f. sp. conglutinans race 2 54008]
CBS 134186	g7826	0.203562	gi|255947778|ref|XP_002564656.1|	-	-	K13162	-	Pc22g06260 [Penicillium rubens Wisconsin 54-1255]
CBS 134186	g10971	0.201681	gi|255943568|ref|XP_002562552.1|	Ankyrin-3	_1260_PHI:1260_FGSG_13944_I1RUC7_5518_Gibberella_zeae_(related:_Fusarium_graminearum)_Unaffected_pathogenicity	-	-	Pc19g00650 [Penicillium rubens Wisconsin 54-1255]
CBS 134186	g8202	0.197222	gi|154271274|ref|XP_001536490.1|	-	-	-	-	conserved hypothetical protein [Histoplasma capsulatum NAm1]
CBS 134186	g10728	0.188732	gi|399166991|emb|CCE32160.1|	Acidic mammalian chitinase	-	-	-	related to chitinase [Claviceps purpurea 20.1]
CBS 134186	g512	0.176744	gi|255950012|ref|XP_002565773.1|	1,3-beta-glucanosyltransferase gel3	_522_PHI:522_GAS1_AAX78216_TX:5507_Fusarium_oxysporum_Reduced_virulence	-	yes	Pc22g18680 [Penicillium rubens Wisconsin 54-1255]
CBS 134186	g4381	0.174807	gi|255933357|ref|XP_002558149.1|	-	-	K06072;EC:1.14.99.29	-	Pc12g13410 [Penicillium rubens Wisconsin 54-1255]
CBS 134186	g4889	0.172535	gi|238491252|ref|XP_002376863.1|	Arginine metabolism regulation protein II	_1991_PHI:1991_GzZC306_I1R9K1_5518_Gibberella_zeae_(related:_Fusarium_graminearum)_Lethal	-	-	conserved hypothetical protein [Aspergillus flavus NRRL3357]
CBS 134186	g11047	0.171717	gi|154287244|ref|XP_001544417.1|	-	-	-	-	hypothetical protein HCAG_01464 [Histoplasma capsulatum NAm1]
CBS 134186	g10797	0.168269	gi|525584064|gb|EPS30314.1|	Probable peptide methionine sulfoxide reductase	-	-	-	hypothetical protein PDE_05265 [Penicillium oxalicum 114-2]
CBS 134186	g7419	0.167899	gi|584411275|emb|CDM30038.1|	RNA polymerase I-specific transcription initiation factor RRN6	-	-	-	RNA polymerase I-specific transcription initiation factor RRN6-like [Penicillium roqueforti FM164]
CBS 134186	g9481	0.164921	gi|296806383|ref|XP_002844001.1|	Acyl-CoA desaturase	_2605_PHI:2605_hgc1_Q5ABE2__746128_Aspergillus_fumigatus_Mixed_outcome	-	-	Stearic acid desaturase [Arthroderma otae CBS 113480]
CBS 134186	g3892	0.162602	gi|584414184|emb|CDM32961.1|	ADP-ribosylation factor-like protein 1	-	-	-	Small GTP-binding protein domain [Penicillium roqueforti FM164]
CBS 134186	g3675	0.155594	gi|358374465|dbj|GAA91057.1|	Nitrogen assimilation transcription factor nirA	-	K06671	-	pathway-specific regulatory protein [Aspergillus kawachii IFO 4308
CBS 134186	g10805	0.145631	gi|255942927|ref|XP_002562232.1|	-	-	-	-	Pc18g03960 [Penicillium rubens Wisconsin 54-1255]
CBS 134186	g1002	0.144337	gi|317140077|ref|XP_003189233.1|	Vegetative incompatibility protein HET-E-1	_2020_PHI:2020_Tup1_XP_759427_5270_Ustilago_maydis_Mixed_outcome	-	yes	NACHT and WD40 domain protein [Aspergillus oryzae RIB40]
CBS 134186	g8603	0.141361	gi|584412614|emb|CDM31382.1|	Ribonucleases P/MRP protein subunit POP5	-	-	-	Ribonuclease P/MRP protein subunit [Penicillium roqueforti FM164]
CBS 134186	g492	0.137184	gi|584416141|emb|CDM27841.1|	Probable L-xylulose reductase	-	-	-	Short-chain dehydrogenase/reductase SDR [Penicillium roqueforti FM164
CBS 134186	g7686	0.136237	gi|255947484|ref|XP_002564509.1|	DNA replication complex GINS protein psf3	-	-	-	Pc22g04710 [Penicillium rubens Wisconsin 54-1255]
CBS 134186	g10108	0.134091	gi|584414580|emb|CDM26268.1|	Monocarboxylate transporter 10	-	-	-	Major facilitator superfamily [Penicillium roqueforti FM164]
CBS 134186	g4663	0.13308	gi|584410169|emb|CDM34194.1|	Glucan endo-1,3-beta-glucosidase BGN13.1	-	K11400	-	Glucan endo-1,3-beta-glucosidase BGN13.1 [Penicillium roqueforti FM164]
CBS 134186	g7818	0.131363	gi|255955207|ref|XP_002568356.1|	Benzoate 4-monooxygenase	_438_PHI:438_BcBOT1_(related:_CND5)_AAQ16576_TX:40559_Botrytis_cinerea_Reduced_virulence	-	-	Pc21g13380 [Penicillium rubens Wisconsin 54-1255
CBS 134186	g4828	0.130612	gi|255937503|ref|XP_002559778.1|	Serine/threonine-protein kinase SRPK	_1270_PHI:1270_FGSG_06420_I1RHA1_5518_Gibberella_zeae_(related:_Fusarium_graminearum)_Unaffected_pathogenicity	K01078;EC:3.1.3.2	yes	Pc13g13640 [Penicillium rubens Wisconsin 54-1255
CBS 134186	g7918	0.12367	gi|584407748|emb|CDM36575.1|	Uncharacterized WD repeat-containing protein C13G6.08	_346_PHI:346_CRU1_AAN10186_TX:5270_Ustilago_maydis_Reduced_virulence	-	-	WD40/YVTN repeat-like-containing domain [Penicillium roqueforti FM164]
CBS 134186	g1667	0.115385	gi|525580385|gb|EPS26635.1|	Endochitinase 1	_144_PHI:144_CHT42_AAC05829_TX:29875_Trichoderma_virens_Reduced_virulence	K01900;EC:6.2.1.4 6.2.1.5	-	putative chitinase [Penicillium oxalicum 114-2]
CBS 134186	g2038	0.114754	gi|255950692|ref|XP_002566113.1|	Phospho-2-dehydro-3-deoxyheptonate aldolase, phenylalanine-inhibited	-	-	-	Pc22g22180 [Penicillium rubens Wisconsin 54-1255]
CBS 134186	g7584	0.114504	-	-	-	K10405	-
CBS 134186	g7543	0.113879	gi|242797877|ref|XP_002483052.1|	-	-	K01754;EC:4.3.1.19	-	hypothetical protein TSTA_009400 [Talaromyces stipitatus ATCC 10500]
CBS 134186	g1658	0.113669	gi|557722234|dbj|GAD98966.1|	Laccase-5	_397_PHI:397_LAC2_AAV64894_TX:5207_Cryptococcus_neoformans_Unaffected_pathogenicity	-	-	multicopper like protein [Byssochlamys spectabilis No. 5]
CBS 134186	g3774	0.112245	gi|425781155|gb|EKV19137.1|	Serine/threonine-protein kinase shk1/pak1	-	-	-	Serine/threonine-protein kinase bur1 [Penicillium digitatum PHI26]
CBS 134186	g3895	0.110169	gi|584417234|emb|CDM28944.1|	Uncharacterized glycosidase Rv0584	-	K06173;EC:5.4.99.12	-	Alpha-1,2-mannosidase, putative [Penicillium roqueforti FM164
CBS 134186	g2960	0.109512	gi|255931173|ref|XP_002557143.1|	Myosin-1	_1648_PHI:1648_GzWing020_I1RWP1_5518_Gibberella_zeae_(related:_Fusarium_graminearum)_Reduced_virulence	-	-	Pc12g02550 [Penicillium rubens Wisconsin 54-1255]
CBS 134186	g10089	0.10929	gi|530474390|gb|EQB54629.1|	Quinate permease	-	-	-	hypothetical protein CGLO_05511 [Colletotrichum gloeosporioides Cg-14]
CBS 134186	g1678	0.108021	gi|255943453|ref|XP_002562495.1|	-	-	K12874	-	Pc18g06690 [Penicillium rubens Wisconsin 54-1255]
CBS 134186	g7407	0.106592	gi|255939552|ref|XP_002560545.1|	Probable maltose O-acetyltransferase	_1772_PHI:1772_GzZC087_I1S053_5518_Gibberella_zeae_(related:_Fusarium_graminearum)_Reduced_virulence	-	-	Pc16g01710 [Penicillium rubens Wisconsin 54-1255]
CBS 134186	g3775	0.101879	gi|425773664|gb|EKV12001.1|	-	-	-	-	hypothetical protein PDIG_47160 [Penicillium digitatum PHI26]
CBS 134186	g4703	0.101399	gi|597921322|ref|XP_007315005.1|	Uncharacterized oxidoreductase SERP2049_x0001_sp|Q8CN40.1|Y2036_STAES RecName: Full=Uncharacterized oxidoreductase SE_2036	-	-	-	hypothetical protein SERLADRAFT_446205 [Serpula lacrymans var. lacrymans S7.9]

## Sheet: ATCC 48735
Table S7. Special genes between two P. capsulatum strains (ATCC 48735)
Strain	Gene	Difference ratio	NR database	Swiss-Prot database	PHI	KEGG	Exocrine	Function despcription
ATCC 48735	g2296	0.877957	gi|242816502|ref|XP_002486791.1|	Retrotransposable element Tf2 155 kDa protein type 1	_876_PHI:876_MGG_11671_EDK03349_TX:318829_Magnaporthe_oryzae_Reduced_virulence	-	-	gag/polymerase/env polyprotein, putative [Talaromyces stipitatus ATCC 10500]
ATCC 48735	g3994	0.794038	gi|317141056|ref|XP_003189326.1|	-	-	-	-	transposase [Aspergillus oryzae RIB40]
ATCC 48735	g9016	0.746914	gi|425768563|gb|EKV07082.1|	-	-	-	-	hypothetical protein PDIP_75110 [Penicillium digitatum Pd1]
ATCC 48735	g11072	0.62029	gi|599150241|gb|EYE89895.1|	ATP-dependent DNA helicase Q1	-	-	-	P-loop containing nucleoside triphosphate hydrolase protein,partial [Aspergillus ruber CBS 135680]
ATCC 48735	g6070	0.610561	gi|326484378|gb|EGE08388.1|	-	-	-	-	hypothetical protein TEQG_08800 [Trichophyton equinum CBS 127.97]
ATCC 48735	g11050	0.58427	-	-	-	-	-
ATCC 48735	g10637	0.543614	gi|255941398|ref|XP_002561468.1|	Hydrogen peroxide stress regulator 1	_1389_PHI:1389_GzC2H052_I1RTJ6_5518_Gibberella_zeae_(related:_Fusarium_graminearum)_Lethal	-	-	Pc16g11660 [Penicillium rubens Wisconsin 54-1255]
ATCC 48735	g11045	0.540052	gi|154274776|ref|XP_001538239.1|	Retrotransposable element Tf2 155 kDa protein type 1	_876_PHI:876_MGG_11671_EDK03349_TX:318829_Magnaporthe_oryzae_Reduced_virulence	-	-	hypothetical protein HCAG_05844 [Histoplasma capsulatum NAm1]
ATCC 48735	g8219	0.508449	gi|154287136|ref|XP_001544363.1|	ATP-dependent DNA helicase Q1	-	-	-	conserved hypothetical protein [Histoplasma capsulatum NAm1]
ATCC 48735	g8932	0.468182	gi|315041357|ref|XP_003170055.1|	Retrotransposable element Tf2 155 kDa protein type 1	_876_PHI:876_MGG_11671_EDK03349_TX:318829_Magnaporthe_oryzae_Reduced_virulence	-	-	hypothetical protein MGYG_09147 [Microsporum gypseum CBS 118893]
ATCC 48735	g11064	0.412405	gi|154285338|ref|XP_001543464.1|	Retrotransposable element Tf2 155 kDa protein type 1	_876_PHI:876_MGG_11671_EDK03349_TX:318829_Magnaporthe_oryzae_Reduced_virulence	-	-	hypothetical protein HCAG_00510 [Histoplasma capsulatum NAm1]
ATCC 48735	g10653	0.373665	gi|119485867|ref|XP_001262276.1|	-	-	-	-	hypothetical protein NFIA_100160 [Neosartorya fischeri NRRL 181]
ATCC 48735	g9014	0.36339	gi|242816502|ref|XP_002486791.1|	Retrotransposable element Tf2 155 kDa protein type 1	_876_PHI:876_MGG_11671_EDK03349_TX:318829_Magnaporthe_oryzae_Reduced_virulence	K00432;EC:1.11.1.9	-	gag/polymerase/env polyprotein, putative [Talaromyces stipitatus ATCC 10500
ATCC 48735	g3320	0.322772	gi|578492690|gb|EUN30088.1|	Protein TOXD	-	-	-	hypothetical protein COCVIDRAFT_35199 [Bipolaris victoriae FI3
ATCC 48735	g2533	0.313492	gi|70998893|ref|XP_754168.1|	Probable deoxyuridine 5'-triphosphate nucleotidohydrolase	-	K00914;EC:2.7.1.137	-	dUTPase [Aspergillus fumigatus Af293
ATCC 48735	g5275	0.305556	-	-	-	-	-
ATCC 48735	g3880	0.299346	gi|238500259|ref|XP_002381364.1|	Calcium-dependent protein kinase 4	-	-	-	serine/threonine protein kinase, putative [Aspergillus flavus NRRL3357
ATCC 48735	g2028	0.284041	gi|530474390|gb|EQB54629.1|	Quinate permease	-	-	-	hypothetical protein CGLO_05511 [Colletotrichum gloeosporioides Cg-14]
ATCC 48735	g11051	0.273224	gi|255951621|ref|XP_002566577.1|	-	-	-	-	Pc23g00070 [Penicillium rubens Wisconsin 54-1255]
ATCC 48735	g6180	0.269811	gi|258562963|ref|XP_002582227.1|	-	-	-	-	predicted protein [Uncinocarpus reesii 1704]
ATCC 48735	g3700	0.262887	gi|584416317|emb|CDM28018.1|	Lipase B	-	-	-	unnamed protein product [Penicillium roqueforti FM164]
ATCC 48735	g6650	0.237797	gi|255939738|ref|XP_002560638.1|	Mannan endo-1,6-alpha-mannosidase DCW1	-	K01012;EC:2.8.1.6	-	Pc16g02660 [Penicillium rubens Wisconsin 54-1255]
ATCC 48735	g10832	0.230404	gi|255930485|ref|XP_002556802.1|	Jerky protein homolog-like	-	-	-	Pc06g01990 [Penicillium rubens Wisconsin 54-1255]
ATCC 48735	g8214	0.229268	-	-	-	-	-
ATCC 48735	g6549	0.216216	-	-	-	-	-
ATCC 48735	g8913	0.212598	gi|350635900|gb|EHA24261.1|	Uncharacterized transporter C417.10	_1662_PHI:1662_GzCCHC002_I1REJ1_5518_Gibberella_zeae_(related:_Fusarium_graminearum)_Unaffected_pathogenicity	-	-	hypothetical protein ASPNIDRAFT_181374, partial [Aspergillus niger ATCC 1015]
ATCC 48735	g8618	0.2	gi|584412614|emb|CDM31382.1|	Ribonucleases P/MRP protein subunit POP5	-	-	-	Ribonuclease P/MRP protein subunit [Penicillium roqueforti FM164]
ATCC 48735	g3872	0.185542	gi|169782411|ref|XP_001825668.1|	-	-	-	-	hypothetical protein AOR_1_270064 [Aspergillus oryzae RIB40]
ATCC 48735	g7114	0.170886	gi|255952677|ref|XP_002567091.1|	-	-	-	-	hypothetical protein [Penicillium rubens Wisconsin 54-1255]
ATCC 48735	g1548	0.168724	gi|584405835|emb|CDM38563.1|	Killer toxin subunits alpha/beta	-	K05293	-	Chitin-binding, type 1 [Penicillium roqueforti FM164]
ATCC 48735	g10261	0.167293	gi|392869093|gb|EAS27587.2|	Altered inheritance of mitochondria protein 9, mitochondrial	-	-	-	hypothetical protein CIMG_09902 [Coccidioides immitis RS]
ATCC 48735	g6824	0.163894	gi|154287136|ref|XP_001544363.1|	ATP-dependent DNA helicase Q1	_544_PHI:544_BCMFS1_AAF64435_TX:332648_Botrytis_cinerea_Unaffected_pathogenicity	-	-	conserved hypothetical protein [Histoplasma capsulatum NAm1]
ATCC 48735	g3874	0.162539	gi|358375843|dbj|GAA92419.1|	Vegetative incompatibility protein HET-E-1	-	-	-	NACHT and WD40 domain protein [Aspergillus kawachii IFO 4308]
ATCC 48735	g2985	0.160699	gi|154287136|ref|XP_001544363.1|	ATP-dependent DNA helicase Q1	-	-	-	conserved hypothetical protein [Histoplasma capsulatum NAm1]
ATCC 48735	g6291	0.149869	gi|255947784|ref|XP_002564659.1|	ATP-dependent zinc metalloprotease FtsH	-	-	-	Pc22g06290 [Penicillium rubens Wisconsin 54-1255]
ATCC 48735	g10824	0.142857	gi|358389255|gb|EHK26847.1|	2-hydroxy-6-oxononadienedioate/2-hydroxy-6- oxononatrienedioate hydrolase	-	-	-	hypothetical protein TRIVIDRAFT_34264 [Trichoderma virens Gv29-8]
ATCC 48735	g6301	0.13242	gi|238506731|ref|XP_002384567.1|	-	-	K11367;EC:3.6.4.12	-	conserved hypothetical protein [Aspergillus flavus NRRL3357]
ATCC 48735	g10256	0.129162	gi|70983812|ref|XP_747432.1|	Calcium-independent phospholipase A2-gamma	-	-	-	Patatin-like serine hydrolase [Aspergillus fumigatus Af293]
ATCC 48735	g4437	0.126801	gi|584411521|emb|CDM30284.1|	Nucleolar transcription factor 1	-	-	-	High mobility group, superfamily [Penicillium roqueforti FM164]
ATCC 48735	g1681	0.110811	gi|255954101|ref|XP_002567803.1|	Cytoplasmic tRNA 2-thiolation protein 2	-	-	-	Pc21g07630 [Penicillium rubens Wisconsin 54-1255]
ATCC 48735	g8789	0.109023	gi|159122808|gb|EDP47929.1|	-	-	-	-	hypothetical protein AFUB_097800 [Aspergillus fumigatus A1163]
ATCC 48735	g6647	0.105263	-	-	-	K00045;EC:1.1.1.67	-
ATCC 48735	g6590	0.101083	gi|242797877|ref|XP_002483052.1|	-	-	K01187;EC:3.2.1.20	-	hypothetical protein TSTA_009400 [Talaromyces stipitatus ATCC10500]
